# Supplementary material for: Quantitative Label-Free Proteomics for Discovery of Biomarkers in Cerebrospinal Fluid: Assessment of Technical and Inter-Individual Variation
Source: PubMed Central journal article supplement (PMC3659127; doi:10.1371/journal.pone.0064314), 2013-05-20

**Correlation C\_pooltop2lg2mean\_tp2 symbol MAF****The CORR Procedure**

Gene\_Symbol=A1BG

2 Variables: top2lg2mean MAF

| Simple Statistics |    |          |         |           |          |          |
|-------------------|----|----------|---------|-----------|----------|----------|
| Variable          | N  | Mean     | Std Dev | Sum       | Minimum  | Maximum  |
| top2lg2mean       | 12 | 22.57461 | 0.11608 | 270.89531 | 22.29520 | 22.78045 |
| MAF               | 12 | 13.83333 | 7.10740 | 166.00000 | 5.00000  | 25.00000 |

| Pearson Correlation Coefficients, N = 12<br>Prob >  r  under H0: Rho=0 |                    |                    |
|------------------------------------------------------------------------|--------------------|--------------------|
|                                                                        | top2lg2mean        | MAF                |
| top2lg2mean                                                            | 1.00000            | -0.01778<br>0.9563 |
| MAF                                                                    | -0.01778<br>0.9563 | 1.00000            |

**Pearson Correlation Statistics (Fisher's z Transformation)**

| Variable    | With Variable | N  | Sample Correlation | Fisher's z | Bias Adjustment | Correlation Estimate | 95% Confidence Limits |          | p Value for H0:Rho=0 |
|-------------|---------------|----|--------------------|------------|-----------------|----------------------|-----------------------|----------|----------------------|
| top2lg2mean | MAF           | 12 | -0.01778           | -0.01779   | -0.0008084      | -0.01698             | -0.585176             | 0.562405 | 0.9574               |

**Correlation C\_pooltop2lg2mean\_tp2 symbol MAF**

**The CORR Procedure**

Gene\_Symbol=A1BG

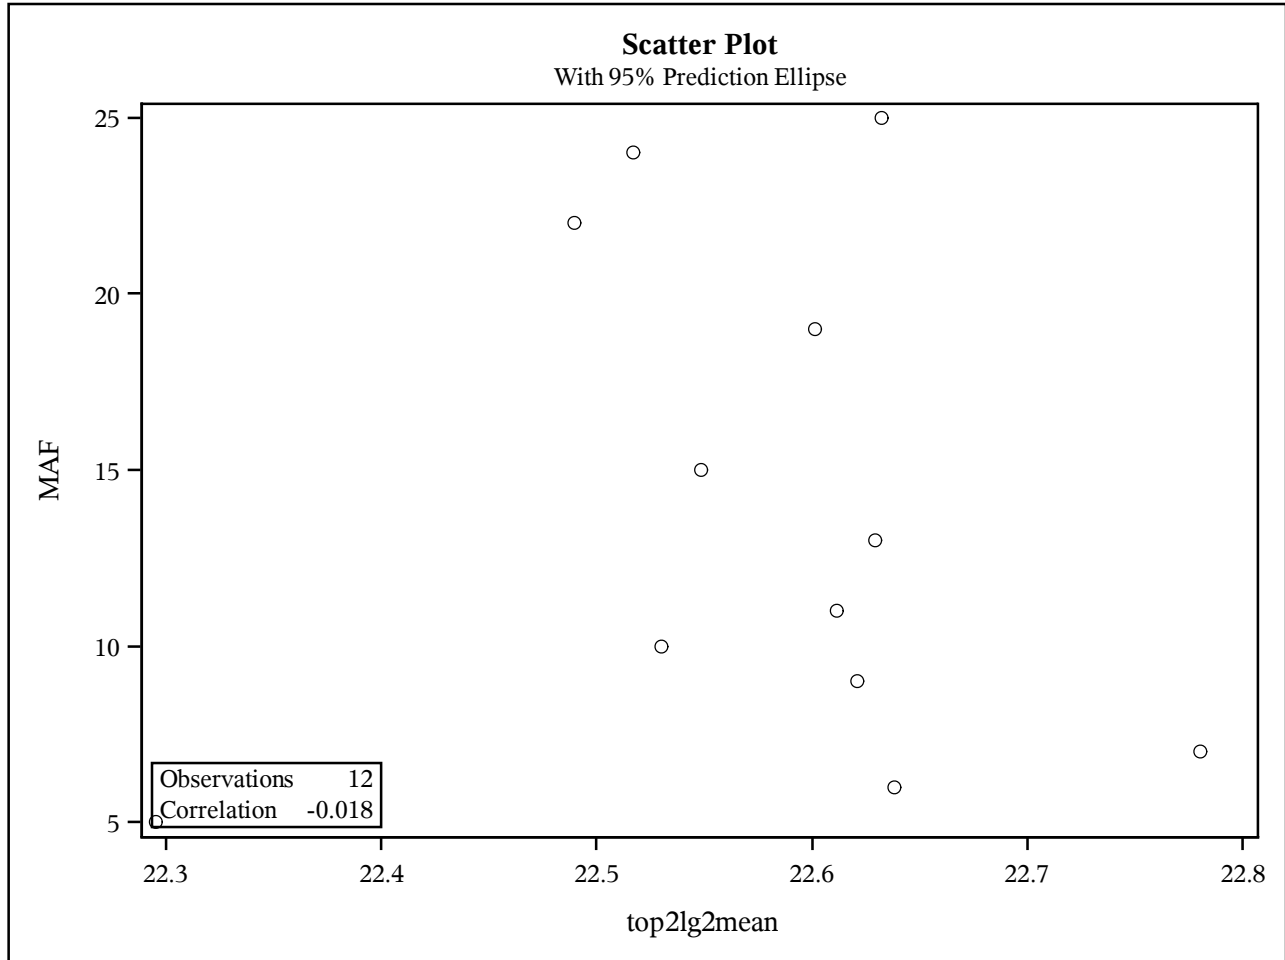

**Correlation C\_pooltop2lg2mean\_tp2 symbol MAF****The CORR Procedure**

Gene\_Symbol=A2M

2 Variables: top2lg2mean MAF

| Simple Statistics |    |          |         |           |          |          |
|-------------------|----|----------|---------|-----------|----------|----------|
| Variable          | N  | Mean     | Std Dev | Sum       | Minimum  | Maximum  |
| top2lg2mean       | 12 | 23.51360 | 0.37790 | 282.16326 | 22.83730 | 24.15903 |
| MAF               | 12 | 13.83333 | 7.10740 | 166.00000 | 5.00000  | 25.00000 |

| Pearson Correlation Coefficients, N = 12<br>Prob >  r  under H0: Rho=0 |                    |                    |
|------------------------------------------------------------------------|--------------------|--------------------|
|                                                                        | top2lg2mean        | MAF                |
| top2lg2mean                                                            | 1.00000            | -0.35552<br>0.2567 |
| MAF                                                                    | -0.35552<br>0.2567 | 1.00000            |

| Pearson Correlation Statistics (Fisher's z Transformation) |               |    |                    |            |                 |                      |                       |          |                      |
|------------------------------------------------------------|---------------|----|--------------------|------------|-----------------|----------------------|-----------------------|----------|----------------------|
| Variable                                                   | With Variable | N  | Sample Correlation | Fisher's z | Bias Adjustment | Correlation Estimate | 95% Confidence Limits |          | p Value for H0:Rho=0 |
| top2lg2mean                                                | MAF           | 12 | -0.35552           | -0.37175   | -0.01616        | -0.34133             | -0.765312             | 0.289233 | 0.2647               |

**Correlation C\_pooltop2lg2mean\_tp2 symbol MAF**

**The CORR Procedure**

Gene\_Symbol=A2M

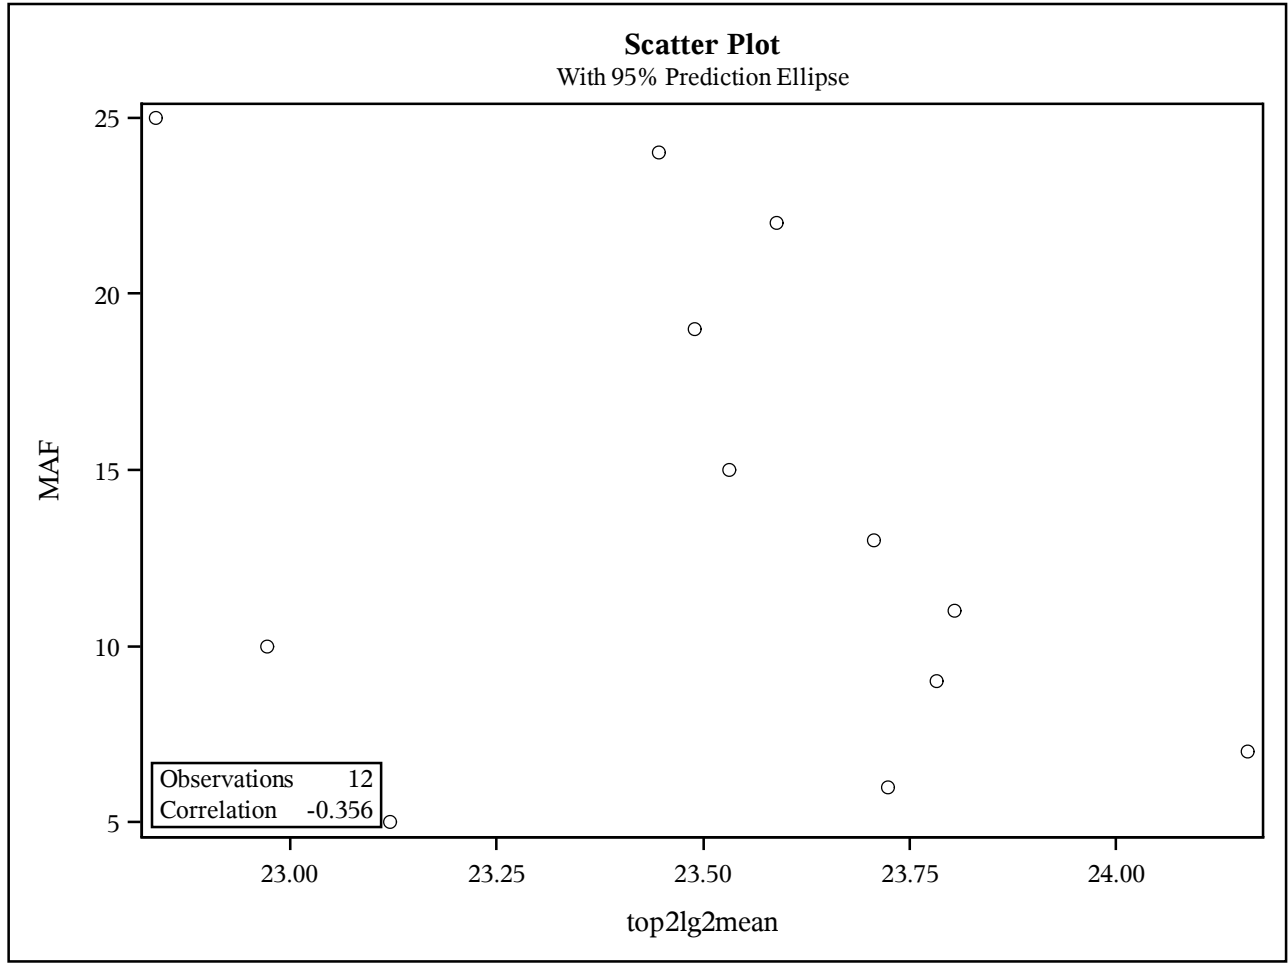

**Correlation C\_pooltop2lg2mean\_tp2 symbol MAF****The CORR Procedure**

Gene\_Symbol=AGT

2 Variables: top2lg2mean MAF

| Simple Statistics |    |          |         |           |          |          |
|-------------------|----|----------|---------|-----------|----------|----------|
| Variable          | N  | Mean     | Std Dev | Sum       | Minimum  | Maximum  |
| top2lg2mean       | 12 | 24.82819 | 0.43733 | 297.93831 | 23.95626 | 25.72056 |
| MAF               | 12 | 13.83333 | 7.10740 | 166.00000 | 5.00000  | 25.00000 |

| Pearson Correlation Coefficients, N = 12<br>Prob >  r  under H0: Rho=0 |                    |                    |
|------------------------------------------------------------------------|--------------------|--------------------|
|                                                                        | top2lg2mean        | MAF                |
| top2lg2mean                                                            | 1.00000            | -0.41920<br>0.1750 |
| MAF                                                                    | -0.41920<br>0.1750 | 1.00000            |

**Pearson Correlation Statistics (Fisher's z Transformation)**

| Variable    | With Variable | N  | Sample Correlation | Fisher's z | Bias Adjustment | Correlation Estimate | 95% Confidence Limits |          | p Value for H0:Rho=0 |
|-------------|---------------|----|--------------------|------------|-----------------|----------------------|-----------------------|----------|----------------------|
| top2lg2mean | MAF           | 12 | -0.41920           | -0.44672   | -0.01905        | -0.40337             | -0.793563             | 0.221906 | 0.1802               |

**Correlation C\_pooltop2lg2mean\_tp2 symbol MAF**

**The CORR Procedure**

Gene\_Symbol=AGT

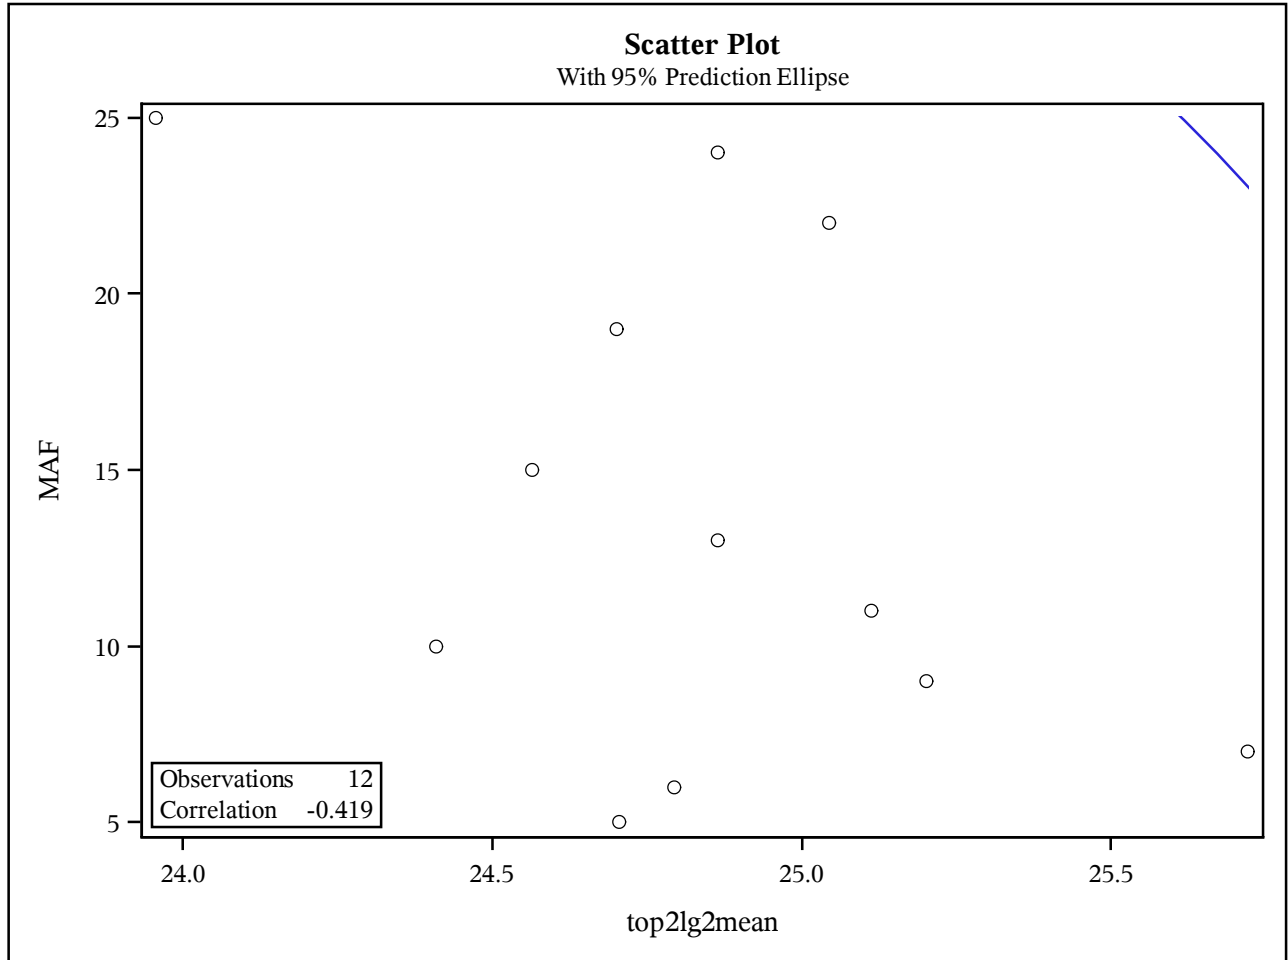

**Correlation C\_pooltop2lg2mean\_tp2 symbol MAF****The CORR Procedure**

Gene\_Symbol=AHSG

2 Variables: top2lg2mean MAF

| Simple Statistics |    |          |         |           |          |          |
|-------------------|----|----------|---------|-----------|----------|----------|
| Variable          | N  | Mean     | Std Dev | Sum       | Minimum  | Maximum  |
| top2lg2mean       | 12 | 22.54882 | 0.14816 | 270.58587 | 22.32566 | 22.82825 |
| MAF               | 12 | 13.83333 | 7.10740 | 166.00000 | 5.00000  | 25.00000 |

| Pearson Correlation Coefficients, N = 12<br>Prob >  r  under H0: Rho=0 |                   |                   |
|------------------------------------------------------------------------|-------------------|-------------------|
|                                                                        | top2lg2mean       | MAF               |
| top2lg2mean                                                            | 1.00000           | 0.07588<br>0.8147 |
| MAF                                                                    | 0.07588<br>0.8147 | 1.00000           |

**Pearson Correlation Statistics (Fisher's z Transformation)**

| Variable    | With Variable | N  | Sample Correlation | Fisher's z | Bias Adjustment | Correlation Estimate | 95% Confidence Limits |          | p Value for H0:Rho=0 |
|-------------|---------------|----|--------------------|------------|-----------------|----------------------|-----------------------|----------|----------------------|
| top2lg2mean | MAF           | 12 | 0.07588            | 0.07603    | 0.00345         | 0.07245              | -0.523203             | 0.620552 | 0.8196               |

**Correlation C\_pooltop2lg2mean\_tp2 symbol MAF**

**The CORR Procedure**

Gene\_Symbol=AHSG

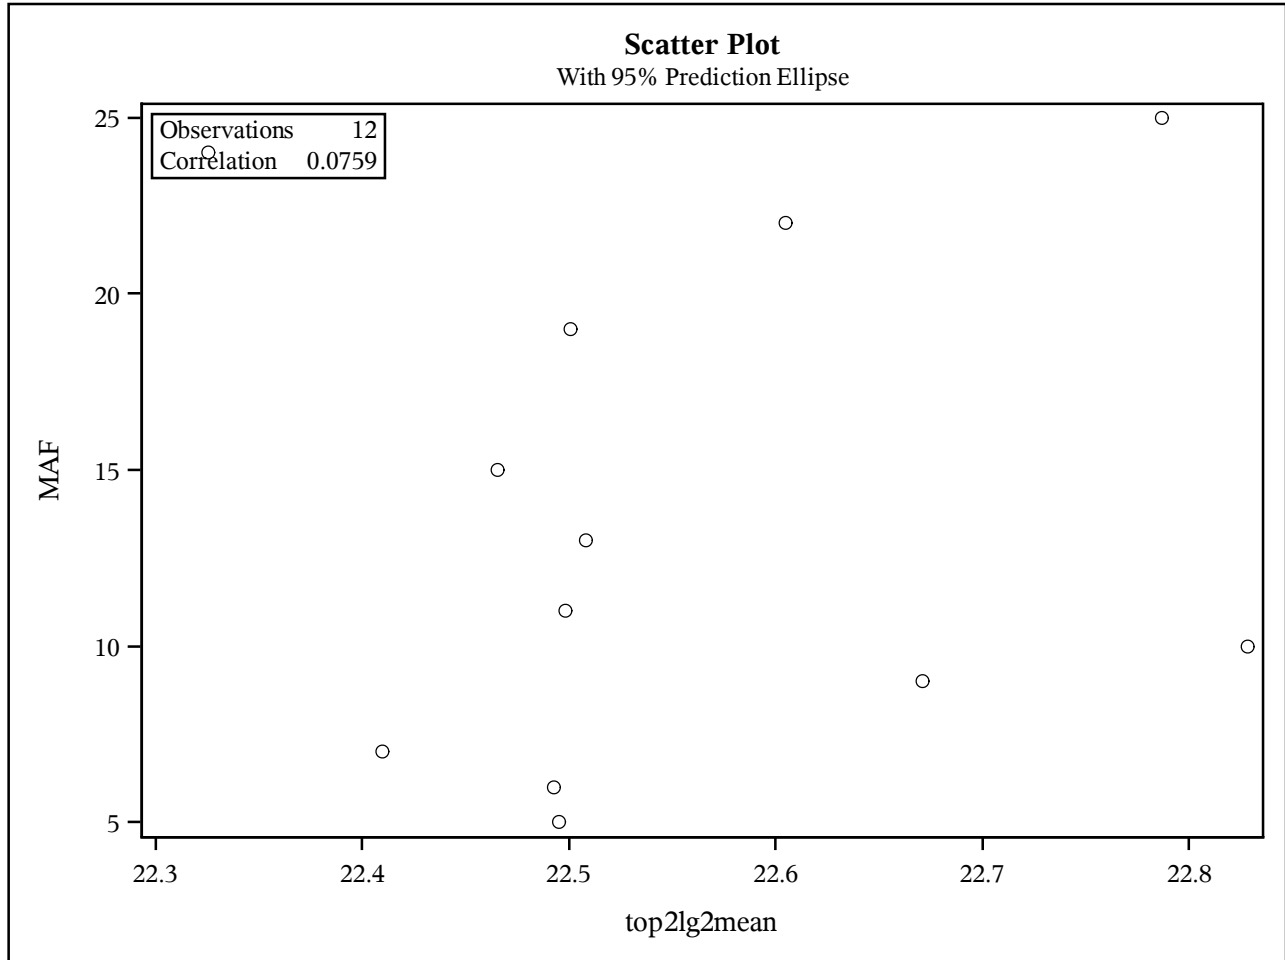



**Correlation C\_pooltop2lg2mean\_tp2 symbol MAF****The CORR Procedure**

Gene\_Symbol=APLP1

2 Variables: top2lg2mean MAF

| Simple Statistics |    |          |         |           |          |          |
|-------------------|----|----------|---------|-----------|----------|----------|
| Variable          | N  | Mean     | Std Dev | Sum       | Minimum  | Maximum  |
| top2lg2mean       | 12 | 23.16222 | 0.29325 | 277.94665 | 22.65640 | 23.64982 |
| MAF               | 12 | 13.83333 | 7.10740 | 166.00000 | 5.00000  | 25.00000 |

| Pearson Correlation Coefficients, N = 12<br>Prob >  r  under H0: Rho=0 |                    |                    |
|------------------------------------------------------------------------|--------------------|--------------------|
|                                                                        | top2lg2mean        | MAF                |
| top2lg2mean                                                            | 1.00000            | -0.36811<br>0.2391 |
| MAF                                                                    | -0.36811<br>0.2391 | 1.00000            |

**Pearson Correlation Statistics (Fisher's z Transformation)**

| Variable    | With Variable | N  | Sample Correlation | Fisher's z | Bias Adjustment | Correlation Estimate | 95% Confidence Limits |          | p Value for H0:Rho=0 |
|-------------|---------------|----|--------------------|------------|-----------------|----------------------|-----------------------|----------|----------------------|
| top2lg2mean | MAF           | 12 | -0.36811           | -0.38623   | -0.01673        | -0.35356             | -0.771014             | 0.276437 | 0.2466               |

**Correlation C\_pooltop2lg2mean\_tp2 symbol MAF****The CORR Procedure**

Gene\_Symbol=APLP1

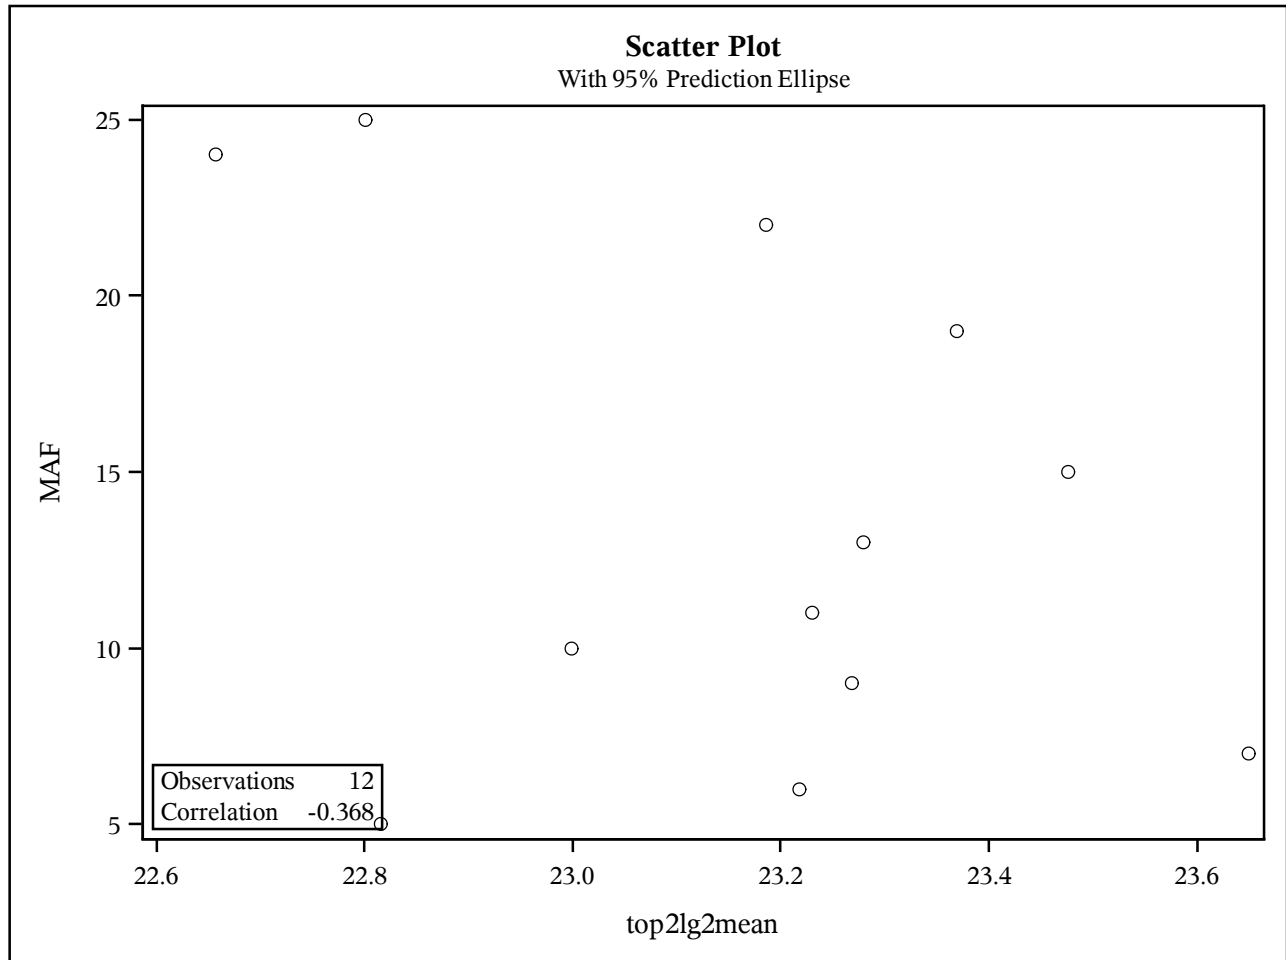

**Correlation C\_pooltop2lg2mean\_tp2 symbol MAF****The CORR Procedure**

Gene\_Symbol=APOA1

2 Variables: top2lg2mean MAF

| Simple Statistics |    |          |         |           |          |          |
|-------------------|----|----------|---------|-----------|----------|----------|
| Variable          | N  | Mean     | Std Dev | Sum       | Minimum  | Maximum  |
| top2lg2mean       | 12 | 25.58229 | 0.22491 | 306.98745 | 25.28807 | 25.94263 |
| MAF               | 12 | 13.83333 | 7.10740 | 166.00000 | 5.00000  | 25.00000 |

| Pearson Correlation Coefficients, N = 12<br>Prob >  r  under H0: Rho=0 |                   |                   |
|------------------------------------------------------------------------|-------------------|-------------------|
|                                                                        | top2lg2mean       | MAF               |
| top2lg2mean                                                            | 1.00000           | 0.15545<br>0.6295 |
| MAF                                                                    | 0.15545<br>0.6295 | 1.00000           |

**Pearson Correlation Statistics (Fisher's z Transformation)**

| Variable    | With Variable | N  | Sample Correlation | Fisher's z | Bias Adjustment | Correlation Estimate | 95% Confidence Limits |          | p Value for H0:Rho=0 |
|-------------|---------------|----|--------------------|------------|-----------------|----------------------|-----------------------|----------|----------------------|
| top2lg2mean | MAF           | 12 | 0.15545            | 0.15672    | 0.00707         | 0.14854              | -0.464998             | 0.665696 | 0.6382               |

**Correlation C\_pooltop2lg2mean\_tp2 symbol MAF**

**The CORR Procedure**

Gene\_Symbol=APOA1

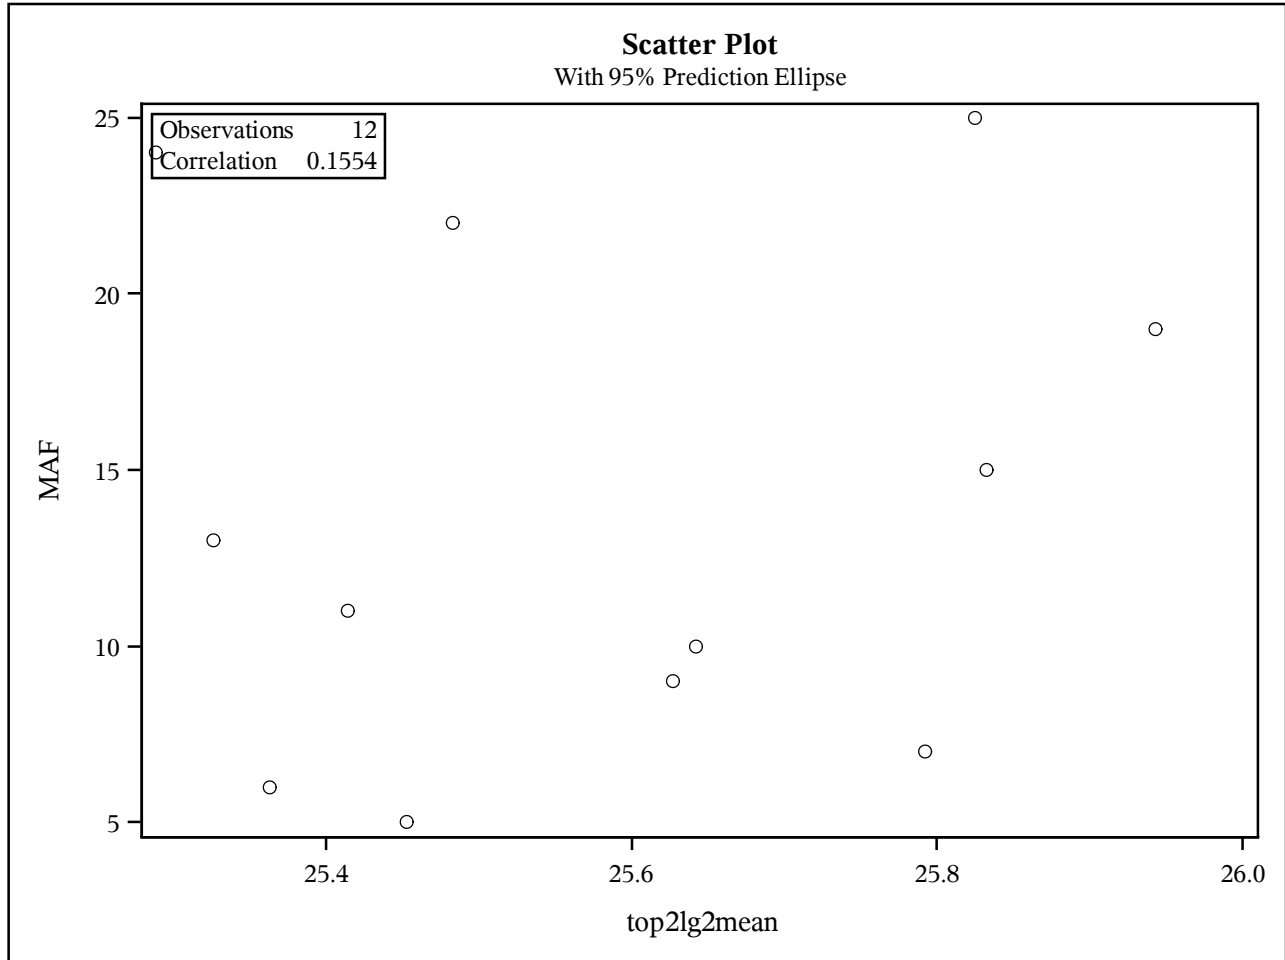

**Correlation C\_pooltop2lg2mean\_tp2 symbol MAF****The CORR Procedure**

Gene\_Symbol=APOA4

2 Variables: top2lg2mean MAF

| Simple Statistics |    |          |         |           |          |          |
|-------------------|----|----------|---------|-----------|----------|----------|
| Variable          | N  | Mean     | Std Dev | Sum       | Minimum  | Maximum  |
| top2lg2mean       | 12 | 21.32405 | 0.37275 | 255.88859 | 20.64906 | 21.96869 |
| MAF               | 12 | 13.83333 | 7.10740 | 166.00000 | 5.00000  | 25.00000 |

| Pearson Correlation Coefficients, N = 12<br>Prob >  r  under H0: Rho=0 |                   |                   |
|------------------------------------------------------------------------|-------------------|-------------------|
|                                                                        | top2lg2mean       | MAF               |
| top2lg2mean                                                            | 1.00000           | 0.16787<br>0.6020 |
| MAF                                                                    | 0.16787<br>0.6020 | 1.00000           |

**Pearson Correlation Statistics (Fisher's z Transformation)**

| Variable    | With Variable | N  | Sample Correlation | Fisher's z | Bias Adjustment | Correlation Estimate | 95% Confidence Limits |          | p Value for H0:Rho=0 |
|-------------|---------------|----|--------------------|------------|-----------------|----------------------|-----------------------|----------|----------------------|
| top2lg2mean | MAF           | 12 | 0.16787            | 0.16948    | 0.00763         | 0.16045              | -0.455387             | 0.672431 | 0.6112               |

**Correlation  $C_{pool}$  top2lg2mean\_tp2 symbol MAF****The CORR Procedure**

Gene\_Symbol=APOA4

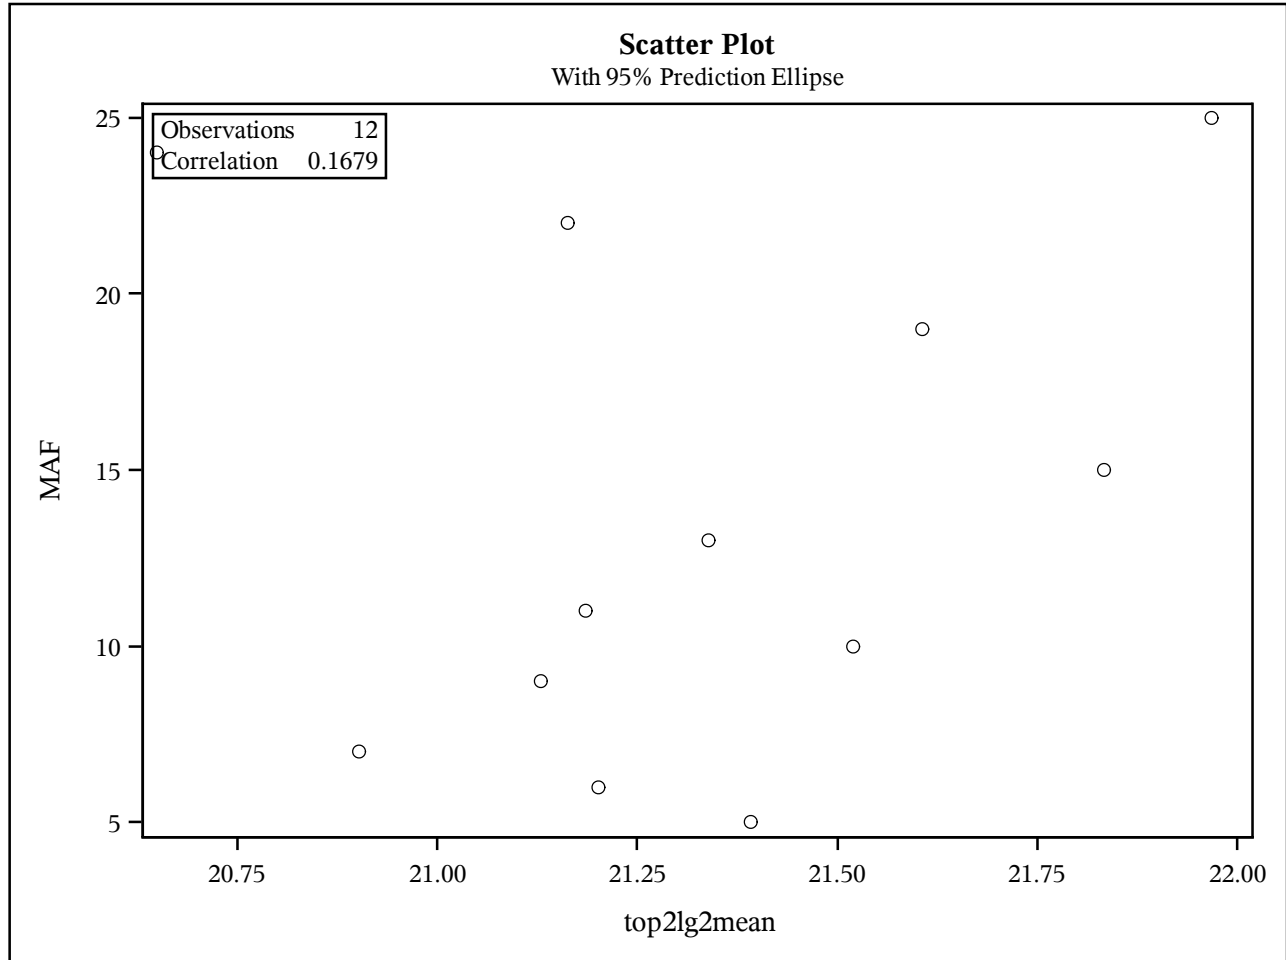

**Correlation C\_pooltop2lg2mean\_tp2 symbol MAF****The CORR Procedure**

Gene\_Symbol=APOD

2 Variables: top2lg2mean MAF

| Simple Statistics |    |          |         |           |          |          |
|-------------------|----|----------|---------|-----------|----------|----------|
| Variable          | N  | Mean     | Std Dev | Sum       | Minimum  | Maximum  |
| top2lg2mean       | 12 | 21.87122 | 0.34024 | 262.45467 | 21.17123 | 22.36336 |
| MAF               | 12 | 13.83333 | 7.10740 | 166.00000 | 5.00000  | 25.00000 |

| Pearson Correlation Coefficients, N = 12<br>Prob >  r  under H0: Rho=0 |                   |                   |
|------------------------------------------------------------------------|-------------------|-------------------|
|                                                                        | top2lg2mean       | MAF               |
| top2lg2mean                                                            | 1.00000           | 0.26564<br>0.4040 |
| MAF                                                                    | 0.26564<br>0.4040 | 1.00000           |

**Pearson Correlation Statistics (Fisher's z Transformation)**

| Variable    | With Variable | N  | Sample Correlation | Fisher's z | Bias Adjustment | Correlation Estimate | 95% Confidence Limits |          | p Value for H0:Rho=0 |
|-------------|---------------|----|--------------------|------------|-----------------|----------------------|-----------------------|----------|----------------------|
| top2lg2mean | MAF           | 12 | 0.26564            | 0.27216    | 0.01207         | 0.25438              | -0.374145             | 0.722764 | 0.4142               |

**Correlation C\_pooltop2lg2mean\_tp2 symbol MAF****The CORR Procedure**

Gene\_Symbol=APOD

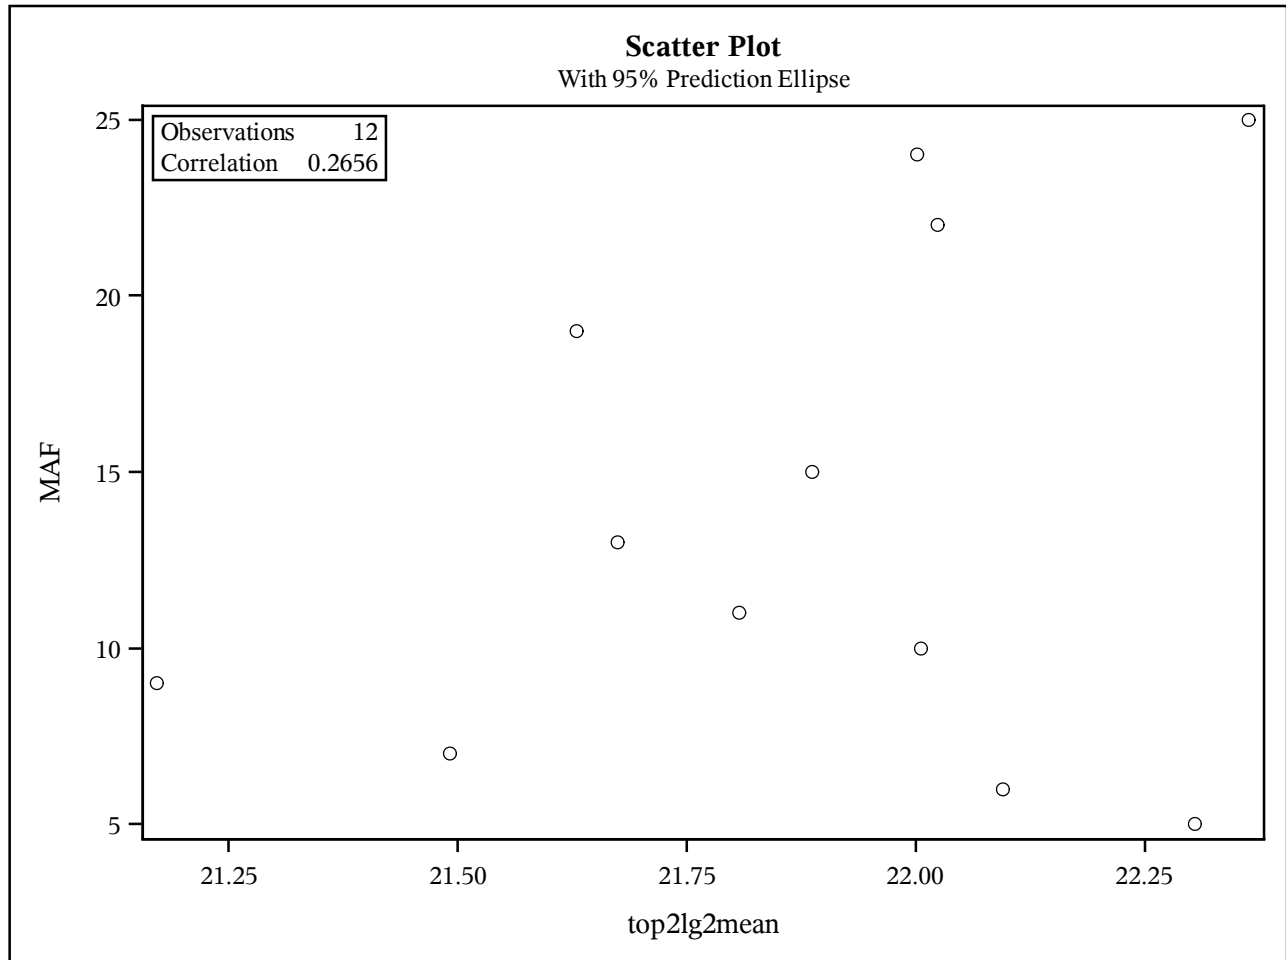



**Correlation C\_pooltop2lg2mean\_tp2 symbol MAF****The CORR Procedure**

Gene\_Symbol=APOE

2 Variables: top2lg2mean MAF

| Simple Statistics |    |          |         |           |          |          |
|-------------------|----|----------|---------|-----------|----------|----------|
| Variable          | N  | Mean     | Std Dev | Sum       | Minimum  | Maximum  |
| top2lg2mean       | 12 | 23.90888 | 0.30086 | 286.90650 | 23.33682 | 24.38528 |
| MAF               | 12 | 13.83333 | 7.10740 | 166.00000 | 5.00000  | 25.00000 |

| Pearson Correlation Coefficients, N = 12<br>Prob >  r  under H0: Rho=0 |                   |                   |
|------------------------------------------------------------------------|-------------------|-------------------|
|                                                                        | top2lg2mean       | MAF               |
| top2lg2mean                                                            | 1.00000           | 0.16097<br>0.6172 |
| MAF                                                                    | 0.16097<br>0.6172 | 1.00000           |

**Pearson Correlation Statistics (Fisher's z Transformation)**

| Variable    | With Variable | N  | Sample Correlation | Fisher's z | Bias Adjustment | Correlation Estimate | 95% Confidence Limits |          | p Value for H0:Rho=0 |
|-------------|---------------|----|--------------------|------------|-----------------|----------------------|-----------------------|----------|----------------------|
| top2lg2mean | MAF           | 12 | 0.16097            | 0.16238    | 0.00732         | 0.15384              | -0.460742             | 0.668701 | 0.6261               |

**Correlation C\_pooltop2lg2mean\_tp2 symbol MAF****The CORR Procedure**

Gene\_Symbol=APOE

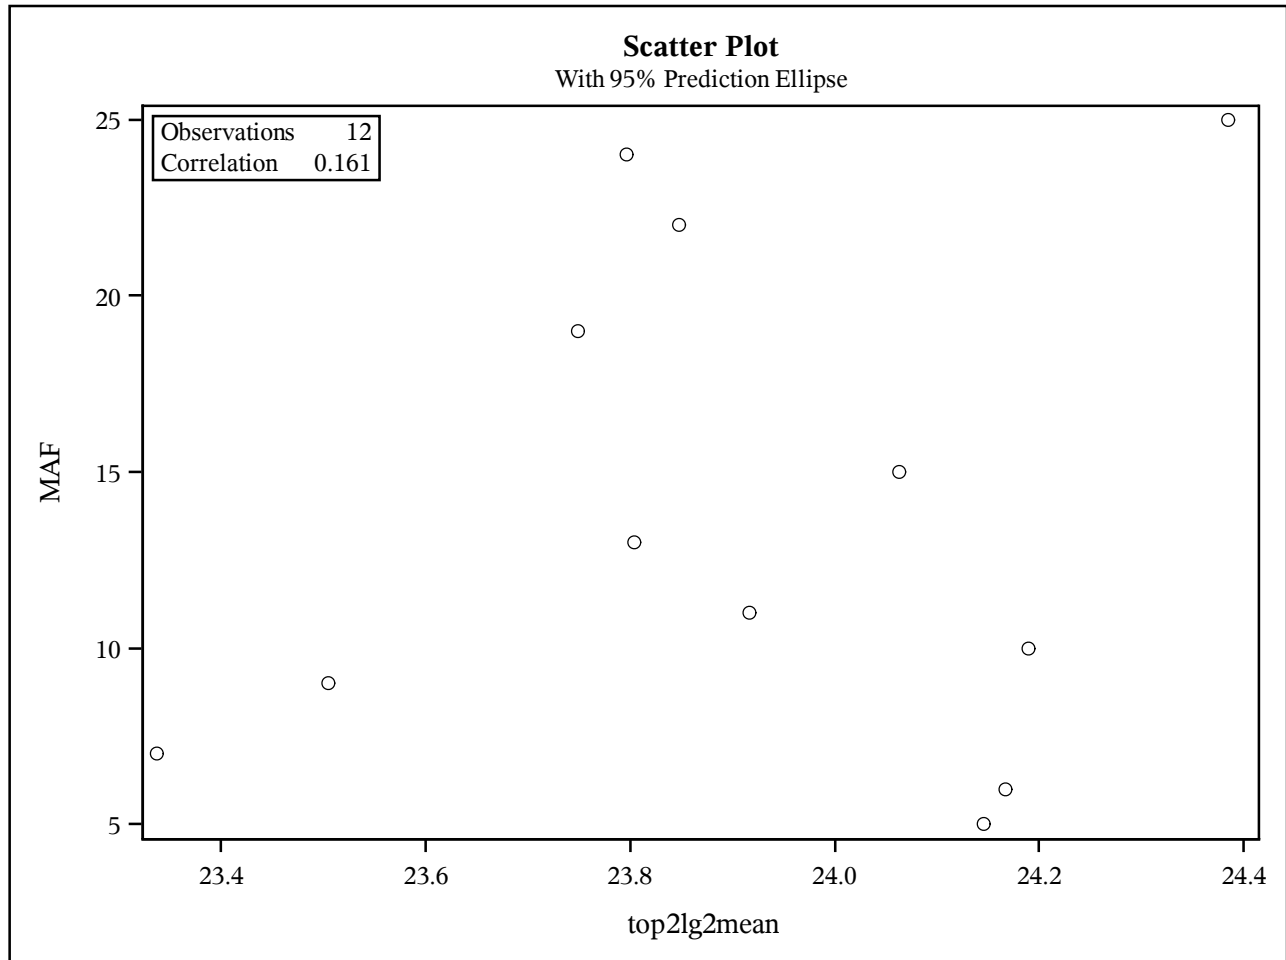

**Correlation C\_pooltop2lg2mean\_tp2 symbol MAF****The CORR Procedure**

Gene\_Symbol=APOH

2 Variables: top2lg2mean MAF

| Simple Statistics |    |          |         |           |          |          |
|-------------------|----|----------|---------|-----------|----------|----------|
| Variable          | N  | Mean     | Std Dev | Sum       | Minimum  | Maximum  |
| top2lg2mean       | 12 | 22.29174 | 0.23615 | 267.50086 | 21.90547 | 22.59521 |
| MAF               | 12 | 13.83333 | 7.10740 | 166.00000 | 5.00000  | 25.00000 |

| Pearson Correlation Coefficients, N = 12<br>Prob >  r  under H0: Rho=0 |                    |                    |
|------------------------------------------------------------------------|--------------------|--------------------|
|                                                                        | top2lg2mean        | MAF                |
| top2lg2mean                                                            | 1.00000            | -0.27647<br>0.3844 |
| MAF                                                                    | -0.27647<br>0.3844 | 1.00000            |

**Pearson Correlation Statistics (Fisher's z Transformation)**

| Variable    | With Variable | N  | Sample Correlation | Fisher's z | Bias Adjustment | Correlation Estimate | 95% Confidence Limits |          | p Value for H0:Rho=0 |
|-------------|---------------|----|--------------------|------------|-----------------|----------------------|-----------------------|----------|----------------------|
| top2lg2mean | MAF           | 12 | -0.27647           | -0.28385   | -0.01257        | -0.26482             | -0.728071             | 0.364472 | 0.3945               |

**Correlation C\_pooltop2lg2mean\_tp2 symbol MAF****The CORR Procedure**

Gene\_Symbol=APOH

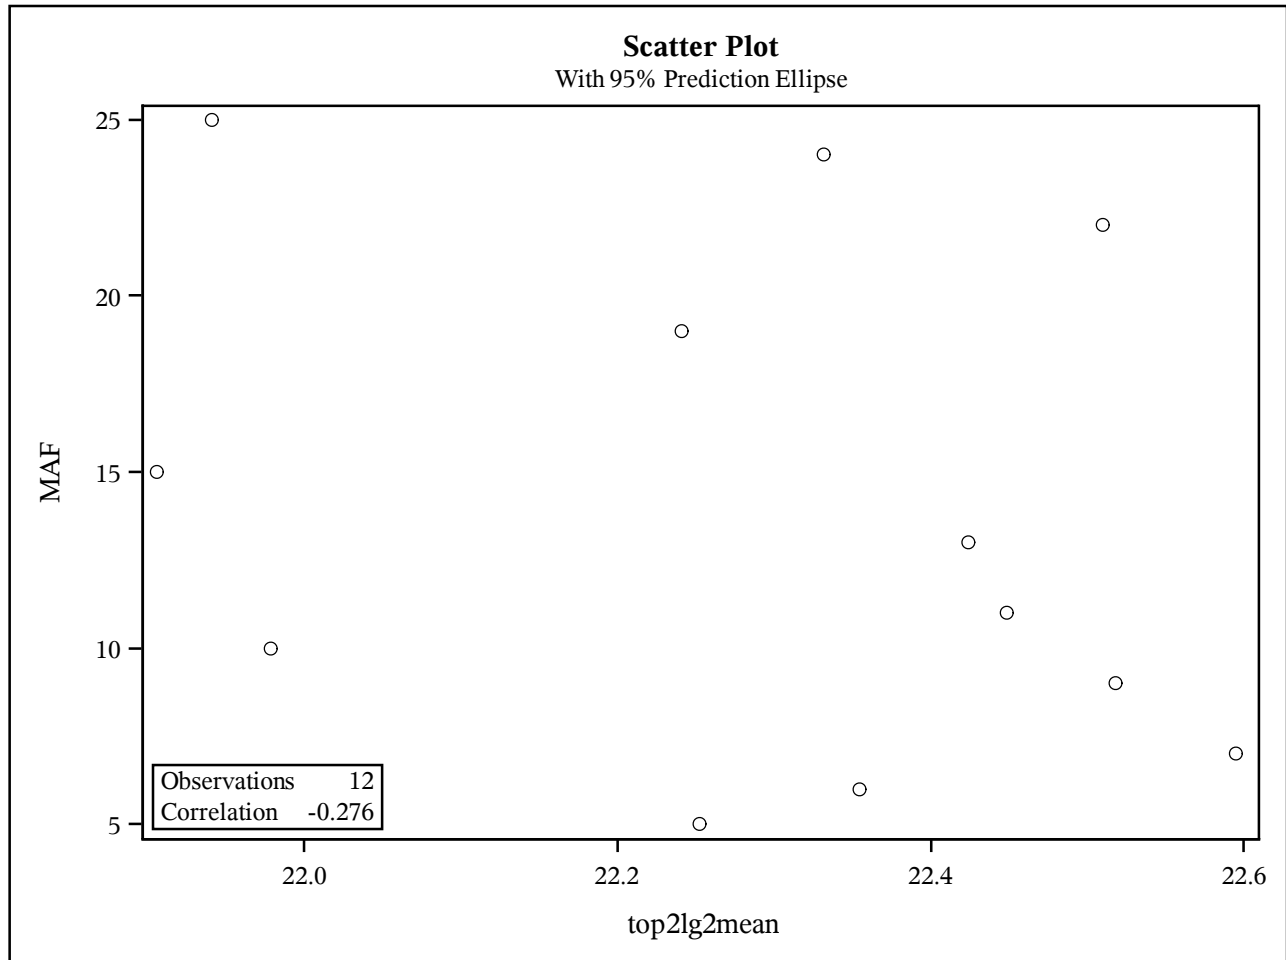

**Correlation C\_pooltop2lg2mean\_tp2 symbol MAF****The CORR Procedure**

Gene\_Symbol=APP

2 Variables: top2lg2mean MAF

| Simple Statistics |    |          |         |           |          |          |
|-------------------|----|----------|---------|-----------|----------|----------|
| Variable          | N  | Mean     | Std Dev | Sum       | Minimum  | Maximum  |
| top2lg2mean       | 12 | 22.01715 | 0.31782 | 264.20575 | 21.17932 | 22.35052 |
| MAF               | 12 | 13.83333 | 7.10740 | 166.00000 | 5.00000  | 25.00000 |

| Pearson Correlation Coefficients, N = 12<br>Prob >  r  under H0: Rho=0 |                   |                   |
|------------------------------------------------------------------------|-------------------|-------------------|
|                                                                        | top2lg2mean       | MAF               |
| top2lg2mean                                                            | 1.00000           | 0.31268<br>0.3224 |
| MAF                                                                    | 0.31268<br>0.3224 | 1.00000           |

**Pearson Correlation Statistics (Fisher's z Transformation)**

| Variable    | With Variable | N  | Sample Correlation | Fisher's z | Bias Adjustment | Correlation Estimate | 95% Confidence Limits |          | p Value for H0:Rho=0 |
|-------------|---------------|----|--------------------|------------|-----------------|----------------------|-----------------------|----------|----------------------|
| top2lg2mean | MAF           | 12 | 0.31268            | 0.32351    | 0.01421         | 0.29980              | -0.331064             | 0.745443 | 0.3318               |

**Correlation C\_pooltop2lg2mean\_tp2 symbol MAF****The CORR Procedure**

Gene\_Symbol=APP

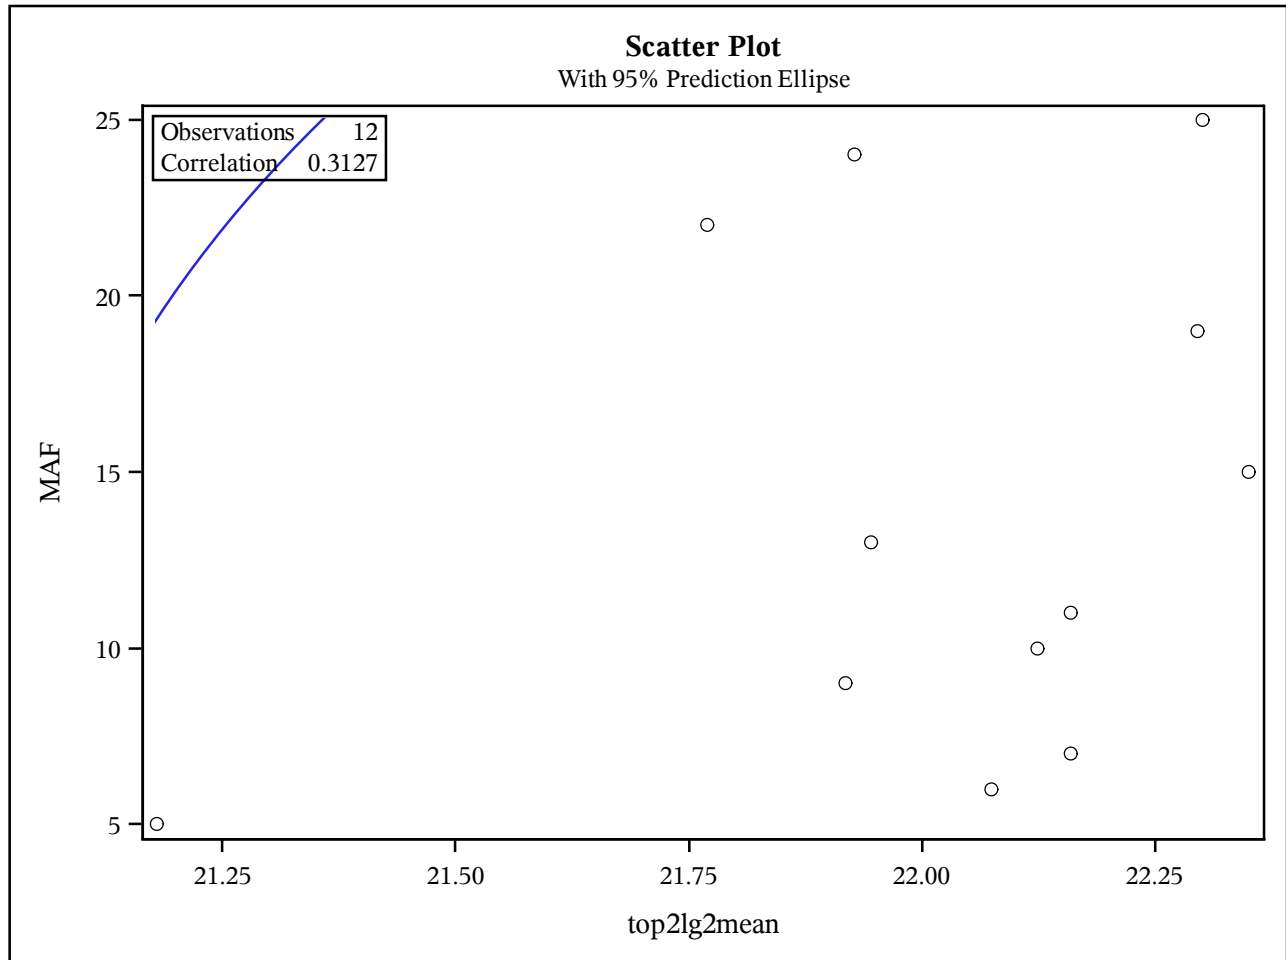

**Correlation C\_pooltop2lg2mean\_tp2 symbol MAF****The CORR Procedure**

Gene\_Symbol=AZGP1

2 Variables: top2lg2mean MAF

| Simple Statistics |    |          |         |           |          |          |
|-------------------|----|----------|---------|-----------|----------|----------|
| Variable          | N  | Mean     | Std Dev | Sum       | Minimum  | Maximum  |
| top2lg2mean       | 12 | 21.82737 | 0.10820 | 261.92846 | 21.65513 | 22.02868 |
| MAF               | 12 | 13.83333 | 7.10740 | 166.00000 | 5.00000  | 25.00000 |

| Pearson Correlation Coefficients, N = 12<br>Prob >  r  under H0: Rho=0 |                   |                   |
|------------------------------------------------------------------------|-------------------|-------------------|
|                                                                        | top2lg2mean       | MAF               |
| top2lg2mean                                                            | 1.00000           | 0.41986<br>0.1742 |
| MAF                                                                    | 0.41986<br>0.1742 | 1.00000           |

**Pearson Correlation Statistics (Fisher's z Transformation)**

| Variable    | With Variable | N  | Sample Correlation | Fisher's z | Bias Adjustment | Correlation Estimate | 95% Confidence Limits |          | p Value for H0:Rho=0 |
|-------------|---------------|----|--------------------|------------|-----------------|----------------------|-----------------------|----------|----------------------|
| top2lg2mean | MAF           | 12 | 0.41986            | 0.44752    | 0.01908         | 0.40401              | -0.221173             | 0.793849 | 0.1794               |

**Correlation C\_pooltop2lg2mean\_tp2 symbol MAF****The CORR Procedure**

Gene\_Symbol=AZGP1

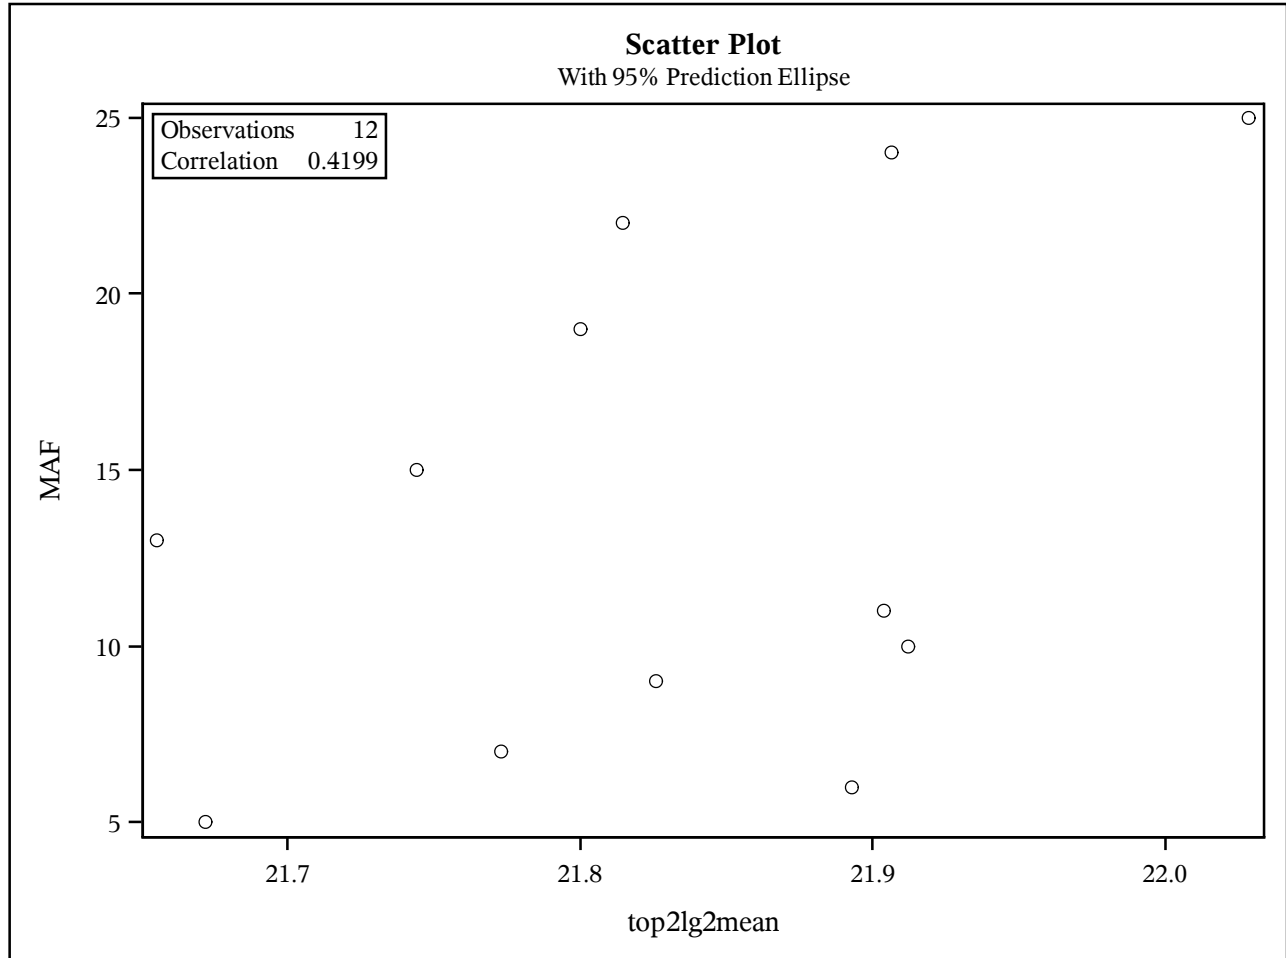



**Correlation C\_pooltop2lg2mean\_tp2 symbol MAF****The CORR Procedure**

Gene\_Symbol=B2M

2 Variables: top2lg2mean MAF

| Simple Statistics |    |          |         |           |          |          |
|-------------------|----|----------|---------|-----------|----------|----------|
| Variable          | N  | Mean     | Std Dev | Sum       | Minimum  | Maximum  |
| top2lg2mean       | 12 | 23.15555 | 0.71637 | 277.86666 | 22.13271 | 24.50394 |
| MAF               | 12 | 13.83333 | 7.10740 | 166.00000 | 5.00000  | 25.00000 |

| Pearson Correlation Coefficients, N = 12<br>Prob >  r  under H0: Rho=0 |                    |                    |
|------------------------------------------------------------------------|--------------------|--------------------|
|                                                                        | top2lg2mean        | MAF                |
| top2lg2mean                                                            | 1.00000            | -0.45162<br>0.1405 |
| MAF                                                                    | -0.45162<br>0.1405 | 1.00000            |

**Pearson Correlation Statistics (Fisher's z Transformation)**

| Variable    | With Variable | N  | Sample Correlation | Fisher's z | Bias Adjustment | Correlation Estimate | 95% Confidence Limits |          | p Value for H0:Rho=0 |
|-------------|---------------|----|--------------------|------------|-----------------|----------------------|-----------------------|----------|----------------------|
| top2lg2mean | MAF           | 12 | -0.45162           | -0.48673   | -0.02053        | -0.43513             | -0.807404             | 0.184963 | 0.1442               |

**Correlation  $C_{pool}$  top2lg2mean\_tp2 symbol MAF****The CORR Procedure**

Gene\_Symbol=B2M

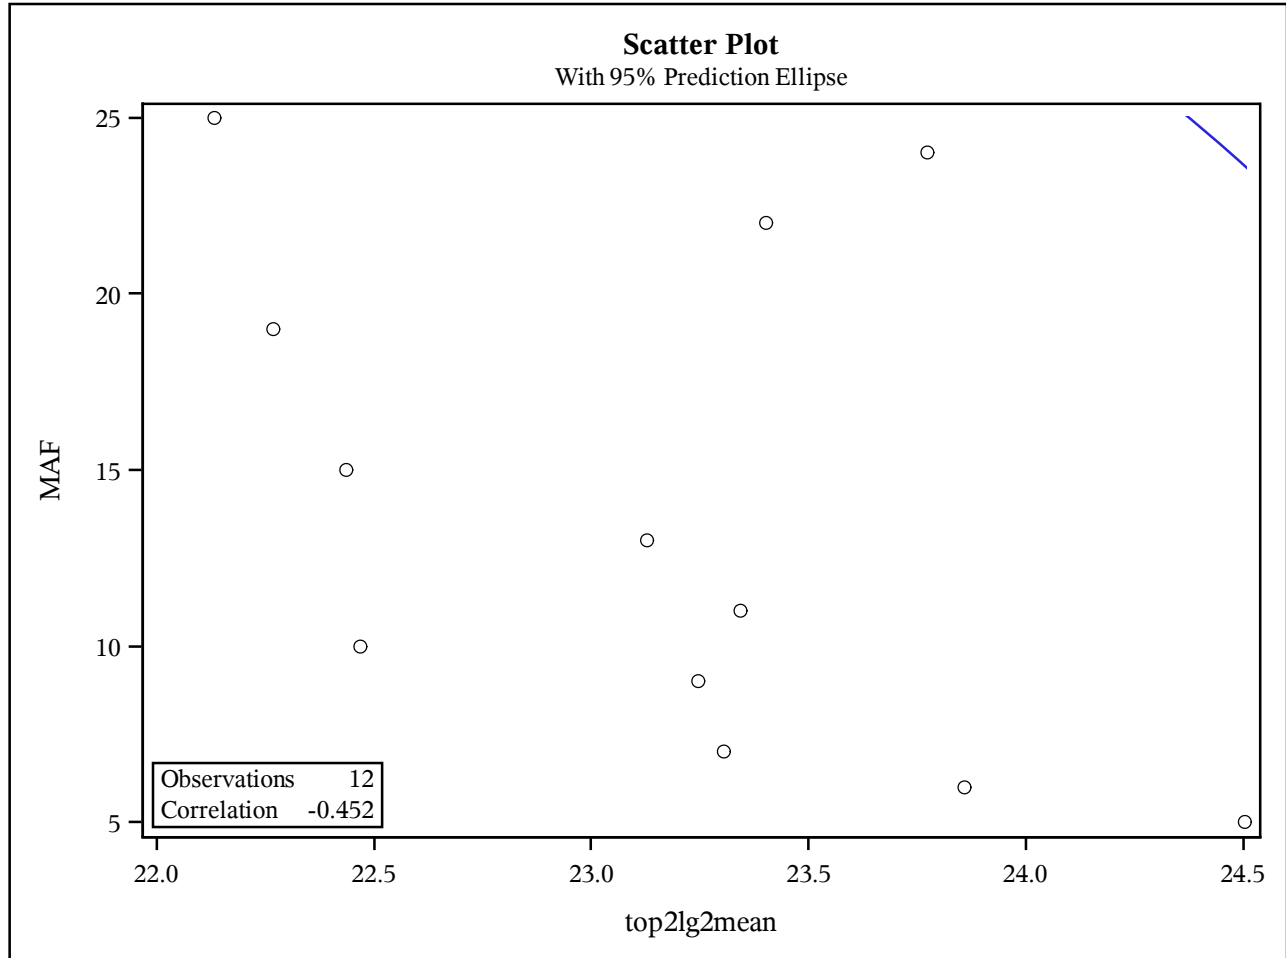

**Correlation C\_pooltop2lg2mean\_tp2 symbol MAF****The CORR Procedure**

Gene\_Symbol=B3GNT1

2 Variables: top2lg2mean MAF

| Simple Statistics |    |          |         |           |          |          |
|-------------------|----|----------|---------|-----------|----------|----------|
| Variable          | N  | Mean     | Std Dev | Sum       | Minimum  | Maximum  |
| top2lg2mean       | 12 | 21.33297 | 0.12604 | 255.99567 | 21.16096 | 21.59144 |
| MAF               | 12 | 13.83333 | 7.10740 | 166.00000 | 5.00000  | 25.00000 |

| Pearson Correlation Coefficients, N = 12<br>Prob >  r  under H0: Rho=0 |                   |                   |
|------------------------------------------------------------------------|-------------------|-------------------|
|                                                                        | top2lg2mean       | MAF               |
| top2lg2mean                                                            | 1.00000           | 0.23350<br>0.4651 |
| MAF                                                                    | 0.23350<br>0.4651 | 1.00000           |

**Pearson Correlation Statistics (Fisher's z Transformation)**

| Variable    | With Variable | N  | Sample Correlation | Fisher's z | Bias Adjustment | Correlation Estimate | 95% Confidence Limits |          | p Value for H0:Rho=0 |
|-------------|---------------|----|--------------------|------------|-----------------|----------------------|-----------------------|----------|----------------------|
| top2lg2mean | MAF           | 12 | 0.23350            | 0.23789    | 0.01061         | 0.22344              | -0.402013             | 0.706717 | 0.4754               |

**Correlation  $C_{pooltop2lg2mean\_tp2}$  symbol MAF****The CORR Procedure**

Gene\_Symbol=B3GNT1

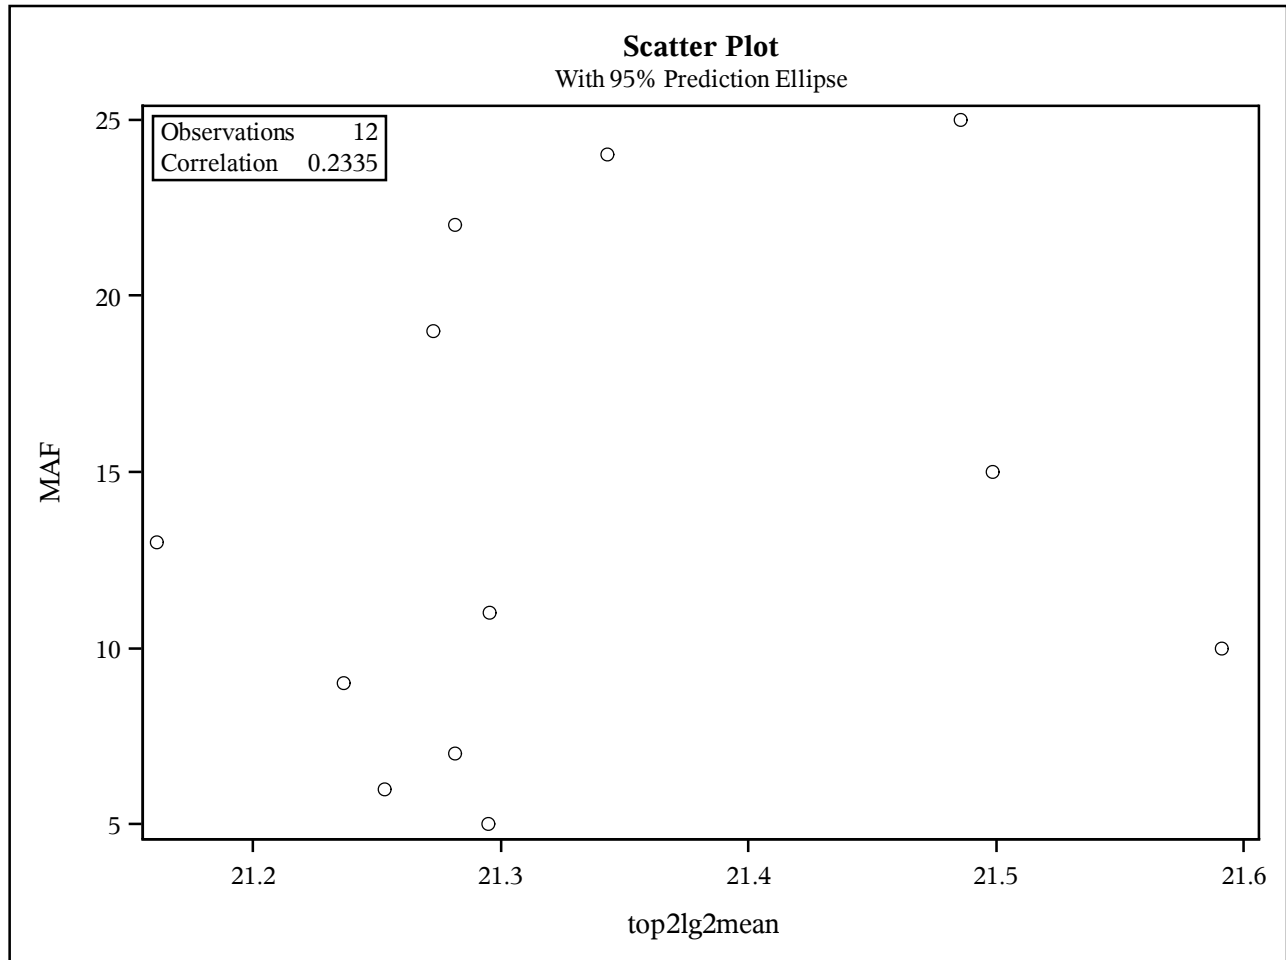

**Correlation C\_pooltop2lg2mean\_tp2 symbol MAF****The CORR Procedure**

Gene\_Symbol=BCAN

2 Variables: top2lg2mean MAF

| Simple Statistics |    |          |         |           |          |          |
|-------------------|----|----------|---------|-----------|----------|----------|
| Variable          | N  | Mean     | Std Dev | Sum       | Minimum  | Maximum  |
| top2lg2mean       | 12 | 19.52838 | 0.34793 | 234.34050 | 18.70516 | 20.06111 |
| MAF               | 12 | 13.83333 | 7.10740 | 166.00000 | 5.00000  | 25.00000 |

| Pearson Correlation Coefficients, N = 12<br>Prob >  r  under H0: Rho=0 |                   |                   |
|------------------------------------------------------------------------|-------------------|-------------------|
|                                                                        | top2lg2mean       | MAF               |
| top2lg2mean                                                            | 1.00000           | 0.38761<br>0.2132 |
| MAF                                                                    | 0.38761<br>0.2132 | 1.00000           |

**Pearson Correlation Statistics (Fisher's z Transformation)**

| Variable    | With Variable | N  | Sample Correlation | Fisher's z | Bias Adjustment | Correlation Estimate | 95% Confidence Limits |          | p Value for H0:Rho=0 |
|-------------|---------------|----|--------------------|------------|-----------------|----------------------|-----------------------|----------|----------------------|
| top2lg2mean | MAF           | 12 | 0.38761            | 0.40899    | 0.01762         | 0.37254              | -0.256123             | 0.779732 | 0.2198               |

**Correlation  $C_{pooltop2lg2mean\_tp2}$  symbol MAF****The CORR Procedure**

Gene\_Symbol=BCAN

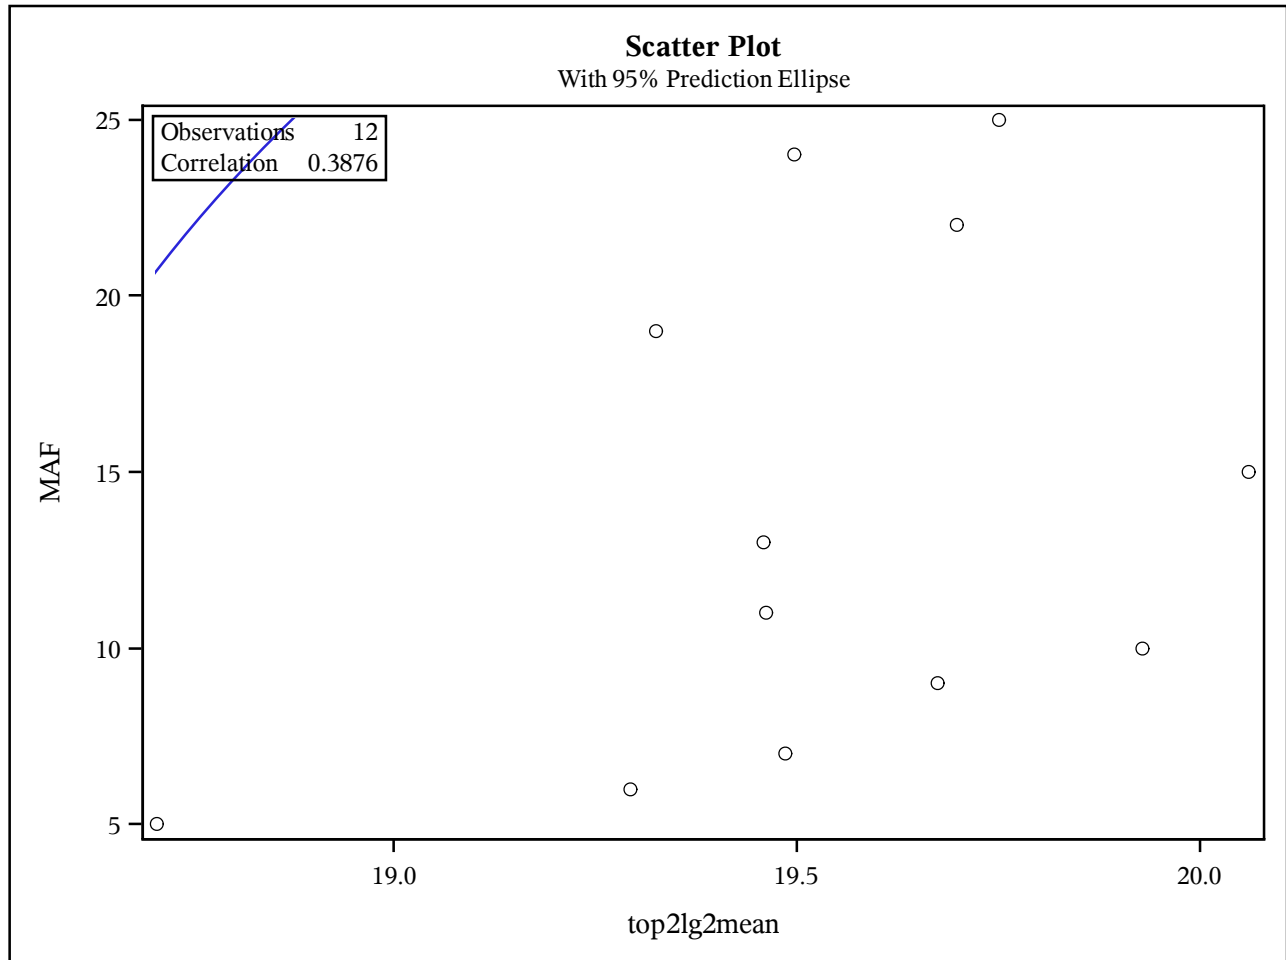

**Correlation C\_pooltop2lg2mean\_tp2 symbol MAF****The CORR Procedure**

Gene\_Symbol=C1S

2 Variables: top2lg2mean MAF

| Simple Statistics |    |          |         |           |          |          |
|-------------------|----|----------|---------|-----------|----------|----------|
| Variable          | N  | Mean     | Std Dev | Sum       | Minimum  | Maximum  |
| top2lg2mean       | 12 | 20.39884 | 0.20738 | 244.78613 | 20.08916 | 20.75487 |
| MAF               | 12 | 13.83333 | 7.10740 | 166.00000 | 5.00000  | 25.00000 |

| Pearson Correlation Coefficients, N = 12<br>Prob >  r  under H0: Rho=0 |                   |                   |
|------------------------------------------------------------------------|-------------------|-------------------|
|                                                                        | top2lg2mean       | MAF               |
| top2lg2mean                                                            | 1.00000           | 0.59823<br>0.0399 |
| MAF                                                                    | 0.59823<br>0.0399 | 1.00000           |

**Pearson Correlation Statistics (Fisher's z Transformation)**

| Variable    | With Variable | N  | Sample Correlation | Fisher's z | Bias Adjustment | Correlation Estimate | 95% Confidence Limits |          | p Value for H0:Rho=0 |
|-------------|---------------|----|--------------------|------------|-----------------|----------------------|-----------------------|----------|----------------------|
| top2lg2mean | MAF           | 12 | 0.59823            | 0.69038    | 0.02719         | 0.58048              | 0.009869              | 0.865914 | 0.0383               |

**Correlation C\_pooltop2lg2mean\_tp2 symbol MAF**

**The CORR Procedure**

Gene\_Symbol=C1S

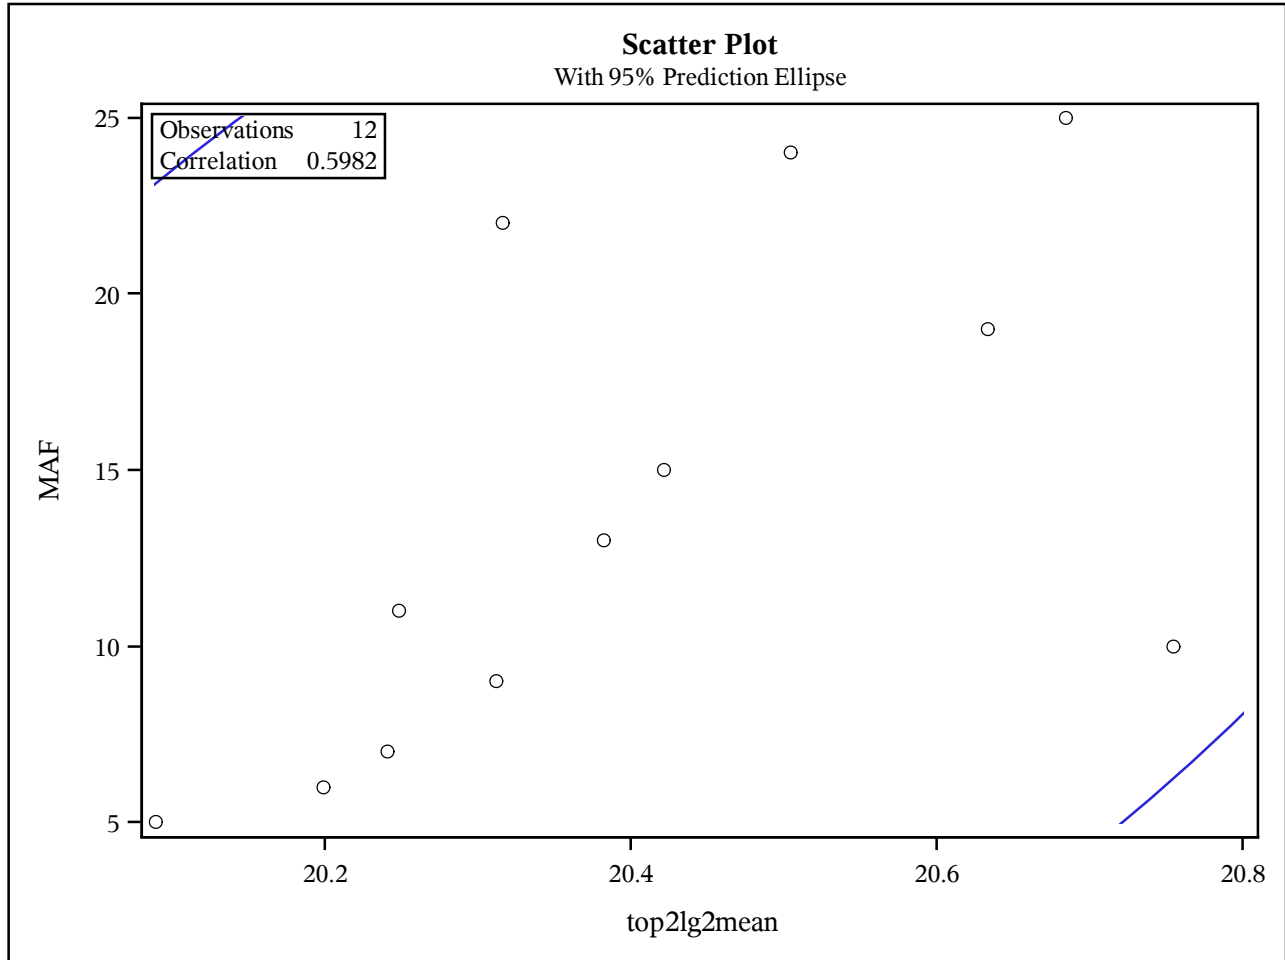



**Correlation C\_pooltop2lg2mean\_tp2 symbol MAF****The CORR Procedure**

Gene\_Symbol=C3

2 Variables: top2lg2mean MAF

| Simple Statistics |    |          |         |           |          |          |
|-------------------|----|----------|---------|-----------|----------|----------|
| Variable          | N  | Mean     | Std Dev | Sum       | Minimum  | Maximum  |
| top2lg2mean       | 12 | 23.64879 | 0.24812 | 283.78550 | 23.13520 | 24.02660 |
| MAF               | 12 | 13.83333 | 7.10740 | 166.00000 | 5.00000  | 25.00000 |

| Pearson Correlation Coefficients, N = 12<br>Prob >  r  under H0: Rho=0 |                    |                    |
|------------------------------------------------------------------------|--------------------|--------------------|
|                                                                        | top2lg2mean        | MAF                |
| top2lg2mean                                                            | 1.00000            | -0.23343<br>0.4653 |
| MAF                                                                    | -0.23343<br>0.4653 | 1.00000            |

**Pearson Correlation Statistics (Fisher's z Transformation)**

| Variable    | With Variable | N  | Sample Correlation | Fisher's z | Bias Adjustment | Correlation Estimate | 95% Confidence Limits |          | p Value for H0:Rho=0 |
|-------------|---------------|----|--------------------|------------|-----------------|----------------------|-----------------------|----------|----------------------|
| top2lg2mean | MAF           | 12 | -0.23343           | -0.23781   | -0.01061        | -0.22337             | -0.706681             | 0.402073 | 0.4756               |

**Correlation C\_pooltop2lg2mean\_tp2 symbol MAF****The CORR Procedure**

Gene\_Symbol=C3

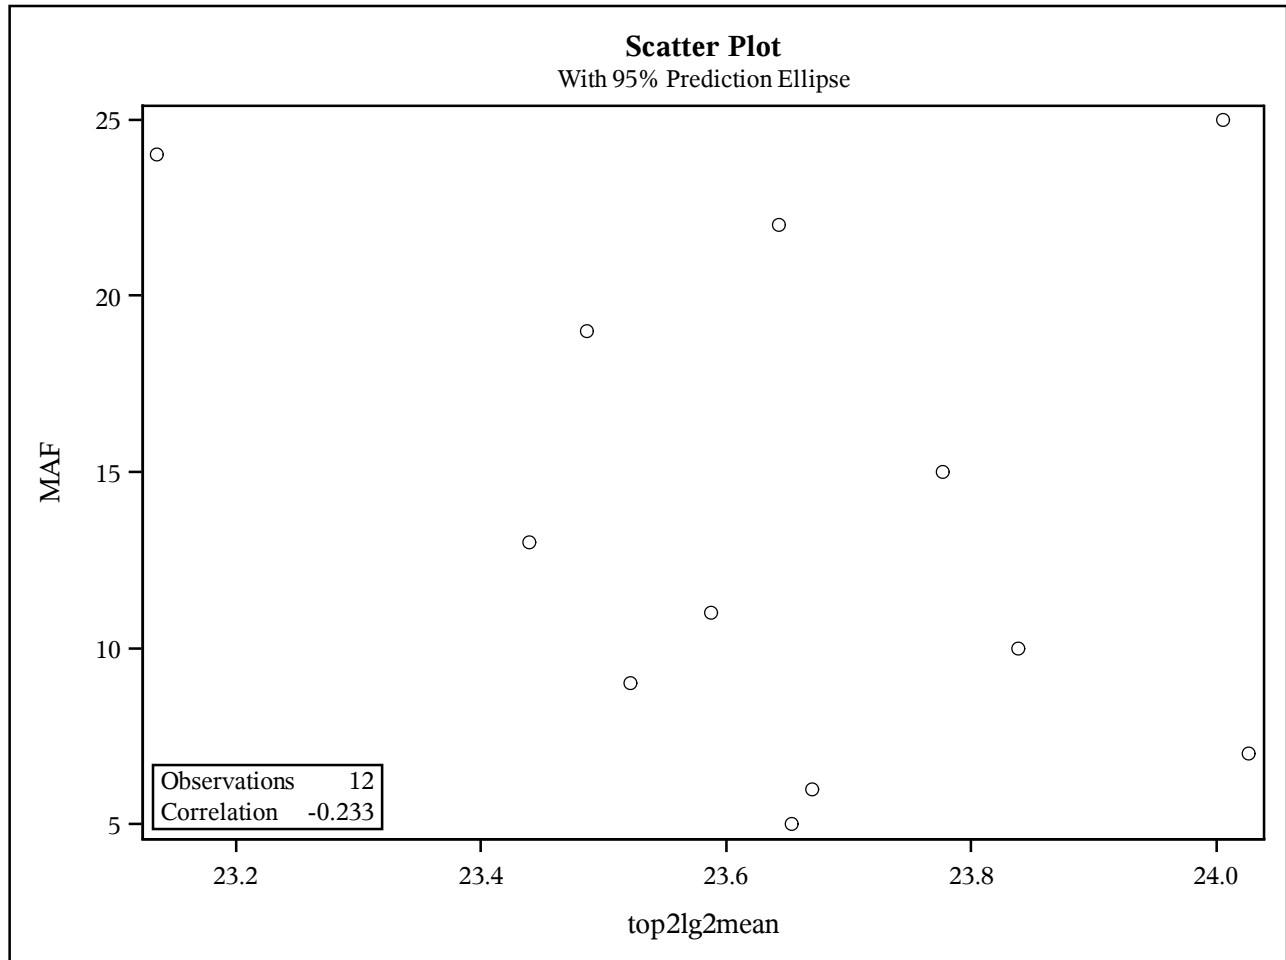

**Correlation C\_pooltop2lg2mean\_tp2 symbol MAF****The CORR Procedure**

Gene\_Symbol=C4A-C4B

2 Variables: top2lg2mean MAF

| Simple Statistics |    |          |         |           |          |          |
|-------------------|----|----------|---------|-----------|----------|----------|
| Variable          | N  | Mean     | Std Dev | Sum       | Minimum  | Maximum  |
| top2lg2mean       | 12 | 23.25294 | 0.43429 | 279.03527 | 22.17556 | 23.98024 |
| MAF               | 12 | 13.83333 | 7.10740 | 166.00000 | 5.00000  | 25.00000 |

| Pearson Correlation Coefficients, N = 12<br>Prob >  r  under H0: Rho=0 |                   |                   |
|------------------------------------------------------------------------|-------------------|-------------------|
|                                                                        | top2lg2mean       | MAF               |
| top2lg2mean                                                            | 1.00000           | 0.07725<br>0.8114 |
| MAF                                                                    | 0.07725<br>0.8114 | 1.00000           |

**Pearson Correlation Statistics (Fisher's z Transformation)**

| Variable    | With Variable | N  | Sample Correlation | Fisher's z | Bias Adjustment | Correlation Estimate | 95% Confidence Limits |          | p Value for H0:Rho=0 |
|-------------|---------------|----|--------------------|------------|-----------------|----------------------|-----------------------|----------|----------------------|
| top2lg2mean | MAF           | 12 | 0.07725            | 0.07740    | 0.00351         | 0.07376              | -0.522252             | 0.621356 | 0.8164               |

**Correlation C\_pooltop2lg2mean\_tp2 symbol MAF**

**The CORR Procedure**

Gene\_Symbol=C4A-C4B

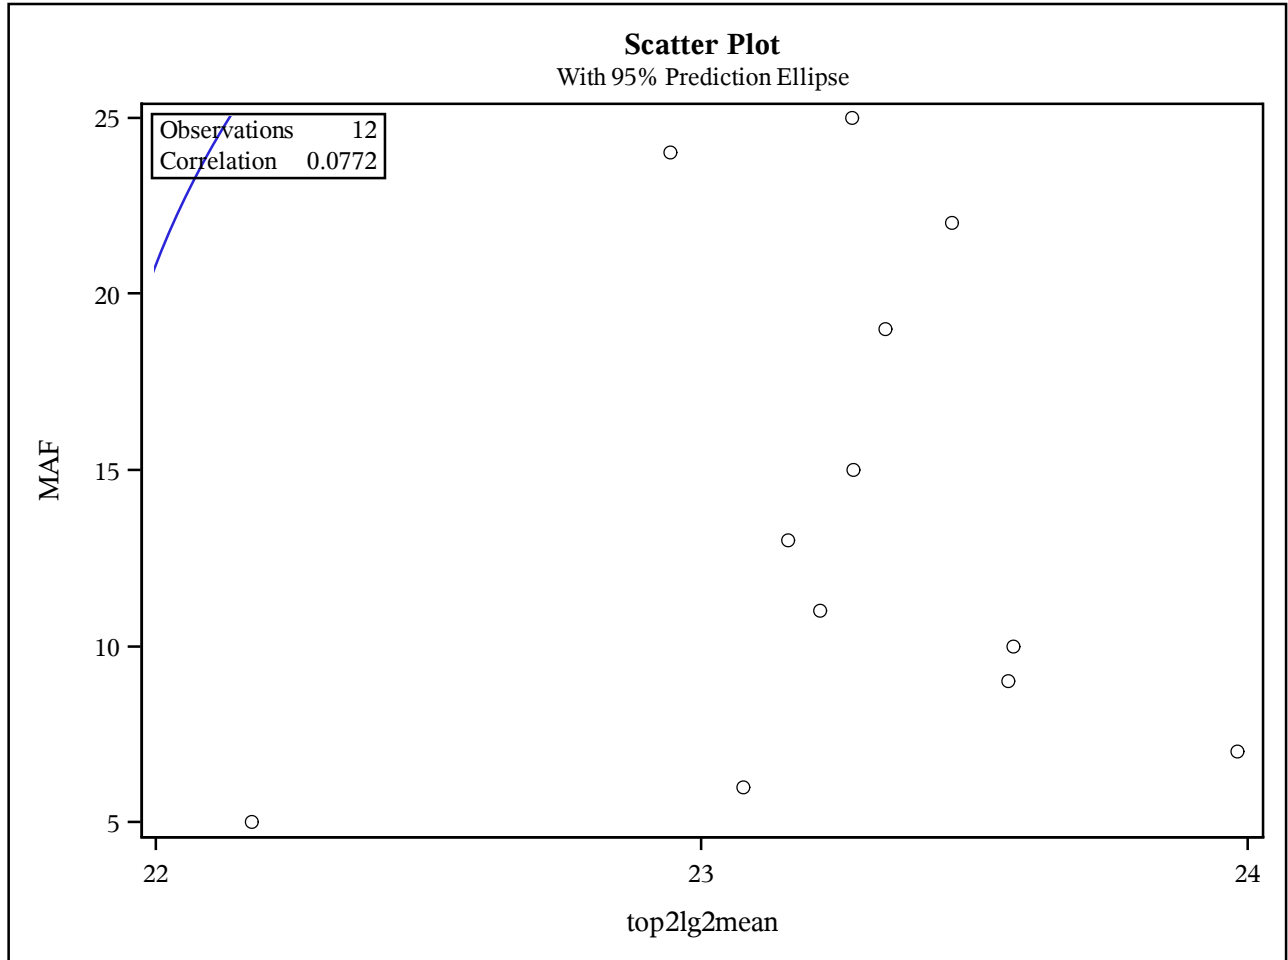

**Correlation C\_pooltop2lg2mean\_tp2 symbol MAF****The CORR Procedure**

Gene\_Symbol=C7

2 Variables: top2lg2mean MAF

| Simple Statistics |    |          |         |           |          |          |
|-------------------|----|----------|---------|-----------|----------|----------|
| Variable          | N  | Mean     | Std Dev | Sum       | Minimum  | Maximum  |
| top2lg2mean       | 12 | 19.42969 | 0.32606 | 233.15628 | 18.96587 | 19.88187 |
| MAF               | 12 | 13.83333 | 7.10740 | 166.00000 | 5.00000  | 25.00000 |

| Pearson Correlation Coefficients, N = 12<br>Prob >  r  under H0: Rho=0 |                   |                   |
|------------------------------------------------------------------------|-------------------|-------------------|
|                                                                        | top2lg2mean       | MAF               |
| top2lg2mean                                                            | 1.00000           | 0.14164<br>0.6606 |
| MAF                                                                    | 0.14164<br>0.6606 | 1.00000           |

**Pearson Correlation Statistics (Fisher's z Transformation)**

| Variable    | With Variable | N  | Sample Correlation | Fisher's z | Bias Adjustment | Correlation Estimate | 95% Confidence Limits |          | p Value for H0:Rho=0 |
|-------------|---------------|----|--------------------|------------|-----------------|----------------------|-----------------------|----------|----------------------|
| top2lg2mean | MAF           | 12 | 0.14164            | 0.14259    | 0.00644         | 0.13532              | -0.475509             | 0.658113 | 0.6688               |

**Correlation C\_pooltop2lg2mean\_tp2 symbol MAF**

**The CORR Procedure**

Gene\_Symbol=C7

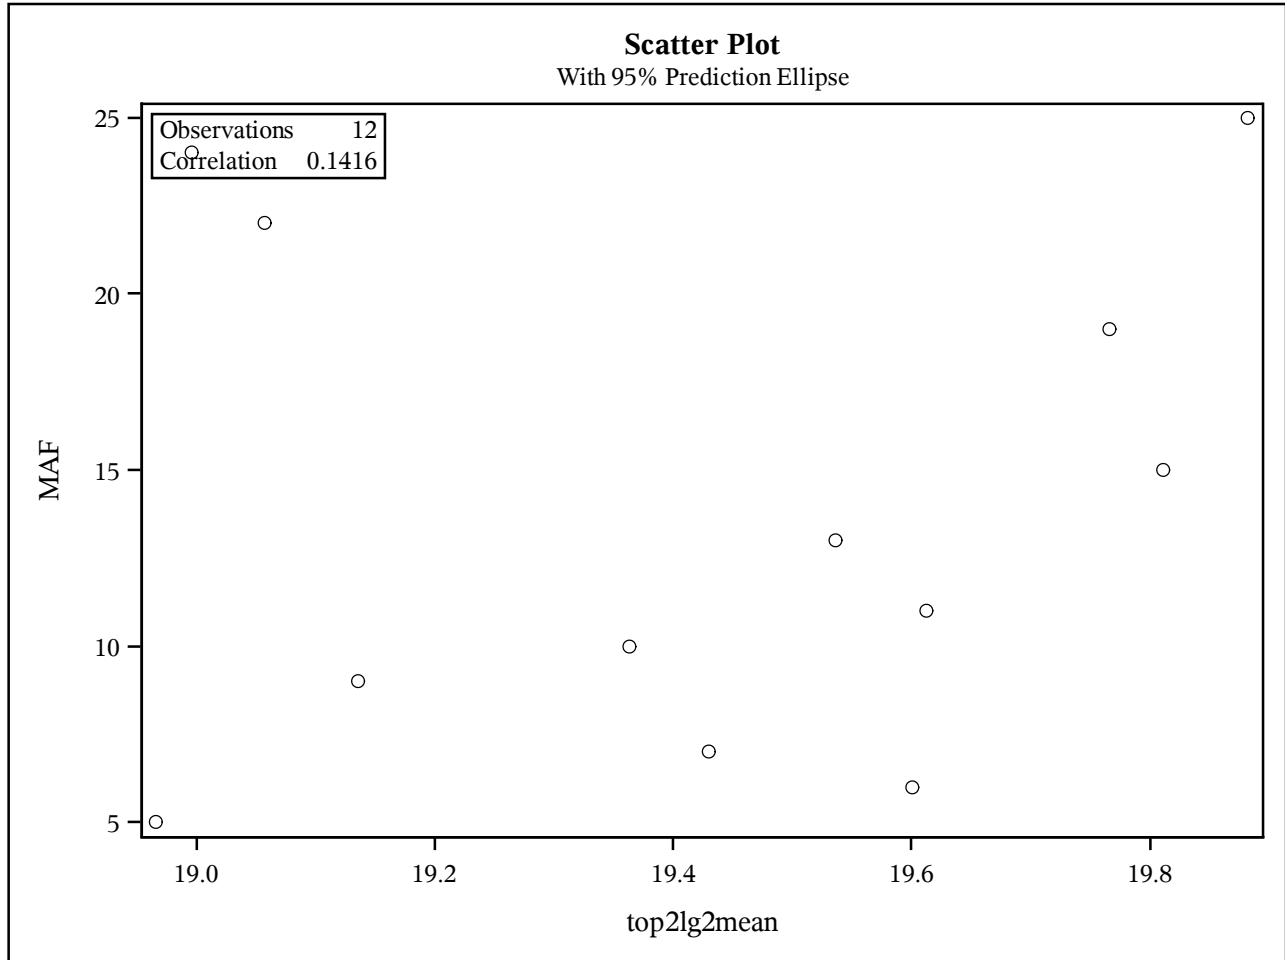

**Correlation C\_pooltop2lg2mean\_tp2 symbol MAF****The CORR Procedure**

Gene\_Symbol=CD14

2 Variables: top2lg2mean MAF

| Simple Statistics |    |          |         |           |          |          |
|-------------------|----|----------|---------|-----------|----------|----------|
| Variable          | N  | Mean     | Std Dev | Sum       | Minimum  | Maximum  |
| top2lg2mean       | 12 | 21.00887 | 0.30714 | 252.10641 | 20.57639 | 21.50118 |
| MAF               | 12 | 13.83333 | 7.10740 | 166.00000 | 5.00000  | 25.00000 |

| Pearson Correlation Coefficients, N = 12<br>Prob >  r  under H0: Rho=0 |                   |                   |
|------------------------------------------------------------------------|-------------------|-------------------|
|                                                                        | top2lg2mean       | MAF               |
| top2lg2mean                                                            | 1.00000           | 0.32389<br>0.3044 |
| MAF                                                                    | 0.32389<br>0.3044 | 1.00000           |

**Pearson Correlation Statistics (Fisher's z Transformation)**

| Variable    | With Variable | N  | Sample Correlation | Fisher's z | Bias Adjustment | Correlation Estimate | 95% Confidence Limits |          | p Value for H0:Rho=0 |
|-------------|---------------|----|--------------------|------------|-----------------|----------------------|-----------------------|----------|----------------------|
| top2lg2mean | MAF           | 12 | 0.32389            | 0.33598    | 0.01472         | 0.31065              | -0.320371             | 0.750711 | 0.3135               |

**Correlation  $C_{pool}$  top2lg2mean\_tp2 symbol MAF****The CORR Procedure**

Gene\_Symbol=CD14

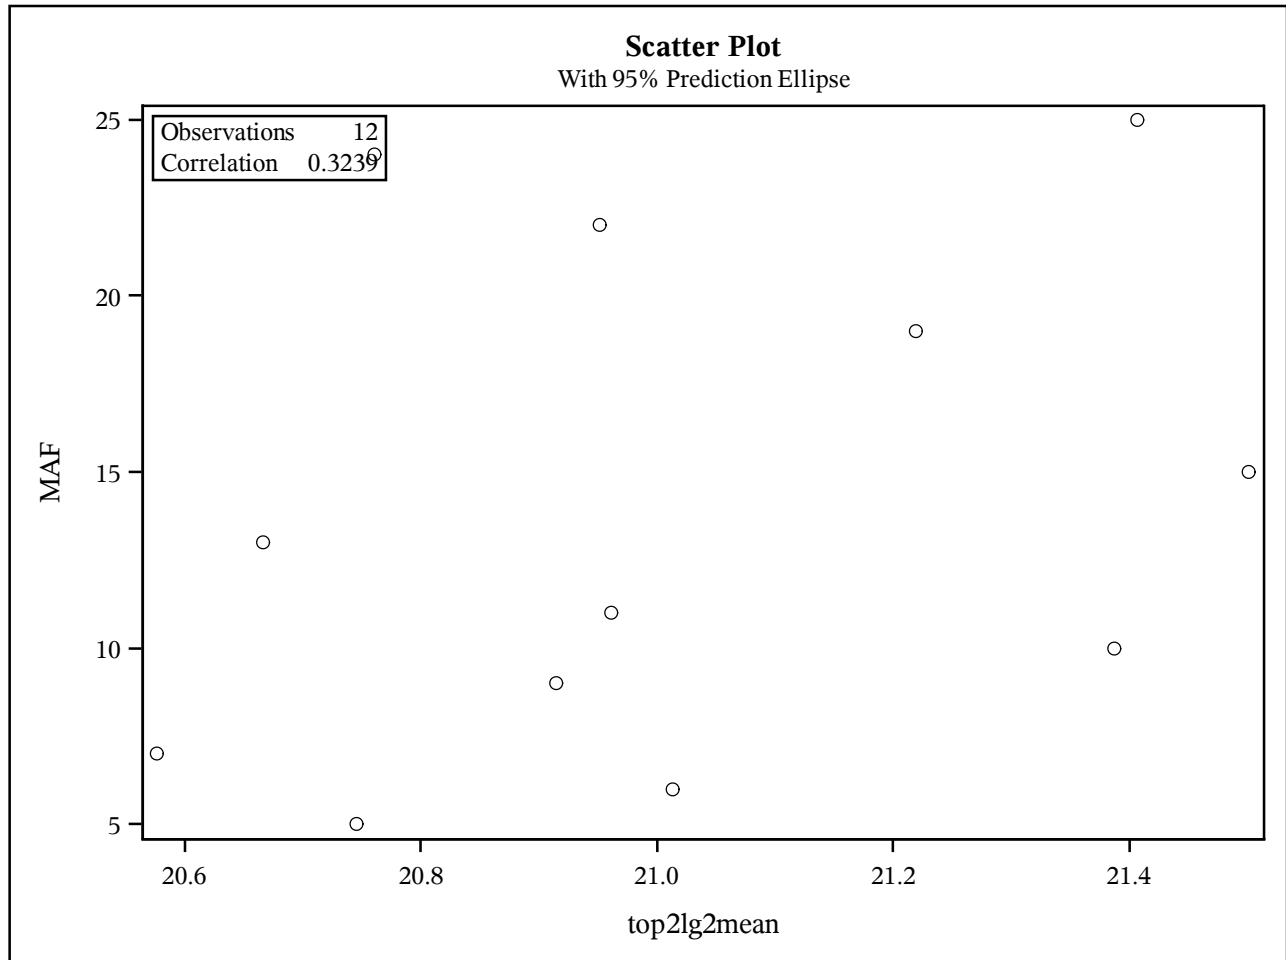



**Correlation C\_pooltop2lg2mean\_tp2 symbol MAF****The CORR Procedure**

Gene\_Symbol=CD59

2 Variables: top2lg2mean MAF

| Simple Statistics |    |          |         |           |          |          |
|-------------------|----|----------|---------|-----------|----------|----------|
| Variable          | N  | Mean     | Std Dev | Sum       | Minimum  | Maximum  |
| top2lg2mean       | 12 | 20.70554 | 0.36595 | 248.46650 | 19.73407 | 21.12204 |
| MAF               | 12 | 13.83333 | 7.10740 | 166.00000 | 5.00000  | 25.00000 |

| Pearson Correlation Coefficients, N = 12<br>Prob >  r  under H0: Rho=0 |                   |                   |
|------------------------------------------------------------------------|-------------------|-------------------|
|                                                                        | top2lg2mean       | MAF               |
| top2lg2mean                                                            | 1.00000           | 0.53446<br>0.0734 |
| MAF                                                                    | 0.53446<br>0.0734 | 1.00000           |

| Pearson Correlation Statistics (Fisher's z Transformation) |               |    |                    |            |                 |                      |                       |          |                      |
|------------------------------------------------------------|---------------|----|--------------------|------------|-----------------|----------------------|-----------------------|----------|----------------------|
| Variable                                                   | With Variable | N  | Sample Correlation | Fisher's z | Bias Adjustment | Correlation Estimate | 95% Confidence Limits |          | p Value for H0:Rho=0 |
| top2lg2mean                                                | MAF           | 12 | 0.53446            | 0.59636    | 0.02429         | 0.51688              | -0.081073             | 0.841237 | 0.0736               |

**Correlation C\_pooltop2lg2mean\_tp2 symbol MAF**

**The CORR Procedure**

Gene\_Symbol=CD59

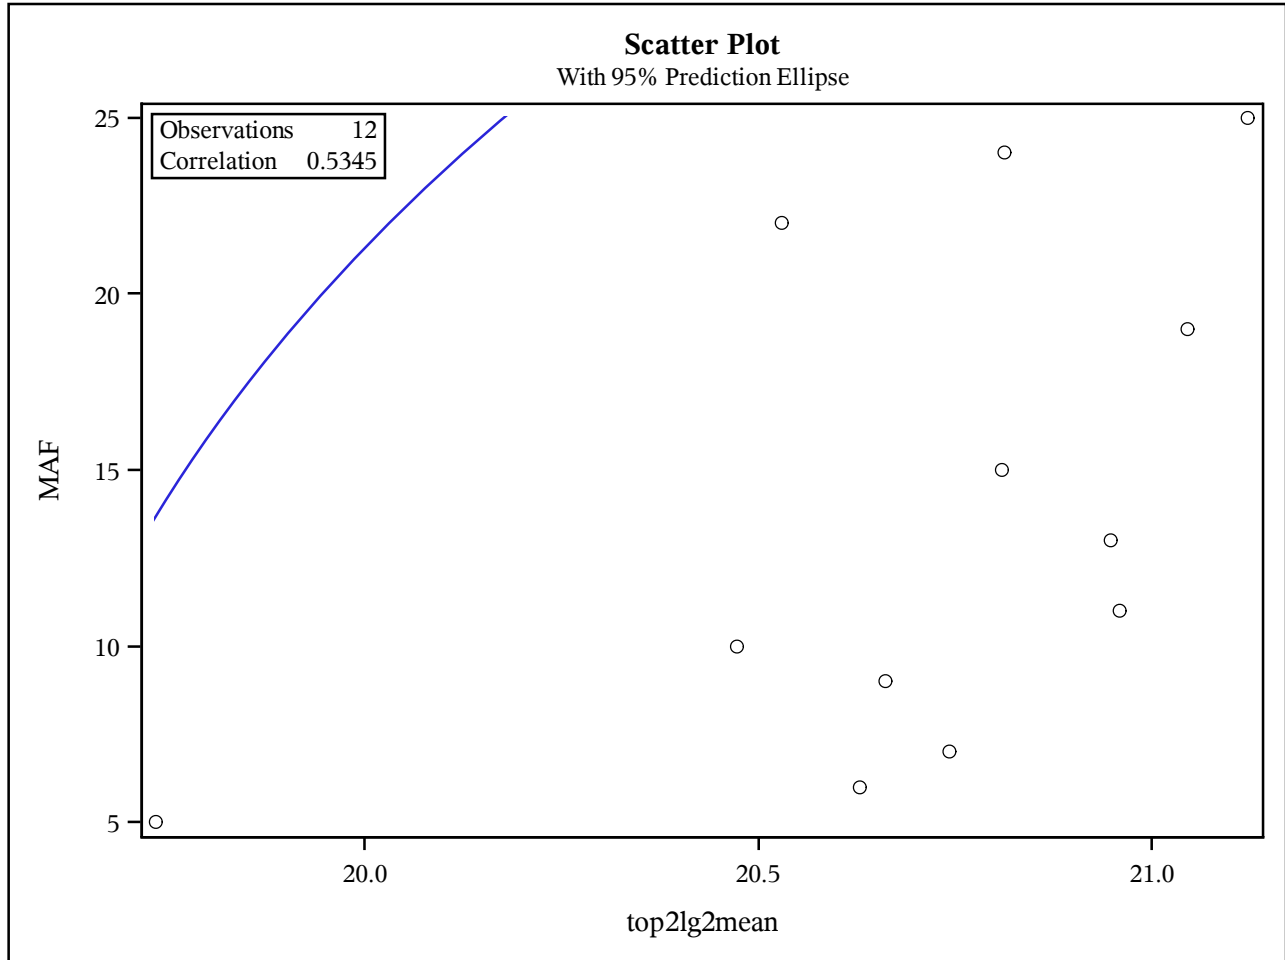

**Correlation C\_pooltop2lg2mean\_tp2 symbol MAF****The CORR Procedure**

Gene\_Symbol=CFB

2 Variables: top2lg2mean MAF

| Simple Statistics |    |          |         |           |          |          |
|-------------------|----|----------|---------|-----------|----------|----------|
| Variable          | N  | Mean     | Std Dev | Sum       | Minimum  | Maximum  |
| top2lg2mean       | 12 | 20.10731 | 0.36953 | 241.28777 | 19.43929 | 20.88184 |
| MAF               | 12 | 13.83333 | 7.10740 | 166.00000 | 5.00000  | 25.00000 |

| Pearson Correlation Coefficients, N = 12<br>Prob >  r  under H0: Rho=0 |                    |                    |
|------------------------------------------------------------------------|--------------------|--------------------|
|                                                                        | top2lg2mean        | MAF                |
| top2lg2mean                                                            | 1.00000            | -0.18351<br>0.5681 |
| MAF                                                                    | -0.18351<br>0.5681 | 1.00000            |

**Pearson Correlation Statistics (Fisher's z Transformation)**

| Variable    | With Variable | N  | Sample Correlation | Fisher's z | Bias Adjustment | Correlation Estimate | 95% Confidence Limits |          | p Value for H0:Rho=0 |
|-------------|---------------|----|--------------------|------------|-----------------|----------------------|-----------------------|----------|----------------------|
| top2lg2mean | MAF           | 12 | -0.18351           | -0.18561   | -0.00834        | -0.17544             | -0.680795             | 0.443073 | 0.5776               |

**Correlation C\_pooltop2lg2mean\_tp2 symbol MAF****The CORR Procedure**

Gene\_Symbol=CFB

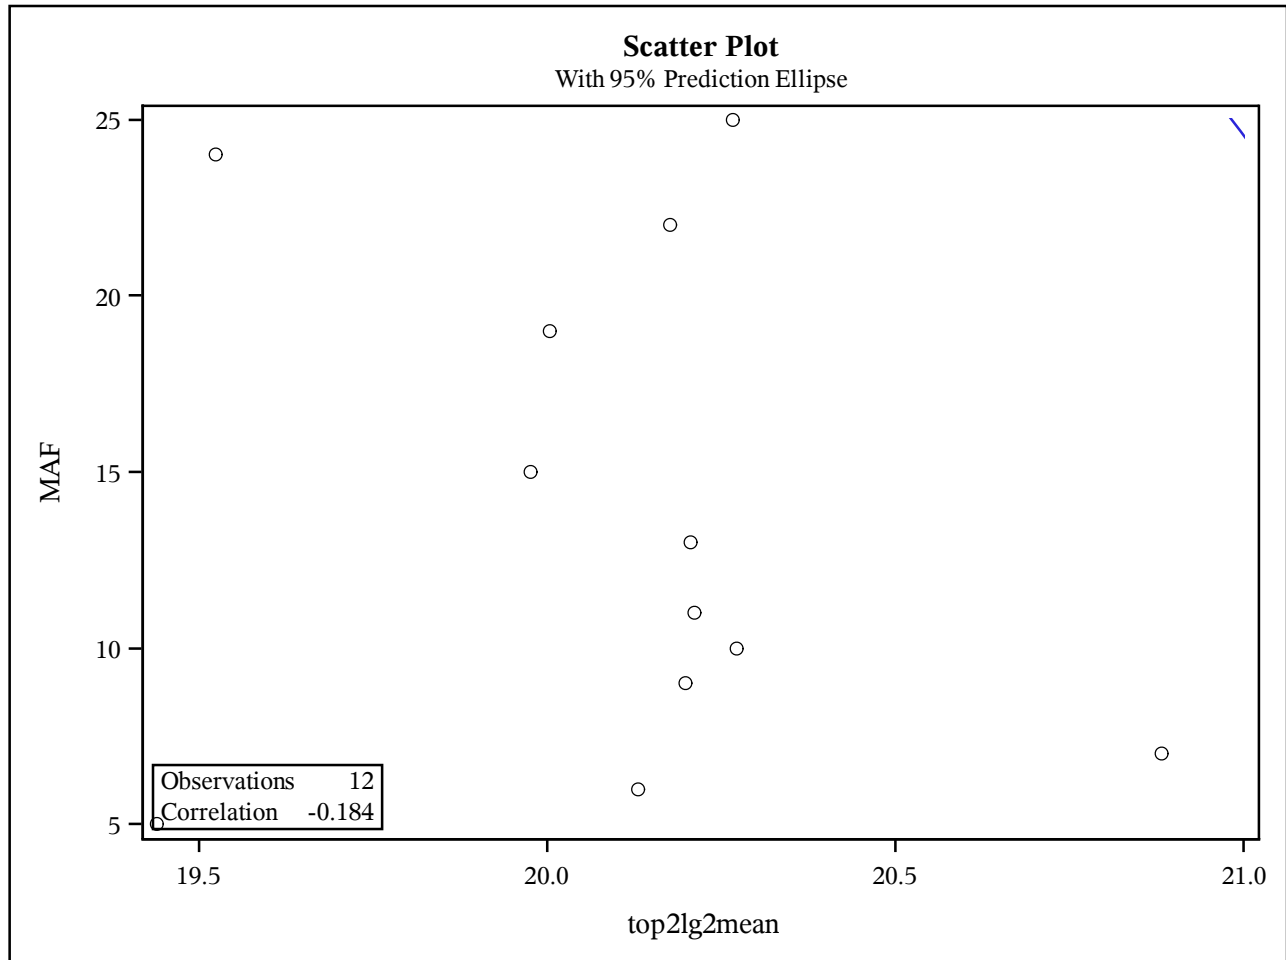

**Correlation C\_pooltop2lg2mean\_tp2 symbol MAF****The CORR Procedure**

Gene\_Symbol=CFH

2 Variables: top2lg2mean MAF

| Simple Statistics |    |          |         |           |          |          |
|-------------------|----|----------|---------|-----------|----------|----------|
| Variable          | N  | Mean     | Std Dev | Sum       | Minimum  | Maximum  |
| top2lg2mean       | 12 | 20.28654 | 0.23510 | 243.43848 | 19.71553 | 20.55740 |
| MAF               | 12 | 13.83333 | 7.10740 | 166.00000 | 5.00000  | 25.00000 |

| Pearson Correlation Coefficients, N = 12<br>Prob >  r  under H0: Rho=0 |                   |                   |
|------------------------------------------------------------------------|-------------------|-------------------|
|                                                                        | top2lg2mean       | MAF               |
| top2lg2mean                                                            | 1.00000           | 0.48744<br>0.1080 |
| MAF                                                                    | 0.48744<br>0.1080 | 1.00000           |

**Pearson Correlation Statistics (Fisher's z Transformation)**

| Variable    | With Variable | N  | Sample Correlation | Fisher's z | Bias Adjustment | Correlation Estimate | 95% Confidence Limits |          | p Value for H0:Rho=0 |
|-------------|---------------|----|--------------------|------------|-----------------|----------------------|-----------------------|----------|----------------------|
| top2lg2mean | MAF           | 12 | 0.48744            | 0.53269    | 0.02216         | 0.47036              | -0.141821             | 0.822294 | 0.1100               |

**Correlation C\_pooltop2lg2mean\_tp2 symbol MAF****The CORR Procedure**

Gene\_Symbol=CFH

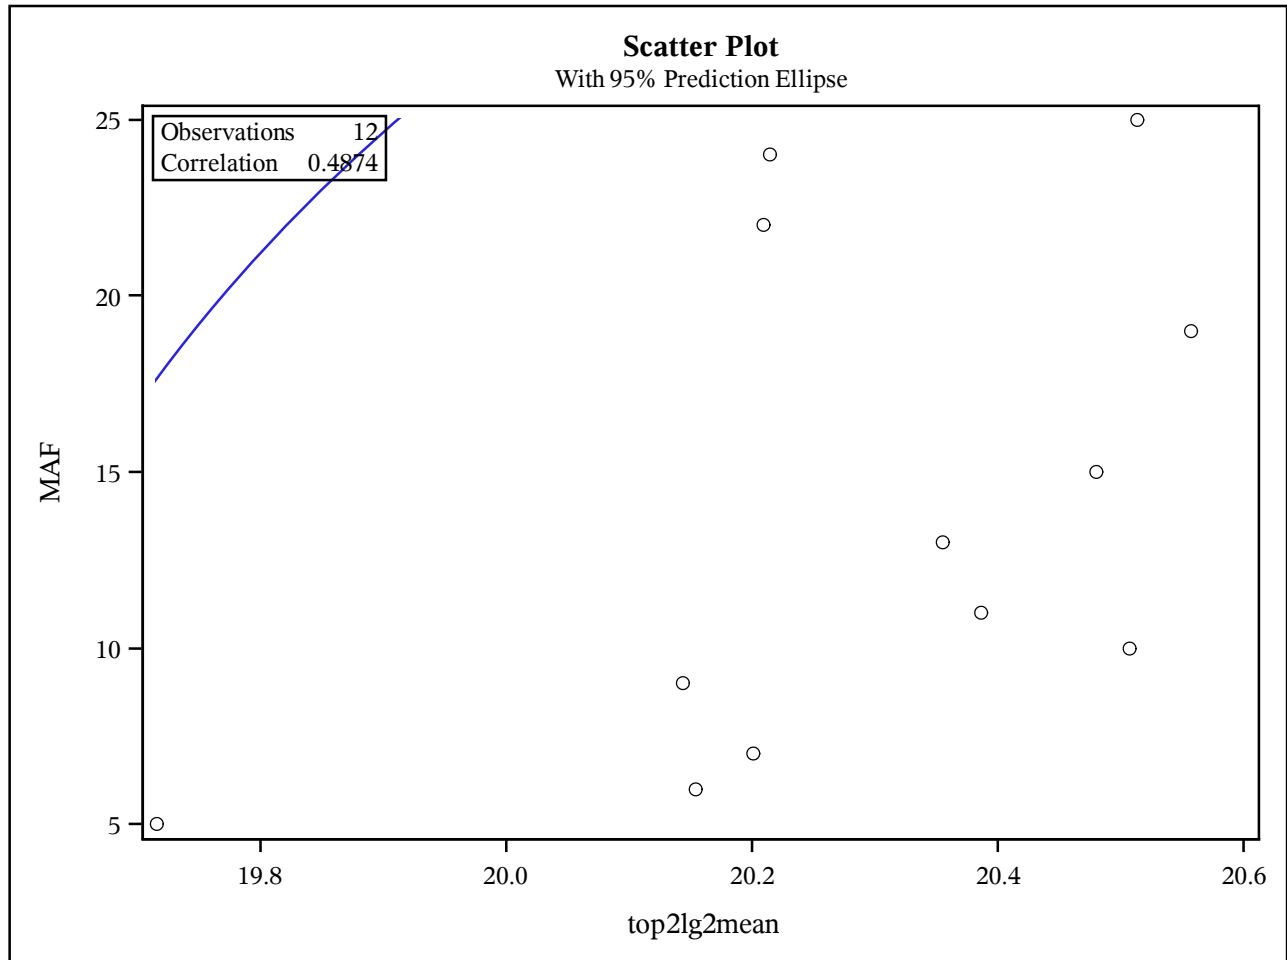

**Correlation C\_pooltop2lg2mean\_tp2 symbol MAF****The CORR Procedure**

Gene\_Symbol=CHGA

2 Variables: top2lg2mean MAF

| Simple Statistics |    |          |         |           |          |          |
|-------------------|----|----------|---------|-----------|----------|----------|
| Variable          | N  | Mean     | Std Dev | Sum       | Minimum  | Maximum  |
| top2lg2mean       | 12 | 22.61559 | 0.18595 | 271.38709 | 22.31285 | 22.88093 |
| MAF               | 12 | 13.83333 | 7.10740 | 166.00000 | 5.00000  | 25.00000 |

| Pearson Correlation Coefficients, N = 12<br>Prob >  r  under H0: Rho=0 |                   |                   |
|------------------------------------------------------------------------|-------------------|-------------------|
|                                                                        | top2lg2mean       | MAF               |
| top2lg2mean                                                            | 1.00000           | 0.26584<br>0.4036 |
| MAF                                                                    | 0.26584<br>0.4036 | 1.00000           |

**Pearson Correlation Statistics (Fisher's z Transformation)**

| Variable    | With Variable | N  | Sample Correlation | Fisher's z | Bias Adjustment | Correlation Estimate | 95% Confidence Limits |          | p Value for H0:Rho=0 |
|-------------|---------------|----|--------------------|------------|-----------------|----------------------|-----------------------|----------|----------------------|
| top2lg2mean | MAF           | 12 | 0.26584            | 0.27238    | 0.01208         | 0.25457              | -0.373967             | 0.722863 | 0.4139               |

**Correlation C\_pooltop2lg2mean\_tp2 symbol MAF**

**The CORR Procedure**

Gene\_Symbol=CHGA

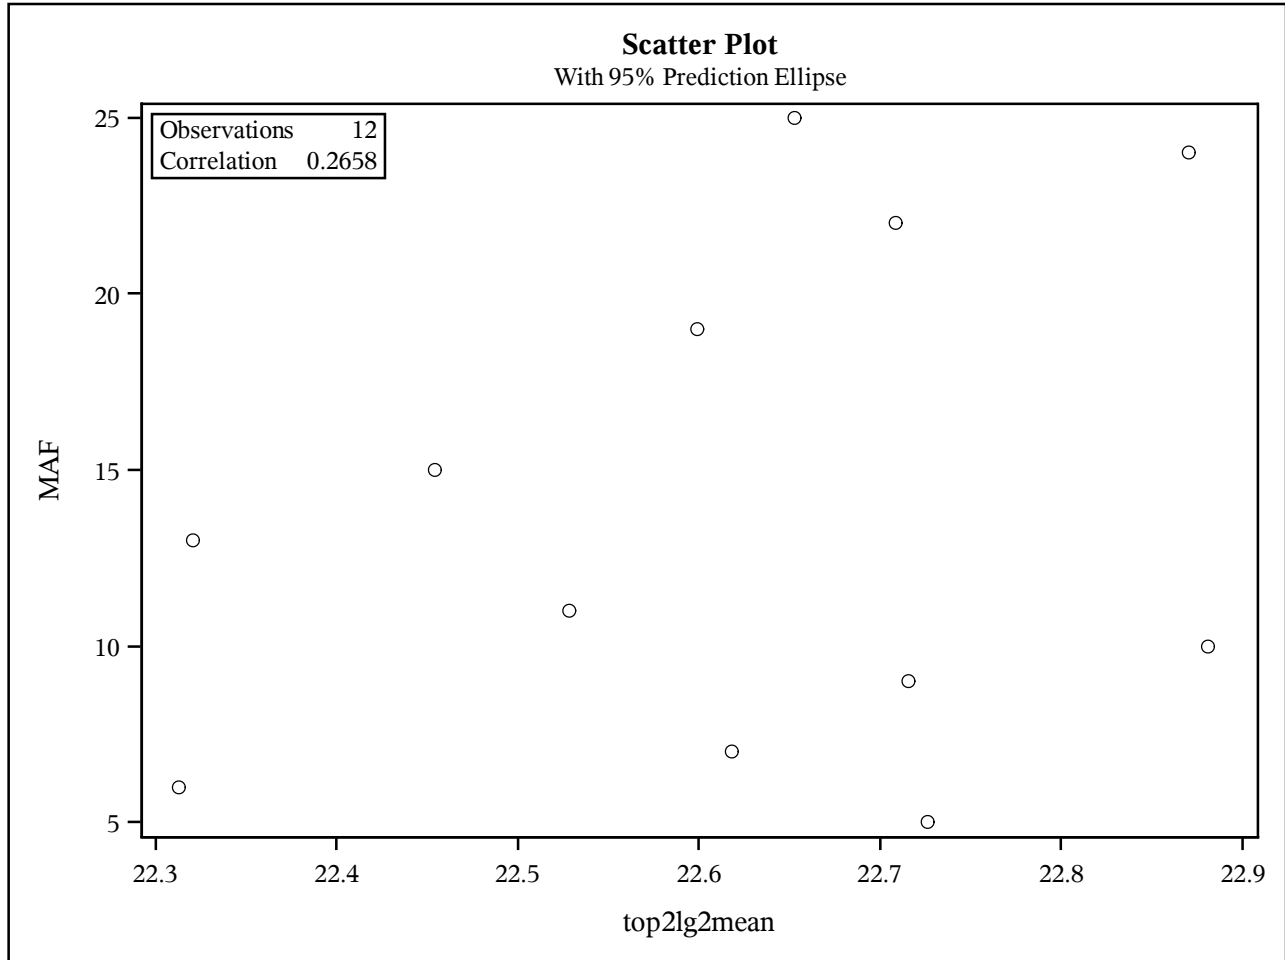



**Correlation C\_pooltop2lg2mean\_tp2 symbol MAF****The CORR Procedure**

Gene\_Symbol=CHGB

2 Variables: top2lg2mean MAF

| Simple Statistics |    |          |         |           |          |          |
|-------------------|----|----------|---------|-----------|----------|----------|
| Variable          | N  | Mean     | Std Dev | Sum       | Minimum  | Maximum  |
| top2lg2mean       | 12 | 22.22482 | 0.18428 | 266.69786 | 21.95818 | 22.55311 |
| MAF               | 12 | 13.83333 | 7.10740 | 166.00000 | 5.00000  | 25.00000 |

| Pearson Correlation Coefficients, N = 12<br>Prob >  r  under H0: Rho=0 |                   |                   |
|------------------------------------------------------------------------|-------------------|-------------------|
|                                                                        | top2lg2mean       | MAF               |
| top2lg2mean                                                            | 1.00000           | 0.70940<br>0.0098 |
| MAF                                                                    | 0.70940<br>0.0098 | 1.00000           |

**Pearson Correlation Statistics (Fisher's z Transformation)**

| Variable    | With Variable | N  | Sample Correlation | Fisher's z | Bias Adjustment | Correlation Estimate | 95% Confidence Limits |          | p Value for H0:Rho=0 |
|-------------|---------------|----|--------------------|------------|-----------------|----------------------|-----------------------|----------|----------------------|
| top2lg2mean | MAF           | 12 | 0.70940            | 0.88597    | 0.03225         | 0.69301              | 0.197765              | 0.906414 | 0.0079               |

**Correlation C\_pooltop2lg2mean\_tp2 symbol MAF**

**The CORR Procedure**

Gene\_Symbol=CHGB

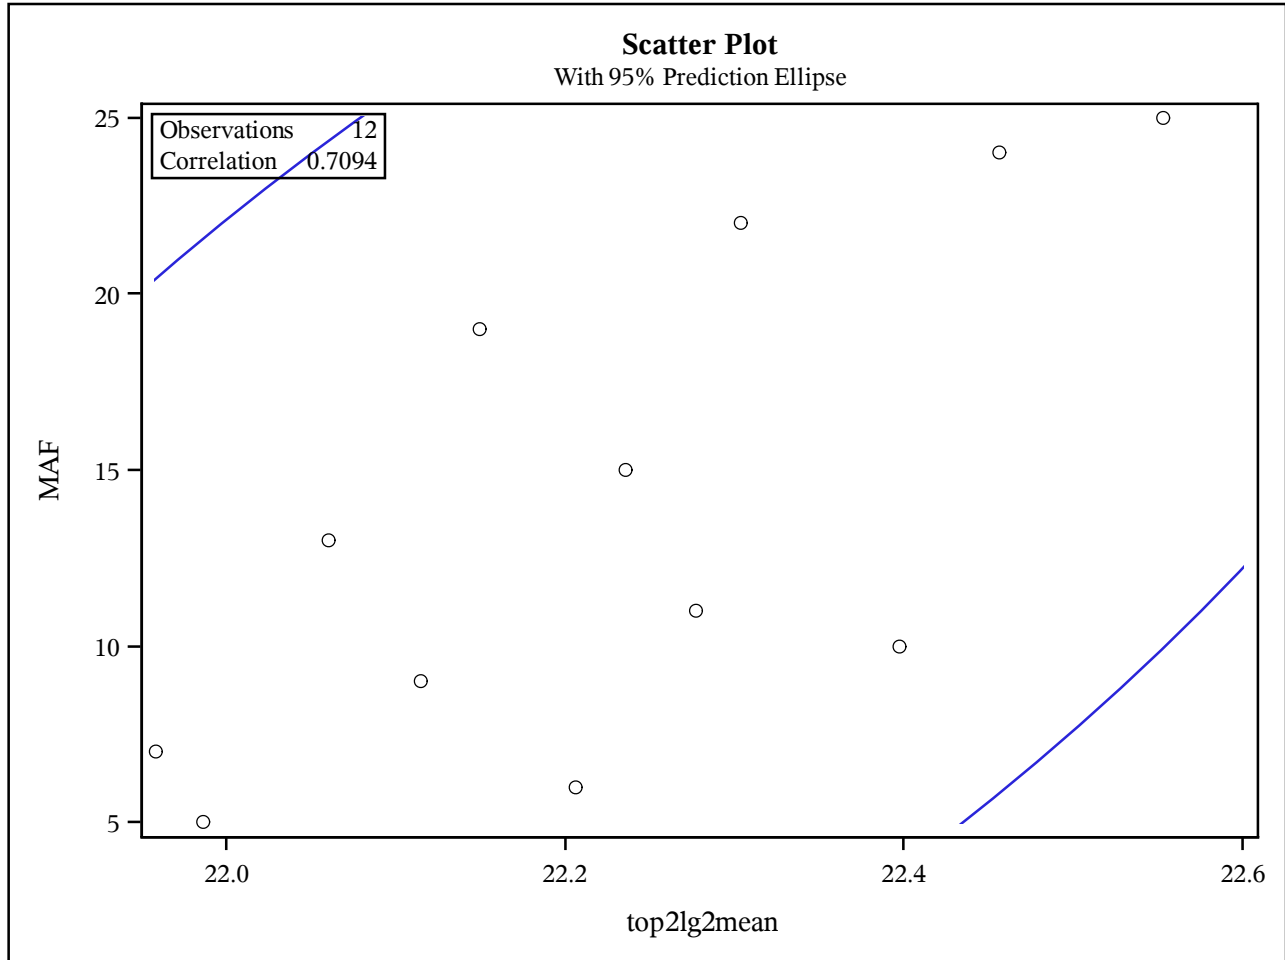

**Correlation C\_pooltop2lg2mean\_tp2 symbol MAF****The CORR Procedure**

Gene\_Symbol=CHL1

2 Variables: top2lg2mean MAF

| Simple Statistics |    |          |         |           |          |          |
|-------------------|----|----------|---------|-----------|----------|----------|
| Variable          | N  | Mean     | Std Dev | Sum       | Minimum  | Maximum  |
| top2lg2mean       | 12 | 20.32975 | 0.64128 | 243.95697 | 19.43727 | 21.37758 |
| MAF               | 12 | 13.83333 | 7.10740 | 166.00000 | 5.00000  | 25.00000 |

| Pearson Correlation Coefficients, N = 12<br>Prob >  r  under H0: Rho=0 |                   |                   |
|------------------------------------------------------------------------|-------------------|-------------------|
|                                                                        | top2lg2mean       | MAF               |
| top2lg2mean                                                            | 1.00000           | 0.26241<br>0.4100 |
| MAF                                                                    | 0.26241<br>0.4100 | 1.00000           |

| Pearson Correlation Statistics (Fisher's z Transformation) |               |    |                    |            |                 |                      |                       |          |                      |
|------------------------------------------------------------|---------------|----|--------------------|------------|-----------------|----------------------|-----------------------|----------|----------------------|
| Variable                                                   | With Variable | N  | Sample Correlation | Fisher's z | Bias Adjustment | Correlation Estimate | 95% Confidence Limits |          | p Value for H0:Rho=0 |
| top2lg2mean                                                | MAF           | 12 | 0.26241            | 0.26870    | 0.01193         | 0.25127              | -0.376993             | 0.721177 | 0.4202               |

**Correlation C\_pooltop2lg2mean\_tp2 symbol MAF****The CORR Procedure**

Gene\_Symbol=CHL1

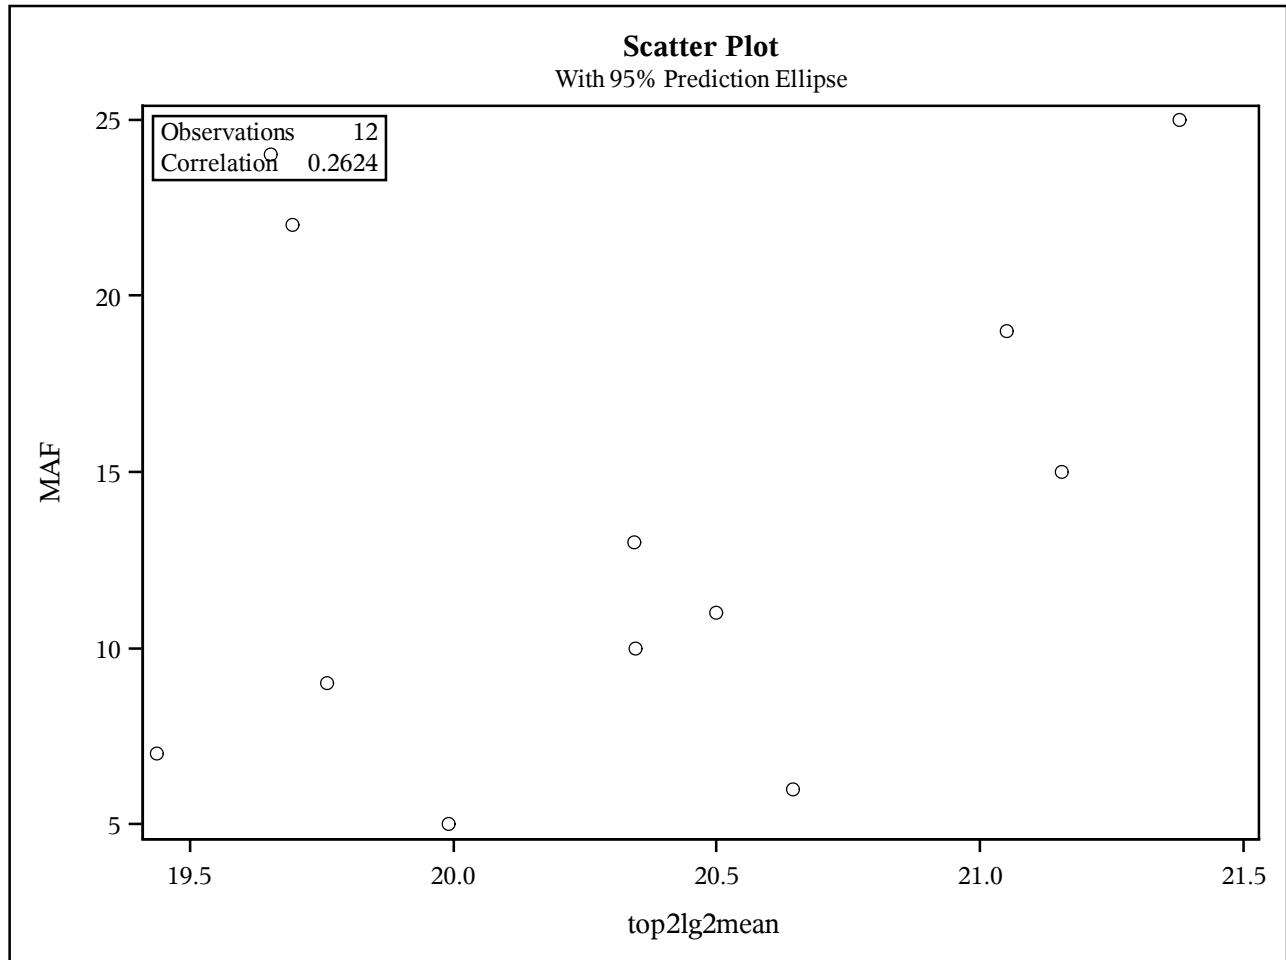

**Correlation C\_pooltop2lg2mean\_tp2 symbol MAF****The CORR Procedure**

Gene\_Symbol=CLU

2 Variables: top2lg2mean MAF

| Simple Statistics |    |          |         |           |          |          |
|-------------------|----|----------|---------|-----------|----------|----------|
| Variable          | N  | Mean     | Std Dev | Sum       | Minimum  | Maximum  |
| top2lg2mean       | 12 | 24.56620 | 0.25894 | 294.79441 | 24.03016 | 24.87867 |
| MAF               | 12 | 13.83333 | 7.10740 | 166.00000 | 5.00000  | 25.00000 |

| Pearson Correlation Coefficients, N = 12<br>Prob >  r  under H0: Rho=0 |                    |                    |
|------------------------------------------------------------------------|--------------------|--------------------|
|                                                                        | top2lg2mean        | MAF                |
| top2lg2mean                                                            | 1.00000            | -0.03388<br>0.9168 |
| MAF                                                                    | -0.03388<br>0.9168 | 1.00000            |

**Pearson Correlation Statistics (Fisher's z Transformation)**

| Variable    | With Variable | N  | Sample Correlation | Fisher's z | Bias Adjustment | Correlation Estimate | 95% Confidence Limits |          | p Value for H0:Rho=0 |
|-------------|---------------|----|--------------------|------------|-----------------|----------------------|-----------------------|----------|----------------------|
| top2lg2mean | MAF           | 12 | -0.03388           | -0.03389   | -0.00154        | -0.03234             | -0.595193             | 0.551805 | 0.9190               |

**Correlation C\_pooltop2lg2mean\_tp2 symbol MAF**

**The CORR Procedure**

Gene\_Symbol=CLU

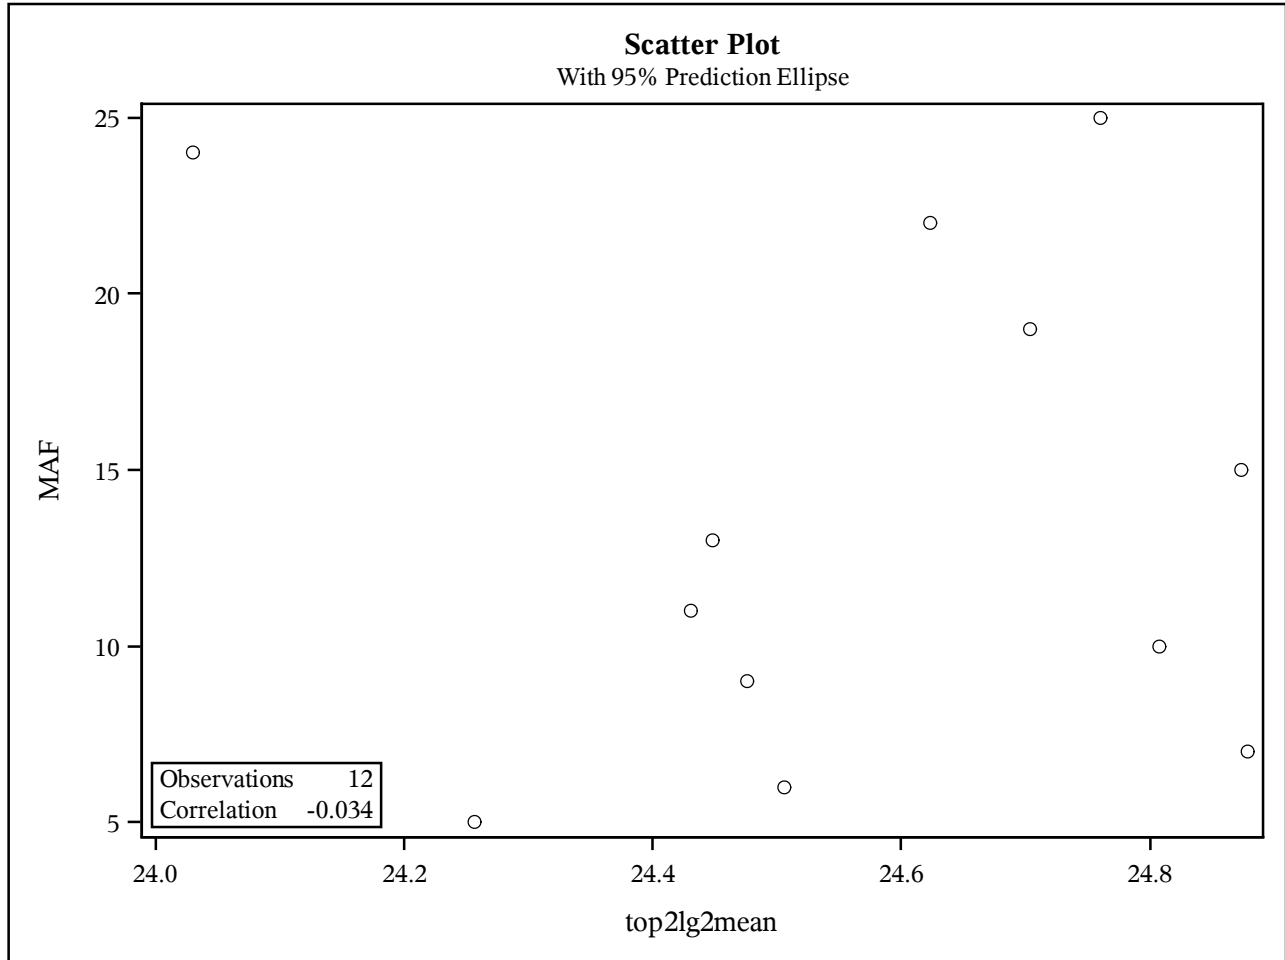

**Correlation C\_pooltop2lg2mean\_tp2 symbol MAF****The CORR Procedure**

Gene\_Symbol=CNDP1

2 Variables: top2lg2mean MAF

| Simple Statistics |    |          |         |           |          |          |
|-------------------|----|----------|---------|-----------|----------|----------|
| Variable          | N  | Mean     | Std Dev | Sum       | Minimum  | Maximum  |
| top2lg2mean       | 12 | 22.80093 | 0.11438 | 273.61114 | 22.58143 | 22.93465 |
| MAF               | 12 | 13.83333 | 7.10740 | 166.00000 | 5.00000  | 25.00000 |

| Pearson Correlation Coefficients, N = 12<br>Prob >  r  under H0: Rho=0 |                    |                    |
|------------------------------------------------------------------------|--------------------|--------------------|
|                                                                        | top2lg2mean        | MAF                |
| top2lg2mean                                                            | 1.00000            | -0.05252<br>0.8712 |
| MAF                                                                    | -0.05252<br>0.8712 | 1.00000            |

**Pearson Correlation Statistics (Fisher's z Transformation)**

| Variable    | With Variable | N  | Sample Correlation | Fisher's z | Bias Adjustment | Correlation Estimate | 95% Confidence Limits |          | p Value for H0:Rho=0 |
|-------------|---------------|----|--------------------|------------|-----------------|----------------------|-----------------------|----------|----------------------|
| top2lg2mean | MAF           | 12 | -0.05252           | -0.05257   | -0.00239        | -0.05014             | -0.606588             | 0.539279 | 0.8747               |

**Correlation C\_pooltop2lg2mean\_tp2 symbol MAF****The CORR Procedure**

Gene\_Symbol=CNDP1

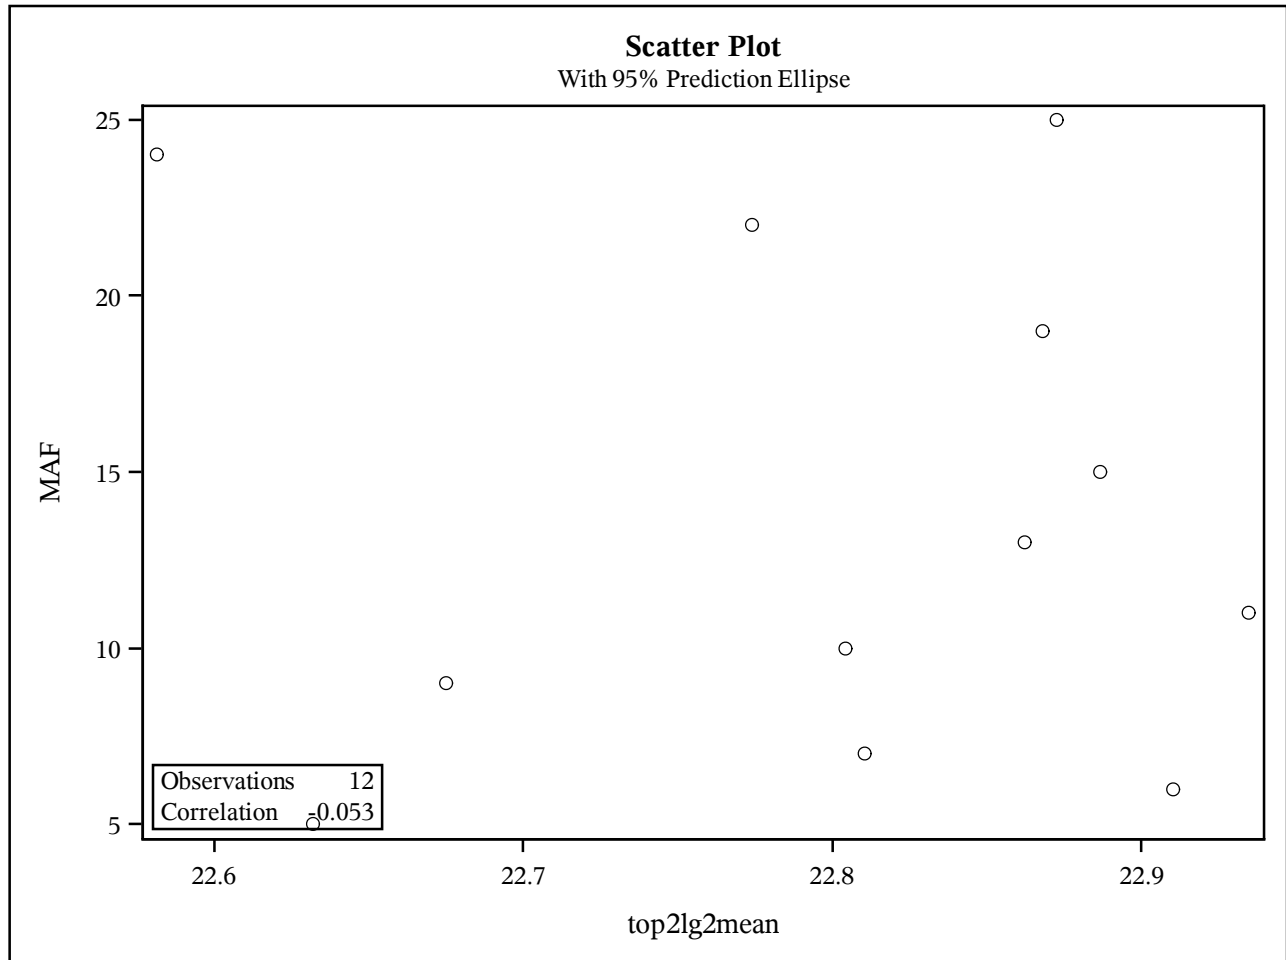



**Correlation C\_pooltop2lg2mean\_tp2 symbol MAF****The CORR Procedure**

Gene\_Symbol=CNTN1

2 Variables: top2lg2mean MAF

| Simple Statistics |    |          |         |           |          |          |
|-------------------|----|----------|---------|-----------|----------|----------|
| Variable          | N  | Mean     | Std Dev | Sum       | Minimum  | Maximum  |
| top2lg2mean       | 12 | 20.00227 | 0.16488 | 240.02726 | 19.59967 | 20.23726 |
| MAF               | 12 | 13.83333 | 7.10740 | 166.00000 | 5.00000  | 25.00000 |

| Pearson Correlation Coefficients, N = 12<br>Prob >  r  under H0: Rho=0 |                   |                   |
|------------------------------------------------------------------------|-------------------|-------------------|
|                                                                        | top2lg2mean       | MAF               |
| top2lg2mean                                                            | 1.00000           | 0.48987<br>0.1060 |
| MAF                                                                    | 0.48987<br>0.1060 | 1.00000           |

**Pearson Correlation Statistics (Fisher's z Transformation)**

| Variable    | With Variable | N  | Sample Correlation | Fisher's z | Bias Adjustment | Correlation Estimate | 95% Confidence Limits |          | p Value for H0:Rho=0 |
|-------------|---------------|----|--------------------|------------|-----------------|----------------------|-----------------------|----------|----------------------|
| top2lg2mean | MAF           | 12 | 0.48987            | 0.53589    | 0.02227         | 0.47276              | -0.138798             | 0.823290 | 0.1079               |

**Correlation  $C_{pooltop2lg2mean\_tp2}$  symbol MAF****The CORR Procedure**

Gene\_Symbol=CNTN1

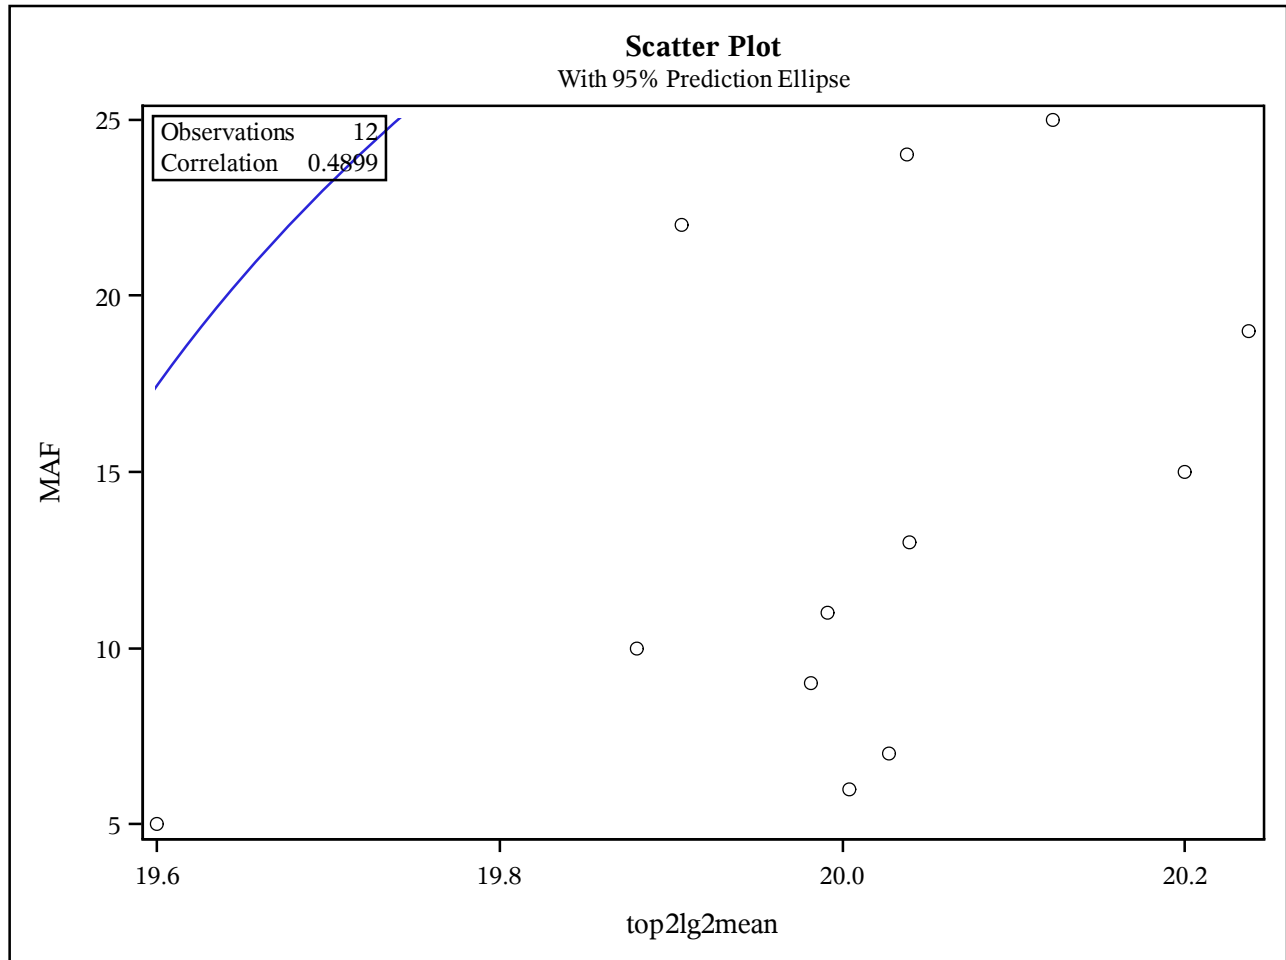

**Correlation C\_pooltop2lg2mean\_tp2 symbol MAF****The CORR Procedure**

Gene\_Symbol=CP

2 Variables: top2lg2mean MAF

| Simple Statistics |    |          |         |           |          |          |
|-------------------|----|----------|---------|-----------|----------|----------|
| Variable          | N  | Mean     | Std Dev | Sum       | Minimum  | Maximum  |
| top2lg2mean       | 12 | 22.55661 | 0.31053 | 270.67936 | 22.02298 | 23.05525 |
| MAF               | 12 | 13.83333 | 7.10740 | 166.00000 | 5.00000  | 25.00000 |

| Pearson Correlation Coefficients, N = 12<br>Prob >  r  under H0: Rho=0 |                    |                    |
|------------------------------------------------------------------------|--------------------|--------------------|
|                                                                        | top2lg2mean        | MAF                |
| top2lg2mean                                                            | 1.00000            | -0.30867<br>0.3290 |
| MAF                                                                    | -0.30867<br>0.3290 | 1.00000            |

**Pearson Correlation Statistics (Fisher's z Transformation)**

| Variable    | With Variable | N  | Sample Correlation | Fisher's z | Bias Adjustment | Correlation Estimate | 95% Confidence Limits |          | p Value for H0:Rho=0 |
|-------------|---------------|----|--------------------|------------|-----------------|----------------------|-----------------------|----------|----------------------|
| top2lg2mean | MAF           | 12 | -0.30867           | -0.31907   | -0.01403        | -0.29592             | -0.743545             | 0.334850 | 0.3385               |

**Correlation C\_pooltop2lg2mean\_tp2 symbol MAF**

**The CORR Procedure**

Gene\_Symbol=CP

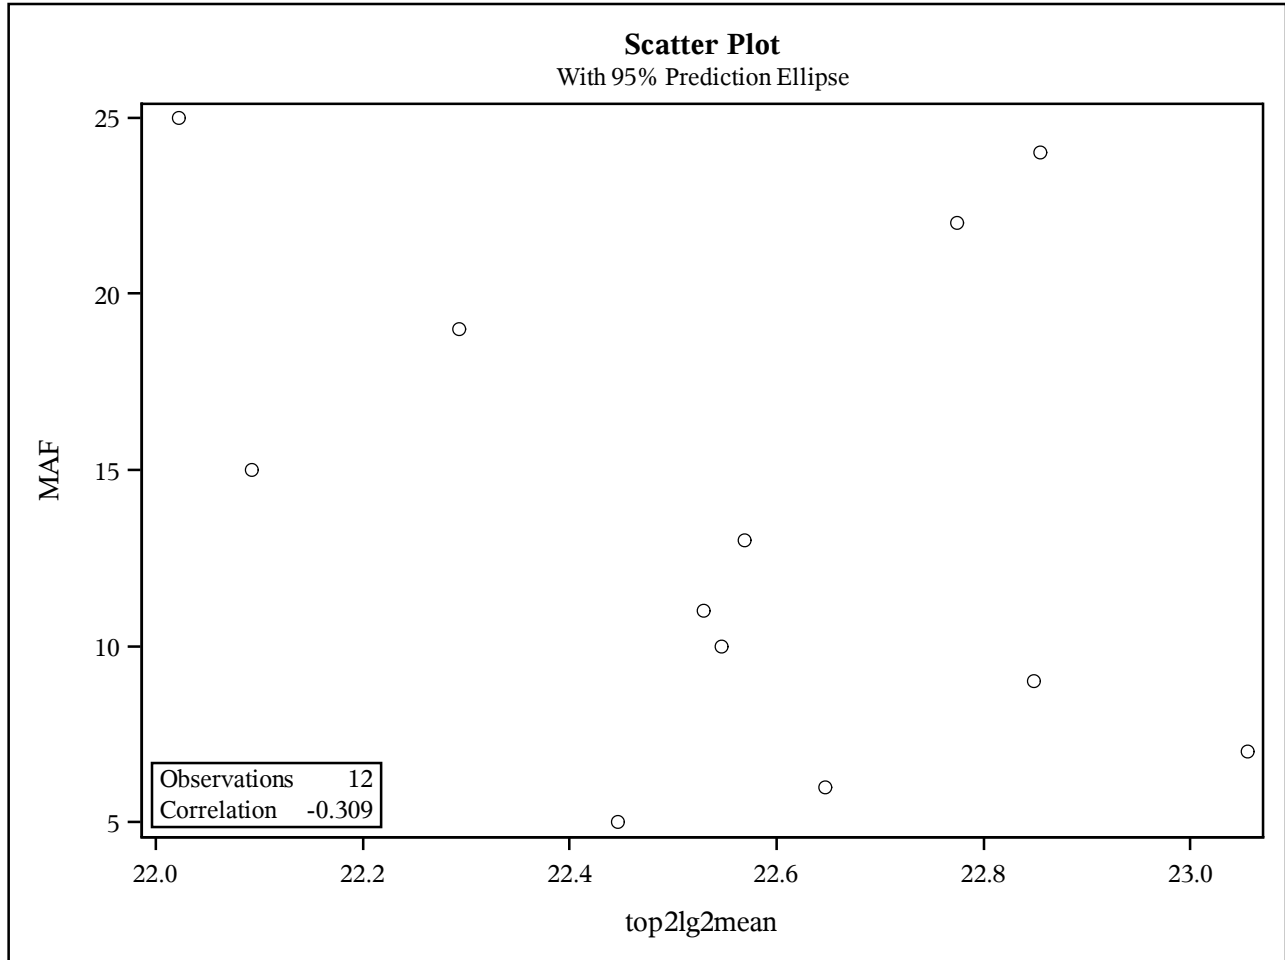

**Correlation C\_pooltop2lg2mean\_tp2 symbol MAF****The CORR Procedure**

Gene\_Symbol=CPA1

2 Variables: top2lg2mean MAF

| Simple Statistics |    |          |         |           |          |          |
|-------------------|----|----------|---------|-----------|----------|----------|
| Variable          | N  | Mean     | Std Dev | Sum       | Minimum  | Maximum  |
| top2lg2mean       | 12 | 16.97277 | 0.37952 | 203.67329 | 16.44452 | 17.86625 |
| MAF               | 12 | 13.83333 | 7.10740 | 166.00000 | 5.00000  | 25.00000 |

| Pearson Correlation Coefficients, N = 12<br>Prob >  r  under H0: Rho=0 |                    |                    |
|------------------------------------------------------------------------|--------------------|--------------------|
|                                                                        | top2lg2mean        | MAF                |
| top2lg2mean                                                            | 1.00000            | -0.08206<br>0.7998 |
| MAF                                                                    | -0.08206<br>0.7998 | 1.00000            |

**Pearson Correlation Statistics (Fisher's z Transformation)**

| Variable    | With Variable | N  | Sample Correlation | Fisher's z | Bias Adjustment | Correlation Estimate | 95% Confidence Limits |          | p Value for H0:Rho=0 |
|-------------|---------------|----|--------------------|------------|-----------------|----------------------|-----------------------|----------|----------------------|
| top2lg2mean | MAF           | 12 | -0.08206           | -0.08225   | -0.00373        | -0.07836             | -0.624190             | 0.518877 | 0.8051               |

**Correlation  $C_{pooltop2lg2mean\_tp2}$  symbol MAF****The CORR Procedure**

Gene\_Symbol=CPA1

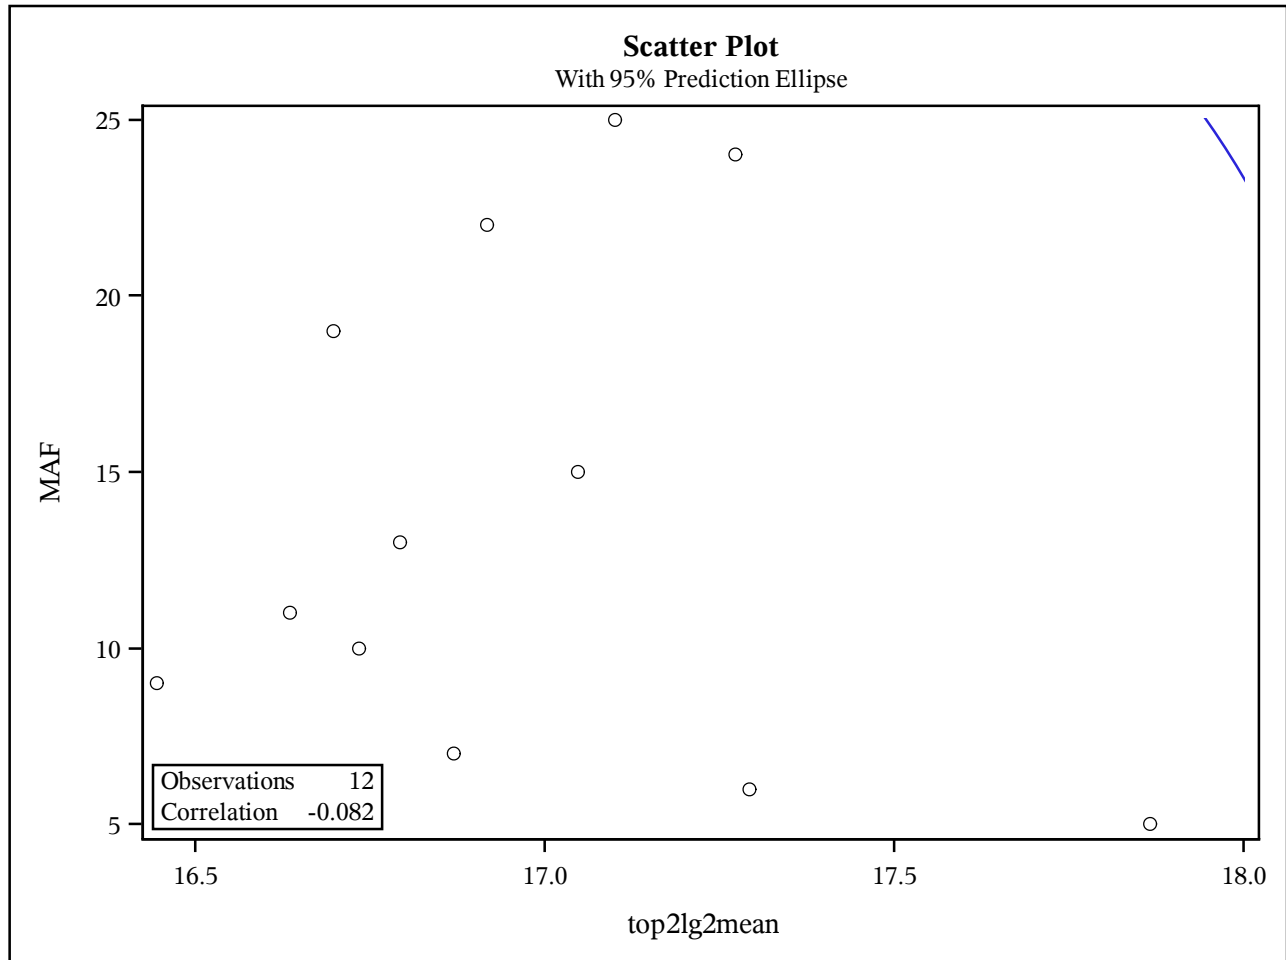

**Correlation C\_pooltop2lg2mean\_tp2 symbol MAF****The CORR Procedure**

Gene\_Symbol=CPE

2 Variables: top2lg2mean MAF

| Simple Statistics |    |          |         |           |          |          |
|-------------------|----|----------|---------|-----------|----------|----------|
| Variable          | N  | Mean     | Std Dev | Sum       | Minimum  | Maximum  |
| top2lg2mean       | 12 | 17.11630 | 0.28200 | 205.39565 | 16.67208 | 17.43015 |
| MAF               | 12 | 13.83333 | 7.10740 | 166.00000 | 5.00000  | 25.00000 |

| Pearson Correlation Coefficients, N = 12<br>Prob >  r  under H0: Rho=0 |                   |                   |
|------------------------------------------------------------------------|-------------------|-------------------|
|                                                                        | top2lg2mean       | MAF               |
| top2lg2mean                                                            | 1.00000           | 0.06398<br>0.8434 |
| MAF                                                                    | 0.06398<br>0.8434 | 1.00000           |

**Pearson Correlation Statistics (Fisher's z Transformation)**

| Variable    | With Variable | N  | Sample Correlation | Fisher's z | Bias Adjustment | Correlation Estimate | 95% Confidence Limits |          | p Value for H0:Rho=0 |
|-------------|---------------|----|--------------------|------------|-----------------|----------------------|-----------------------|----------|----------------------|
| top2lg2mean | MAF           | 12 | 0.06398            | 0.06407    | 0.00291         | 0.06108              | -0.531450             | 0.613478 | 0.8476               |

**Correlation  $C_{pooltop2lg2mean\_tp2}$  symbol MAF****The CORR Procedure**

Gene\_Symbol=CPE

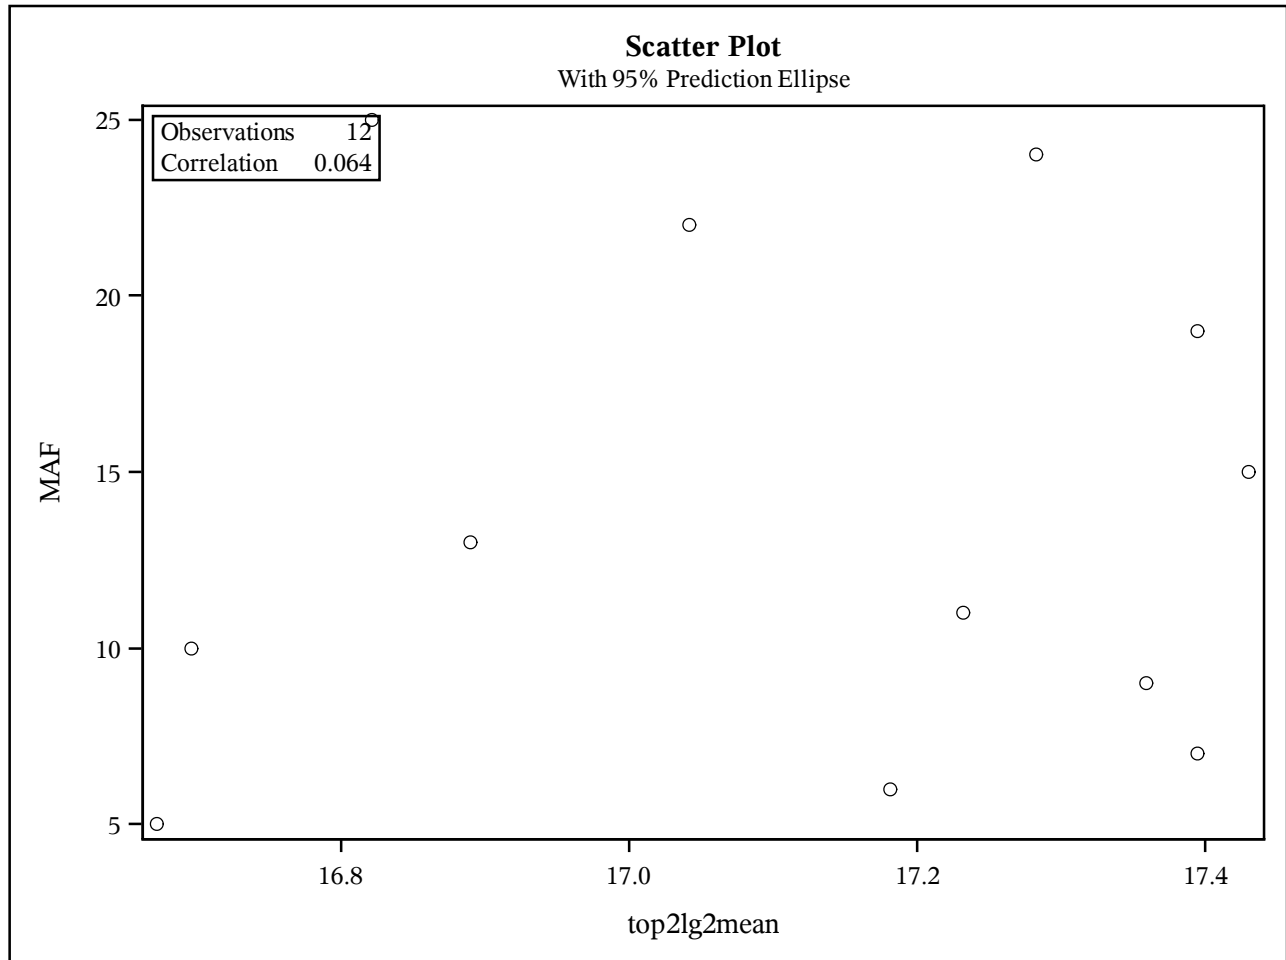



**Correlation C\_pooltop2lg2mean\_tp2 symbol MAF****The CORR Procedure**

Gene\_Symbol=CRTAC1

2 Variables: top2lg2mean MAF

| Simple Statistics |    |          |         |           |          |          |
|-------------------|----|----------|---------|-----------|----------|----------|
| Variable          | N  | Mean     | Std Dev | Sum       | Minimum  | Maximum  |
| top2lg2mean       | 12 | 16.15360 | 1.94327 | 193.84315 | 10.01973 | 17.06571 |
| MAF               | 12 | 13.83333 | 7.10740 | 166.00000 | 5.00000  | 25.00000 |

| Pearson Correlation Coefficients, N = 12<br>Prob >  r  under H0: Rho=0 |                   |                   |
|------------------------------------------------------------------------|-------------------|-------------------|
|                                                                        | top2lg2mean       | MAF               |
| top2lg2mean                                                            | 1.00000           | 0.33267<br>0.2907 |
| MAF                                                                    | 0.33267<br>0.2907 | 1.00000           |

**Pearson Correlation Statistics (Fisher's z Transformation)**

| Variable    | With Variable | N  | Sample Correlation | Fisher's z | Bias Adjustment | Correlation Estimate | 95% Confidence Limits |          | p Value for H0:Rho=0 |
|-------------|---------------|----|--------------------|------------|-----------------|----------------------|-----------------------|----------|----------------------|
| top2lg2mean | MAF           | 12 | 0.33267            | 0.34582    | 0.01512         | 0.31915              | -0.311872             | 0.754803 | 0.2995               |

**Correlation C\_pooltop2lg2mean\_tp2 symbol MAF**

**The CORR Procedure**

Gene\_Symbol=CRTAC1

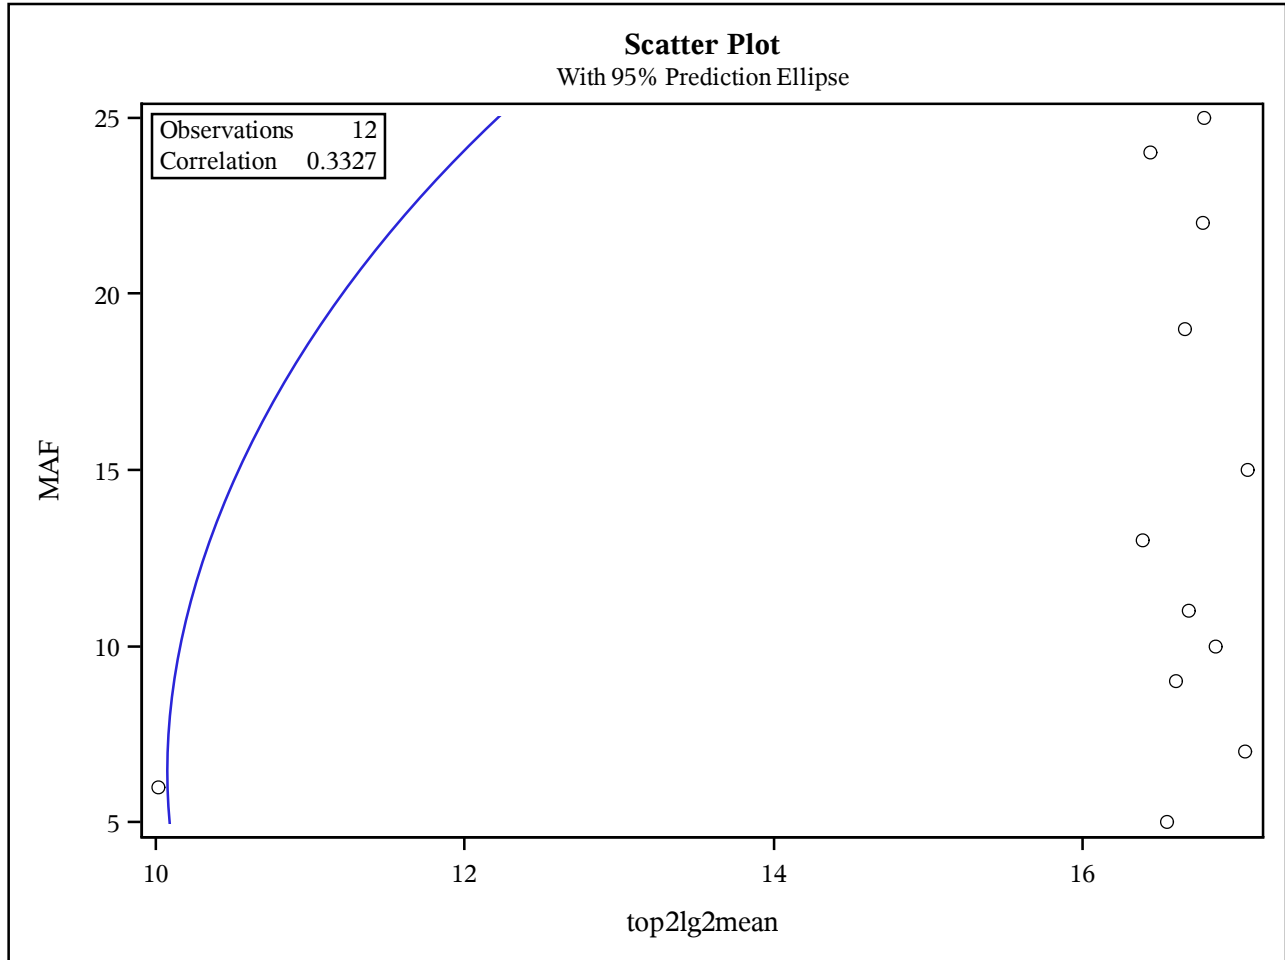

**Correlation C\_pooltop2lg2mean\_tp2 symbol MAF****The CORR Procedure**

Gene\_Symbol=CST3

2 Variables: top2lg2mean MAF

| Simple Statistics |    |          |         |           |          |          |
|-------------------|----|----------|---------|-----------|----------|----------|
| Variable          | N  | Mean     | Std Dev | Sum       | Minimum  | Maximum  |
| top2lg2mean       | 12 | 25.23753 | 0.16033 | 302.85033 | 24.95270 | 25.56438 |
| MAF               | 12 | 13.83333 | 7.10740 | 166.00000 | 5.00000  | 25.00000 |

| Pearson Correlation Coefficients, N = 12<br>Prob >  r  under H0: Rho=0 |                    |                    |
|------------------------------------------------------------------------|--------------------|--------------------|
|                                                                        | top2lg2mean        | MAF                |
| top2lg2mean                                                            | 1.00000            | -0.01533<br>0.9623 |
| MAF                                                                    | -0.01533<br>0.9623 | 1.00000            |

| Pearson Correlation Statistics (Fisher's z Transformation) |               |    |                    |            |                 |                      |                       |          |                      |
|------------------------------------------------------------|---------------|----|--------------------|------------|-----------------|----------------------|-----------------------|----------|----------------------|
| Variable                                                   | With Variable | N  | Sample Correlation | Fisher's z | Bias Adjustment | Correlation Estimate | 95% Confidence Limits |          | p Value for H0:Rho=0 |
| top2lg2mean                                                | MAF           | 12 | -0.01533           | -0.01533   | -0.0006966      | -0.01463             | -0.583631             | 0.564008 | 0.9633               |

**Correlation C\_pooltop2lg2mean\_tp2 symbol MAF****The CORR Procedure**

Gene\_Symbol=CST3

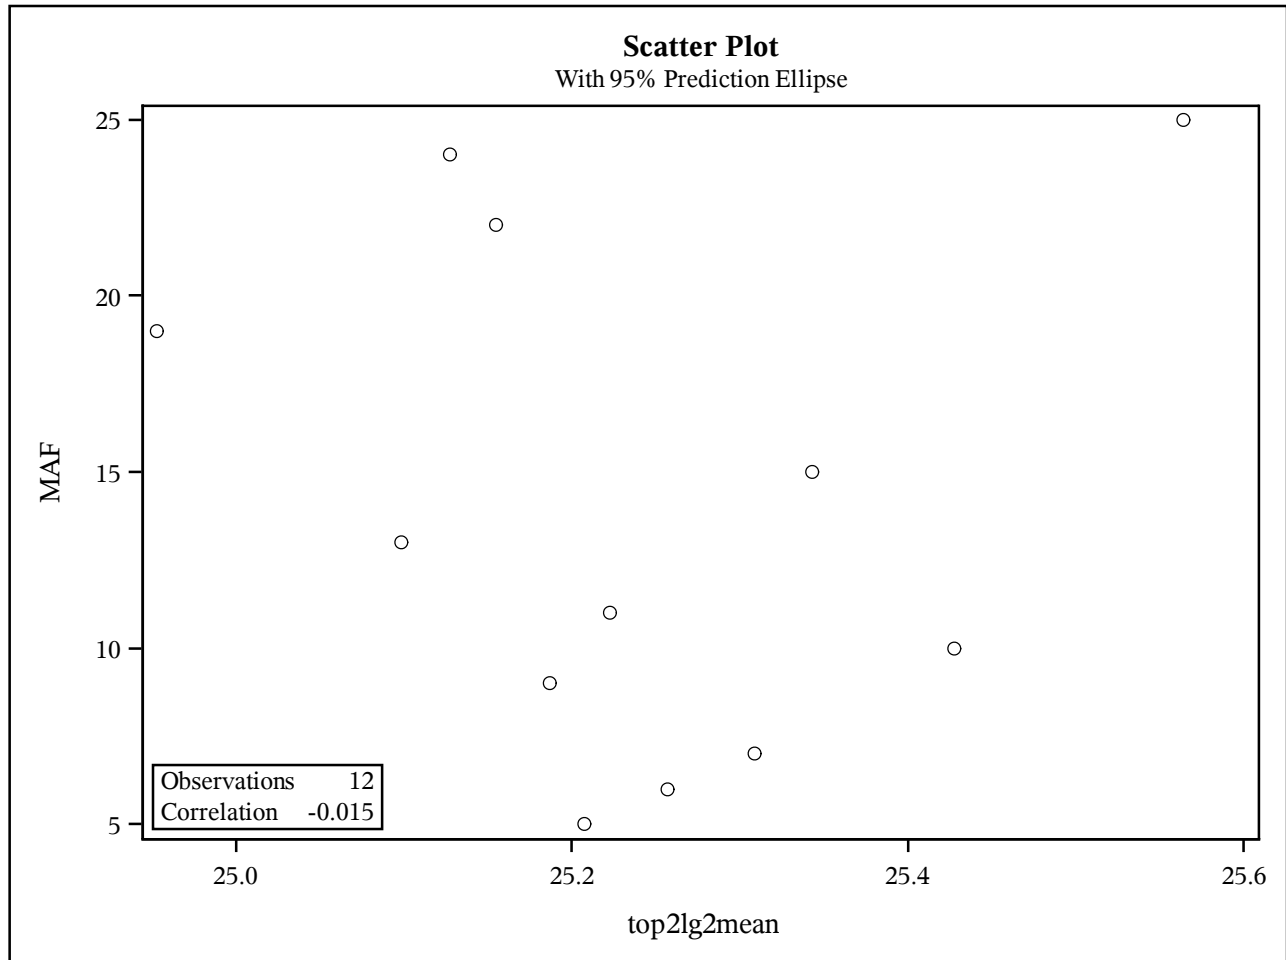

**Correlation C\_pooltop2lg2mean\_tp2 symbol MAF****The CORR Procedure**

Gene\_Symbol=DKK3

2 Variables: top2lg2mean MAF

| Simple Statistics |    |          |         |           |          |          |
|-------------------|----|----------|---------|-----------|----------|----------|
| Variable          | N  | Mean     | Std Dev | Sum       | Minimum  | Maximum  |
| top2lg2mean       | 12 | 20.10947 | 0.79286 | 241.31363 | 19.13980 | 21.78206 |
| MAF               | 12 | 13.83333 | 7.10740 | 166.00000 | 5.00000  | 25.00000 |

| Pearson Correlation Coefficients, N = 12<br>Prob >  r  under H0: Rho=0 |                    |                    |
|------------------------------------------------------------------------|--------------------|--------------------|
|                                                                        | top2lg2mean        | MAF                |
| top2lg2mean                                                            | 1.00000            | -0.06304<br>0.8457 |
| MAF                                                                    | -0.06304<br>0.8457 | 1.00000            |

**Pearson Correlation Statistics (Fisher's z Transformation)**

| Variable    | With Variable | N  | Sample Correlation | Fisher's z | Bias Adjustment | Correlation Estimate | 95% Confidence Limits |          | p Value for H0:Rho=0 |
|-------------|---------------|----|--------------------|------------|-----------------|----------------------|-----------------------|----------|----------------------|
| top2lg2mean | MAF           | 12 | -0.06304           | -0.06312   | -0.00287        | -0.06018             | -0.612915             | 0.532097 | 0.8498               |

**Correlation C\_pooltop2lg2mean\_tp2 symbol MAF****The CORR Procedure**

Gene\_Symbol=DKK3

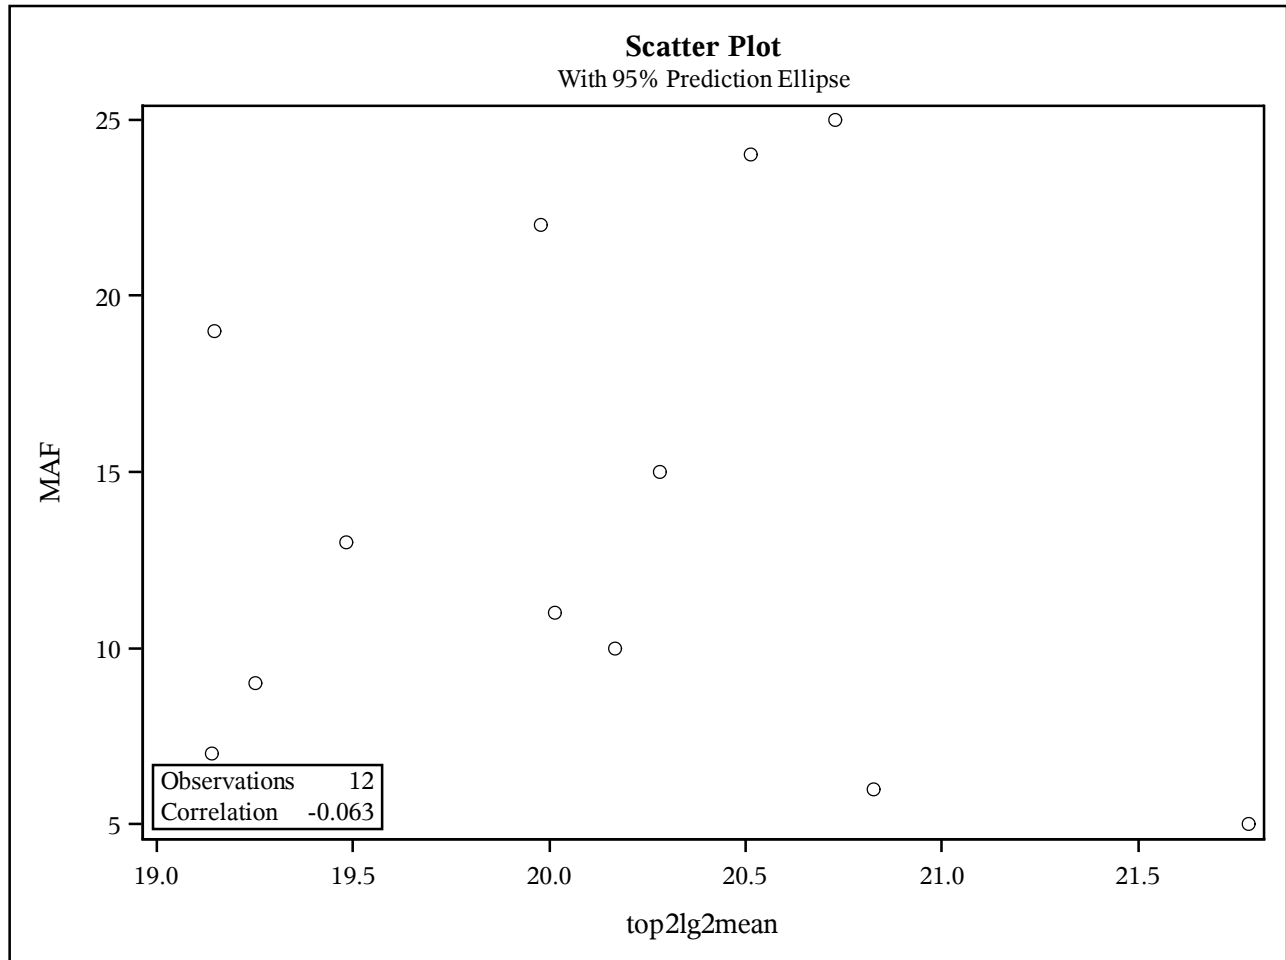

**Correlation C\_pooltop2lg2mean\_tp2 symbol MAF****The CORR Procedure**

Gene\_Symbol=EFEMP1

2 Variables: top2lg2mean MAF

| Simple Statistics |    |          |         |           |          |          |
|-------------------|----|----------|---------|-----------|----------|----------|
| Variable          | N  | Mean     | Std Dev | Sum       | Minimum  | Maximum  |
| top2lg2mean       | 12 | 20.60120 | 0.23123 | 247.21445 | 20.22609 | 21.07743 |
| MAF               | 12 | 13.83333 | 7.10740 | 166.00000 | 5.00000  | 25.00000 |

| Pearson Correlation Coefficients, N = 12<br>Prob >  r  under H0: Rho=0 |                   |                   |
|------------------------------------------------------------------------|-------------------|-------------------|
|                                                                        | top2lg2mean       | MAF               |
| top2lg2mean                                                            | 1.00000           | 0.06308<br>0.8456 |
| MAF                                                                    | 0.06308<br>0.8456 | 1.00000           |

**Pearson Correlation Statistics (Fisher's z Transformation)**

| Variable    | With Variable | N  | Sample Correlation | Fisher's z | Bias Adjustment | Correlation Estimate | 95% Confidence Limits |          | p Value for H0:Rho=0 |
|-------------|---------------|----|--------------------|------------|-----------------|----------------------|-----------------------|----------|----------------------|
| top2lg2mean | MAF           | 12 | 0.06308            | 0.06316    | 0.00287         | 0.06022              | -0.532069             | 0.612939 | 0.8497               |

**Correlation C\_pooltop2lg2mean\_tp2 symbol MAF**

**The CORR Procedure**

Gene\_Symbol=EFEMP1

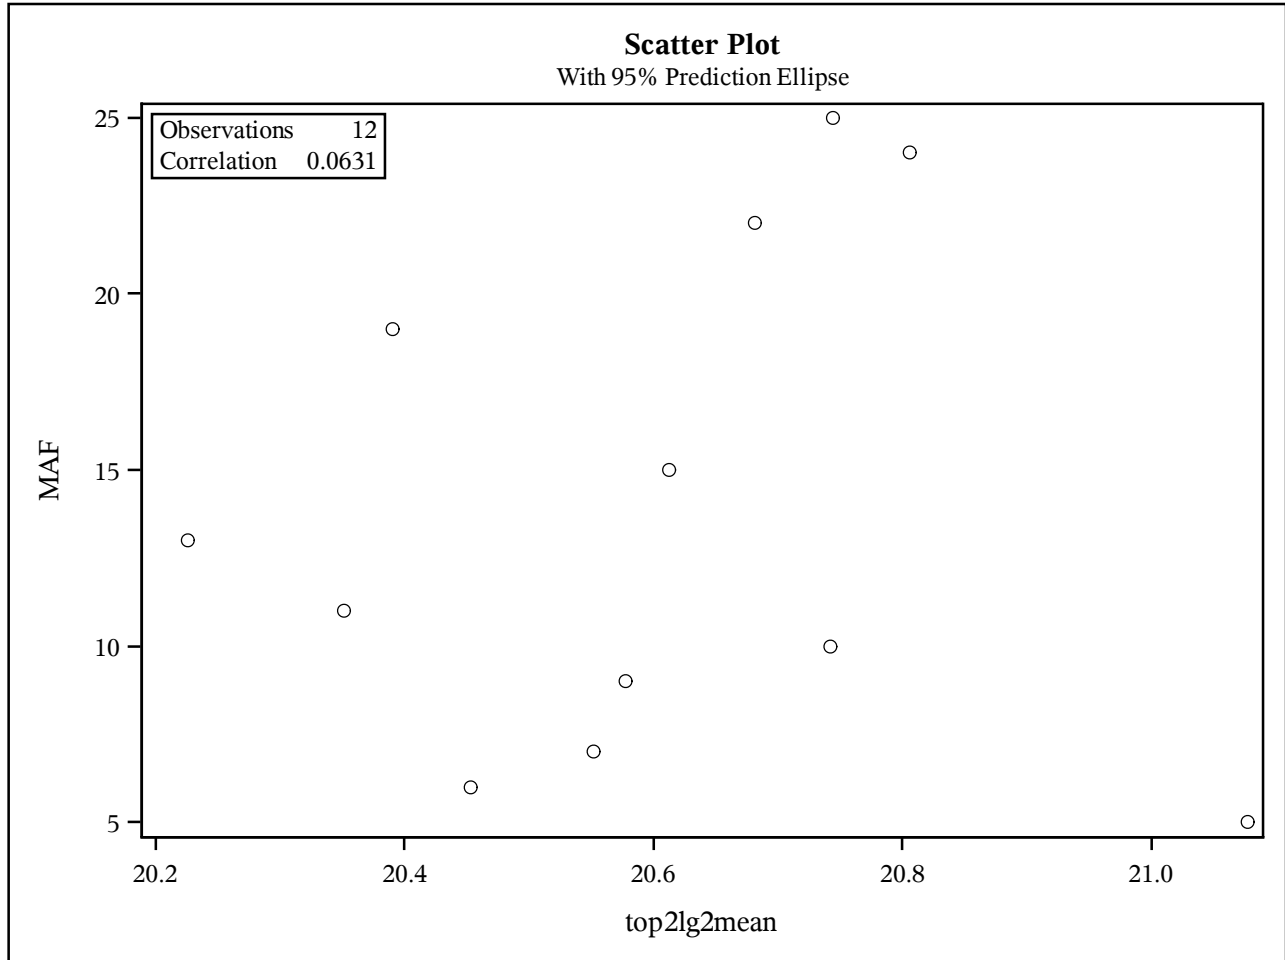



**Correlation C\_pooltop2lg2mean\_tp2 symbol MAF****The CORR Procedure**

Gene\_Symbol=ENPP2

2 Variables: top2lg2mean MAF

| Simple Statistics |    |          |         |           |          |          |
|-------------------|----|----------|---------|-----------|----------|----------|
| Variable          | N  | Mean     | Std Dev | Sum       | Minimum  | Maximum  |
| top2lg2mean       | 12 | 20.07433 | 0.89659 | 240.89194 | 18.69225 | 21.72345 |
| MAF               | 12 | 13.83333 | 7.10740 | 166.00000 | 5.00000  | 25.00000 |

| Pearson Correlation Coefficients, N = 12<br>Prob >  r  under H0: Rho=0 |                    |                    |
|------------------------------------------------------------------------|--------------------|--------------------|
|                                                                        | top2lg2mean        | MAF                |
| top2lg2mean                                                            | 1.00000            | -0.32116<br>0.3087 |
| MAF                                                                    | -0.32116<br>0.3087 | 1.00000            |

**Pearson Correlation Statistics (Fisher's z Transformation)**

| Variable    | With Variable | N  | Sample Correlation | Fisher's z | Bias Adjustment | Correlation Estimate | 95% Confidence Limits |          | p Value for H0:Rho=0 |
|-------------|---------------|----|--------------------|------------|-----------------|----------------------|-----------------------|----------|----------------------|
| top2lg2mean | MAF           | 12 | -0.32116           | -0.33293   | -0.01460        | -0.30800             | -0.749432             | 0.322992 | 0.3179               |

**Correlation C\_pooltop2lg2mean\_tp2 symbol MAF**

**The CORR Procedure**

Gene\_Symbol=ENPP2

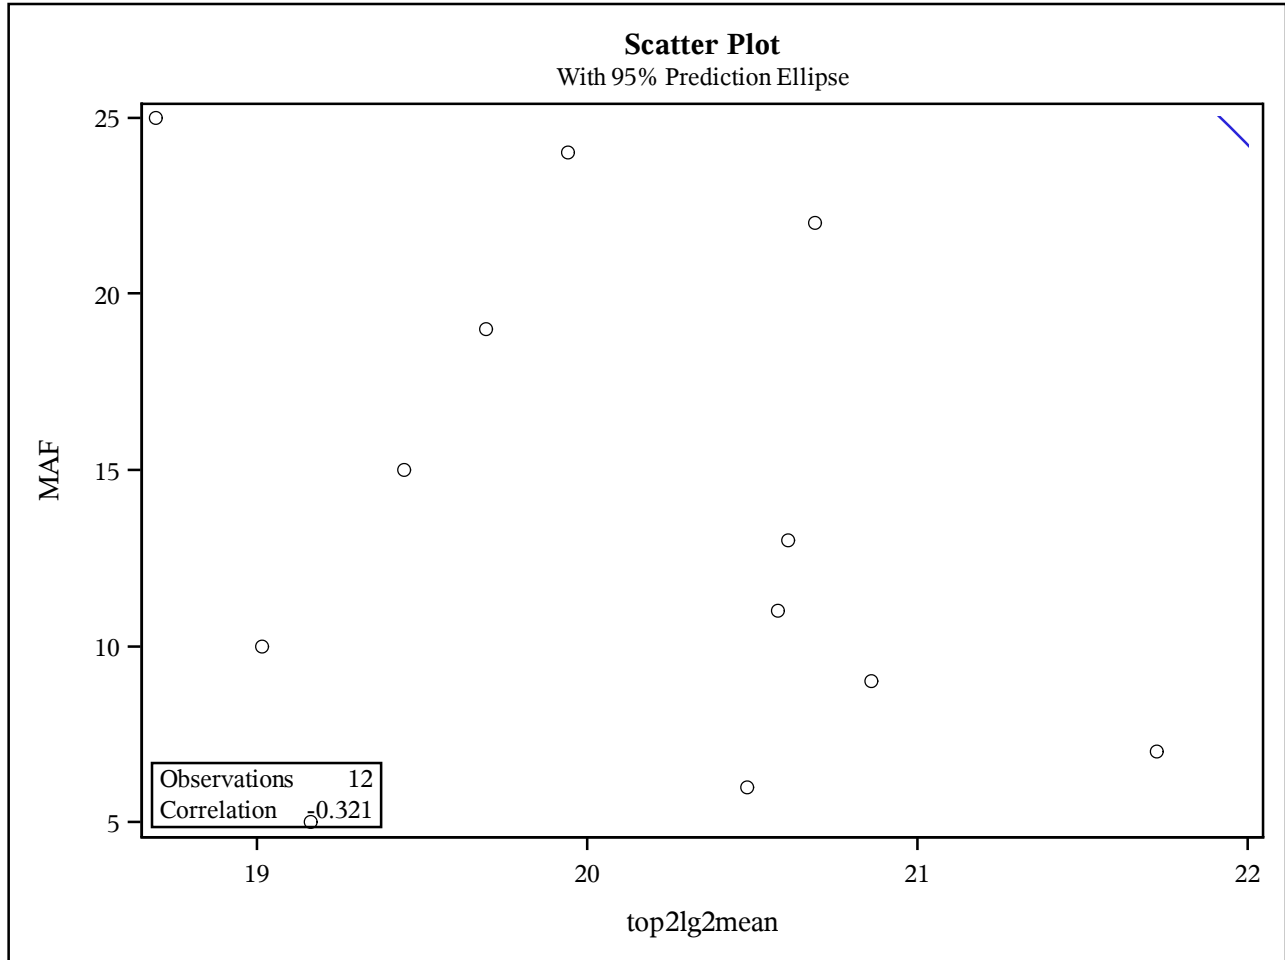

**Correlation C\_pooltop2lg2mean\_tp2 symbol MAF****The CORR Procedure**

Gene\_Symbol=F2

2 Variables: top2lg2mean MAF

| Simple Statistics |    |          |         |           |          |          |
|-------------------|----|----------|---------|-----------|----------|----------|
| Variable          | N  | Mean     | Std Dev | Sum       | Minimum  | Maximum  |
| top2lg2mean       | 12 | 19.93872 | 0.47286 | 239.26468 | 19.14113 | 20.64381 |
| MAF               | 12 | 13.83333 | 7.10740 | 166.00000 | 5.00000  | 25.00000 |

| Pearson Correlation Coefficients, N = 12<br>Prob >  r  under H0: Rho=0 |                    |                    |
|------------------------------------------------------------------------|--------------------|--------------------|
|                                                                        | top2lg2mean        | MAF                |
| top2lg2mean                                                            | 1.00000            | -0.20913<br>0.5142 |
| MAF                                                                    | -0.20913<br>0.5142 | 1.00000            |

**Pearson Correlation Statistics (Fisher's z Transformation)**

| Variable    | With Variable | N  | Sample Correlation | Fisher's z | Bias Adjustment | Correlation Estimate | 95% Confidence Limits |          | p Value for H0:Rho=0 |
|-------------|---------------|----|--------------------|------------|-----------------|----------------------|-----------------------|----------|----------------------|
| top2lg2mean | MAF           | 12 | -0.20913           | -0.21226   | -0.00951        | -0.20003             | -0.694232             | 0.422361 | 0.5243               |

**Correlation C\_pooltop2lg2mean\_tp2 symbol MAF**

**The CORR Procedure**

Gene\_Symbol=F2

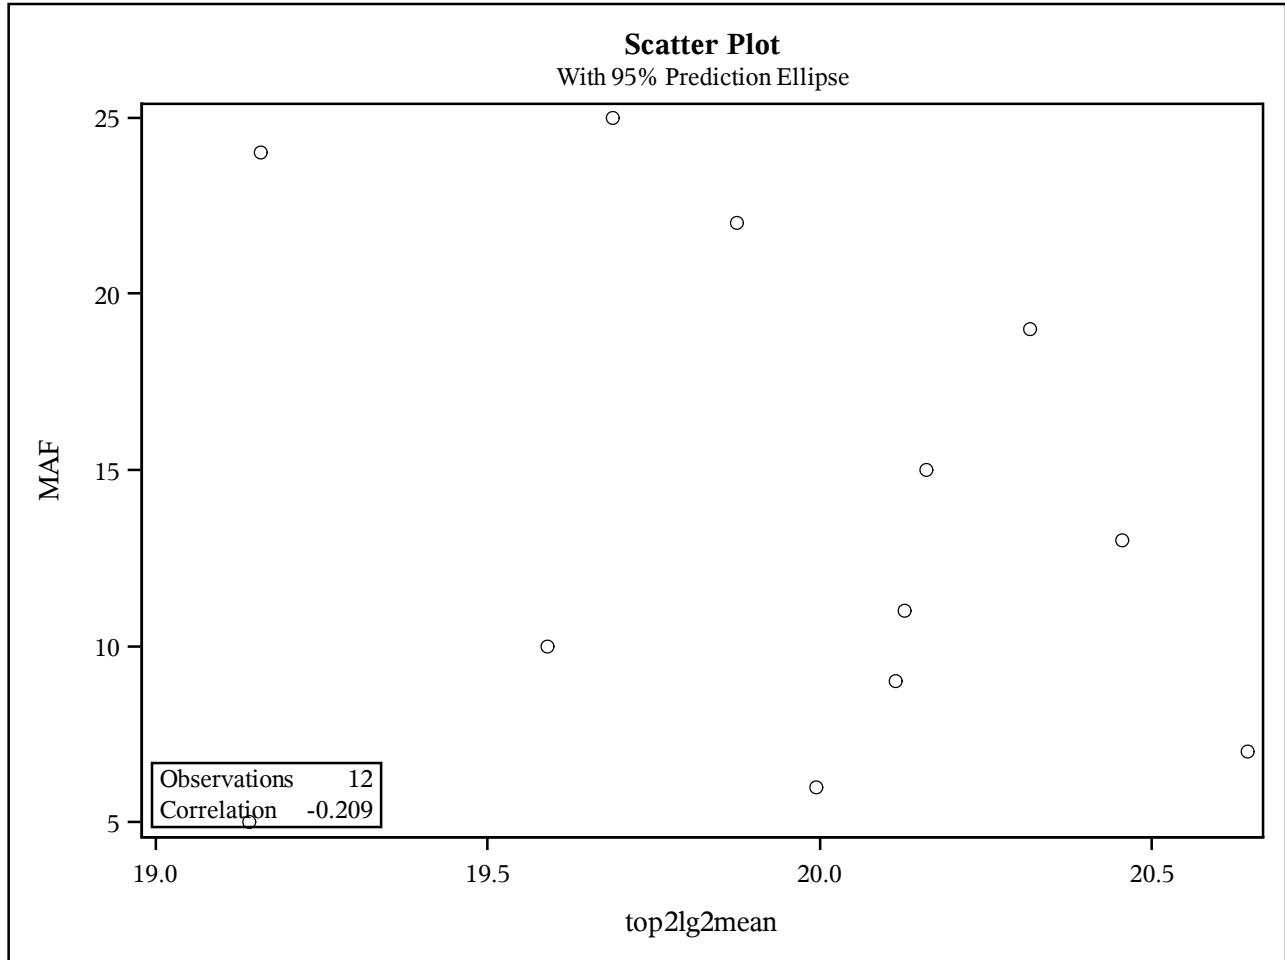

**Correlation C\_pooltop2lg2mean\_tp2 symbol MAF****The CORR Procedure**

Gene\_Symbol=FBLN1

2 Variables: top2lg2mean MAF

| Simple Statistics |    |          |         |           |          |          |
|-------------------|----|----------|---------|-----------|----------|----------|
| Variable          | N  | Mean     | Std Dev | Sum       | Minimum  | Maximum  |
| top2lg2mean       | 12 | 21.28993 | 0.21031 | 255.47919 | 20.90053 | 21.60484 |
| MAF               | 12 | 13.83333 | 7.10740 | 166.00000 | 5.00000  | 25.00000 |

| Pearson Correlation Coefficients, N = 12<br>Prob >  r  under H0: Rho=0 |                   |                   |
|------------------------------------------------------------------------|-------------------|-------------------|
|                                                                        | top2lg2mean       | MAF               |
| top2lg2mean                                                            | 1.00000           | 0.14107<br>0.6619 |
| MAF                                                                    | 0.14107<br>0.6619 | 1.00000           |

**Pearson Correlation Statistics (Fisher's z Transformation)**

| Variable    | With Variable | N  | Sample Correlation | Fisher's z | Bias Adjustment | Correlation Estimate | 95% Confidence Limits |          | p Value for H0:Rho=0 |
|-------------|---------------|----|--------------------|------------|-----------------|----------------------|-----------------------|----------|----------------------|
| top2lg2mean | MAF           | 12 | 0.14107            | 0.14202    | 0.00641         | 0.13478              | -0.475937             | 0.657799 | 0.6701               |

**Correlation C\_pooltop2lg2mean\_tp2 symbol MAF**

**The CORR Procedure**

Gene\_Symbol=FBLN1

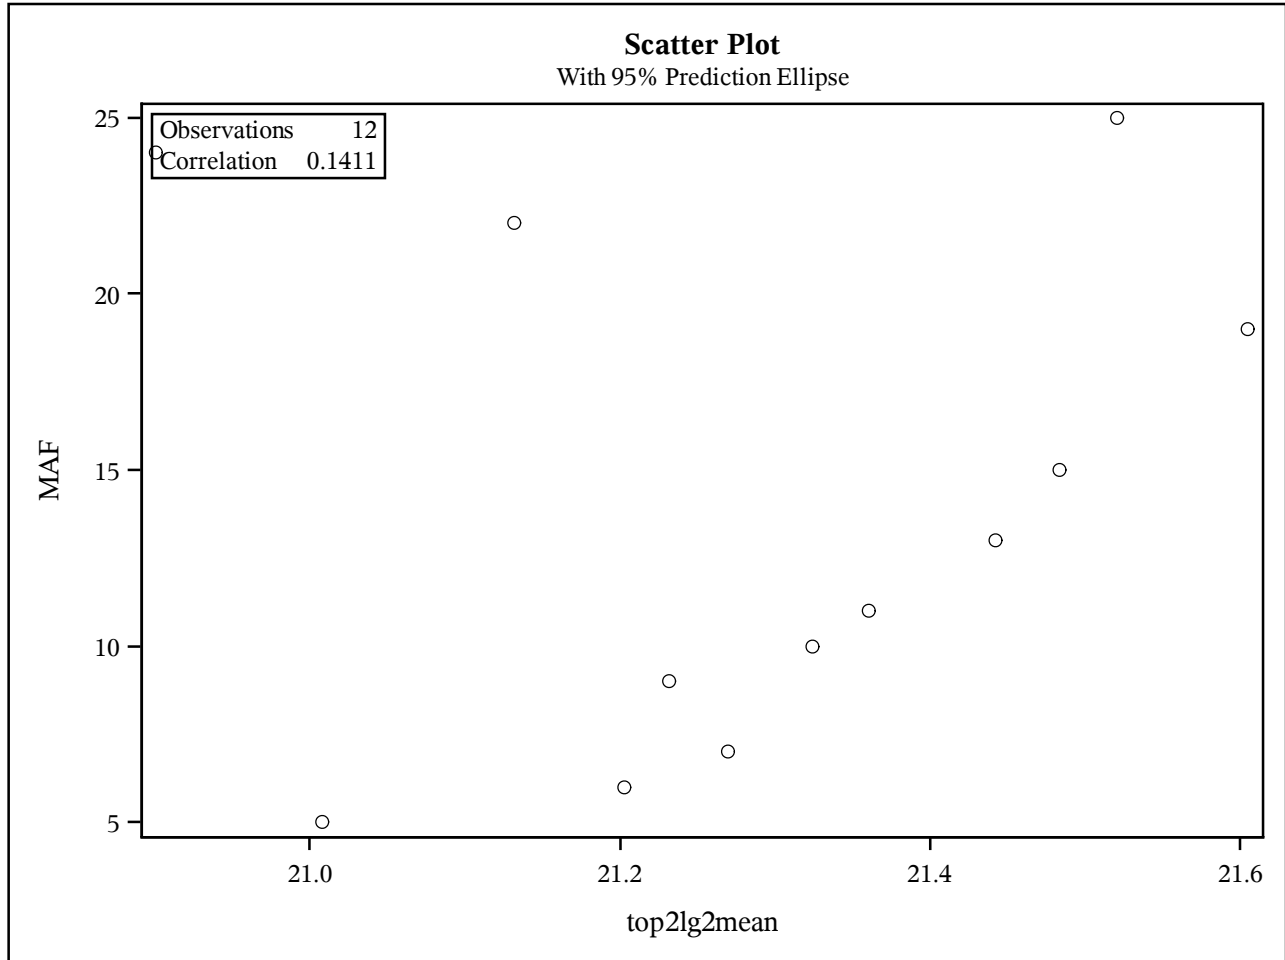

**Correlation C\_pooltop2lg2mean\_tp2 symbol MAF****The CORR Procedure**

Gene\_Symbol=FGG

2 Variables: top2lg2mean MAF

| Simple Statistics |    |          |         |           |          |          |
|-------------------|----|----------|---------|-----------|----------|----------|
| Variable          | N  | Mean     | Std Dev | Sum       | Minimum  | Maximum  |
| top2lg2mean       | 12 | 17.97301 | 0.39551 | 215.67613 | 17.49951 | 19.09702 |
| MAF               | 12 | 13.83333 | 7.10740 | 166.00000 | 5.00000  | 25.00000 |

| Pearson Correlation Coefficients, N = 12<br>Prob >  r  under H0: Rho=0 |                    |                    |
|------------------------------------------------------------------------|--------------------|--------------------|
|                                                                        | top2lg2mean        | MAF                |
| top2lg2mean                                                            | 1.00000            | -0.24364<br>0.4454 |
| MAF                                                                    | -0.24364<br>0.4454 | 1.00000            |

**Pearson Correlation Statistics (Fisher's z Transformation)**

| Variable    | With Variable | N  | Sample Correlation | Fisher's z | Bias Adjustment | Correlation Estimate | 95% Confidence Limits |          | p Value for H0:Rho=0 |
|-------------|---------------|----|--------------------|------------|-----------------|----------------------|-----------------------|----------|----------------------|
| top2lg2mean | MAF           | 12 | -0.24364           | -0.24864   | -0.01107        | -0.23319             | -0.711830             | 0.393352 | 0.4557               |

**Correlation C\_pooltop2lg2mean\_tp2 symbol MAF**

**The CORR Procedure**

Gene\_Symbol=FGG

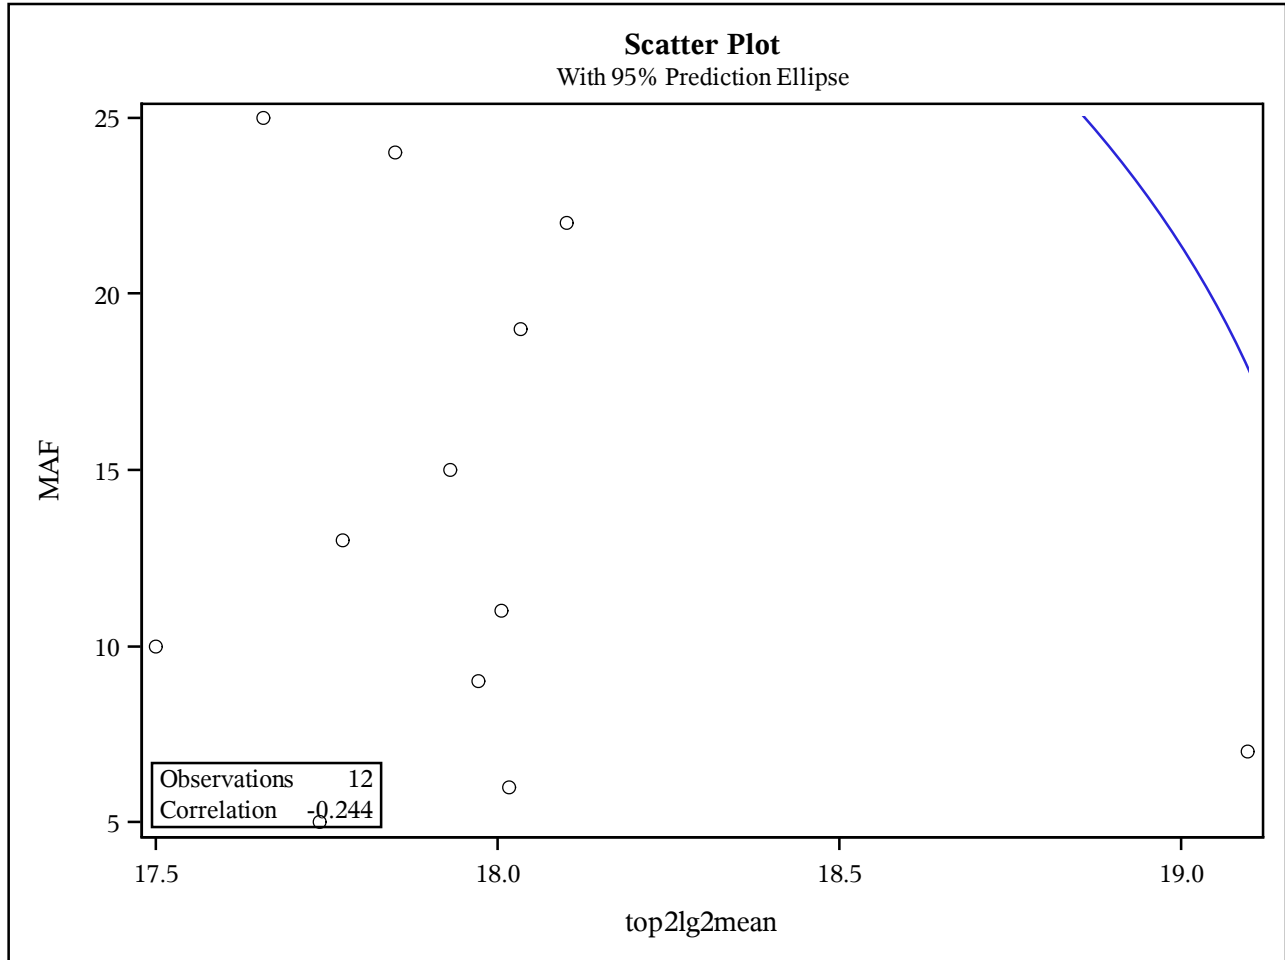



**Correlation C\_pooltop2lg2mean\_tp2 symbol MAF****The CORR Procedure**

Gene\_Symbol=FN1

2 Variables: top2lg2mean MAF

| Simple Statistics |    |          |         |           |          |          |
|-------------------|----|----------|---------|-----------|----------|----------|
| Variable          | N  | Mean     | Std Dev | Sum       | Minimum  | Maximum  |
| top2lg2mean       | 12 | 20.22242 | 0.38957 | 242.66899 | 19.48613 | 20.90945 |
| MAF               | 12 | 13.83333 | 7.10740 | 166.00000 | 5.00000  | 25.00000 |

| Pearson Correlation Coefficients, N = 12<br>Prob >  r  under H0: Rho=0 |                   |                   |
|------------------------------------------------------------------------|-------------------|-------------------|
|                                                                        | top2lg2mean       | MAF               |
| top2lg2mean                                                            | 1.00000           | 0.67285<br>0.0165 |
| MAF                                                                    | 0.67285<br>0.0165 | 1.00000           |

**Pearson Correlation Statistics (Fisher's z Transformation)**

| Variable    | With Variable | N  | Sample Correlation | Fisher's z | Bias Adjustment | Correlation Estimate | 95% Confidence Limits |          | p Value for H0:Rho=0 |
|-------------|---------------|----|--------------------|------------|-----------------|----------------------|-----------------------|----------|----------------------|
| top2lg2mean | MAF           | 12 | 0.67285            | 0.81594    | 0.03058         | 0.65577              | 0.131272              | 0.893431 | 0.0144               |

**Correlation C\_pooltop2lg2mean\_tp2 symbol MAF**

**The CORR Procedure**

Gene\_Symbol=FN1

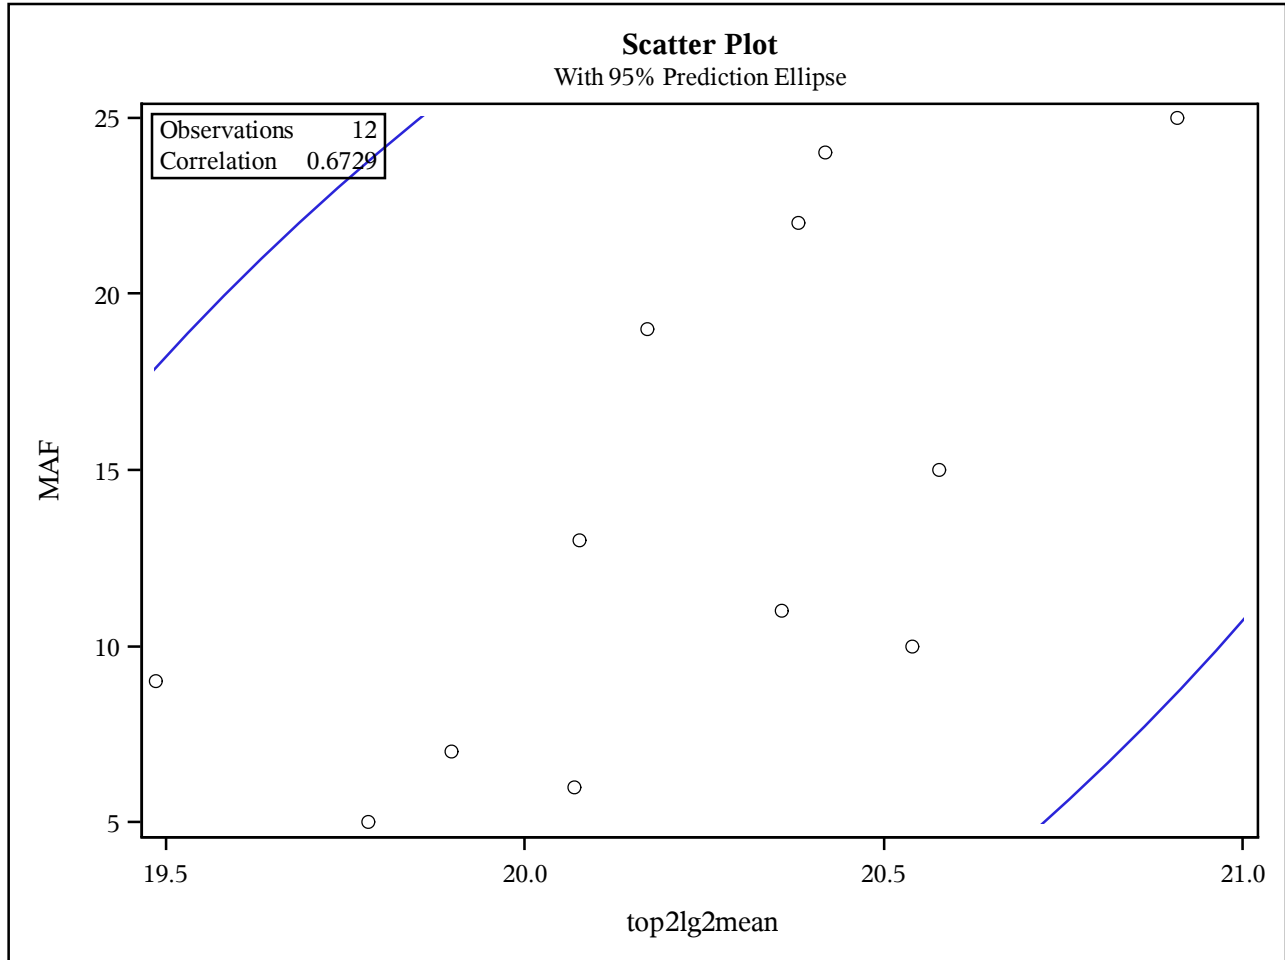

**Correlation C\_pooltop2lg2mean\_tp2 symbol MAF****The CORR Procedure**

Gene\_Symbol=GC

2 Variables: top2lg2mean MAF

| Simple Statistics |    |          |         |           |          |          |
|-------------------|----|----------|---------|-----------|----------|----------|
| Variable          | N  | Mean     | Std Dev | Sum       | Minimum  | Maximum  |
| top2lg2mean       | 12 | 23.33209 | 0.20100 | 279.98510 | 22.82401 | 23.60913 |
| MAF               | 12 | 13.83333 | 7.10740 | 166.00000 | 5.00000  | 25.00000 |

| Pearson Correlation Coefficients, N = 12<br>Prob >  r  under H0: Rho=0 |                   |                   |
|------------------------------------------------------------------------|-------------------|-------------------|
|                                                                        | top2lg2mean       | MAF               |
| top2lg2mean                                                            | 1.00000           | 0.49518<br>0.1017 |
| MAF                                                                    | 0.49518<br>0.1017 | 1.00000           |

**Pearson Correlation Statistics (Fisher's z Transformation)**

| Variable    | With Variable | N  | Sample Correlation | Fisher's z | Bias Adjustment | Correlation Estimate | 95% Confidence Limits |          | p Value for H0:Rho=0 |
|-------------|---------------|----|--------------------|------------|-----------------|----------------------|-----------------------|----------|----------------------|
| top2lg2mean | MAF           | 12 | 0.49518            | 0.54290    | 0.02251         | 0.47800              | -0.132150             | 0.825460 | 0.1034               |

**Correlation  $C_{pooltop2lg2mean\_tp2}$  symbol MAF****The CORR Procedure**

Gene\_Symbol=GC

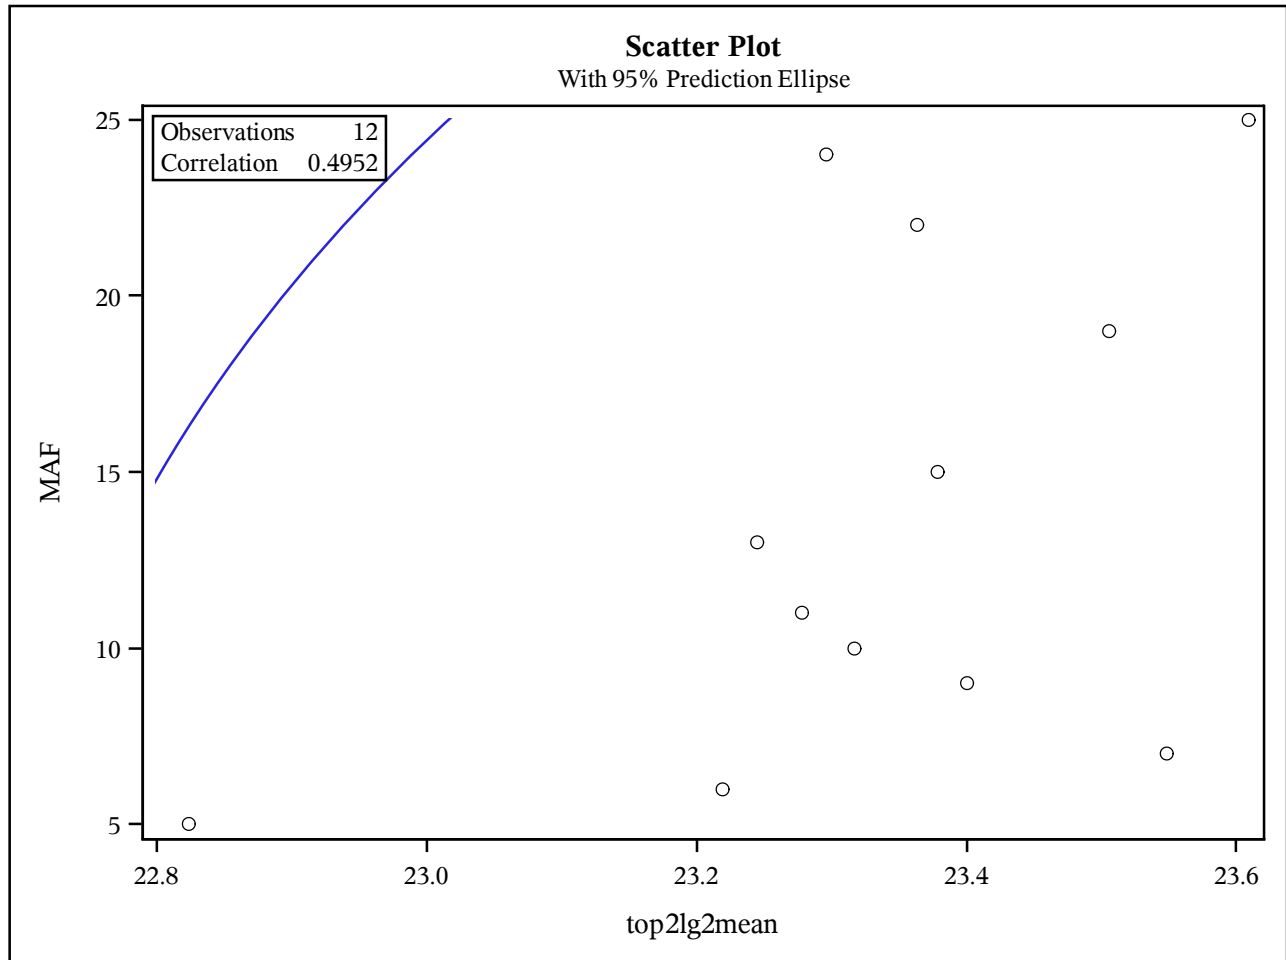

**Correlation C\_pooltop2lg2mean\_tp2 symbol MAF****The CORR Procedure**

Gene\_Symbol=GSN

2 Variables: top2lg2mean MAF

| Simple Statistics |    |          |         |           |          |          |
|-------------------|----|----------|---------|-----------|----------|----------|
| Variable          | N  | Mean     | Std Dev | Sum       | Minimum  | Maximum  |
| top2lg2mean       | 12 | 21.67081 | 0.34197 | 260.04974 | 20.77562 | 21.98326 |
| MAF               | 12 | 13.83333 | 7.10740 | 166.00000 | 5.00000  | 25.00000 |

| Pearson Correlation Coefficients, N = 12<br>Prob >  r  under H0: Rho=0 |                    |                    |
|------------------------------------------------------------------------|--------------------|--------------------|
|                                                                        | top2lg2mean        | MAF                |
| top2lg2mean                                                            | 1.00000            | -0.50583<br>0.0934 |
| MAF                                                                    | -0.50583<br>0.0934 | 1.00000            |

**Pearson Correlation Statistics (Fisher's z Transformation)**

| Variable    | With Variable | N  | Sample Correlation | Fisher's z | Bias Adjustment | Correlation Estimate | 95% Confidence Limits |          | p Value for H0:Rho=0 |
|-------------|---------------|----|--------------------|------------|-----------------|----------------------|-----------------------|----------|----------------------|
| top2lg2mean | MAF           | 12 | -0.50583           | -0.55711   | -0.02299        | -0.48853             | -0.829784             | 0.118638 | 0.0947               |

**Correlation C\_pooltop2lg2mean\_tp2 symbol MAF**

**The CORR Procedure**

Gene\_Symbol=GSN

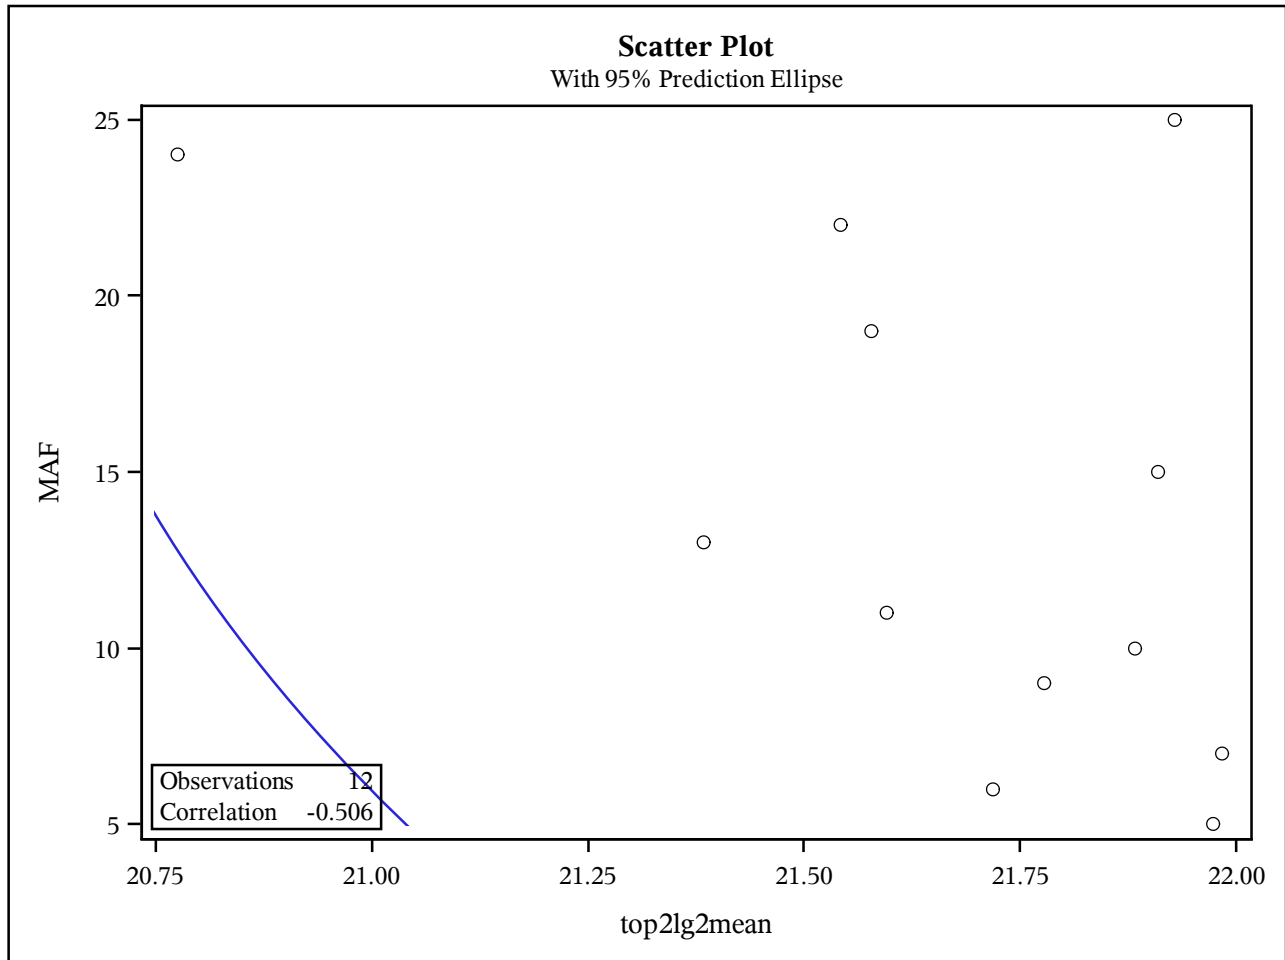

**Correlation C\_pooltop2lg2mean\_tp2 symbol MAF****The CORR Procedure**

Gene\_Symbol=HPX

2 Variables: top2lg2mean MAF

| Simple Statistics |    |          |         |           |          |          |
|-------------------|----|----------|---------|-----------|----------|----------|
| Variable          | N  | Mean     | Std Dev | Sum       | Minimum  | Maximum  |
| top2lg2mean       | 12 | 25.81965 | 0.13873 | 309.83584 | 25.65299 | 26.07131 |
| MAF               | 12 | 13.83333 | 7.10740 | 166.00000 | 5.00000  | 25.00000 |

| Pearson Correlation Coefficients, N = 12<br>Prob >  r  under H0: Rho=0 |                    |                    |
|------------------------------------------------------------------------|--------------------|--------------------|
|                                                                        | top2lg2mean        | MAF                |
| top2lg2mean                                                            | 1.00000            | -0.01345<br>0.9669 |
| MAF                                                                    | -0.01345<br>0.9669 | 1.00000            |

**Pearson Correlation Statistics (Fisher's z Transformation)**

| Variable    | With Variable | N  | Sample Correlation | Fisher's z | Bias Adjustment | Correlation Estimate | 95% Confidence Limits |          | p Value for H0:Rho=0 |
|-------------|---------------|----|--------------------|------------|-----------------|----------------------|-----------------------|----------|----------------------|
| top2lg2mean | MAF           | 12 | -0.01345           | -0.01345   | -0.0006112      | -0.01284             | -0.582447             | 0.565230 | 0.9678               |

**Correlation C\_pooltop2lg2mean\_tp2 symbol MAF**

**The CORR Procedure**

Gene\_Symbol=HPX

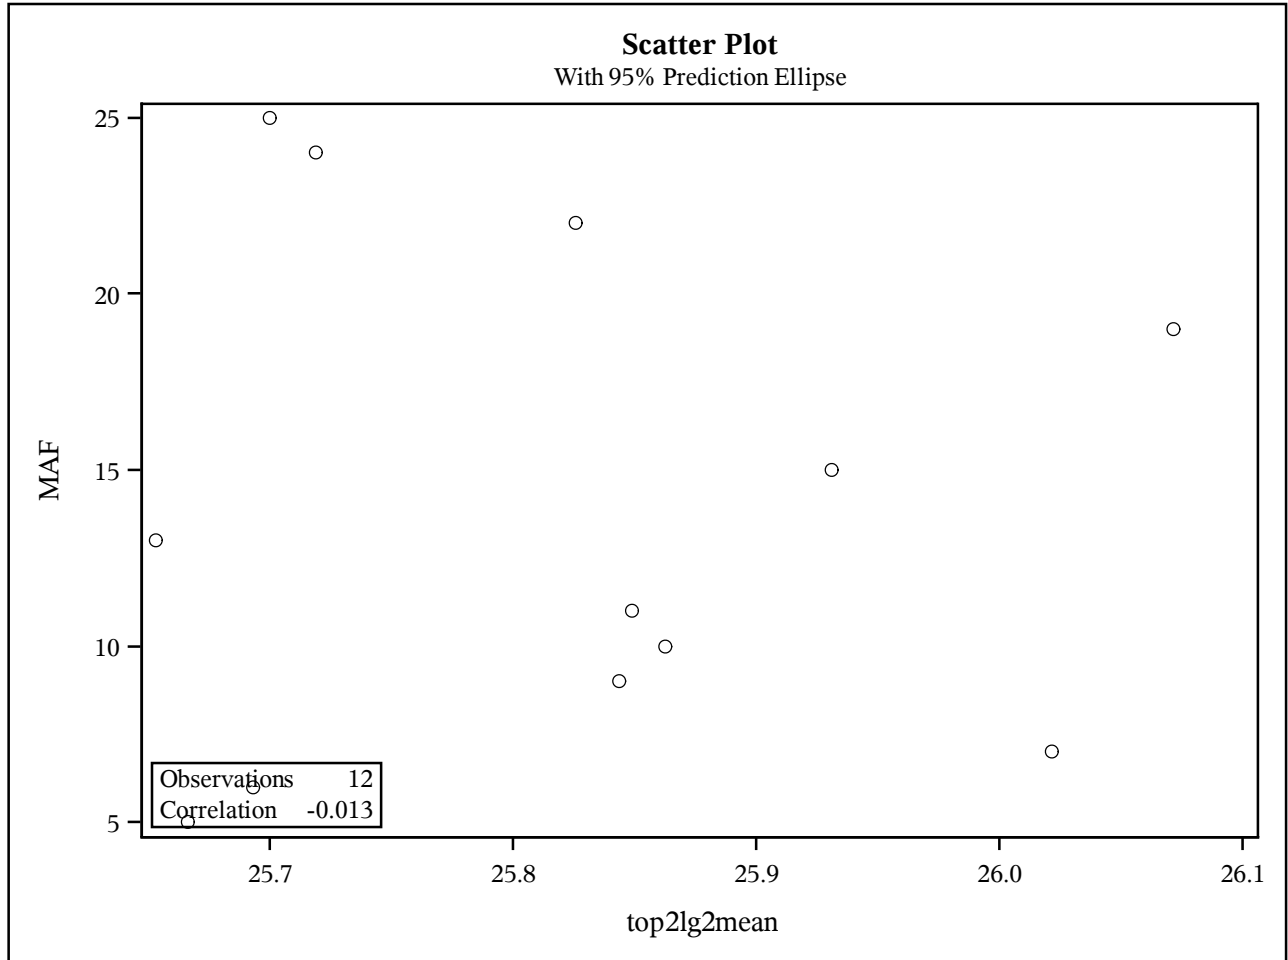



**Correlation C\_pooltop2lg2mean\_tp2 symbol MAF****The CORR Procedure**

Gene\_Symbol=IGFBP6

2 Variables: top2lg2mean MAF

| Simple Statistics |    |          |         |           |          |          |
|-------------------|----|----------|---------|-----------|----------|----------|
| Variable          | N  | Mean     | Std Dev | Sum       | Minimum  | Maximum  |
| top2lg2mean       | 12 | 21.76537 | 0.24356 | 261.18448 | 21.06331 | 22.01586 |
| MAF               | 12 | 13.83333 | 7.10740 | 166.00000 | 5.00000  | 25.00000 |

| Pearson Correlation Coefficients, N = 12<br>Prob >  r  under H0: Rho=0 |                   |                   |
|------------------------------------------------------------------------|-------------------|-------------------|
|                                                                        | top2lg2mean       | MAF               |
| top2lg2mean                                                            | 1.00000           | 0.39640<br>0.2021 |
| MAF                                                                    | 0.39640<br>0.2021 | 1.00000           |

**Pearson Correlation Statistics (Fisher's z Transformation)**

| Variable    | With Variable | N  | Sample Correlation | Fisher's z | Bias Adjustment | Correlation Estimate | 95% Confidence Limits |          | p Value for H0:Rho=0 |
|-------------|---------------|----|--------------------|------------|-----------------|----------------------|-----------------------|----------|----------------------|
| top2lg2mean | MAF           | 12 | 0.39640            | 0.41937    | 0.01802         | 0.38110              | -0.246773             | 0.783615 | 0.2084               |

**Correlation  $C_{pooltop2lg2mean\_tp2}$  symbol MAF****The CORR Procedure**

Gene\_Symbol=IGFBP6

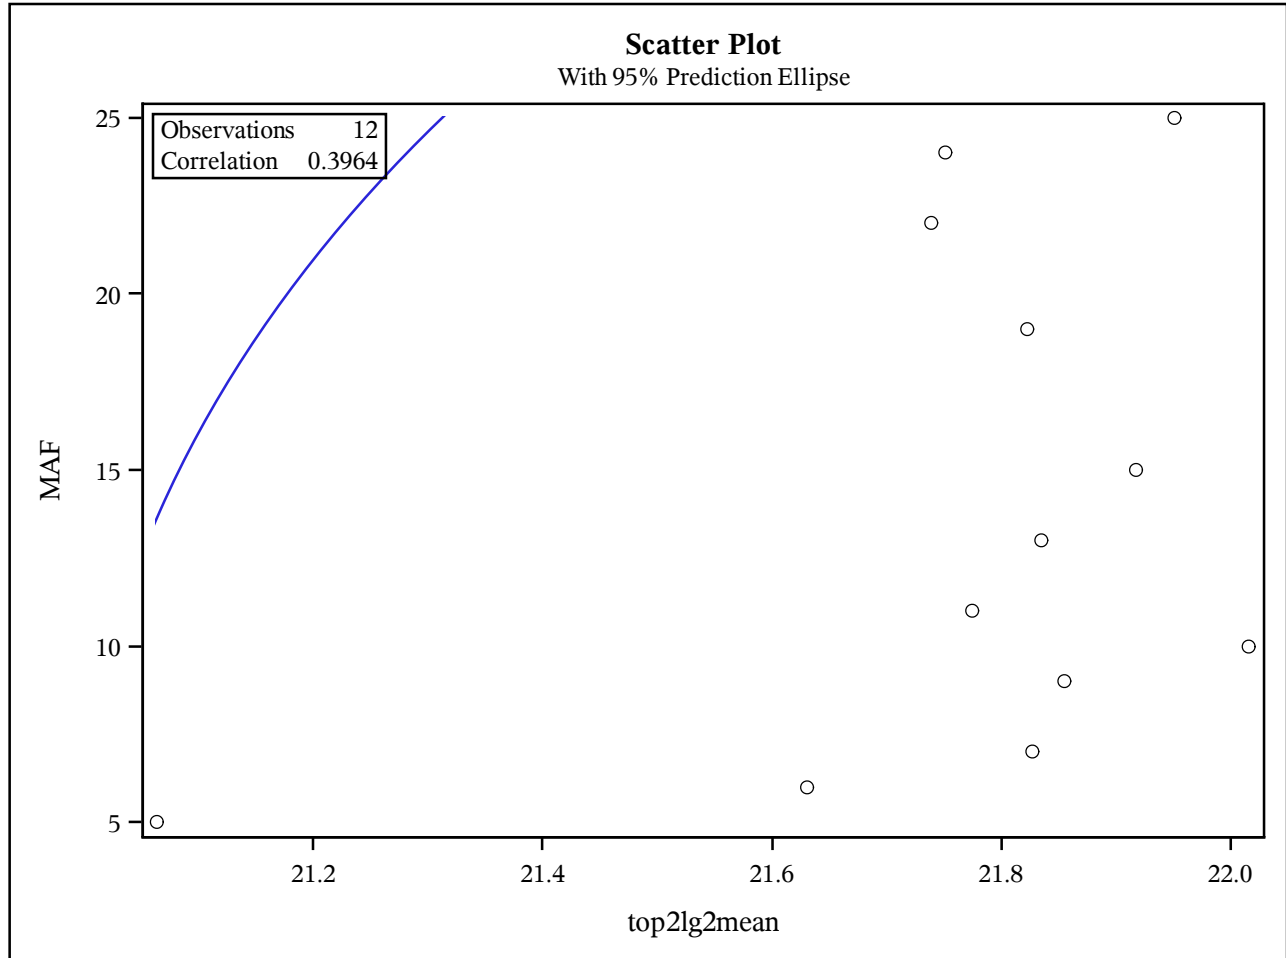

**Correlation C\_pooltop2lg2mean\_tp2 symbol MAF****The CORR Procedure**

Gene\_Symbol=KLK6

2 Variables: top2lg2mean MAF

| Simple Statistics |    |          |         |           |          |          |
|-------------------|----|----------|---------|-----------|----------|----------|
| Variable          | N  | Mean     | Std Dev | Sum       | Minimum  | Maximum  |
| top2lg2mean       | 12 | 23.33664 | 0.20344 | 280.03972 | 23.06448 | 23.67569 |
| MAF               | 12 | 13.83333 | 7.10740 | 166.00000 | 5.00000  | 25.00000 |

| Pearson Correlation Coefficients, N = 12<br>Prob >  r  under H0: Rho=0 |                   |                   |
|------------------------------------------------------------------------|-------------------|-------------------|
|                                                                        | top2lg2mean       | MAF               |
| top2lg2mean                                                            | 1.00000           | 0.27600<br>0.3852 |
| MAF                                                                    | 0.27600<br>0.3852 | 1.00000           |

**Pearson Correlation Statistics (Fisher's z Transformation)**

| Variable    | With Variable | N  | Sample Correlation | Fisher's z | Bias Adjustment | Correlation Estimate | 95% Confidence Limits |          | p Value for H0:Rho=0 |
|-------------|---------------|----|--------------------|------------|-----------------|----------------------|-----------------------|----------|----------------------|
| top2lg2mean | MAF           | 12 | 0.27600            | 0.28334    | 0.01255         | 0.26437              | -0.364896             | 0.727841 | 0.3953               |

**Correlation  $C_{pooltop2lg2mean\_tp2}$  symbol MAF****The CORR Procedure**

Gene\_Symbol=KLK6

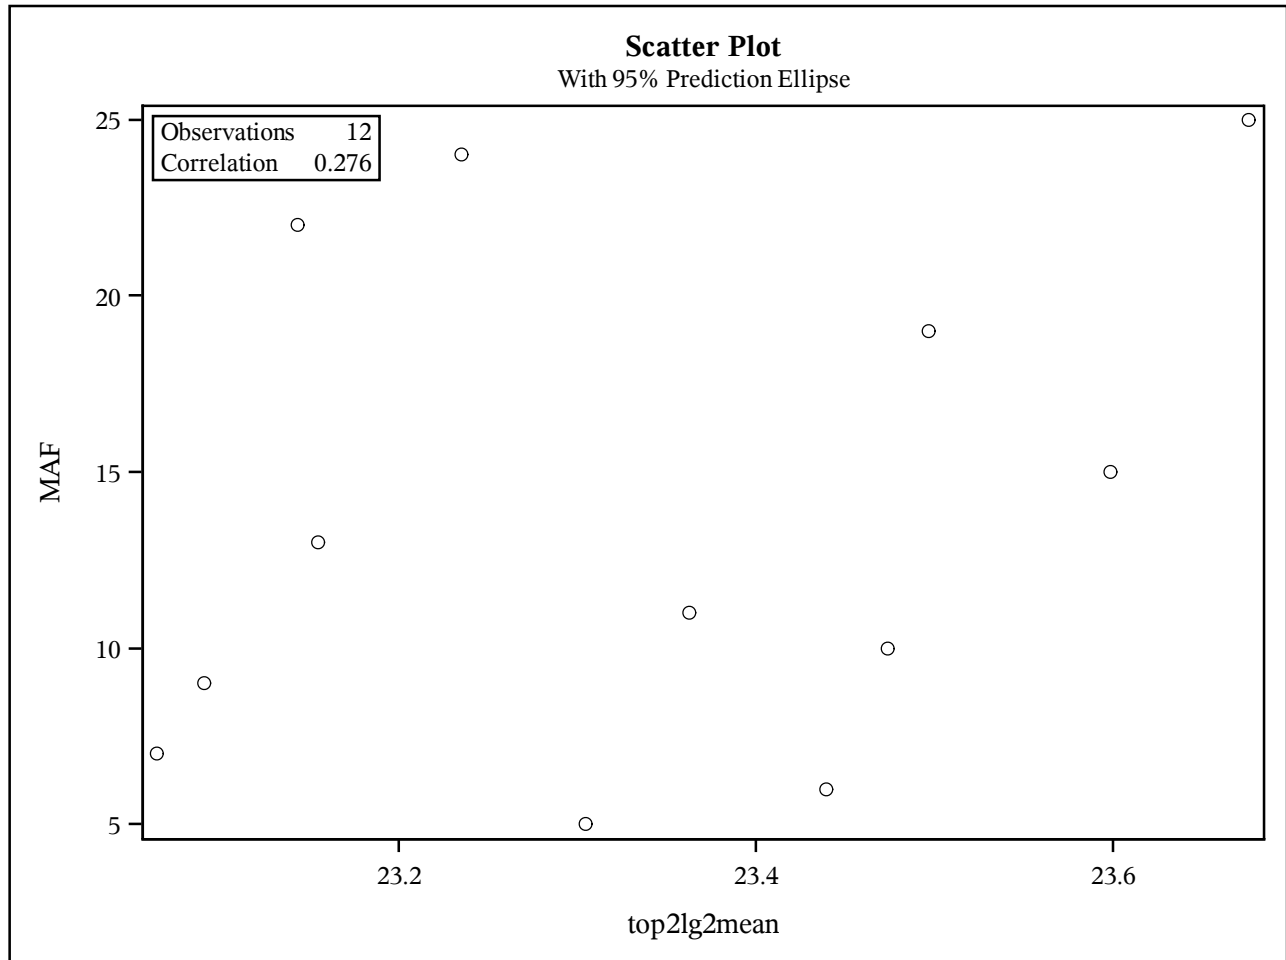

**Correlation C\_pooltop2lg2mean\_tp2 symbol MAF****The CORR Procedure**

Gene\_Symbol=KNG1

2 Variables: top2lg2mean MAF

| Simple Statistics |    |          |         |           |          |          |
|-------------------|----|----------|---------|-----------|----------|----------|
| Variable          | N  | Mean     | Std Dev | Sum       | Minimum  | Maximum  |
| top2lg2mean       | 12 | 19.99606 | 0.33916 | 239.95268 | 19.18894 | 20.32536 |
| MAF               | 12 | 13.83333 | 7.10740 | 166.00000 | 5.00000  | 25.00000 |

| Pearson Correlation Coefficients, N = 12<br>Prob >  r  under H0: Rho=0 |                   |                   |
|------------------------------------------------------------------------|-------------------|-------------------|
|                                                                        | top2lg2mean       | MAF               |
| top2lg2mean                                                            | 1.00000           | 0.39838<br>0.1996 |
| MAF                                                                    | 0.39838<br>0.1996 | 1.00000           |

**Pearson Correlation Statistics (Fisher's z Transformation)**

| Variable    | With Variable | N  | Sample Correlation | Fisher's z | Bias Adjustment | Correlation Estimate | 95% Confidence Limits |          | p Value for H0:Rho=0 |
|-------------|---------------|----|--------------------|------------|-----------------|----------------------|-----------------------|----------|----------------------|
| top2lg2mean | MAF           | 12 | 0.39838            | 0.42172    | 0.01811         | 0.38303              | -0.244647             | 0.784487 | 0.2058               |

**Correlation C\_pooltop2lg2mean\_tp2 symbol MAF**

**The CORR Procedure**

Gene\_Symbol=KNG1

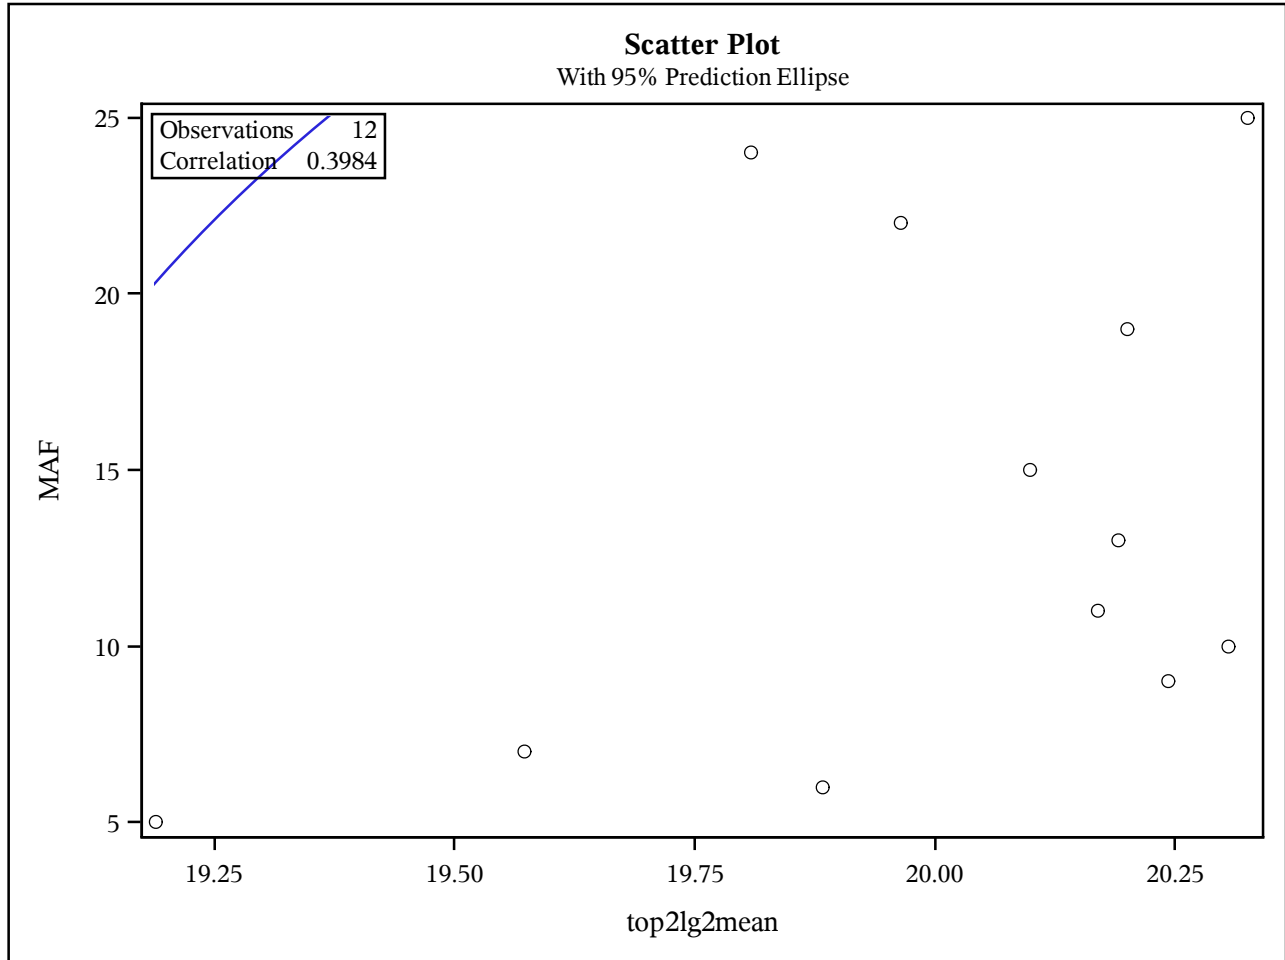

**Correlation C\_pooltop2lg2mean\_tp2 symbol MAF****The CORR Procedure**

Gene\_Symbol=LGALS3BP

2 Variables: top2lg2mean MAF

| Simple Statistics |    |          |         |           |          |          |
|-------------------|----|----------|---------|-----------|----------|----------|
| Variable          | N  | Mean     | Std Dev | Sum       | Minimum  | Maximum  |
| top2lg2mean       | 12 | 19.05697 | 0.50398 | 228.68362 | 18.42866 | 19.85145 |
| MAF               | 12 | 13.83333 | 7.10740 | 166.00000 | 5.00000  | 25.00000 |

| Pearson Correlation Coefficients, N = 12<br>Prob >  r  under H0: Rho=0 |                   |                   |
|------------------------------------------------------------------------|-------------------|-------------------|
|                                                                        | top2lg2mean       | MAF               |
| top2lg2mean                                                            | 1.00000           | 0.06263<br>0.8467 |
| MAF                                                                    | 0.06263<br>0.8467 | 1.00000           |

**Pearson Correlation Statistics (Fisher's z Transformation)**

| Variable    | With Variable | N  | Sample Correlation | Fisher's z | Bias Adjustment | Correlation Estimate | 95% Confidence Limits |          | p Value for H0:Rho=0 |
|-------------|---------------|----|--------------------|------------|-----------------|----------------------|-----------------------|----------|----------------------|
| top2lg2mean | MAF           | 12 | 0.06263            | 0.06272    | 0.00285         | 0.05980              | -0.532374             | 0.612674 | 0.8508               |

**Correlation C\_pooltop2lg2mean\_tp2 symbol MAF****The CORR Procedure**

Gene\_Symbol=LGALS3BP

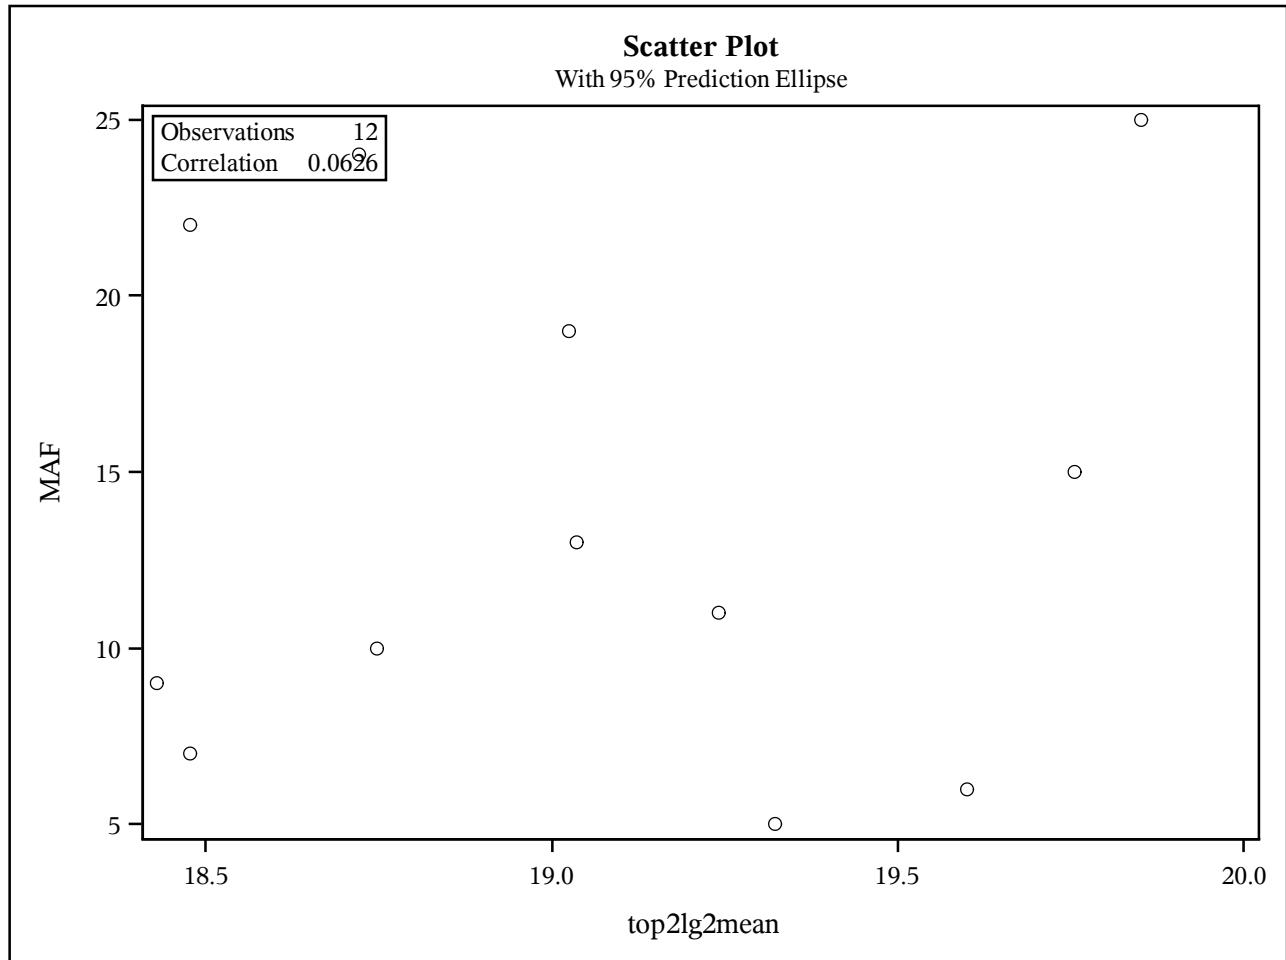



**Correlation C\_pooltop2lg2mean\_tp2 symbol MAF****The CORR Procedure**

Gene\_Symbol=LRG1

2 Variables: top2lg2mean MAF

| Simple Statistics |    |          |         |           |          |          |
|-------------------|----|----------|---------|-----------|----------|----------|
| Variable          | N  | Mean     | Std Dev | Sum       | Minimum  | Maximum  |
| top2lg2mean       | 12 | 21.04480 | 0.32579 | 252.53765 | 20.54096 | 21.57320 |
| MAF               | 12 | 13.83333 | 7.10740 | 166.00000 | 5.00000  | 25.00000 |

| Pearson Correlation Coefficients, N = 12<br>Prob >  r  under H0: Rho=0 |                   |                   |
|------------------------------------------------------------------------|-------------------|-------------------|
|                                                                        | top2lg2mean       | MAF               |
| top2lg2mean                                                            | 1.00000           | 0.17021<br>0.5969 |
| MAF                                                                    | 0.17021<br>0.5969 | 1.00000           |

**Pearson Correlation Statistics (Fisher's z Transformation)**

| Variable    | With Variable | N  | Sample Correlation | Fisher's z | Bias Adjustment | Correlation Estimate | 95% Confidence Limits |          | p Value for H0:Rho=0 |
|-------------|---------------|----|--------------------|------------|-----------------|----------------------|-----------------------|----------|----------------------|
| top2lg2mean | MAF           | 12 | 0.17021            | 0.17188    | 0.00774         | 0.16268              | -0.453564             | 0.673687 | 0.6061               |

**Correlation  $C_{pooltop2lg2mean\_tp2}$  symbol MAF****The CORR Procedure**

Gene\_Symbol=LRG1

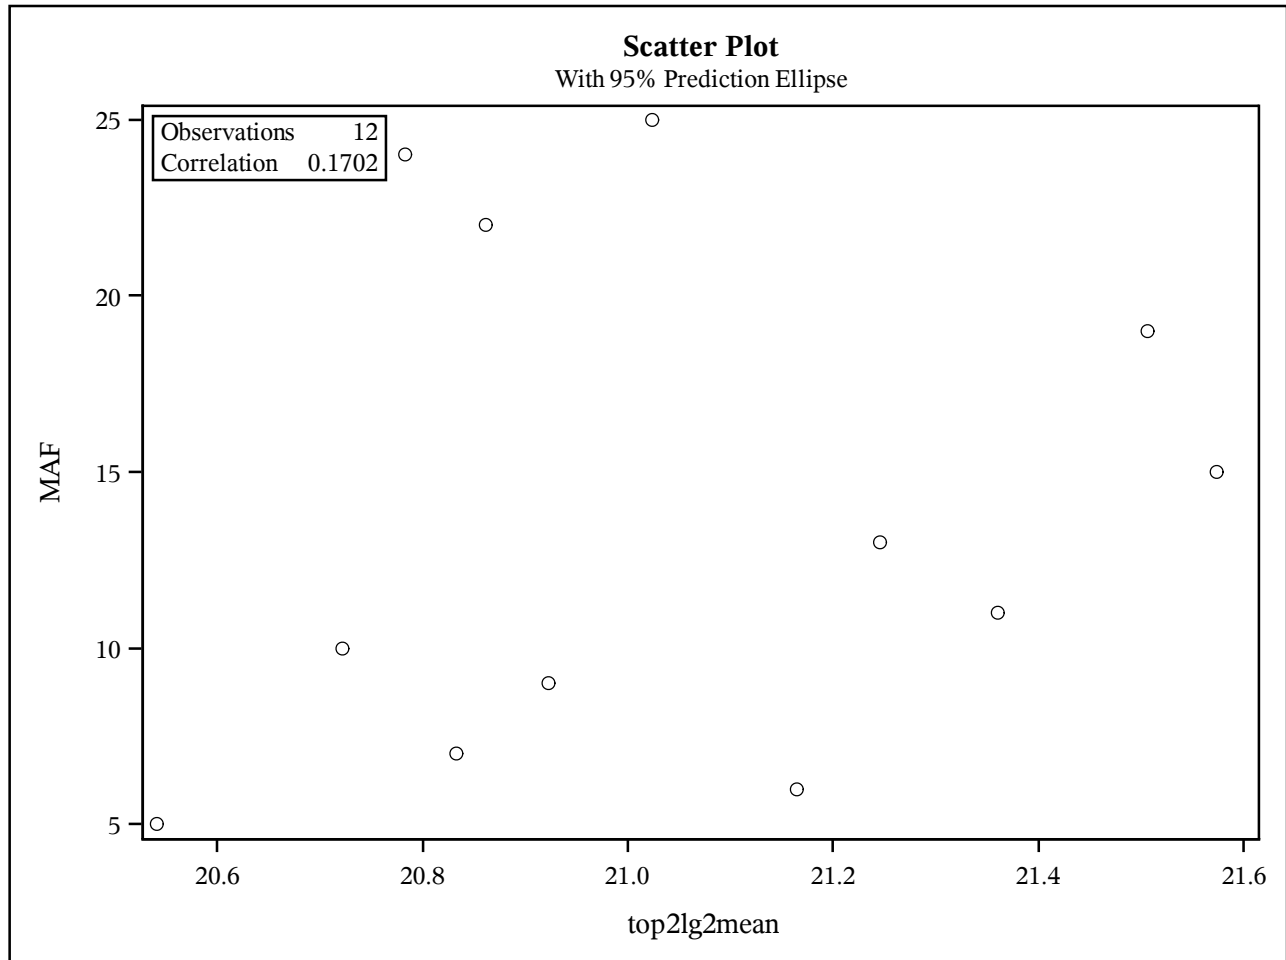

**Correlation C\_pooltop2lg2mean\_tp2 symbol MAF****The CORR Procedure**

Gene\_Symbol=NCAM1

2 Variables: top2lg2mean MAF

| Simple Statistics |    |          |         |           |          |          |
|-------------------|----|----------|---------|-----------|----------|----------|
| Variable          | N  | Mean     | Std Dev | Sum       | Minimum  | Maximum  |
| top2lg2mean       | 12 | 20.08905 | 0.30789 | 241.06857 | 19.47076 | 20.43145 |
| MAF               | 12 | 13.83333 | 7.10740 | 166.00000 | 5.00000  | 25.00000 |

| Pearson Correlation Coefficients, N = 12<br>Prob >  r  under H0: Rho=0 |                    |                    |
|------------------------------------------------------------------------|--------------------|--------------------|
|                                                                        | top2lg2mean        | MAF                |
| top2lg2mean                                                            | 1.00000            | -0.09329<br>0.7731 |
| MAF                                                                    | -0.09329<br>0.7731 | 1.00000            |

**Pearson Correlation Statistics (Fisher's z Transformation)**

| Variable    | With Variable | N  | Sample Correlation | Fisher's z | Bias Adjustment | Correlation Estimate | 95% Confidence Limits |          | p Value for H0:Rho=0 |
|-------------|---------------|----|--------------------|------------|-----------------|----------------------|-----------------------|----------|----------------------|
| top2lg2mean | MAF           | 12 | -0.09329           | -0.09356   | -0.00424        | -0.08909             | -0.630740             | 0.510939 | 0.7789               |

**Correlation C\_pooltop2lg2mean\_tp2 symbol MAF**

**The CORR Procedure**

**Gene\_Symbol=NCAM1**

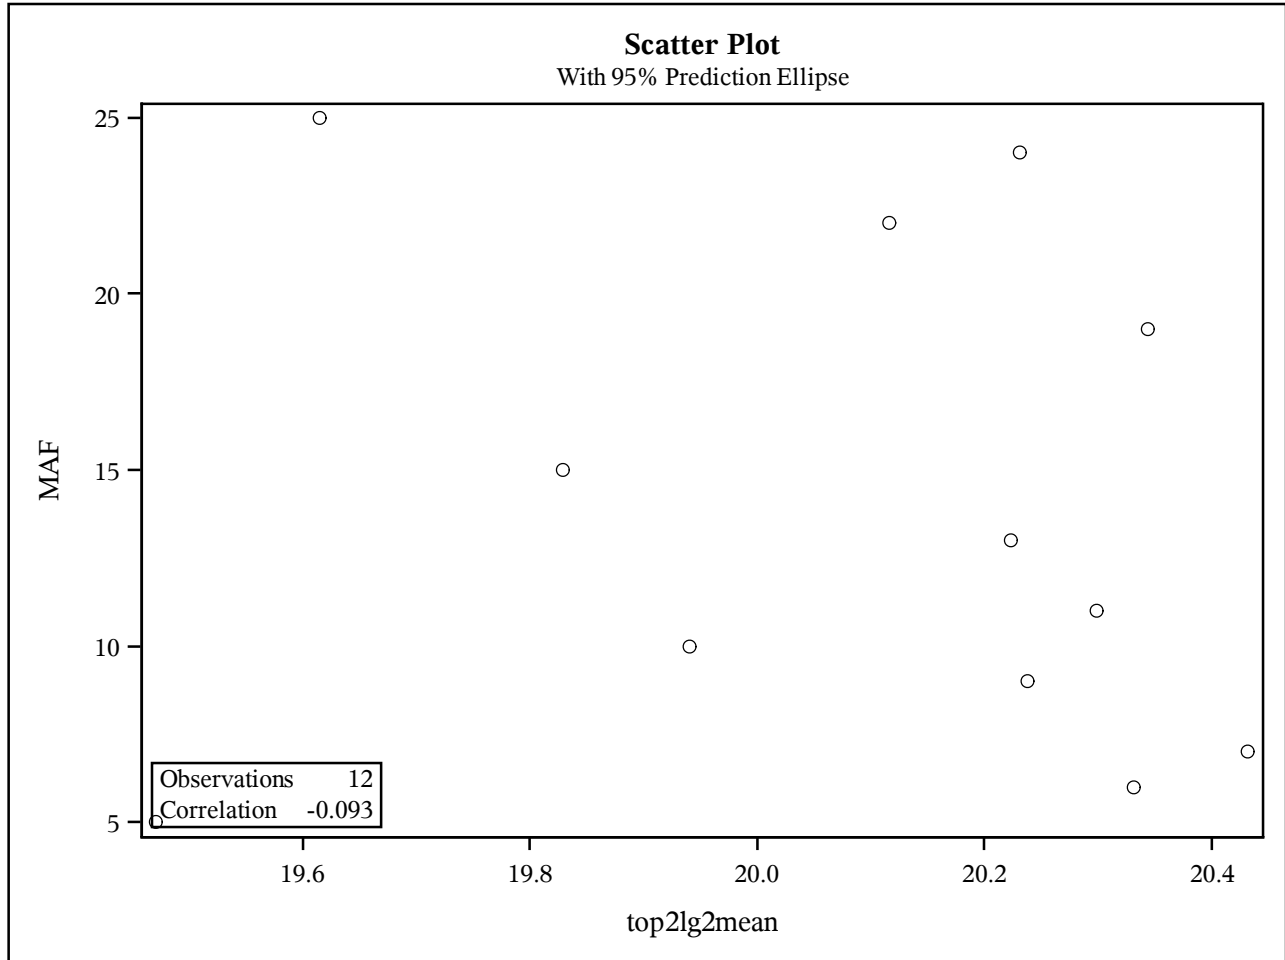

**Correlation C\_pooltop2lg2mean\_tp2 symbol MAF****The CORR Procedure**

Gene\_Symbol=NCAN

2 Variables: top2lg2mean MAF

| Simple Statistics |    |          |         |           |          |          |
|-------------------|----|----------|---------|-----------|----------|----------|
| Variable          | N  | Mean     | Std Dev | Sum       | Minimum  | Maximum  |
| top2lg2mean       | 12 | 17.41564 | 0.26096 | 208.98771 | 16.95932 | 17.82961 |
| MAF               | 12 | 13.83333 | 7.10740 | 166.00000 | 5.00000  | 25.00000 |

| Pearson Correlation Coefficients, N = 12<br>Prob >  r  under H0: Rho=0 |                    |                    |
|------------------------------------------------------------------------|--------------------|--------------------|
|                                                                        | top2lg2mean        | MAF                |
| top2lg2mean                                                            | 1.00000            | -0.28205<br>0.3744 |
| MAF                                                                    | -0.28205<br>0.3744 | 1.00000            |

**Pearson Correlation Statistics (Fisher's z Transformation)**

| Variable    | With Variable | N  | Sample Correlation | Fisher's z | Bias Adjustment | Correlation Estimate | 95% Confidence Limits |          | p Value for H0:Rho=0 |
|-------------|---------------|----|--------------------|------------|-----------------|----------------------|-----------------------|----------|----------------------|
| top2lg2mean | MAF           | 12 | -0.28205           | -0.28991   | -0.01282        | -0.27021             | -0.730785             | 0.359432 | 0.3845               |

**Correlation C\_pooltop2lg2mean\_tp2 symbol MAF****The CORR Procedure**

Gene\_Symbol=NCAN

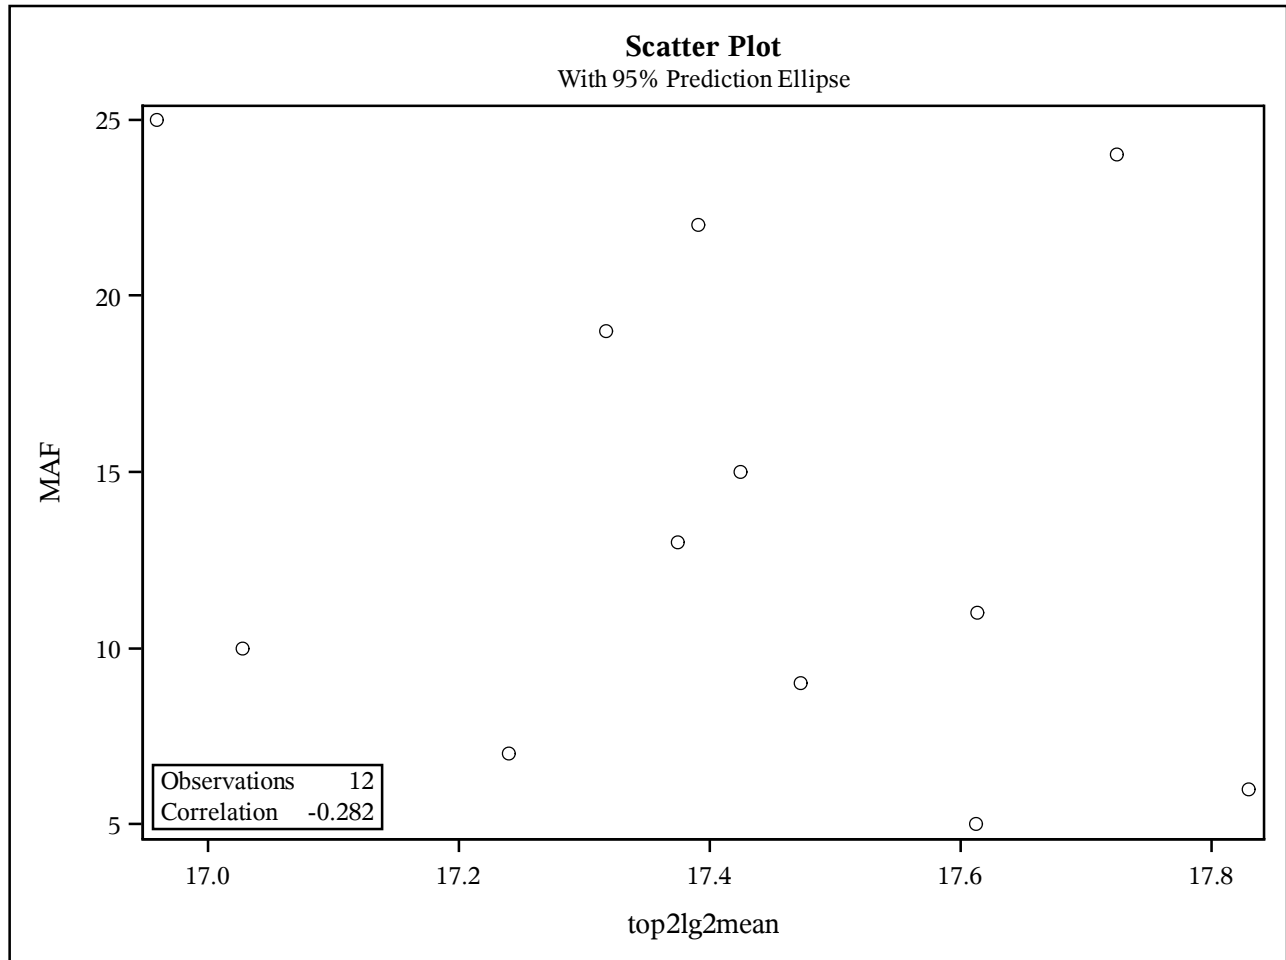

**Correlation C\_pooltop2lg2mean\_tp2 symbol MAF****The CORR Procedure**

Gene\_Symbol=NELL2

2 Variables: top2lg2mean MAF

| Simple Statistics |    |          |         |           |          |          |
|-------------------|----|----------|---------|-----------|----------|----------|
| Variable          | N  | Mean     | Std Dev | Sum       | Minimum  | Maximum  |
| top2lg2mean       | 12 | 19.96714 | 0.43713 | 239.60562 | 19.30654 | 20.90915 |
| MAF               | 12 | 13.83333 | 7.10740 | 166.00000 | 5.00000  | 25.00000 |

| Pearson Correlation Coefficients, N = 12<br>Prob >  r  under H0: Rho=0 |                    |                    |
|------------------------------------------------------------------------|--------------------|--------------------|
|                                                                        | top2lg2mean        | MAF                |
| top2lg2mean                                                            | 1.00000            | -0.62021<br>0.0314 |
| MAF                                                                    | -0.62021<br>0.0314 | 1.00000            |

**Pearson Correlation Statistics (Fisher's z Transformation)**

| Variable    | With Variable | N  | Sample Correlation | Fisher's z | Bias Adjustment | Correlation Estimate | 95% Confidence Limits |           | p Value for H0:Rho=0 |
|-------------|---------------|----|--------------------|------------|-----------------|----------------------|-----------------------|-----------|----------------------|
| top2lg2mean | MAF           | 12 | -0.62021           | -0.72534   | -0.02819        | -0.60256             | -0.874165             | -0.043801 | 0.0296               |

**Correlation  $C_{pooltop2lg2mean\_tp2}$  symbol MAF****The CORR Procedure**

Gene\_Symbol=NELL2

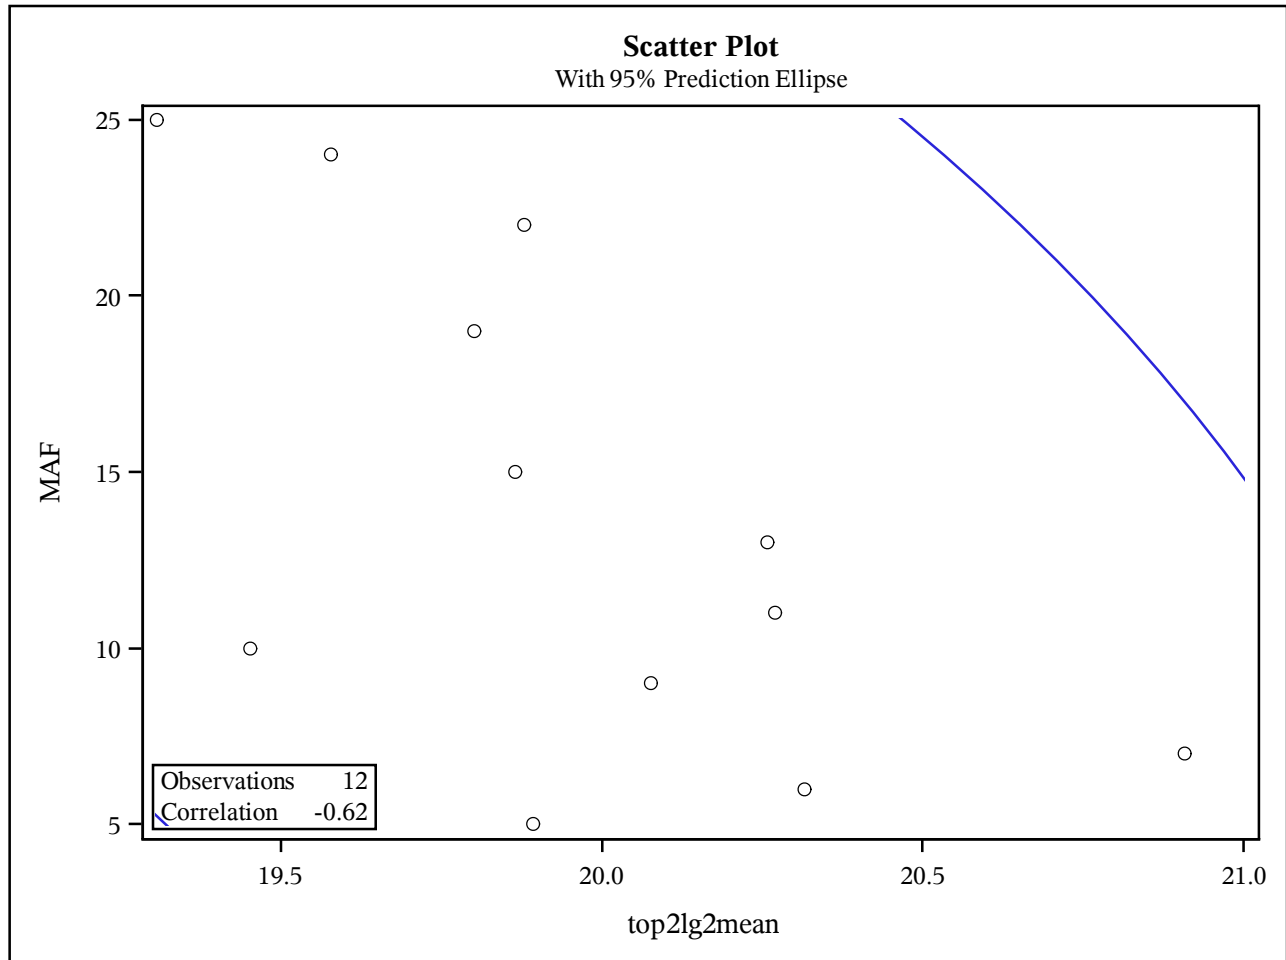



**Correlation C\_pooltop2lg2mean\_tp2 symbol MAF****The CORR Procedure**

Gene\_Symbol=NEO1

2 Variables: top2lg2mean MAF

| Simple Statistics |    |          |         |           |          |          |
|-------------------|----|----------|---------|-----------|----------|----------|
| Variable          | N  | Mean     | Std Dev | Sum       | Minimum  | Maximum  |
| top2lg2mean       | 12 | 18.63564 | 0.41217 | 223.62765 | 17.85830 | 19.26165 |
| MAF               | 12 | 13.83333 | 7.10740 | 166.00000 | 5.00000  | 25.00000 |

| Pearson Correlation Coefficients, N = 12<br>Prob >  r  under H0: Rho=0 |                   |                   |
|------------------------------------------------------------------------|-------------------|-------------------|
|                                                                        | top2lg2mean       | MAF               |
| top2lg2mean                                                            | 1.00000           | 0.23728<br>0.4577 |
| MAF                                                                    | 0.23728<br>0.4577 | 1.00000           |

**Pearson Correlation Statistics (Fisher's z Transformation)**

| Variable    | With Variable | N  | Sample Correlation | Fisher's z | Bias Adjustment | Correlation Estimate | 95% Confidence Limits |          | p Value for H0:Rho=0 |
|-------------|---------------|----|--------------------|------------|-----------------|----------------------|-----------------------|----------|----------------------|
| top2lg2mean | MAF           | 12 | 0.23728            | 0.24189    | 0.01079         | 0.22708              | -0.398794             | 0.708631 | 0.4680               |

**Correlation  $C_{pooltop2lg2mean\_tp2}$  symbol MAF****The CORR Procedure**

Gene\_Symbol=NEO1

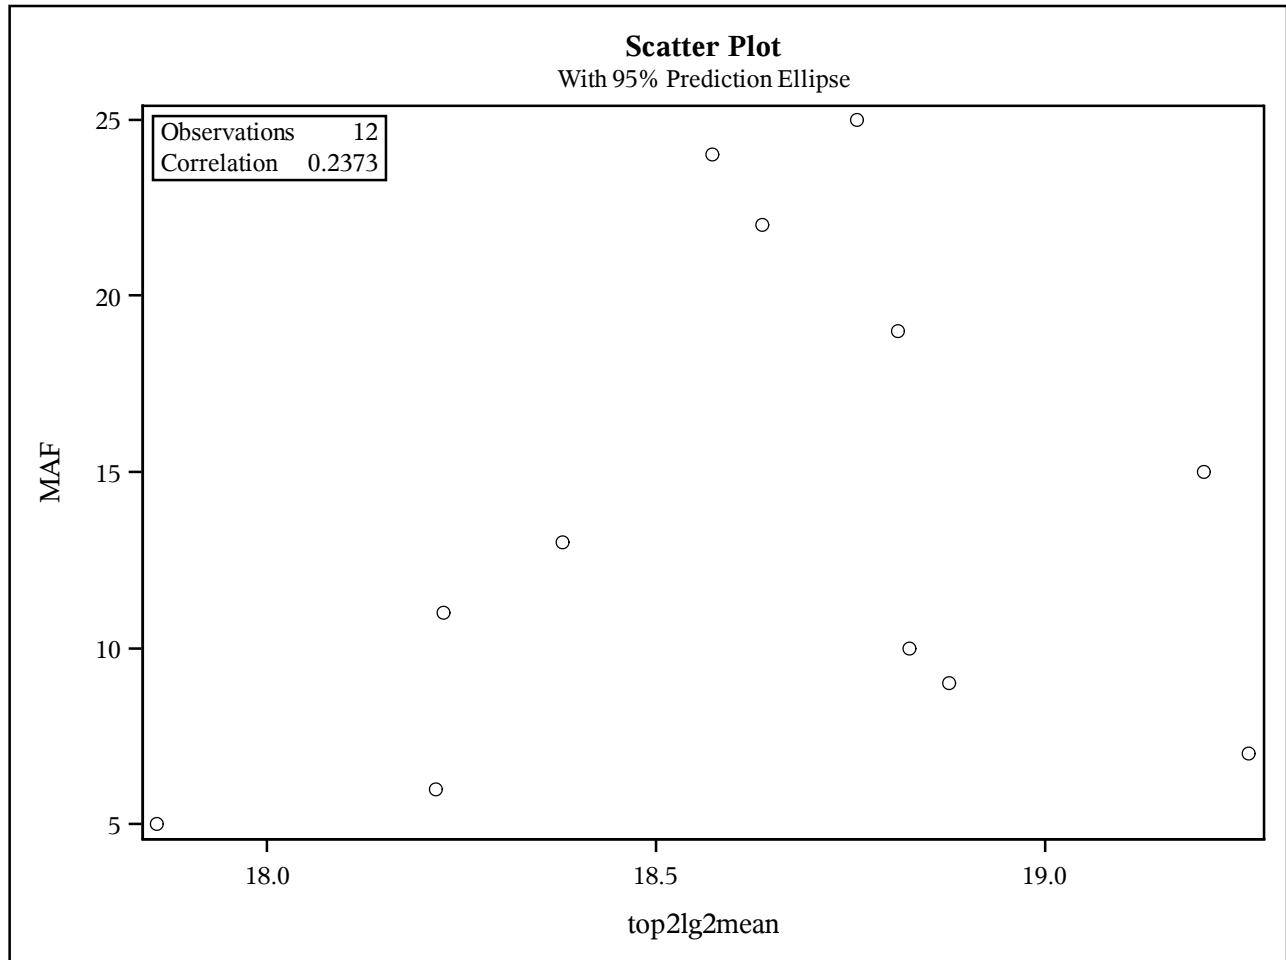

**Correlation C\_pooltop2lg2mean\_tp2 symbol MAF****The CORR Procedure**

Gene\_Symbol=NPC2

2 Variables: top2lg2mean MAF

| Simple Statistics |    |          |         |           |          |          |
|-------------------|----|----------|---------|-----------|----------|----------|
| Variable          | N  | Mean     | Std Dev | Sum       | Minimum  | Maximum  |
| top2lg2mean       | 12 | 19.67006 | 0.50896 | 236.04070 | 18.82205 | 20.78194 |
| MAF               | 12 | 13.83333 | 7.10740 | 166.00000 | 5.00000  | 25.00000 |

| Pearson Correlation Coefficients, N = 12<br>Prob >  r  under H0: Rho=0 |                   |                   |
|------------------------------------------------------------------------|-------------------|-------------------|
|                                                                        | top2lg2mean       | MAF               |
| top2lg2mean                                                            | 1.00000           | 0.08982<br>0.7813 |
| MAF                                                                    | 0.08982<br>0.7813 | 1.00000           |

**Pearson Correlation Statistics (Fisher's z Transformation)**

| Variable    | With Variable | N  | Sample Correlation | Fisher's z | Bias Adjustment | Correlation Estimate | 95% Confidence Limits |          | p Value for H0:Rho=0 |
|-------------|---------------|----|--------------------|------------|-----------------|----------------------|-----------------------|----------|----------------------|
| top2lg2mean | MAF           | 12 | 0.08982            | 0.09006    | 0.00408         | 0.08577              | -0.513405             | 0.628722 | 0.7870               |

**Correlation  $C_{pooltop2lg2mean\_tp2}$  symbol MAF****The CORR Procedure**

Gene\_Symbol=NPC2

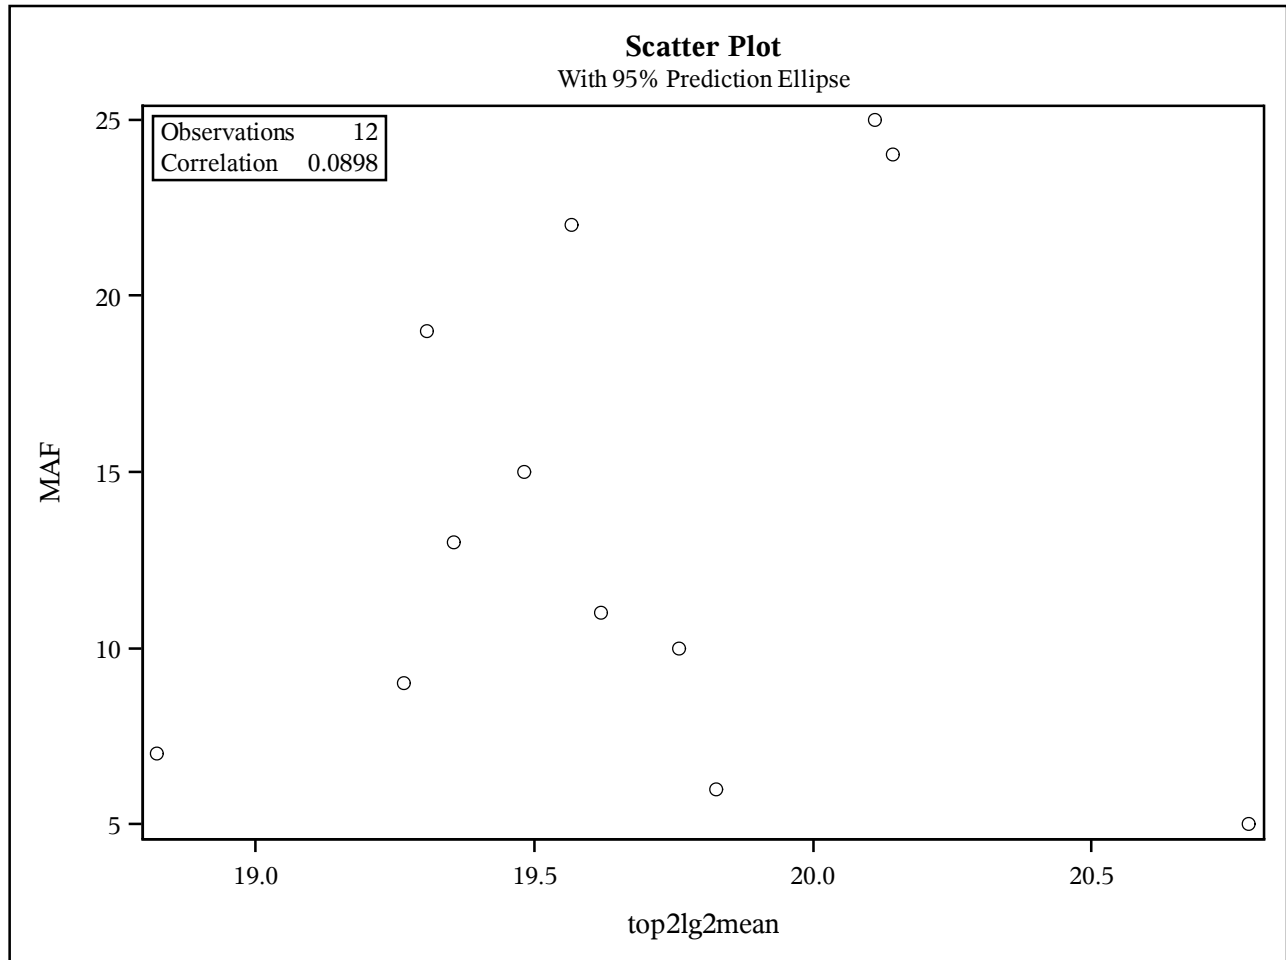

**Correlation C\_pooltop2lg2mean\_tp2 symbol MAF****The CORR Procedure**

Gene\_Symbol=NRCAM

2 Variables: top2lg2mean MAF

| Simple Statistics |    |          |         |           |          |          |
|-------------------|----|----------|---------|-----------|----------|----------|
| Variable          | N  | Mean     | Std Dev | Sum       | Minimum  | Maximum  |
| top2lg2mean       | 12 | 20.82374 | 0.27138 | 249.88485 | 20.37181 | 21.20853 |
| MAF               | 12 | 13.83333 | 7.10740 | 166.00000 | 5.00000  | 25.00000 |

| Pearson Correlation Coefficients, N = 12<br>Prob >  r  under H0: Rho=0 |                   |                   |
|------------------------------------------------------------------------|-------------------|-------------------|
|                                                                        | top2lg2mean       | MAF               |
| top2lg2mean                                                            | 1.00000           | 0.38890<br>0.2115 |
| MAF                                                                    | 0.38890<br>0.2115 | 1.00000           |

**Pearson Correlation Statistics (Fisher's z Transformation)**

| Variable    | With Variable | N  | Sample Correlation | Fisher's z | Bias Adjustment | Correlation Estimate | 95% Confidence Limits |          | p Value for H0:Rho=0 |
|-------------|---------------|----|--------------------|------------|-----------------|----------------------|-----------------------|----------|----------------------|
| top2lg2mean | MAF           | 12 | 0.38890            | 0.41051    | 0.01768         | 0.37380              | -0.254756             | 0.780305 | 0.2181               |

**Correlation C\_pooltop2lg2mean\_tp2 symbol MAF****The CORR Procedure**

Gene\_Symbol=NRCAM

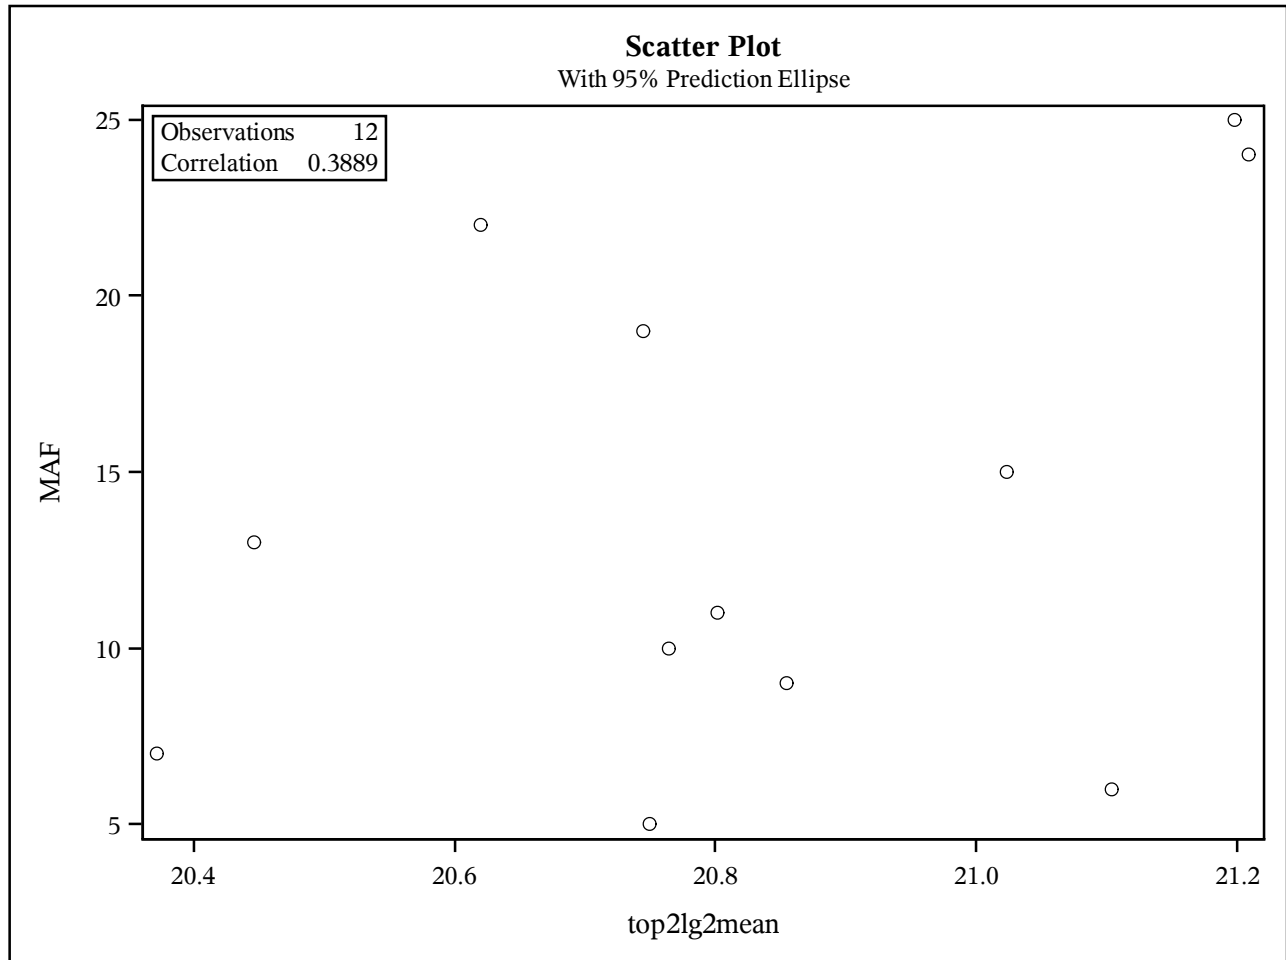

**Correlation C\_pooltop2lg2mean\_tp2 symbol MAF****The CORR Procedure**

Gene\_Symbol=NTM

2 Variables: top2lg2mean MAF

| Simple Statistics |    |          |         |           |          |          |
|-------------------|----|----------|---------|-----------|----------|----------|
| Variable          | N  | Mean     | Std Dev | Sum       | Minimum  | Maximum  |
| top2lg2mean       | 12 | 19.04428 | 0.32215 | 228.53139 | 18.56987 | 19.55018 |
| MAF               | 12 | 13.83333 | 7.10740 | 166.00000 | 5.00000  | 25.00000 |

| Pearson Correlation Coefficients, N = 12<br>Prob >  r  under H0: Rho=0 |                   |                   |
|------------------------------------------------------------------------|-------------------|-------------------|
|                                                                        | top2lg2mean       | MAF               |
| top2lg2mean                                                            | 1.00000           | 0.17001<br>0.5973 |
| MAF                                                                    | 0.17001<br>0.5973 | 1.00000           |

**Pearson Correlation Statistics (Fisher's z Transformation)**

| Variable    | With Variable | N  | Sample Correlation | Fisher's z | Bias Adjustment | Correlation Estimate | 95% Confidence Limits |          | p Value for H0:Rho=0 |
|-------------|---------------|----|--------------------|------------|-----------------|----------------------|-----------------------|----------|----------------------|
| top2lg2mean | MAF           | 12 | 0.17001            | 0.17168    | 0.00773         | 0.16250              | -0.453716             | 0.673583 | 0.6065               |

**Correlation  $C_{pooltop2lg2mean\_tp2}$  symbol MAF****The CORR Procedure**

Gene\_Symbol=NTM

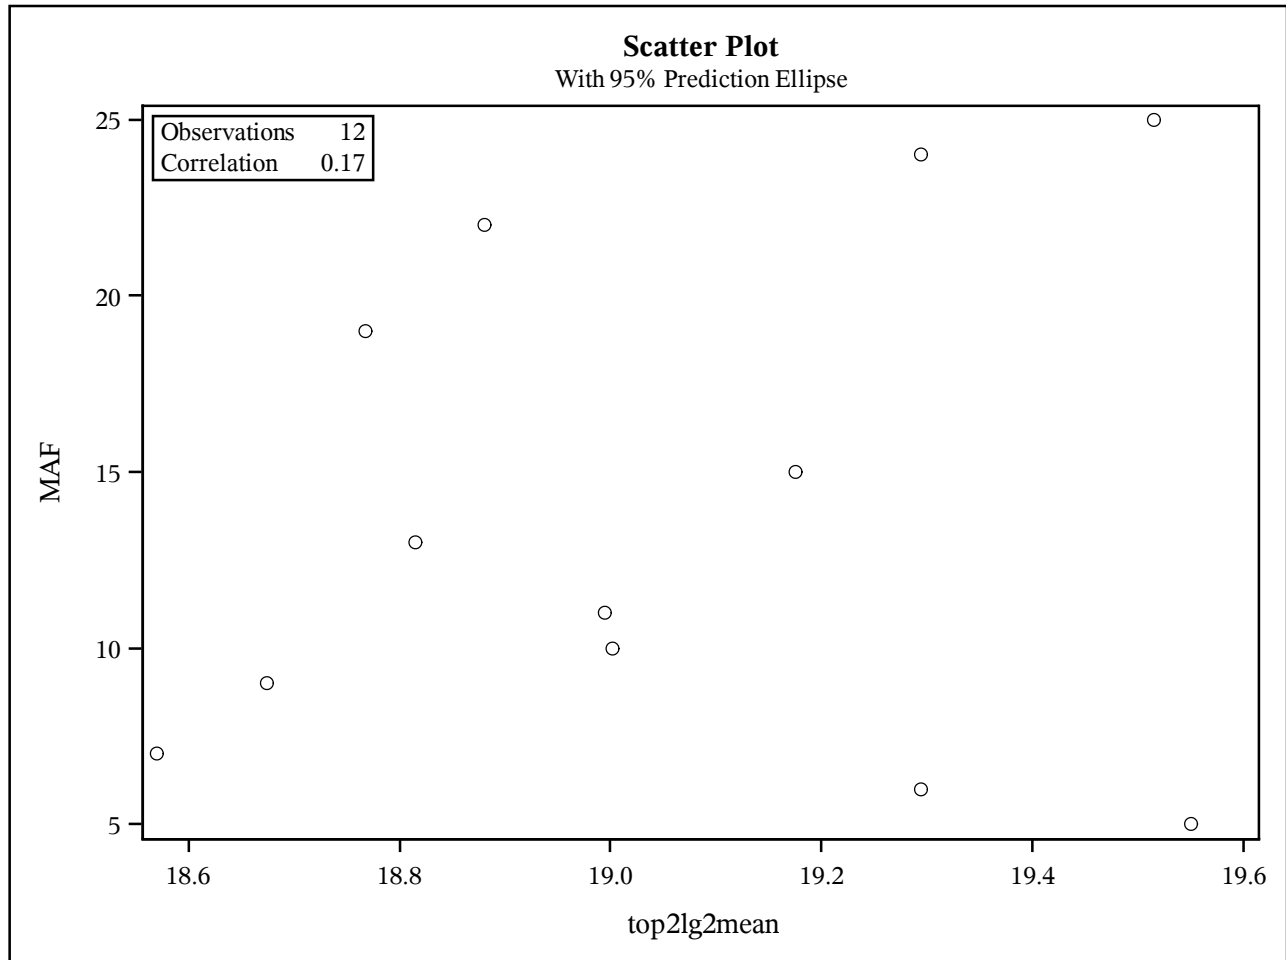



**Correlation C\_pooltop2lg2mean\_tp2 symbol MAF****The CORR Procedure**

Gene\_Symbol=OGN

2 Variables: top2lg2mean MAF

| Simple Statistics |    |          |         |           |          |          |
|-------------------|----|----------|---------|-----------|----------|----------|
| Variable          | N  | Mean     | Std Dev | Sum       | Minimum  | Maximum  |
| top2lg2mean       | 12 | 20.80877 | 0.64074 | 249.70526 | 19.75513 | 22.16848 |
| MAF               | 12 | 13.83333 | 7.10740 | 166.00000 | 5.00000  | 25.00000 |

| Pearson Correlation Coefficients, N = 12<br>Prob >  r  under H0: Rho=0 |                    |                    |
|------------------------------------------------------------------------|--------------------|--------------------|
|                                                                        | top2lg2mean        | MAF                |
| top2lg2mean                                                            | 1.00000            | -0.56498<br>0.0556 |
| MAF                                                                    | -0.56498<br>0.0556 | 1.00000            |

**Pearson Correlation Statistics (Fisher's z Transformation)**

| Variable    | With Variable | N  | Sample Correlation | Fisher's z | Bias Adjustment | Correlation Estimate | 95% Confidence Limits |          | p Value for H0:Rho=0 |
|-------------|---------------|----|--------------------|------------|-----------------|----------------------|-----------------------|----------|----------------------|
| top2lg2mean | MAF           | 12 | -0.56498           | -0.64011   | -0.02568        | -0.54724             | -0.853188             | 0.038869 | 0.0548               |

**Correlation C\_pooltop2lg2mean\_tp2 symbol MAF**

**The CORR Procedure**

Gene\_Symbol=OGN

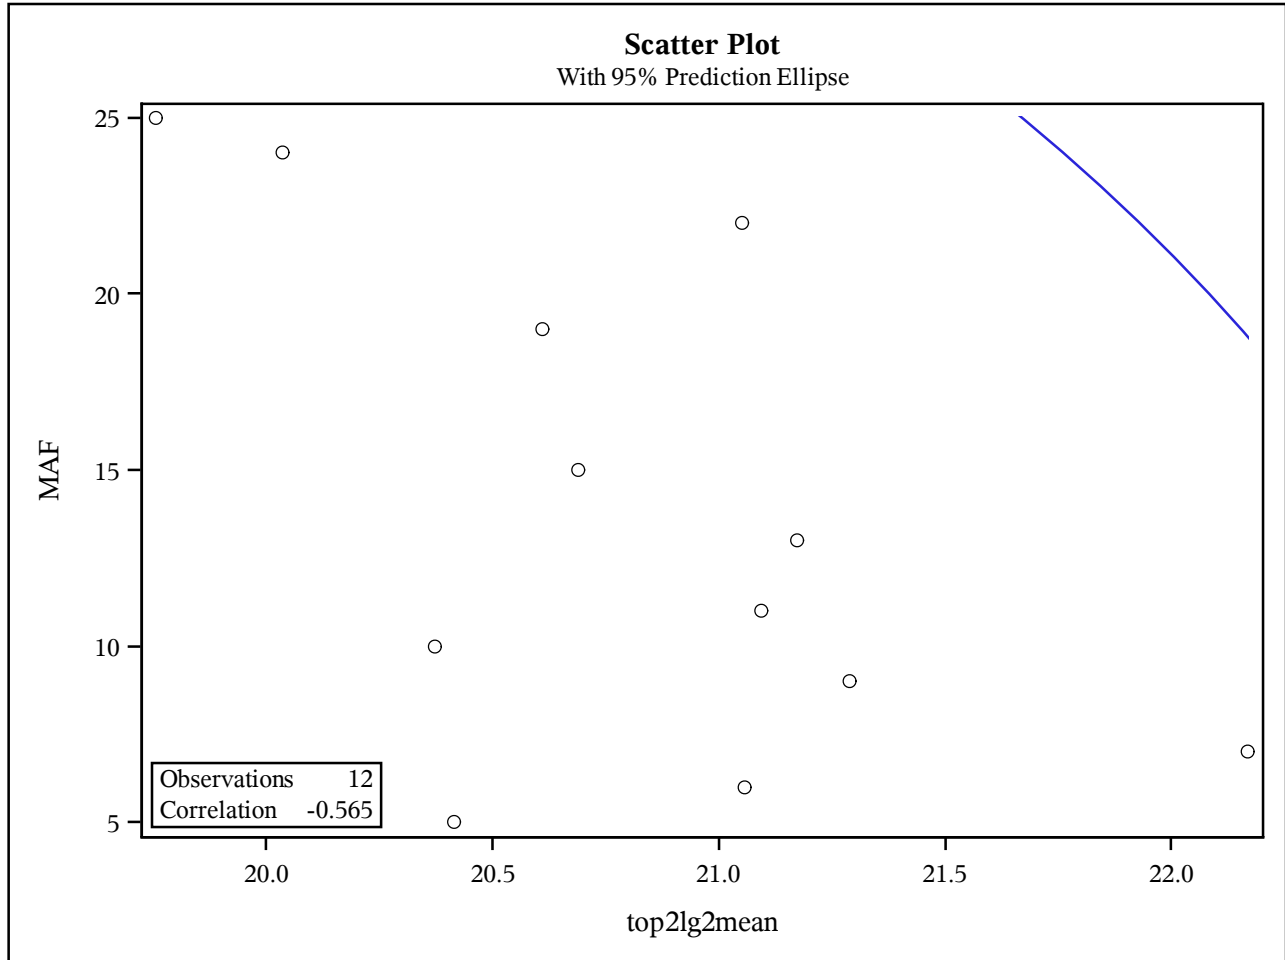

**Correlation C\_pooltop2lg2mean\_tp2 symbol MAF****The CORR Procedure**

Gene\_Symbol=ORM1

2 Variables: top2lg2mean MAF

| Simple Statistics |    |          |         |           |          |          |
|-------------------|----|----------|---------|-----------|----------|----------|
| Variable          | N  | Mean     | Std Dev | Sum       | Minimum  | Maximum  |
| top2lg2mean       | 12 | 25.27837 | 0.18764 | 303.34041 | 24.93241 | 25.59154 |
| MAF               | 12 | 13.83333 | 7.10740 | 166.00000 | 5.00000  | 25.00000 |

| Pearson Correlation Coefficients, N = 12<br>Prob >  r  under H0: Rho=0 |                   |                   |
|------------------------------------------------------------------------|-------------------|-------------------|
|                                                                        | top2lg2mean       | MAF               |
| top2lg2mean                                                            | 1.00000           | 0.54016<br>0.0698 |
| MAF                                                                    | 0.54016<br>0.0698 | 1.00000           |

**Pearson Correlation Statistics (Fisher's z Transformation)**

| Variable    | With Variable | N  | Sample Correlation | Fisher's z | Bias Adjustment | Correlation Estimate | 95% Confidence Limits |          | p Value for H0:Rho=0 |
|-------------|---------------|----|--------------------|------------|-----------------|----------------------|-----------------------|----------|----------------------|
| top2lg2mean | MAF           | 12 | 0.54016            | 0.60438    | 0.02455         | 0.52254              | -0.073361             | 0.843490 | 0.0698               |

**Correlation C\_pooltop2lg2mean\_tp2 symbol MAF**

**The CORR Procedure**

Gene\_Symbol=ORM1

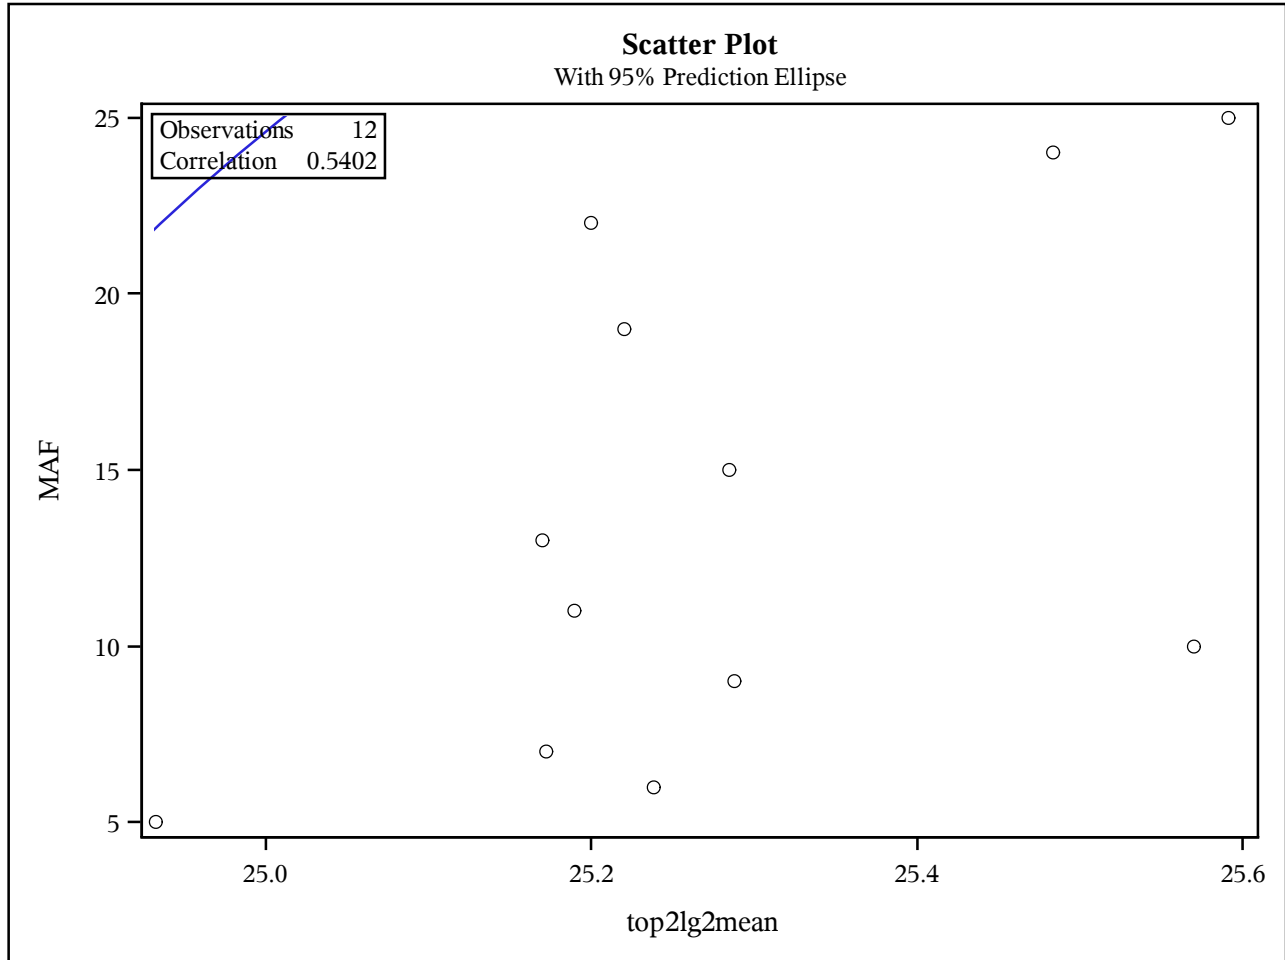

**Correlation C\_pooltop2lg2mean\_tp2 symbol MAF****The CORR Procedure**

Gene\_Symbol=PKM2

2 Variables: top2lg2mean MAF

| Simple Statistics |    |          |         |           |          |          |
|-------------------|----|----------|---------|-----------|----------|----------|
| Variable          | N  | Mean     | Std Dev | Sum       | Minimum  | Maximum  |
| top2lg2mean       | 12 | 16.02777 | 0.55684 | 192.33324 | 15.22430 | 17.32496 |
| MAF               | 12 | 13.83333 | 7.10740 | 166.00000 | 5.00000  | 25.00000 |

| Pearson Correlation Coefficients, N = 12<br>Prob >  r  under H0: Rho=0 |                    |                    |
|------------------------------------------------------------------------|--------------------|--------------------|
|                                                                        | top2lg2mean        | MAF                |
| top2lg2mean                                                            | 1.00000            | -0.30041<br>0.3428 |
| MAF                                                                    | -0.30041<br>0.3428 | 1.00000            |

**Pearson Correlation Statistics (Fisher's z Transformation)**

| Variable    | With Variable | N  | Sample Correlation | Fisher's z | Bias Adjustment | Correlation Estimate | 95% Confidence Limits |          | p Value for H0:Rho=0 |
|-------------|---------------|----|--------------------|------------|-----------------|----------------------|-----------------------|----------|----------------------|
| top2lg2mean | MAF           | 12 | -0.30041           | -0.30997   | -0.01365        | -0.28793             | -0.739616             | 0.342578 | 0.3524               |

**Correlation C\_pooltop2lg2mean\_tp2 symbol MAF**

**The CORR Procedure**

Gene\_Symbol=PKM2

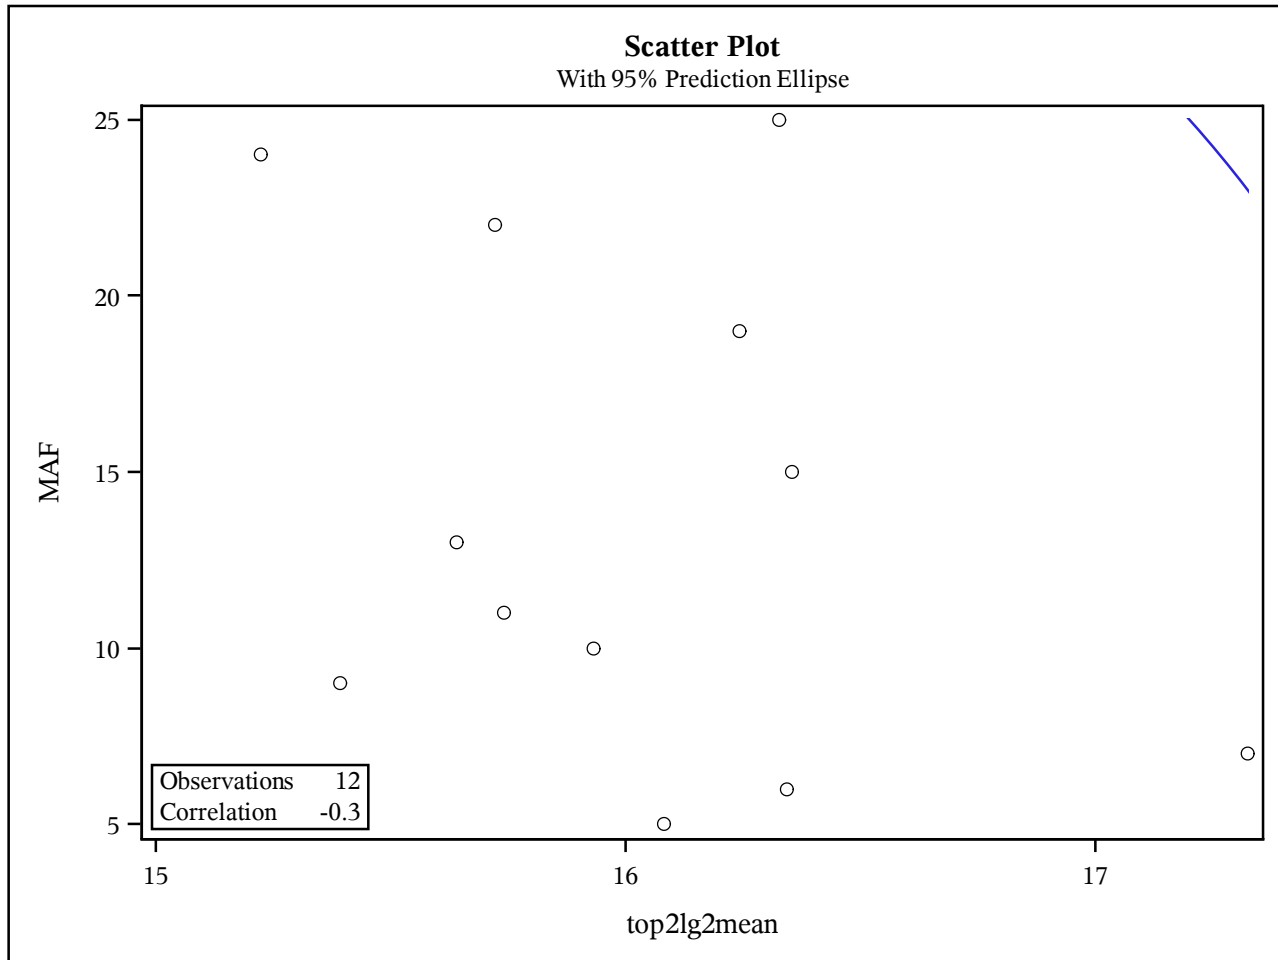

**Correlation C\_pooltop2lg2mean\_tp2 symbol MAF****The CORR Procedure**

Gene\_Symbol=PLG

2 Variables: top2lg2mean MAF

| Simple Statistics |    |          |         |           |          |          |
|-------------------|----|----------|---------|-----------|----------|----------|
| Variable          | N  | Mean     | Std Dev | Sum       | Minimum  | Maximum  |
| top2lg2mean       | 12 | 20.94222 | 0.16342 | 251.30666 | 20.64623 | 21.19274 |
| MAF               | 12 | 13.83333 | 7.10740 | 166.00000 | 5.00000  | 25.00000 |

| Pearson Correlation Coefficients, N = 12<br>Prob >  r  under H0: Rho=0 |                   |                   |
|------------------------------------------------------------------------|-------------------|-------------------|
|                                                                        | top2lg2mean       | MAF               |
| top2lg2mean                                                            | 1.00000           | 0.19839<br>0.5365 |
| MAF                                                                    | 0.19839<br>0.5365 | 1.00000           |

**Pearson Correlation Statistics (Fisher's z Transformation)**

| Variable    | With Variable | N  | Sample Correlation | Fisher's z | Bias Adjustment | Correlation Estimate | 95% Confidence Limits |          | p Value for H0:Rho=0 |
|-------------|---------------|----|--------------------|------------|-----------------|----------------------|-----------------------|----------|----------------------|
| top2lg2mean | MAF           | 12 | 0.19839            | 0.20105    | 0.00902         | 0.18971              | -0.431133             | 0.688635 | 0.5464               |

**Correlation  $C_{pooltop2lg2mean\_tp2}$  symbol MAF**

**The CORR Procedure**

Gene\_Symbol=PLG

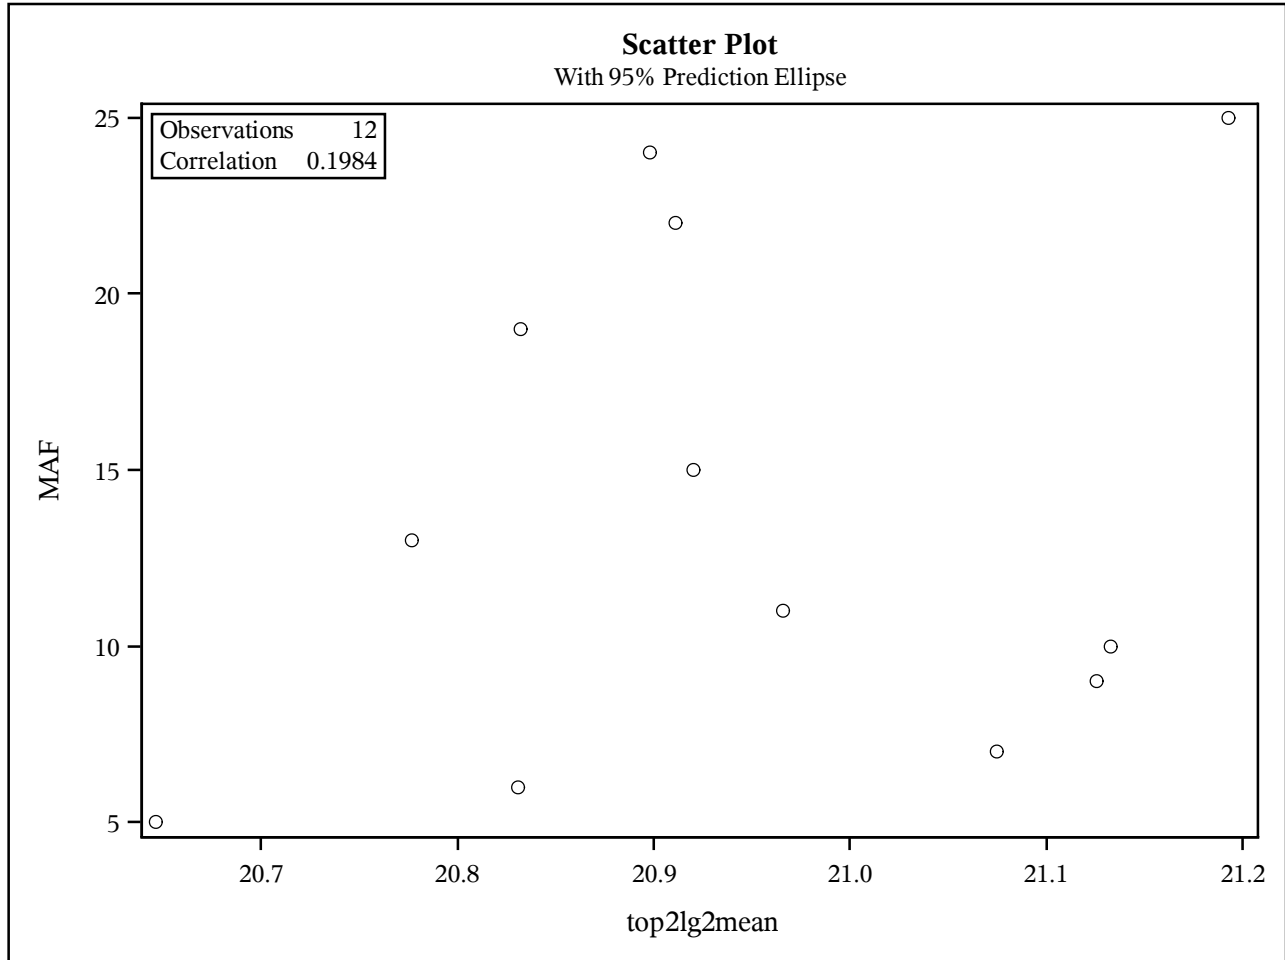



**Correlation C\_pooltop2lg2mean\_tp2 symbol MAF****The CORR Procedure**

Gene\_Symbol=PSAP

2 Variables: top2lg2mean MAF

| Simple Statistics |    |          |         |           |          |          |
|-------------------|----|----------|---------|-----------|----------|----------|
| Variable          | N  | Mean     | Std Dev | Sum       | Minimum  | Maximum  |
| top2lg2mean       | 12 | 17.99037 | 0.31361 | 215.88439 | 17.41062 | 18.37198 |
| MAF               | 12 | 13.83333 | 7.10740 | 166.00000 | 5.00000  | 25.00000 |

| Pearson Correlation Coefficients, N = 12<br>Prob >  r  under H0: Rho=0 |                    |                    |
|------------------------------------------------------------------------|--------------------|--------------------|
|                                                                        | top2lg2mean        | MAF                |
| top2lg2mean                                                            | 1.00000            | -0.35563<br>0.2566 |
| MAF                                                                    | -0.35563<br>0.2566 | 1.00000            |

| Pearson Correlation Statistics (Fisher's z Transformation) |               |    |                    |            |                 |                      |                       |          |                      |
|------------------------------------------------------------|---------------|----|--------------------|------------|-----------------|----------------------|-----------------------|----------|----------------------|
| Variable                                                   | With Variable | N  | Sample Correlation | Fisher's z | Bias Adjustment | Correlation Estimate | 95% Confidence Limits |          | p Value for H0:Rho=0 |
| top2lg2mean                                                | MAF           | 12 | -0.35563           | -0.37187   | -0.01616        | -0.34143             | -0.765360             | 0.289128 | 0.2646               |

**Correlation  $C_{pooltop2lg2mean\_tp2}$  symbol MAF****The CORR Procedure**

Gene\_Symbol=PSAP

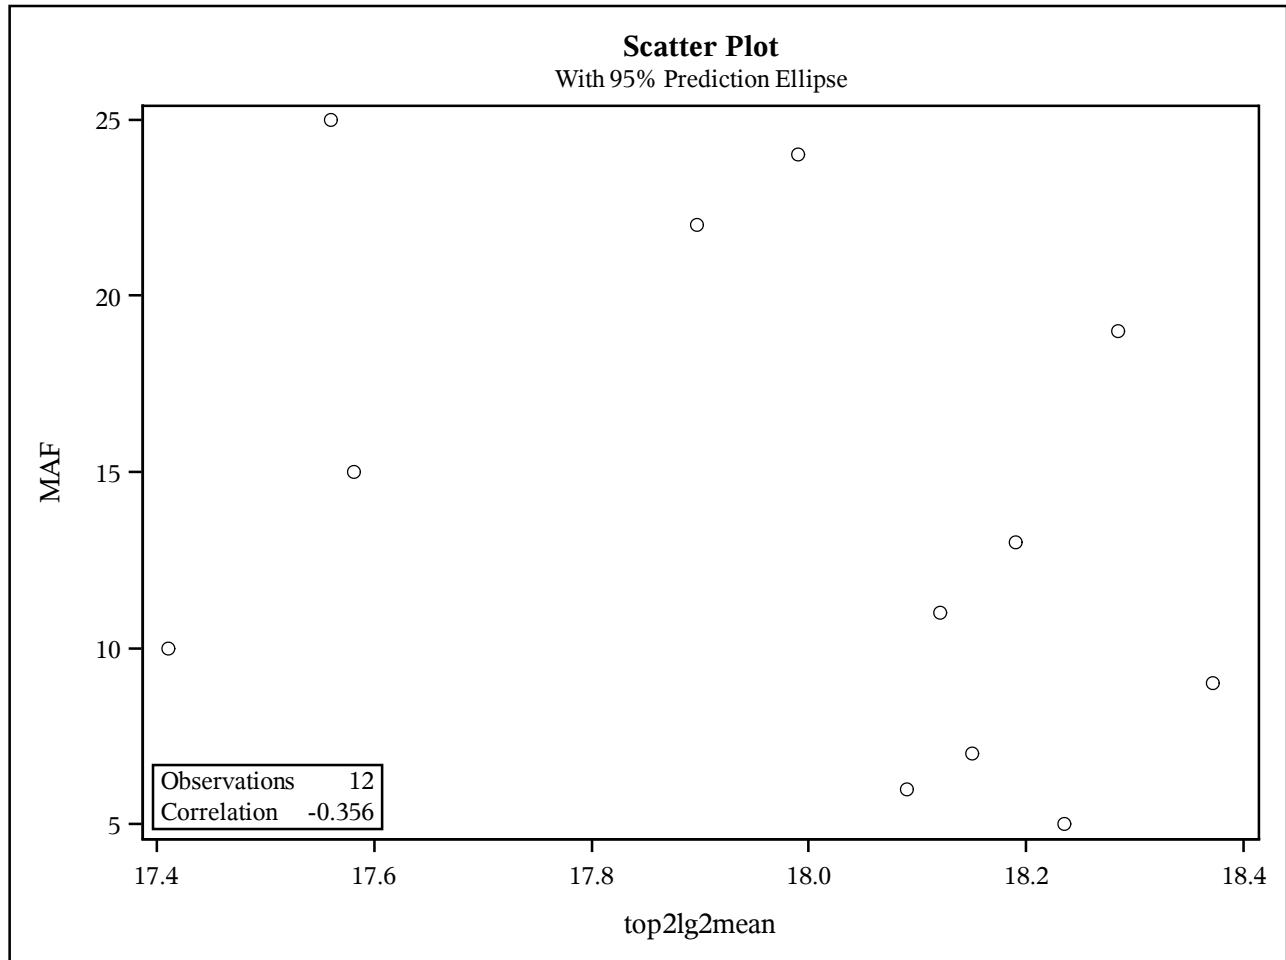

**Correlation C\_pooltop2lg2mean\_tp2 symbol MAF****The CORR Procedure**

Gene\_Symbol=PTGDS

2 Variables: top2lg2mean MAF

| Simple Statistics |    |          |         |           |          |          |
|-------------------|----|----------|---------|-----------|----------|----------|
| Variable          | N  | Mean     | Std Dev | Sum       | Minimum  | Maximum  |
| top2lg2mean       | 12 | 23.74446 | 0.21616 | 284.93356 | 23.35282 | 24.11171 |
| MAF               | 12 | 13.83333 | 7.10740 | 166.00000 | 5.00000  | 25.00000 |

| Pearson Correlation Coefficients, N = 12<br>Prob >  r  under H0: Rho=0 |                   |                   |
|------------------------------------------------------------------------|-------------------|-------------------|
|                                                                        | top2lg2mean       | MAF               |
| top2lg2mean                                                            | 1.00000           | 0.44208<br>0.1502 |
| MAF                                                                    | 0.44208<br>0.1502 | 1.00000           |

**Pearson Correlation Statistics (Fisher's z Transformation)**

| Variable    | With Variable | N  | Sample Correlation | Fisher's z | Bias Adjustment | Correlation Estimate | 95% Confidence Limits |          | p Value for H0:Rho=0 |
|-------------|---------------|----|--------------------|------------|-----------------|----------------------|-----------------------|----------|----------------------|
| top2lg2mean | MAF           | 12 | 0.44208            | 0.47481    | 0.02009         | 0.42577              | -0.196038             | 0.803366 | 0.1543               |

**Correlation  $C_{pooltop2lg2mean\_tp2}$  symbol MAF****The CORR Procedure**

Gene\_Symbol=PTGDS

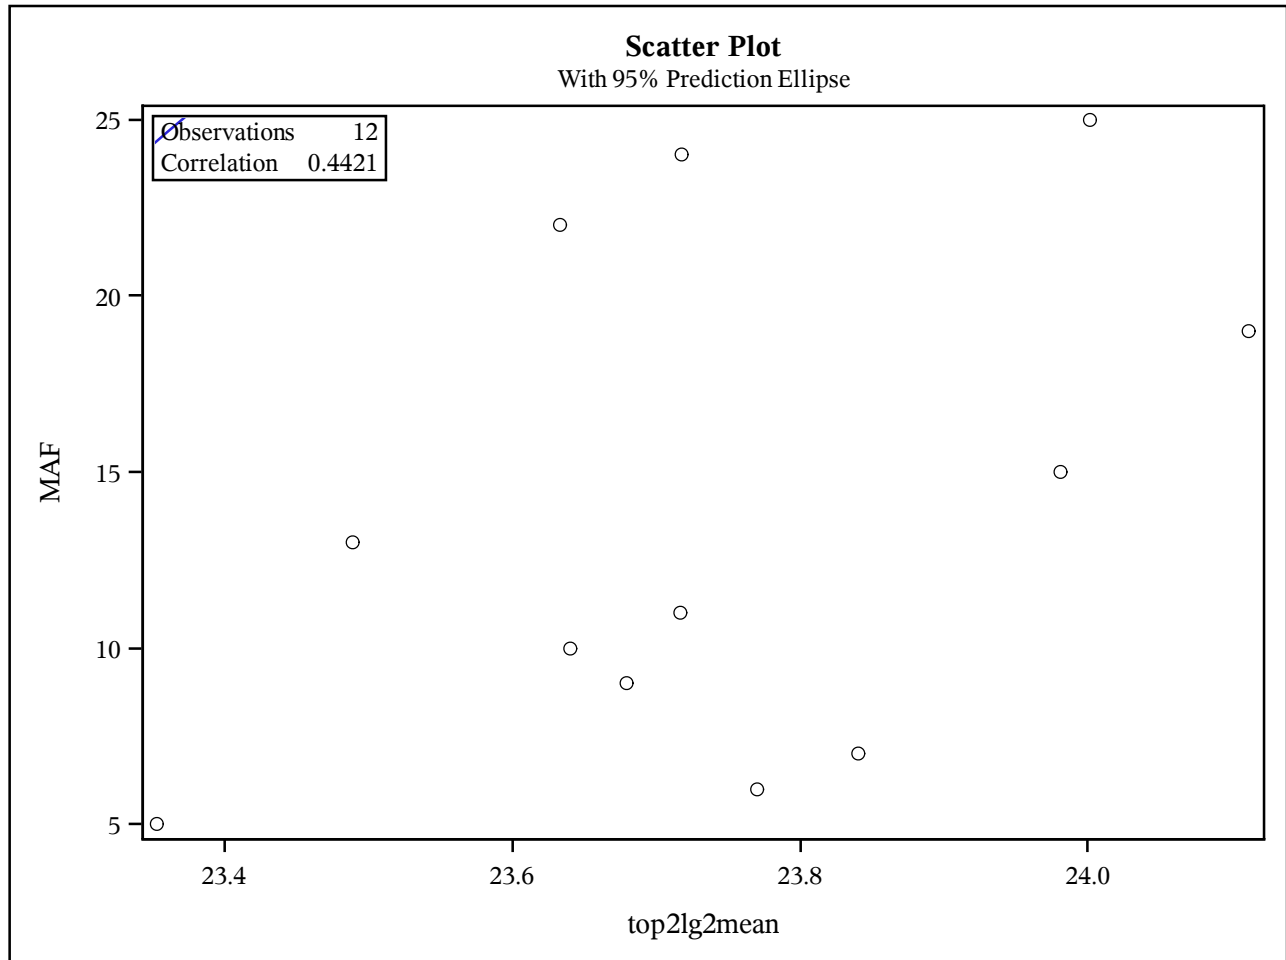

**Correlation C\_pooltop2lg2mean\_tp2 symbol MAF****The CORR Procedure**

Gene\_Symbol=RBP4

2 Variables: top2lg2mean MAF

| Simple Statistics |    |          |         |           |          |          |
|-------------------|----|----------|---------|-----------|----------|----------|
| Variable          | N  | Mean     | Std Dev | Sum       | Minimum  | Maximum  |
| top2lg2mean       | 12 | 20.68553 | 0.17505 | 248.22639 | 20.30637 | 20.87414 |
| MAF               | 12 | 13.83333 | 7.10740 | 166.00000 | 5.00000  | 25.00000 |

| Pearson Correlation Coefficients, N = 12<br>Prob >  r  under H0: Rho=0 |                   |                   |
|------------------------------------------------------------------------|-------------------|-------------------|
|                                                                        | top2lg2mean       | MAF               |
| top2lg2mean                                                            | 1.00000           | 0.13563<br>0.6743 |
| MAF                                                                    | 0.13563<br>0.6743 | 1.00000           |

**Pearson Correlation Statistics (Fisher's z Transformation)**

| Variable    | With Variable | N  | Sample Correlation | Fisher's z | Bias Adjustment | Correlation Estimate | 95% Confidence Limits |          | p Value for H0:Rho=0 |
|-------------|---------------|----|--------------------|------------|-----------------|----------------------|-----------------------|----------|----------------------|
| top2lg2mean | MAF           | 12 | 0.13563            | 0.13647    | 0.00617         | 0.12958              | -0.480023             | 0.654785 | 0.6822               |

**Correlation  $C_{pooltop2lg2mean\_tp2}$  symbol MAF****The CORR Procedure**

Gene\_Symbol=RBP4

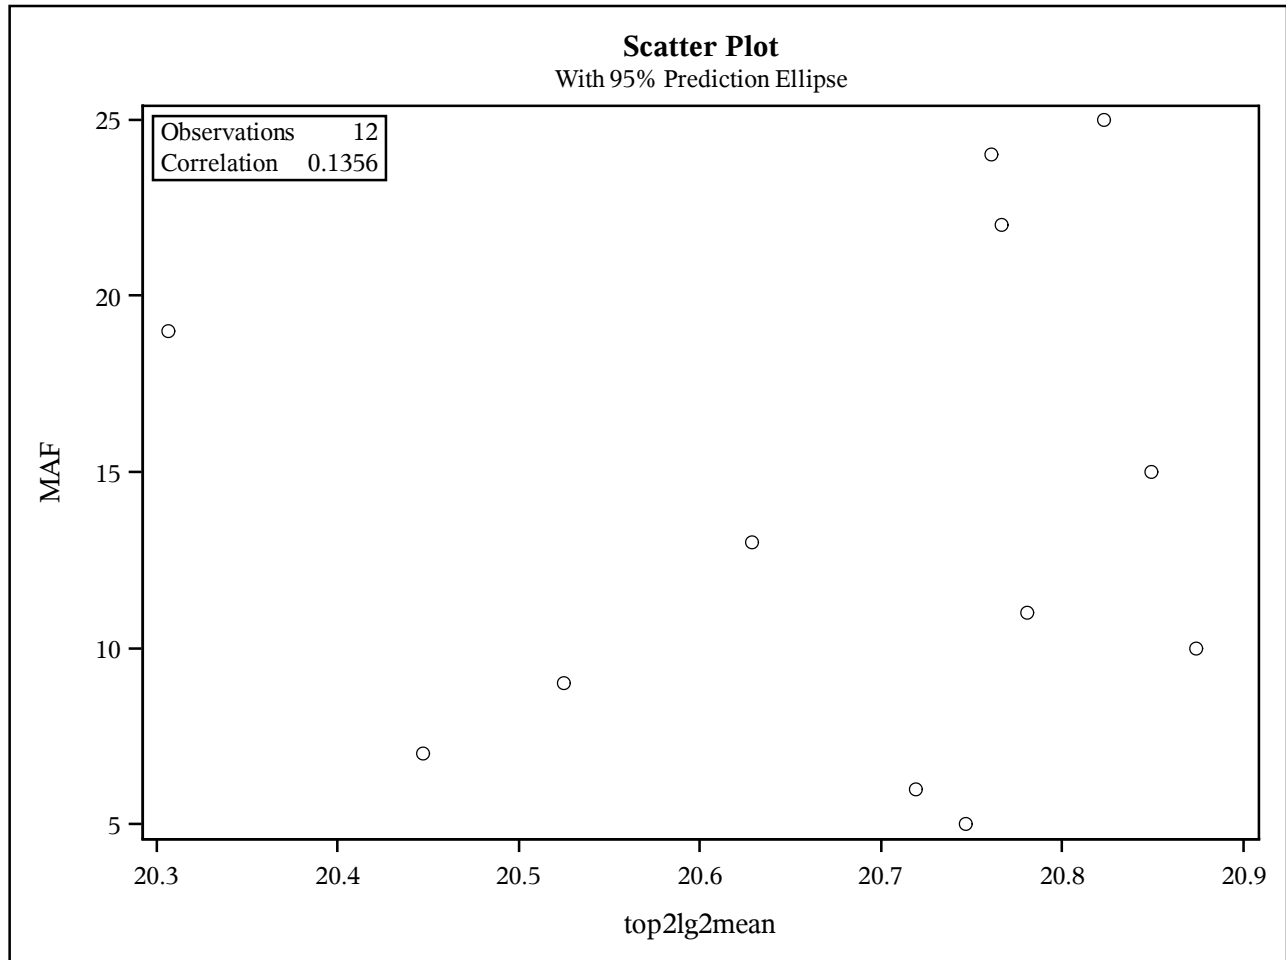

**Correlation C\_pooltop2lg2mean\_tp2 symbol MAF****The CORR Procedure**

Gene\_Symbol=RNASE1

2 Variables: top2lg2mean MAF

| Simple Statistics |    |          |         |           |          |          |
|-------------------|----|----------|---------|-----------|----------|----------|
| Variable          | N  | Mean     | Std Dev | Sum       | Minimum  | Maximum  |
| top2lg2mean       | 12 | 22.32073 | 0.75803 | 267.84872 | 21.06036 | 23.40056 |
| MAF               | 12 | 13.83333 | 7.10740 | 166.00000 | 5.00000  | 25.00000 |

| Pearson Correlation Coefficients, N = 12<br>Prob >  r  under H0: Rho=0 |                    |                    |
|------------------------------------------------------------------------|--------------------|--------------------|
|                                                                        | top2lg2mean        | MAF                |
| top2lg2mean                                                            | 1.00000            | -0.52065<br>0.0826 |
| MAF                                                                    | -0.52065<br>0.0826 | 1.00000            |

| Pearson Correlation Statistics (Fisher's z Transformation) |               |    |                    |            |                 |                      |                       |          |                      |
|------------------------------------------------------------|---------------|----|--------------------|------------|-----------------|----------------------|-----------------------|----------|----------------------|
| Variable                                                   | With Variable | N  | Sample Correlation | Fisher's z | Bias Adjustment | Correlation Estimate | 95% Confidence Limits |          | p Value for H0:Rho=0 |
| top2lg2mean                                                | MAF           | 12 | -0.52065           | -0.57724   | -0.02367        | -0.50319             | -0.835745             | 0.099421 | 0.0833               |

**Correlation C\_pooltop2lg2mean\_tp2 symbol MAF****The CORR Procedure**

Gene\_Symbol=RNASE1

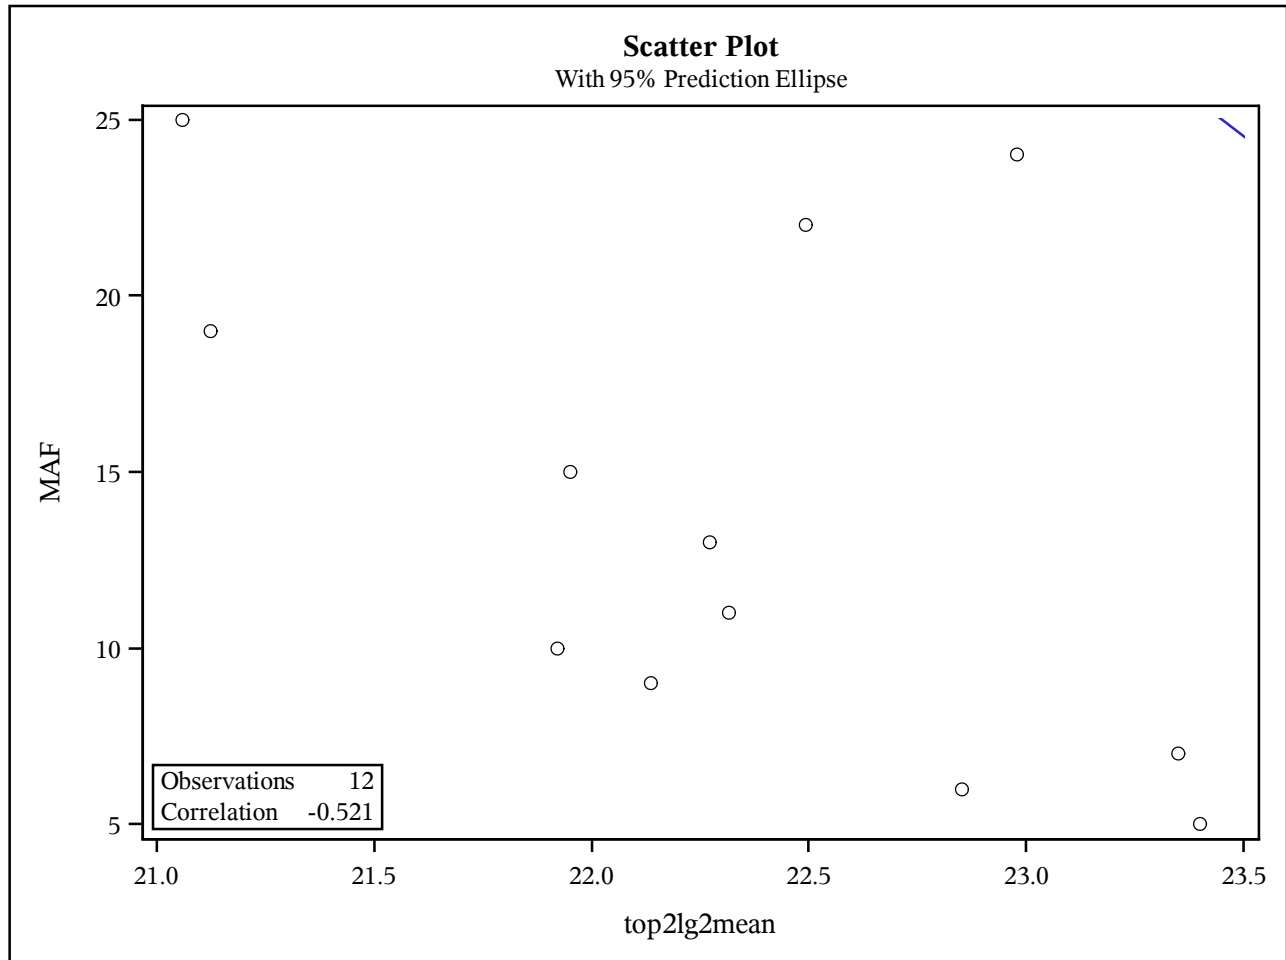



**Correlation C\_pooltop2lg2mean\_tp2 symbol MAF****The CORR Procedure**

Gene\_Symbol=SCG3

2 Variables: top2lg2mean MAF

| Simple Statistics |    |          |         |           |          |          |
|-------------------|----|----------|---------|-----------|----------|----------|
| Variable          | N  | Mean     | Std Dev | Sum       | Minimum  | Maximum  |
| top2lg2mean       | 12 | 20.88501 | 0.26995 | 250.62014 | 20.48278 | 21.33450 |
| MAF               | 12 | 13.83333 | 7.10740 | 166.00000 | 5.00000  | 25.00000 |

| Pearson Correlation Coefficients, N = 12<br>Prob >  r  under H0: Rho=0 |                   |                   |
|------------------------------------------------------------------------|-------------------|-------------------|
|                                                                        | top2lg2mean       | MAF               |
| top2lg2mean                                                            | 1.00000           | 0.19128<br>0.5515 |
| MAF                                                                    | 0.19128<br>0.5515 | 1.00000           |

| Pearson Correlation Statistics (Fisher's z Transformation) |               |    |                    |            |                 |                      |                       |          |                      |
|------------------------------------------------------------|---------------|----|--------------------|------------|-----------------|----------------------|-----------------------|----------|----------------------|
| Variable                                                   | With Variable | N  | Sample Correlation | Fisher's z | Bias Adjustment | Correlation Estimate | 95% Confidence Limits |          | p Value for H0:Rho=0 |
| top2lg2mean                                                | MAF           | 12 | 0.19128            | 0.19367    | 0.00869         | 0.18289              | -0.436865             | 0.684904 | 0.5612               |

**Correlation C\_pooltop2lg2mean\_tp2 symbol MAF****The CORR Procedure**

Gene\_Symbol=SCG3

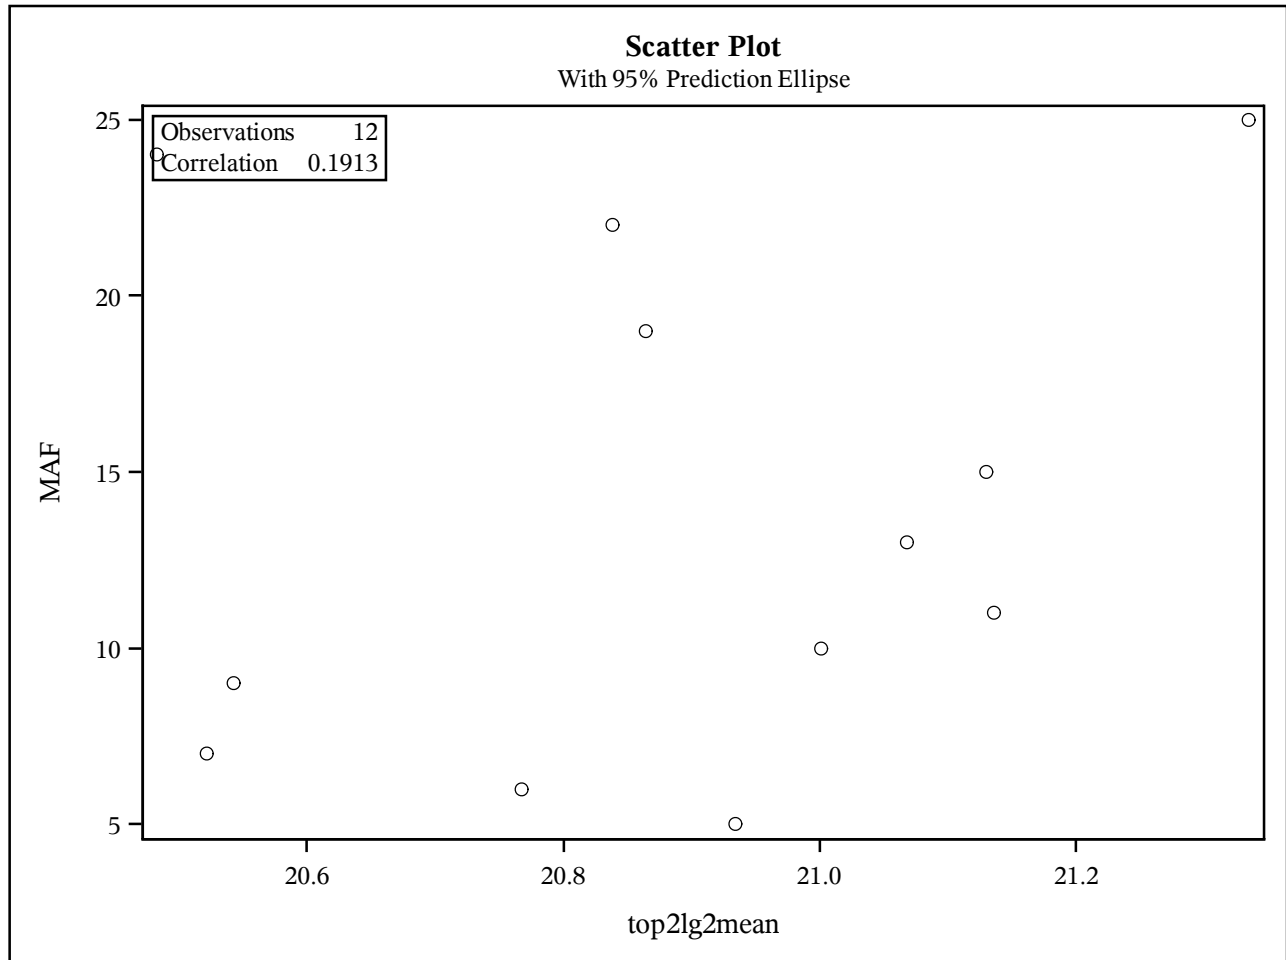

**Correlation C\_pooltop2lg2mean\_tp2 symbol MAF****The CORR Procedure**

Gene\_Symbol=SERPINA3

2 Variables: top2lg2mean MAF

| Simple Statistics |    |          |         |           |          |          |
|-------------------|----|----------|---------|-----------|----------|----------|
| Variable          | N  | Mean     | Std Dev | Sum       | Minimum  | Maximum  |
| top2lg2mean       | 12 | 22.62516 | 0.32380 | 271.50187 | 22.10855 | 23.09064 |
| MAF               | 12 | 13.83333 | 7.10740 | 166.00000 | 5.00000  | 25.00000 |

| Pearson Correlation Coefficients, N = 12<br>Prob >  r  under H0: Rho=0 |                   |                   |
|------------------------------------------------------------------------|-------------------|-------------------|
|                                                                        | top2lg2mean       | MAF               |
| top2lg2mean                                                            | 1.00000           | 0.00748<br>0.9816 |
| MAF                                                                    | 0.00748<br>0.9816 | 1.00000           |

| Pearson Correlation Statistics (Fisher's z Transformation) |               |    |                    |            |                 |                      |                       |          |                      |
|------------------------------------------------------------|---------------|----|--------------------|------------|-----------------|----------------------|-----------------------|----------|----------------------|
| Variable                                                   | With Variable | N  | Sample Correlation | Fisher's z | Bias Adjustment | Correlation Estimate | 95% Confidence Limits |          | p Value for H0:Rho=0 |
| top2lg2mean                                                | MAF           | 12 | 0.00748            | 0.00748    | 0.0003398       | 0.00714              | -0.569096             | 0.578668 | 0.9821               |

**Correlation C\_pooltop2lg2mean\_tp2 symbol MAF**

**The CORR Procedure**

Gene\_Symbol=SERPINA3

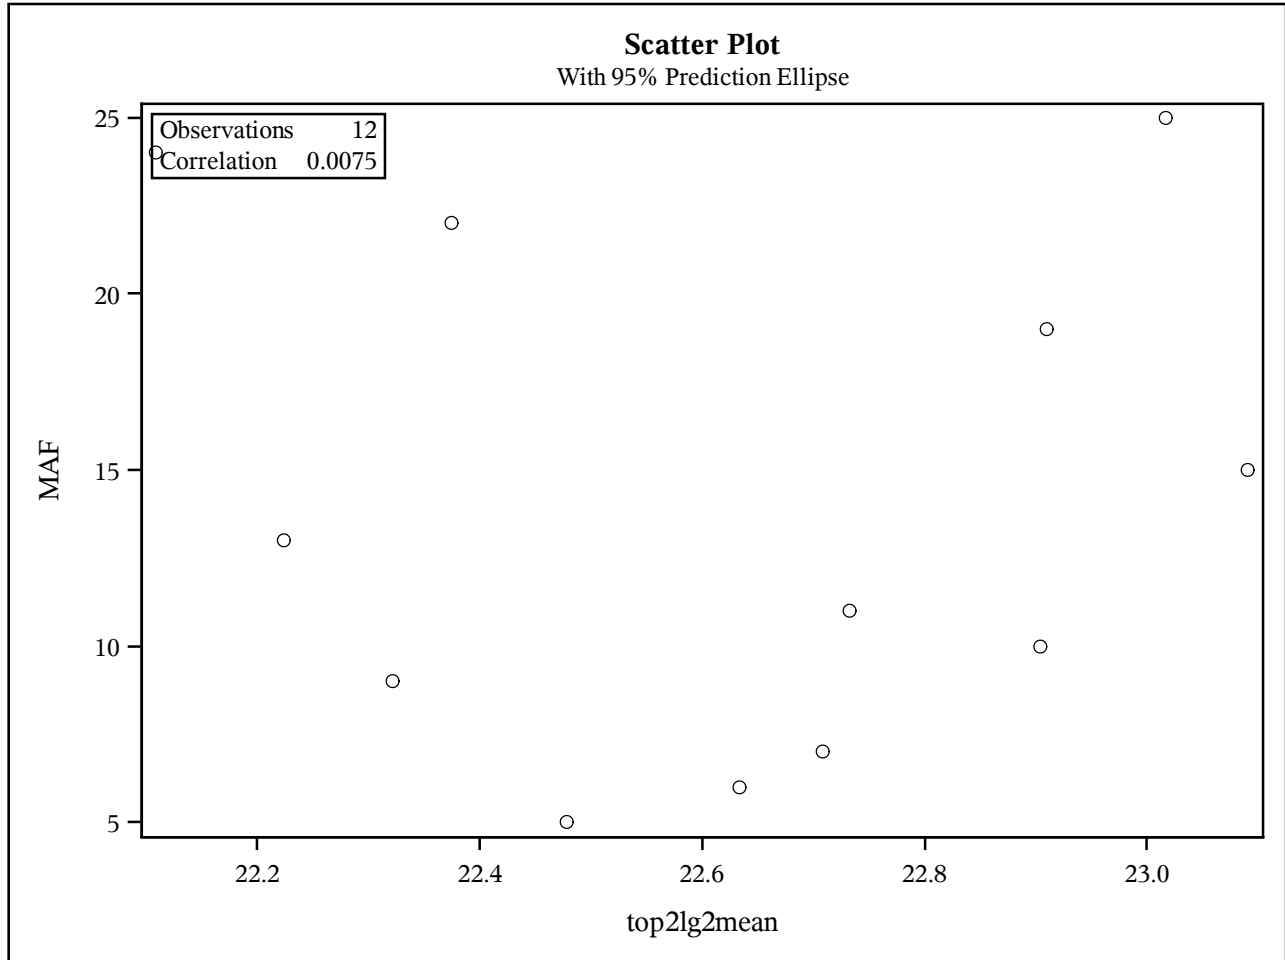

**Correlation C\_pooltop2lg2mean\_tp2 symbol MAF****The CORR Procedure**

Gene\_Symbol=SERPINC1

2 Variables: top2lg2mean MAF

| Simple Statistics |    |          |         |           |          |          |
|-------------------|----|----------|---------|-----------|----------|----------|
| Variable          | N  | Mean     | Std Dev | Sum       | Minimum  | Maximum  |
| top2lg2mean       | 12 | 21.46794 | 0.16544 | 257.61532 | 21.17691 | 21.68697 |
| MAF               | 12 | 13.83333 | 7.10740 | 166.00000 | 5.00000  | 25.00000 |

| Pearson Correlation Coefficients, N = 12<br>Prob >  r  under H0: Rho=0 |                   |                   |
|------------------------------------------------------------------------|-------------------|-------------------|
|                                                                        | top2lg2mean       | MAF               |
| top2lg2mean                                                            | 1.00000           | 0.27772<br>0.3821 |
| MAF                                                                    | 0.27772<br>0.3821 | 1.00000           |

**Pearson Correlation Statistics (Fisher's z Transformation)**

| Variable    | With Variable | N  | Sample Correlation | Fisher's z | Bias Adjustment | Correlation Estimate | 95% Confidence Limits |          | p Value for H0:Rho=0 |
|-------------|---------------|----|--------------------|------------|-----------------|----------------------|-----------------------|----------|----------------------|
| top2lg2mean | MAF           | 12 | 0.27772            | 0.28521    | 0.01262         | 0.26603              | -0.363349             | 0.728678 | 0.3922               |

**Correlation C\_pooltop2lg2mean\_tp2 symbol MAF****The CORR Procedure**

Gene\_Symbol=SERPINC1

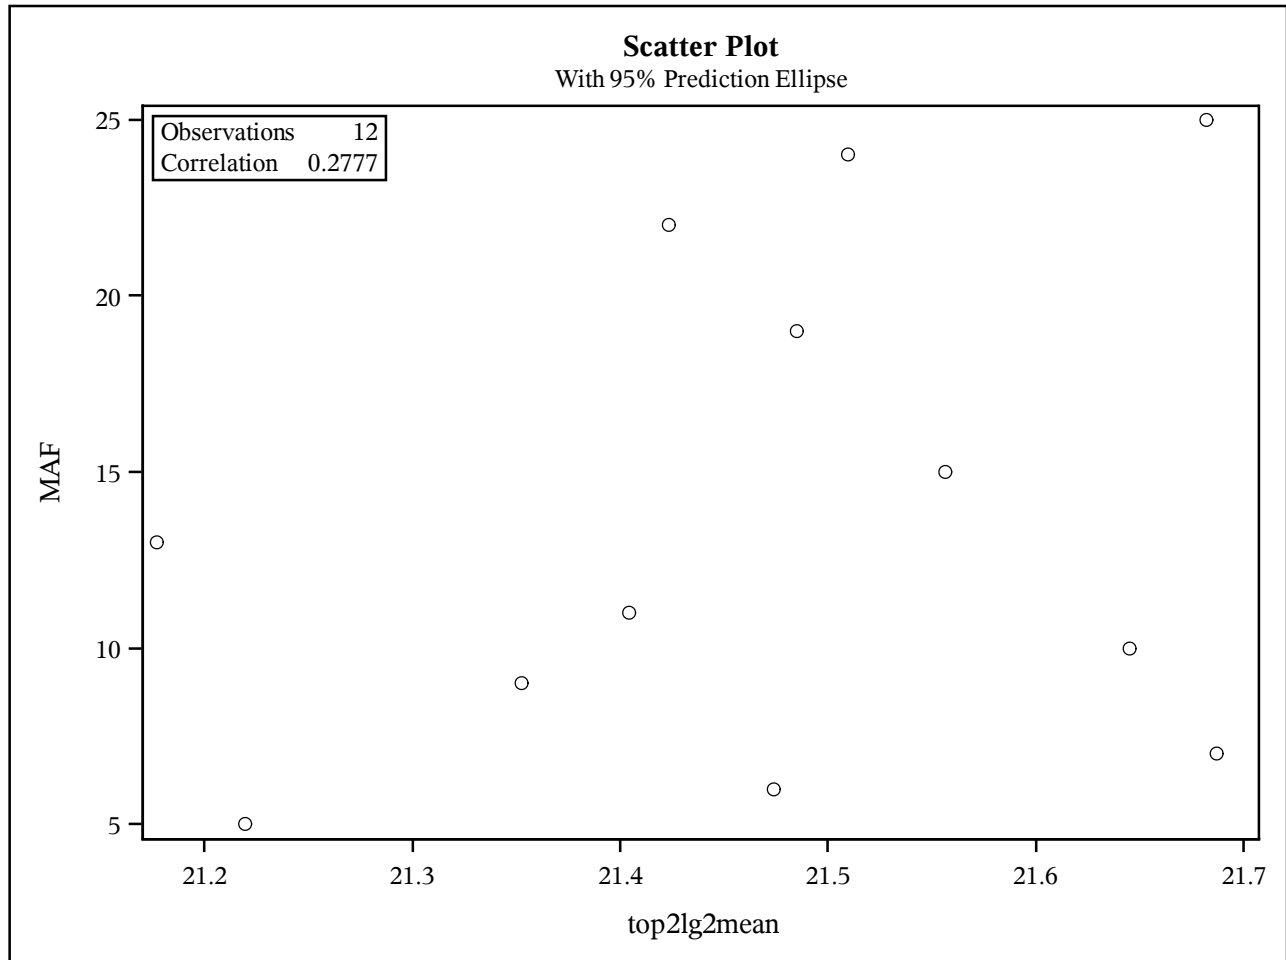

**Correlation C\_pooltop2lg2mean\_tp2 symbol MAF****The CORR Procedure**

Gene\_Symbol=SERPIND1

2 Variables: top2lg2mean MAF

| Simple Statistics |    |          |         |           |          |          |
|-------------------|----|----------|---------|-----------|----------|----------|
| Variable          | N  | Mean     | Std Dev | Sum       | Minimum  | Maximum  |
| top2lg2mean       | 12 | 17.67289 | 0.55318 | 212.07465 | 16.75935 | 18.49608 |
| MAF               | 12 | 13.83333 | 7.10740 | 166.00000 | 5.00000  | 25.00000 |

| Pearson Correlation Coefficients, N = 12<br>Prob >  r  under H0: Rho=0 |                   |                   |
|------------------------------------------------------------------------|-------------------|-------------------|
|                                                                        | top2lg2mean       | MAF               |
| top2lg2mean                                                            | 1.00000           | 0.16599<br>0.6061 |
| MAF                                                                    | 0.16599<br>0.6061 | 1.00000           |

**Pearson Correlation Statistics (Fisher's z Transformation)**

| Variable    | With Variable | N  | Sample Correlation | Fisher's z | Bias Adjustment | Correlation Estimate | 95% Confidence Limits |          | p Value for H0:Rho=0 |
|-------------|---------------|----|--------------------|------------|-----------------|----------------------|-----------------------|----------|----------------------|
| top2lg2mean | MAF           | 12 | 0.16599            | 0.16754    | 0.00755         | 0.15865              | -0.456849             | 0.671418 | 0.6152               |

**Correlation C\_pooltop2lg2mean\_tp2 symbol MAF****The CORR Procedure**

Gene\_Symbol=SERPIND1

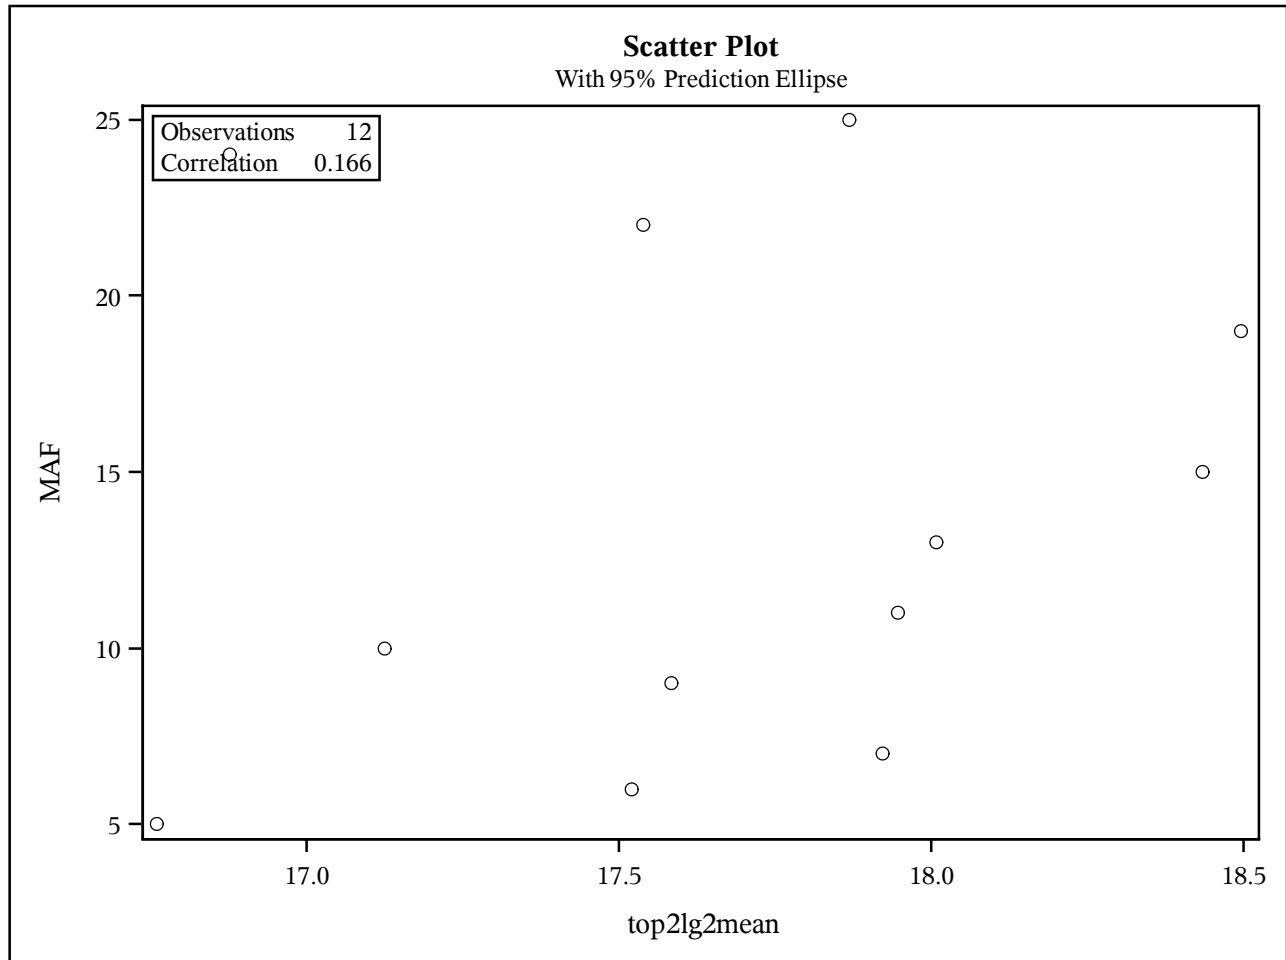



**Correlation C\_pooltop2lg2mean\_tp2 symbol MAF****The CORR Procedure**

Gene\_Symbol=SERPINF1

2 Variables: top2lg2mean MAF

| Simple Statistics |    |          |         |           |          |          |
|-------------------|----|----------|---------|-----------|----------|----------|
| Variable          | N  | Mean     | Std Dev | Sum       | Minimum  | Maximum  |
| top2lg2mean       | 12 | 22.95120 | 0.25443 | 275.41434 | 22.55917 | 23.56111 |
| MAF               | 12 | 13.83333 | 7.10740 | 166.00000 | 5.00000  | 25.00000 |

| Pearson Correlation Coefficients, N = 12<br>Prob >  r  under H0: Rho=0 |                    |                    |
|------------------------------------------------------------------------|--------------------|--------------------|
|                                                                        | top2lg2mean        | MAF                |
| top2lg2mean                                                            | 1.00000            | -0.46203<br>0.1305 |
| MAF                                                                    | -0.46203<br>0.1305 | 1.00000            |

| Pearson Correlation Statistics (Fisher's z Transformation) |               |    |                    |            |                 |                      |                       |          |                      |
|------------------------------------------------------------|---------------|----|--------------------|------------|-----------------|----------------------|-----------------------|----------|----------------------|
| Variable                                                   | With Variable | N  | Sample Correlation | Fisher's z | Bias Adjustment | Correlation Estimate | 95% Confidence Limits |          | p Value for H0:Rho=0 |
| top2lg2mean                                                | MAF           | 12 | -0.46203           | -0.49988   | -0.02100        | -0.44535             | -0.811772             | 0.172691 | 0.1337               |

**Correlation  $C_{pooltop2lg2mean\_tp2}$  symbol MAF****The CORR Procedure**

Gene\_Symbol=SERPINF1

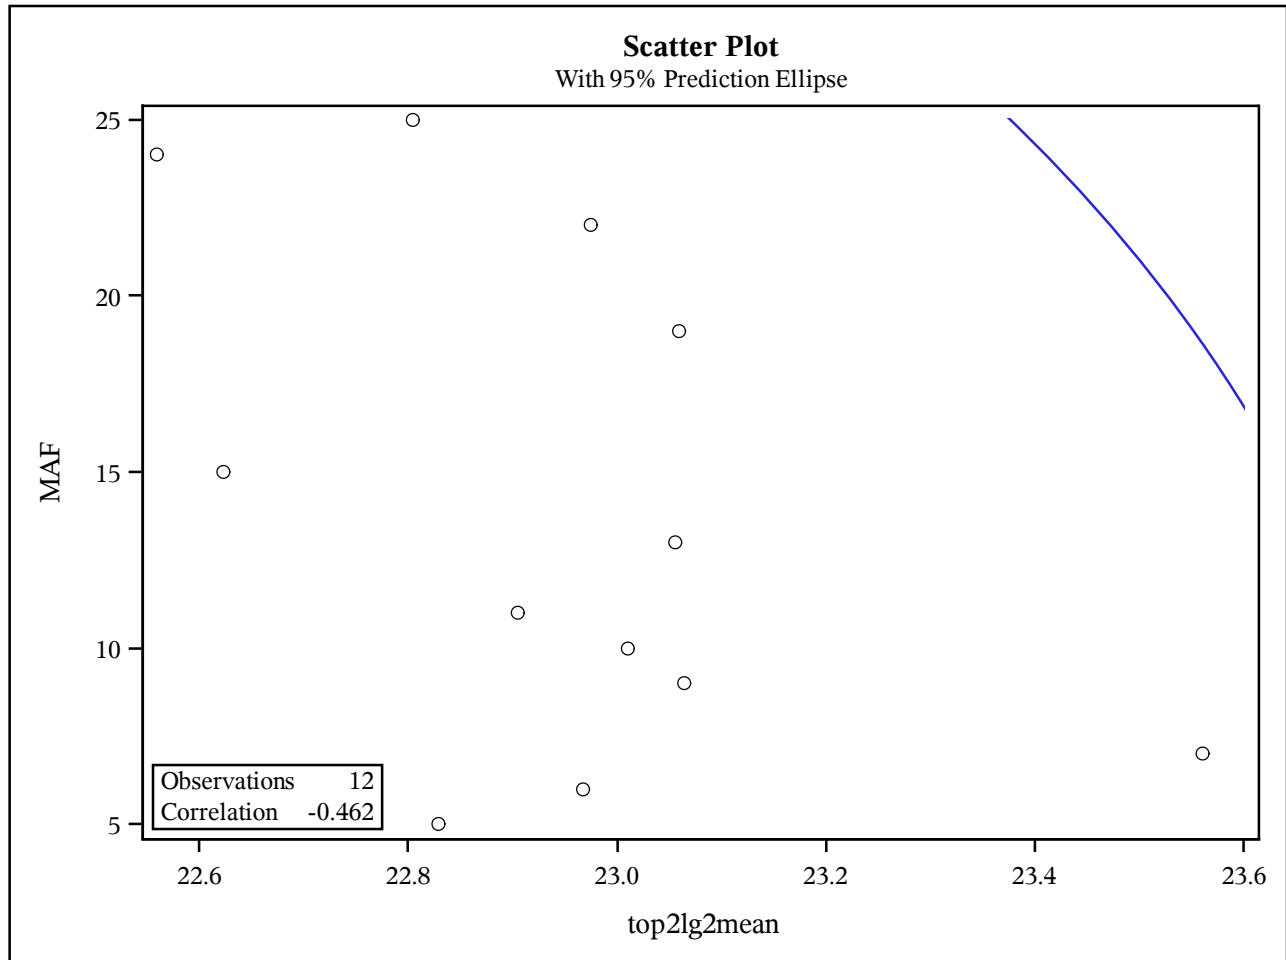

**Correlation C\_pooltop2lg2mean\_tp2 symbol MAF****The CORR Procedure**

Gene\_Symbol=SERPING1

2 Variables: top2lg2mean MAF

| Simple Statistics |    |          |         |           |          |          |
|-------------------|----|----------|---------|-----------|----------|----------|
| Variable          | N  | Mean     | Std Dev | Sum       | Minimum  | Maximum  |
| top2lg2mean       | 12 | 21.81399 | 0.49183 | 261.76791 | 20.79293 | 22.57029 |
| MAF               | 12 | 13.83333 | 7.10740 | 166.00000 | 5.00000  | 25.00000 |

| Pearson Correlation Coefficients, N = 12<br>Prob >  r  under H0: Rho=0 |                    |                    |
|------------------------------------------------------------------------|--------------------|--------------------|
|                                                                        | top2lg2mean        | MAF                |
| top2lg2mean                                                            | 1.00000            | -0.07424<br>0.8186 |
| MAF                                                                    | -0.07424<br>0.8186 | 1.00000            |

| Pearson Correlation Statistics (Fisher's z Transformation) |               |    |                    |            |                 |                      |                       |          |                      |
|------------------------------------------------------------|---------------|----|--------------------|------------|-----------------|----------------------|-----------------------|----------|----------------------|
| Variable                                                   | With Variable | N  | Sample Correlation | Fisher's z | Bias Adjustment | Correlation Estimate | 95% Confidence Limits |          | p Value for H0:Rho=0 |
| top2lg2mean                                                | MAF           | 12 | -0.07424           | -0.07438   | -0.00337        | -0.07088             | -0.619581             | 0.524348 | 0.8234               |

**Correlation  $C_{pooltop2lg2mean\_tp2}$  symbol MAF****The CORR Procedure**

Gene\_Symbol=SERPING1

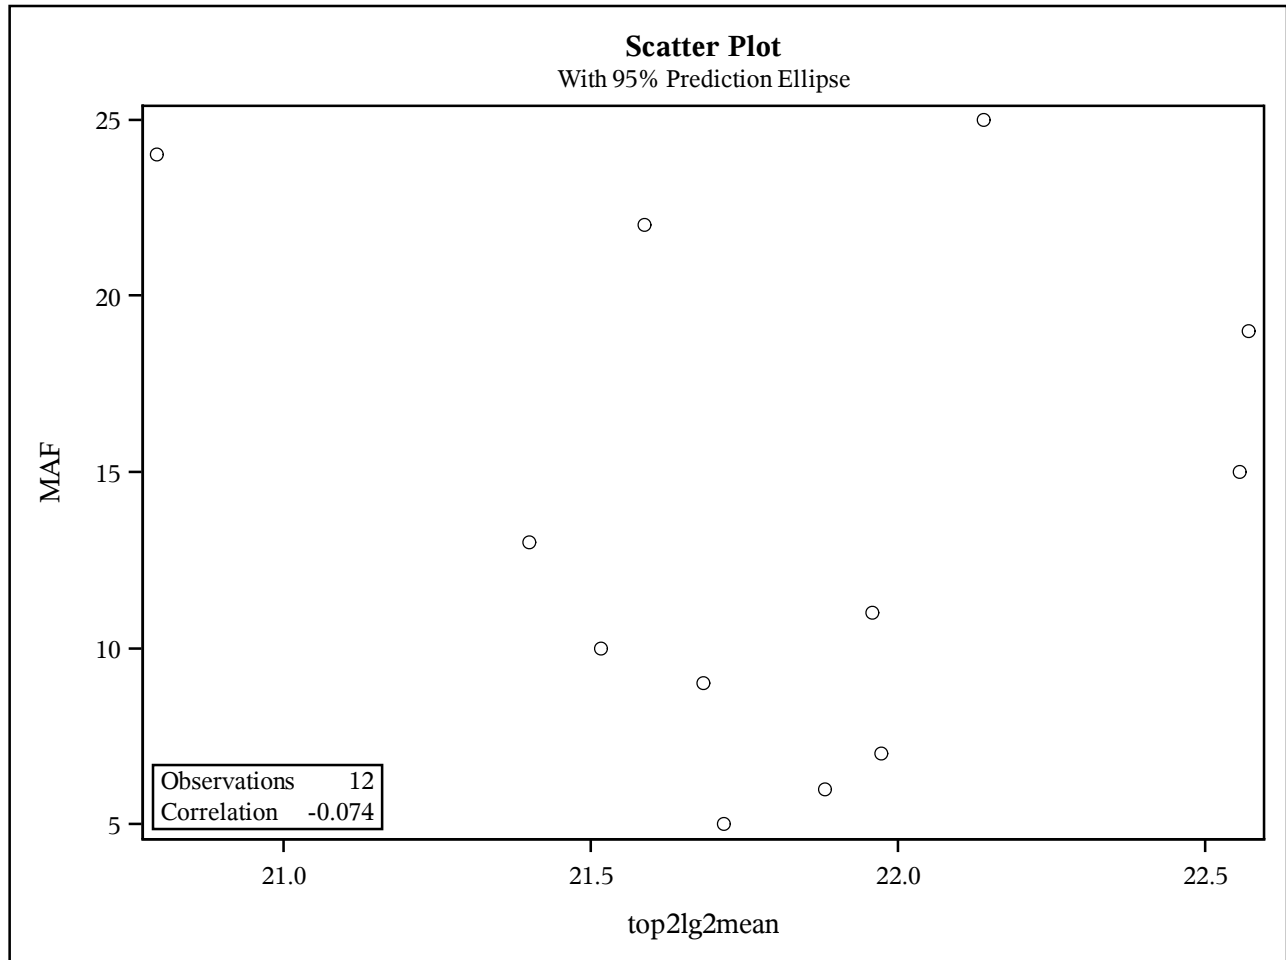

**Correlation C\_pooltop2lg2mean\_tp2 symbol MAF****The CORR Procedure**

Gene\_Symbol=SIRPA

2 Variables: top2lg2mean MAF

| Simple Statistics |    |          |         |           |          |          |
|-------------------|----|----------|---------|-----------|----------|----------|
| Variable          | N  | Mean     | Std Dev | Sum       | Minimum  | Maximum  |
| top2lg2mean       | 12 | 18.70502 | 0.32043 | 224.46021 | 18.32002 | 19.31147 |
| MAF               | 12 | 13.83333 | 7.10740 | 166.00000 | 5.00000  | 25.00000 |

| Pearson Correlation Coefficients, N = 12<br>Prob >  r  under H0: Rho=0 |                   |                   |
|------------------------------------------------------------------------|-------------------|-------------------|
|                                                                        | top2lg2mean       | MAF               |
| top2lg2mean                                                            | 1.00000           | 0.38309<br>0.2190 |
| MAF                                                                    | 0.38309<br>0.2190 | 1.00000           |

**Pearson Correlation Statistics (Fisher's z Transformation)**

| Variable    | With Variable | N  | Sample Correlation | Fisher's z | Bias Adjustment | Correlation Estimate | 95% Confidence Limits |          | p Value for H0:Rho=0 |
|-------------|---------------|----|--------------------|------------|-----------------|----------------------|-----------------------|----------|----------------------|
| top2lg2mean | MAF           | 12 | 0.38309            | 0.40367    | 0.01741         | 0.36813              | -0.260887             | 0.777723 | 0.2259               |

**Correlation  $C_{pooltop2lg2mean\_tp2}$  symbol MAF**

**The CORR Procedure**

Gene\_Symbol=SIRPA

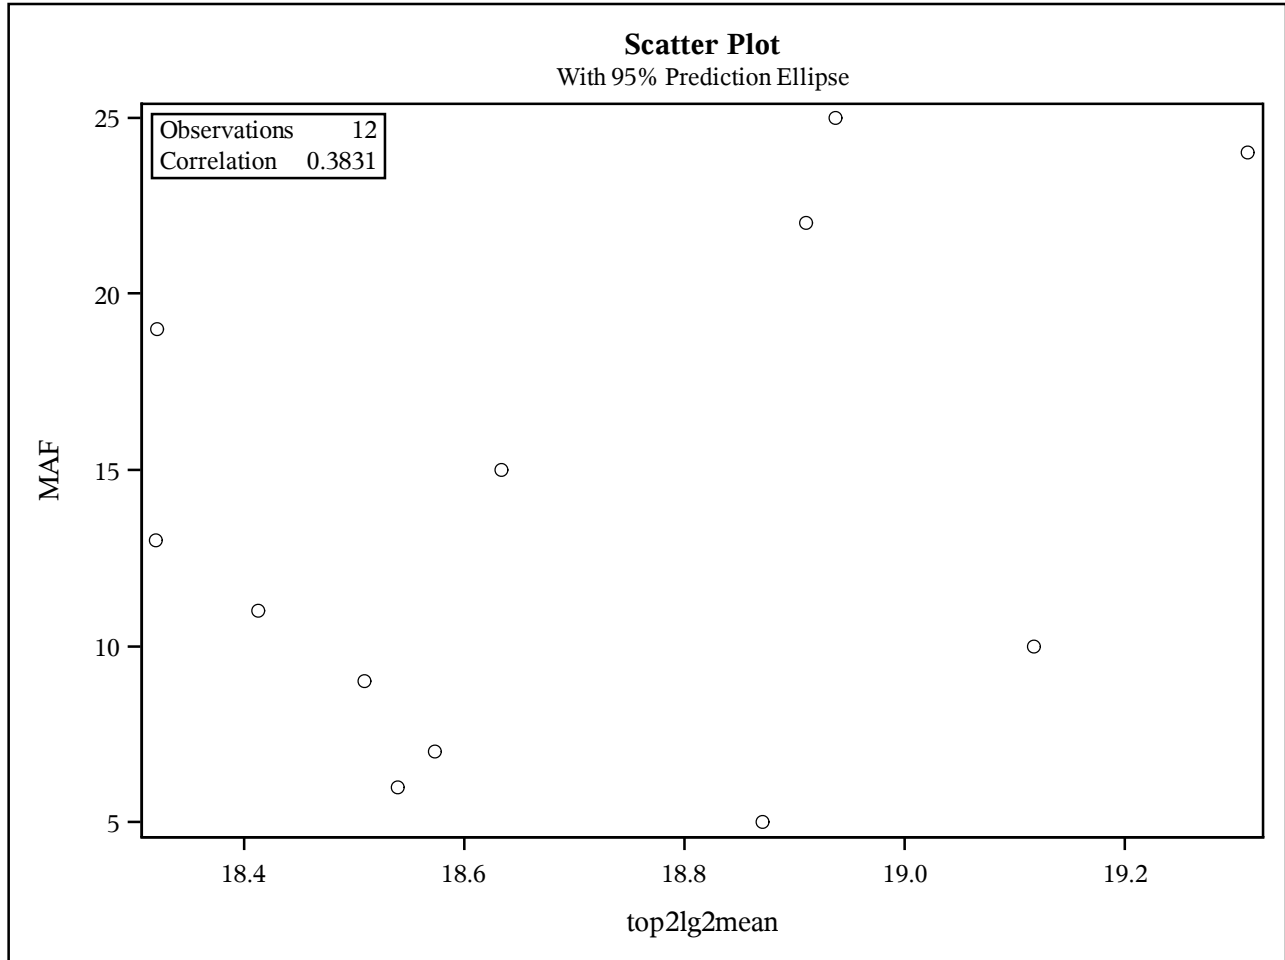

**Correlation C\_pooltop2lg2mean\_tp2 symbol MAF****The CORR Procedure**

Gene\_Symbol=SOD1

2 Variables: top2lg2mean MAF

| Simple Statistics |    |          |         |           |          |          |
|-------------------|----|----------|---------|-----------|----------|----------|
| Variable          | N  | Mean     | Std Dev | Sum       | Minimum  | Maximum  |
| top2lg2mean       | 12 | 23.16349 | 0.19007 | 277.96185 | 22.94400 | 23.52580 |
| MAF               | 12 | 13.83333 | 7.10740 | 166.00000 | 5.00000  | 25.00000 |

| Pearson Correlation Coefficients, N = 12<br>Prob >  r  under H0: Rho=0 |                    |                    |
|------------------------------------------------------------------------|--------------------|--------------------|
|                                                                        | top2lg2mean        | MAF                |
| top2lg2mean                                                            | 1.00000            | -0.31532<br>0.3181 |
| MAF                                                                    | -0.31532<br>0.3181 | 1.00000            |

| Pearson Correlation Statistics (Fisher's z Transformation) |               |    |                    |            |                 |                      |                       |          |                      |
|------------------------------------------------------------|---------------|----|--------------------|------------|-----------------|----------------------|-----------------------|----------|----------------------|
| Variable                                                   | With Variable | N  | Sample Correlation | Fisher's z | Bias Adjustment | Correlation Estimate | 95% Confidence Limits |          | p Value for H0:Rho=0 |
| top2lg2mean                                                | MAF           | 12 | -0.31532           | -0.32644   | -0.01433        | -0.30236             | -0.746690             | 0.328558 | 0.3274               |

**Correlation C\_pooltop2lg2mean\_tp2 symbol MAF****The CORR Procedure**

Gene\_Symbol=SOD1

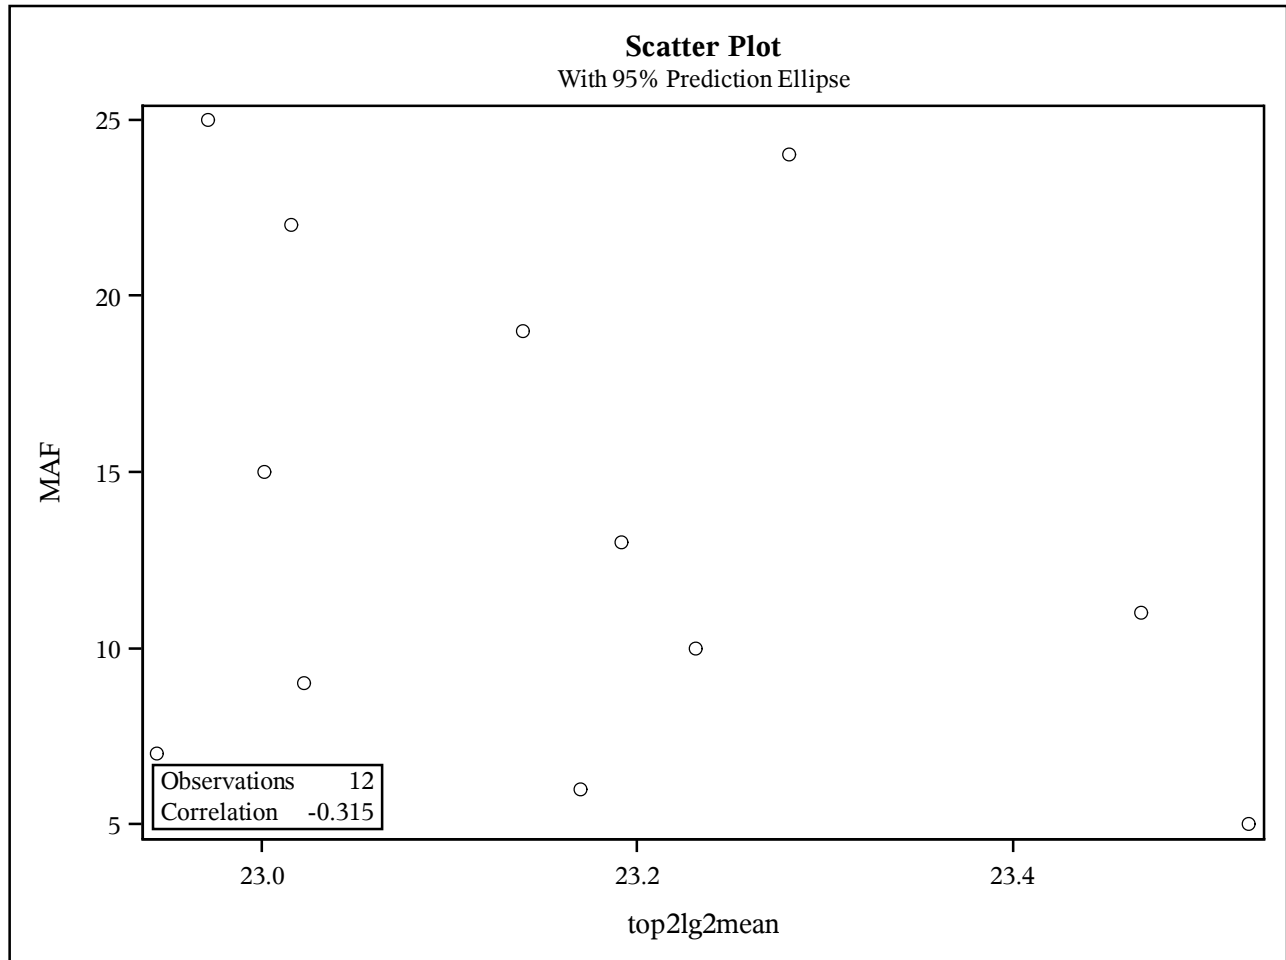



**Correlation C\_pooltop2lg2mean\_tp2 symbol MAF****The CORR Procedure**

Gene\_Symbol=SOD3

2 Variables: top2lg2mean MAF

| Simple Statistics |    |          |         |           |          |          |
|-------------------|----|----------|---------|-----------|----------|----------|
| Variable          | N  | Mean     | Std Dev | Sum       | Minimum  | Maximum  |
| top2lg2mean       | 12 | 20.89297 | 0.47158 | 250.71558 | 19.97754 | 21.33323 |
| MAF               | 12 | 13.83333 | 7.10740 | 166.00000 | 5.00000  | 25.00000 |

| Pearson Correlation Coefficients, N = 12<br>Prob >  r  under H0: Rho=0 |                    |                    |
|------------------------------------------------------------------------|--------------------|--------------------|
|                                                                        | top2lg2mean        | MAF                |
| top2lg2mean                                                            | 1.00000            | -0.32876<br>0.2968 |
| MAF                                                                    | -0.32876<br>0.2968 | 1.00000            |

| Pearson Correlation Statistics (Fisher's z Transformation) |               |    |                    |            |                 |                      |                       |          |                      |
|------------------------------------------------------------|---------------|----|--------------------|------------|-----------------|----------------------|-----------------------|----------|----------------------|
| Variable                                                   | With Variable | N  | Sample Correlation | Fisher's z | Bias Adjustment | Correlation Estimate | 95% Confidence Limits |          | p Value for H0:Rho=0 |
| top2lg2mean                                                | MAF           | 12 | -0.32876           | -0.34144   | -0.01494        | -0.31537             | -0.752987             | 0.315665 | 0.3057               |

**Correlation C\_pooltop2lg2mean\_tp2 symbol MAF****The CORR Procedure**

Gene\_Symbol=SOD3

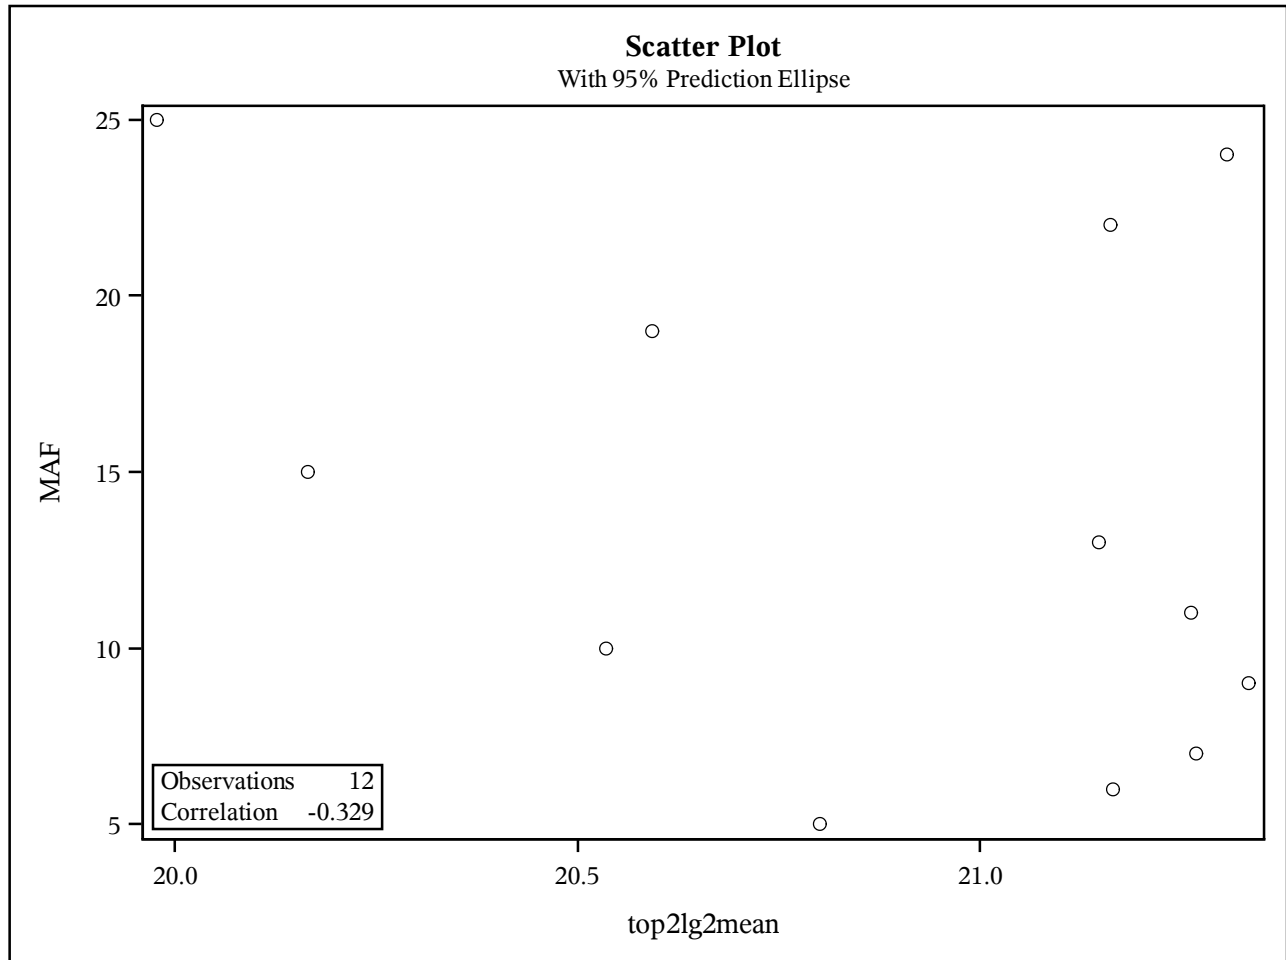

**Correlation C\_pooltop2lg2mean\_tp2 symbol MAF****The CORR Procedure**

Gene\_Symbol=SPARCL1

2 Variables: top2lg2mean MAF

| Simple Statistics |    |          |         |           |          |          |
|-------------------|----|----------|---------|-----------|----------|----------|
| Variable          | N  | Mean     | Std Dev | Sum       | Minimum  | Maximum  |
| top2lg2mean       | 12 | 21.56743 | 0.29155 | 258.80916 | 20.82870 | 22.02751 |
| MAF               | 12 | 13.83333 | 7.10740 | 166.00000 | 5.00000  | 25.00000 |

| Pearson Correlation Coefficients, N = 12<br>Prob >  r  under H0: Rho=0 |                   |                   |
|------------------------------------------------------------------------|-------------------|-------------------|
|                                                                        | top2lg2mean       | MAF               |
| top2lg2mean                                                            | 1.00000           | 0.47057<br>0.1226 |
| MAF                                                                    | 0.47057<br>0.1226 | 1.00000           |

**Pearson Correlation Statistics (Fisher's z Transformation)**

| Variable    | With Variable | N  | Sample Correlation | Fisher's z | Bias Adjustment | Correlation Estimate | 95% Confidence Limits |          | p Value for H0:Rho=0 |
|-------------|---------------|----|--------------------|------------|-----------------|----------------------|-----------------------|----------|----------------------|
| top2lg2mean | MAF           | 12 | 0.47057            | 0.51080    | 0.02139         | 0.45375              | -0.162458             | 0.815332 | 0.1254               |

**Correlation C\_pooltop2lg2mean\_tp2 symbol MAF****The CORR Procedure**

Gene\_Symbol=SPARCL1

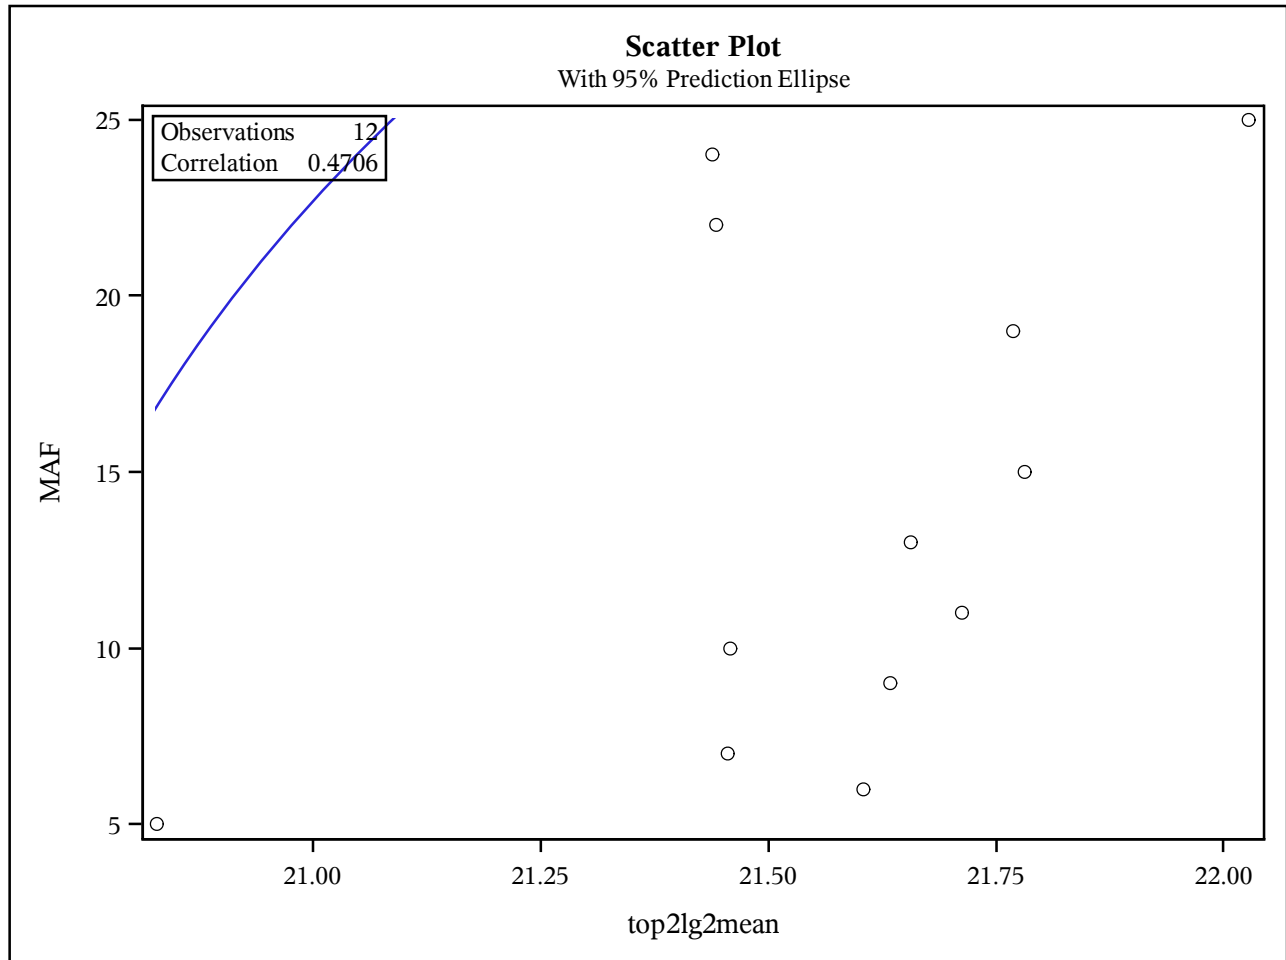

**Correlation C\_pooltop2lg2mean\_tp2 symbol MAF****The CORR Procedure**

Gene\_Symbol=SPP1

2 Variables: top2lg2mean MAF

| Simple Statistics |    |          |         |           |          |          |
|-------------------|----|----------|---------|-----------|----------|----------|
| Variable          | N  | Mean     | Std Dev | Sum       | Minimum  | Maximum  |
| top2lg2mean       | 12 | 21.53026 | 0.31804 | 258.36306 | 20.94234 | 21.95977 |
| MAF               | 12 | 13.83333 | 7.10740 | 166.00000 | 5.00000  | 25.00000 |

| Pearson Correlation Coefficients, N = 12<br>Prob >  r  under H0: Rho=0 |                   |                   |
|------------------------------------------------------------------------|-------------------|-------------------|
|                                                                        | top2lg2mean       | MAF               |
| top2lg2mean                                                            | 1.00000           | 0.62353<br>0.0303 |
| MAF                                                                    | 0.62353<br>0.0303 | 1.00000           |

| Pearson Correlation Statistics (Fisher's z Transformation) |               |    |                    |            |                 |                      |                       |          |                      |
|------------------------------------------------------------|---------------|----|--------------------|------------|-----------------|----------------------|-----------------------|----------|----------------------|
| Variable                                                   | With Variable | N  | Sample Correlation | Fisher's z | Bias Adjustment | Correlation Estimate | 95% Confidence Limits |          | p Value for H0:Rho=0 |
| top2lg2mean                                                | MAF           | 12 | 0.62353            | 0.73076    | 0.02834         | 0.60590              | 0.049061              | 0.875402 | 0.0284               |

**Correlation C\_pooltop2lg2mean\_tp2 symbol MAF**

**The CORR Procedure**

Gene\_Symbol=SPP1

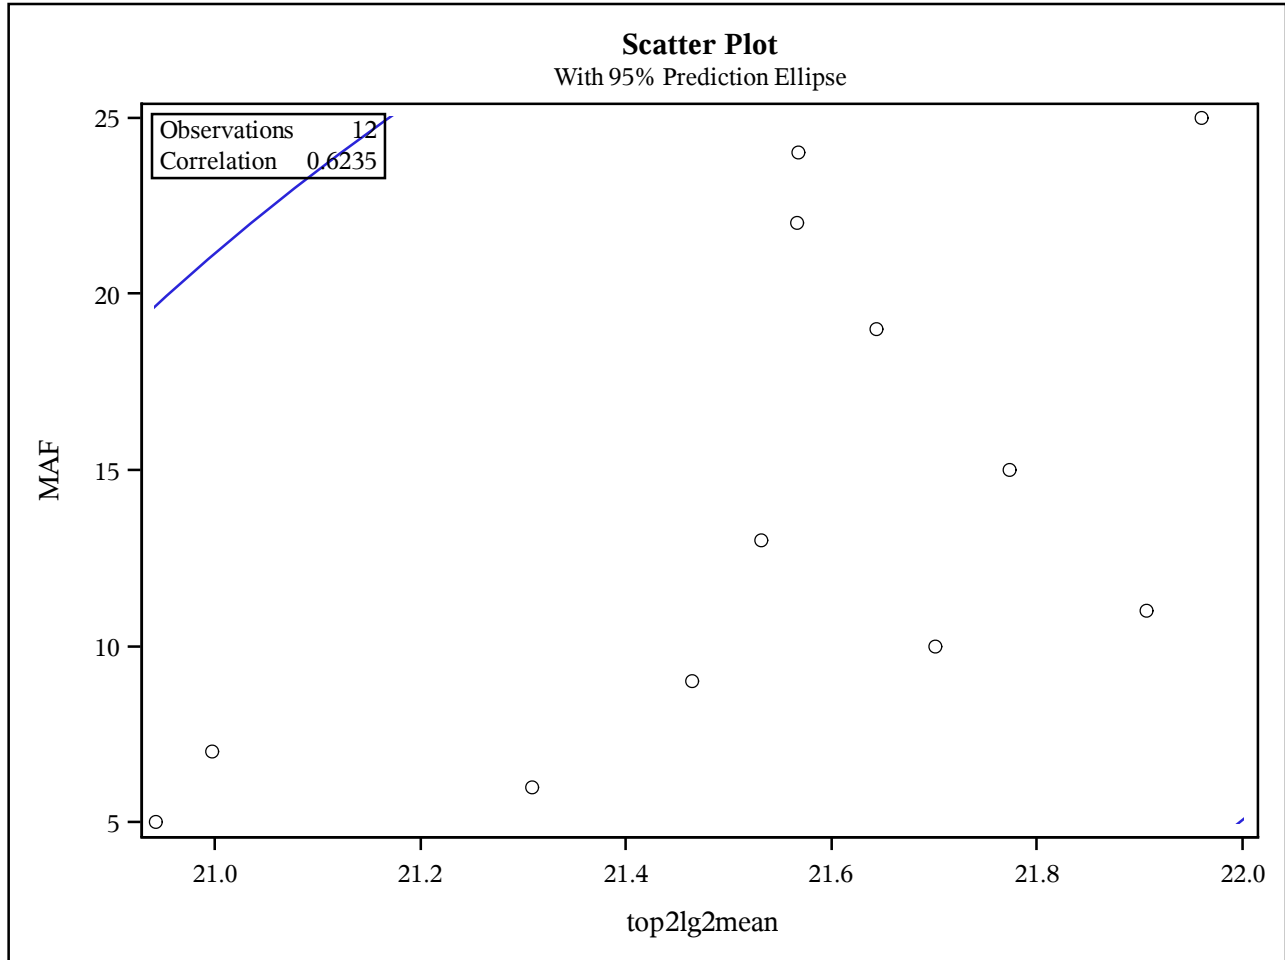

**Correlation C\_pooltop2lg2mean\_tp2 symbol MAF****The CORR Procedure**

Gene\_Symbol=THY1

2 Variables: top2lg2mean MAF

| Simple Statistics |    |          |         |           |          |          |
|-------------------|----|----------|---------|-----------|----------|----------|
| Variable          | N  | Mean     | Std Dev | Sum       | Minimum  | Maximum  |
| top2lg2mean       | 12 | 21.42731 | 0.30687 | 257.12772 | 20.79614 | 21.87430 |
| MAF               | 12 | 13.83333 | 7.10740 | 166.00000 | 5.00000  | 25.00000 |

| Pearson Correlation Coefficients, N = 12<br>Prob >  r  under H0: Rho=0 |                   |                   |
|------------------------------------------------------------------------|-------------------|-------------------|
|                                                                        | top2lg2mean       | MAF               |
| top2lg2mean                                                            | 1.00000           | 0.37242<br>0.2332 |
| MAF                                                                    | 0.37242<br>0.2332 | 1.00000           |

**Pearson Correlation Statistics (Fisher's z Transformation)**

| Variable    | With Variable | N  | Sample Correlation | Fisher's z | Bias Adjustment | Correlation Estimate | 95% Confidence Limits |          | p Value for H0:Rho=0 |
|-------------|---------------|----|--------------------|------------|-----------------|----------------------|-----------------------|----------|----------------------|
| top2lg2mean | MAF           | 12 | 0.37242            | 0.39122    | 0.01693         | 0.35774              | -0.272002             | 0.772951 | 0.2405               |

**Correlation C\_pooltop2lg2mean\_tp2 symbol MAF**

**The CORR Procedure**

Gene\_Symbol=THY1

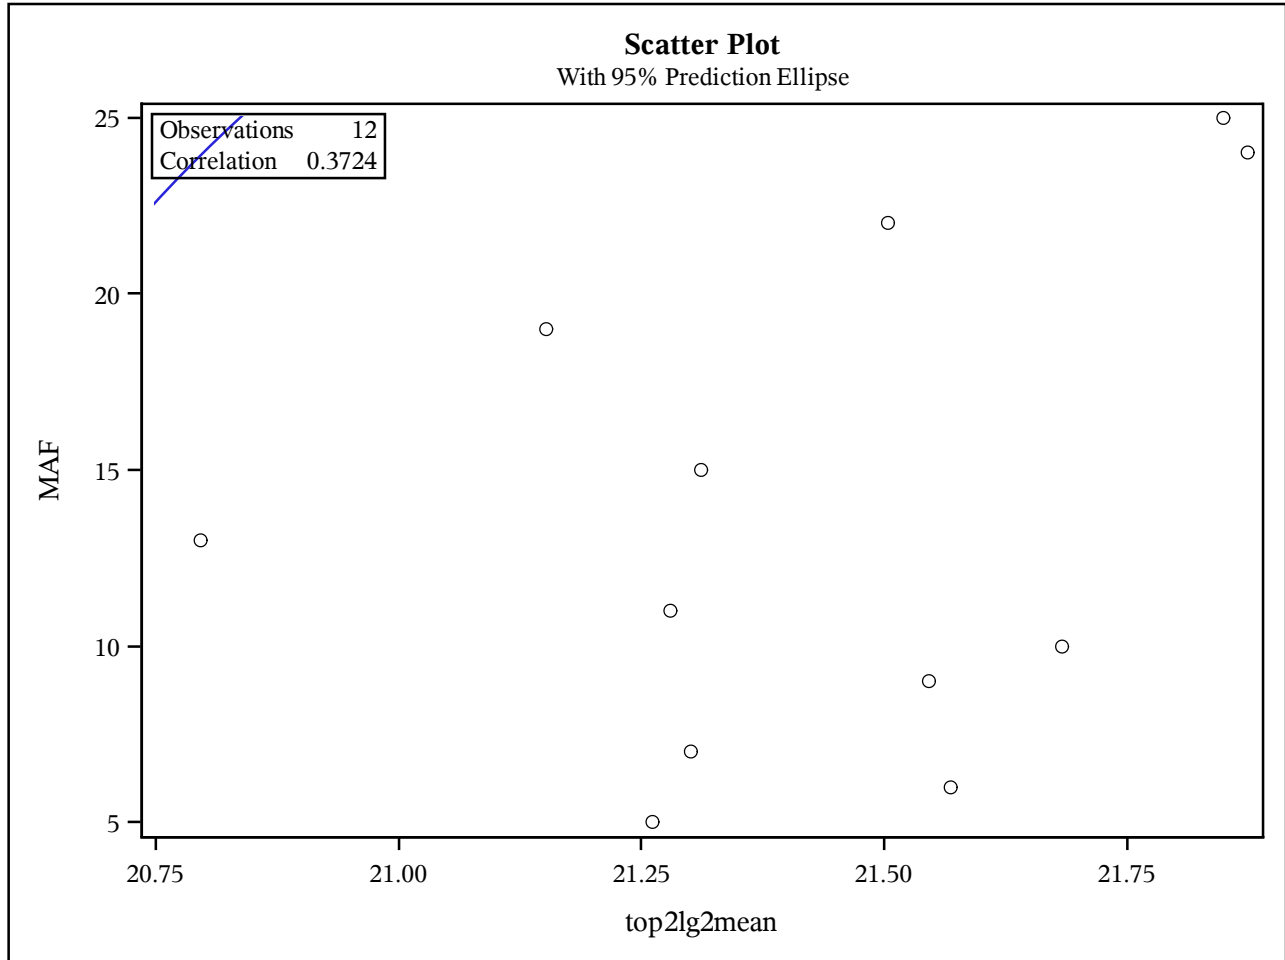



**Correlation C\_pooltop2lg2mean\_tp2 symbol MAF****The CORR Procedure**

Gene\_Symbol=TTR

2 Variables: top2lg2mean MAF

| Simple Statistics |    |          |         |           |          |          |
|-------------------|----|----------|---------|-----------|----------|----------|
| Variable          | N  | Mean     | Std Dev | Sum       | Minimum  | Maximum  |
| top2lg2mean       | 12 | 27.71611 | 0.13881 | 332.59337 | 27.42233 | 27.91455 |
| MAF               | 12 | 13.83333 | 7.10740 | 166.00000 | 5.00000  | 25.00000 |

| Pearson Correlation Coefficients, N = 12<br>Prob >  r  under H0: Rho=0 |                   |                   |
|------------------------------------------------------------------------|-------------------|-------------------|
|                                                                        | top2lg2mean       | MAF               |
| top2lg2mean                                                            | 1.00000           | 0.14512<br>0.6527 |
| MAF                                                                    | 0.14512<br>0.6527 | 1.00000           |

**Pearson Correlation Statistics (Fisher's z Transformation)**

| Variable    | With Variable | N  | Sample Correlation | Fisher's z | Bias Adjustment | Correlation Estimate | 95% Confidence Limits |          | p Value for H0:Rho=0 |
|-------------|---------------|----|--------------------|------------|-----------------|----------------------|-----------------------|----------|----------------------|
| top2lg2mean | MAF           | 12 | 0.14512            | 0.14615    | 0.00660         | 0.13866              | -0.472874             | 0.660036 | 0.6611               |

**Correlation  $C_{pooltop2lg2mean\_tp2}$  symbol MAF****The CORR Procedure**

Gene\_Symbol=TTR

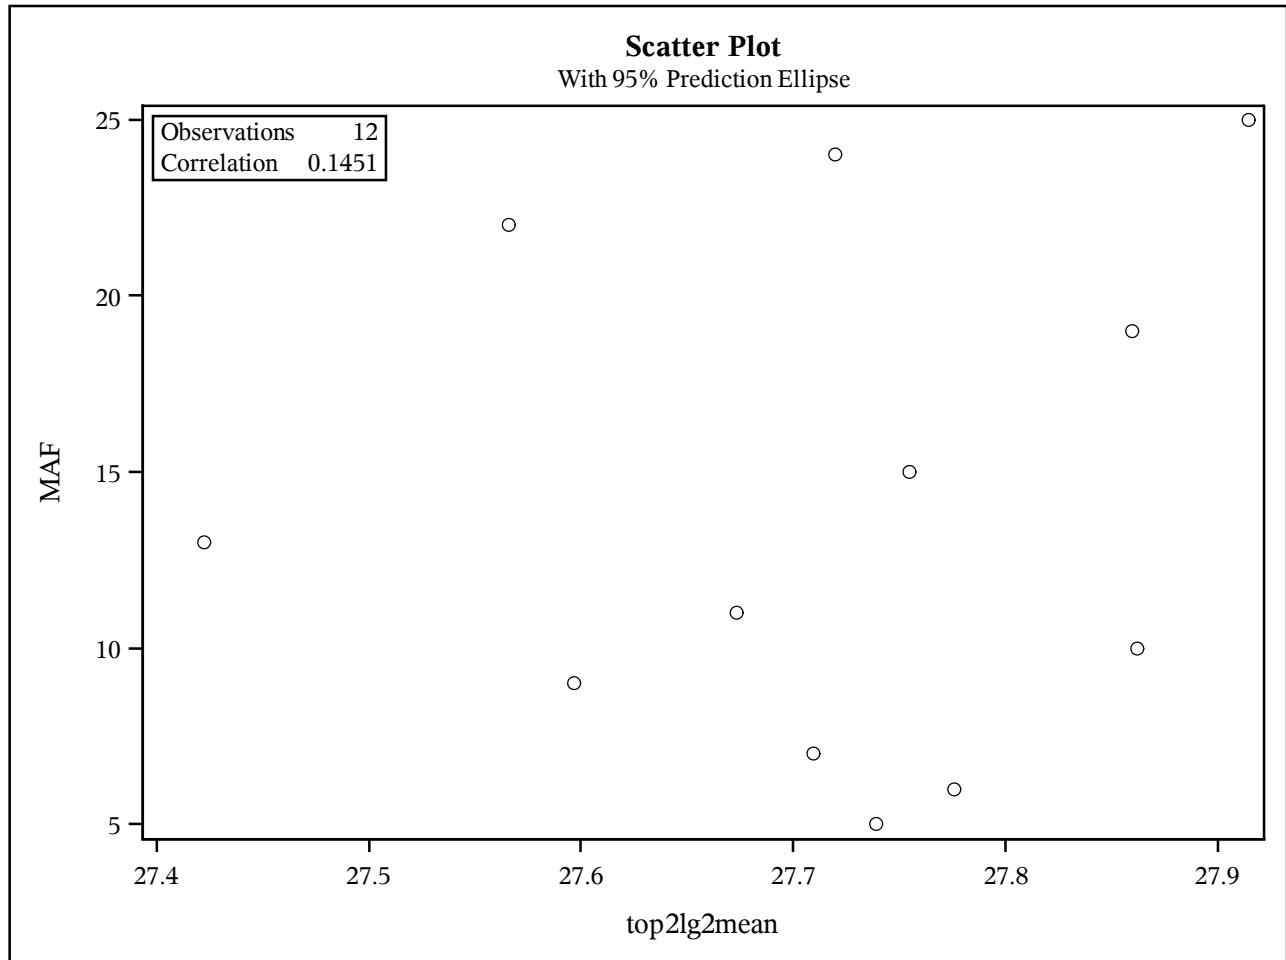

**Correlation C\_pooltop2lg2mean\_tp2 symbol MAF****The CORR Procedure**

Gene\_Symbol=UBA52

2 Variables: top2lg2mean MAF

| Simple Statistics |    |          |         |           |          |          |
|-------------------|----|----------|---------|-----------|----------|----------|
| Variable          | N  | Mean     | Std Dev | Sum       | Minimum  | Maximum  |
| top2lg2mean       | 12 | 20.04327 | 0.66303 | 240.51925 | 18.84271 | 21.12546 |
| MAF               | 12 | 13.83333 | 7.10740 | 166.00000 | 5.00000  | 25.00000 |

| Pearson Correlation Coefficients, N = 12<br>Prob >  r  under H0: Rho=0 |                   |                   |
|------------------------------------------------------------------------|-------------------|-------------------|
|                                                                        | top2lg2mean       | MAF               |
| top2lg2mean                                                            | 1.00000           | 0.66990<br>0.0172 |
| MAF                                                                    | 0.66990<br>0.0172 | 1.00000           |

| Pearson Correlation Statistics (Fisher's z Transformation) |               |    |                    |            |                 |                      |                       |          |                      |
|------------------------------------------------------------|---------------|----|--------------------|------------|-----------------|----------------------|-----------------------|----------|----------------------|
| Variable                                                   | With Variable | N  | Sample Correlation | Fisher's z | Bias Adjustment | Correlation Estimate | 95% Confidence Limits |          | p Value for H0:Rho=0 |
| top2lg2mean                                                | MAF           | 12 | 0.66990            | 0.81056    | 0.03045         | 0.65277              | 0.126116              | 0.892368 | 0.0150               |

**Correlation C\_pooltop2lg2mean\_tp2 symbol MAF**

**The CORR Procedure**

Gene\_Symbol=UBA52

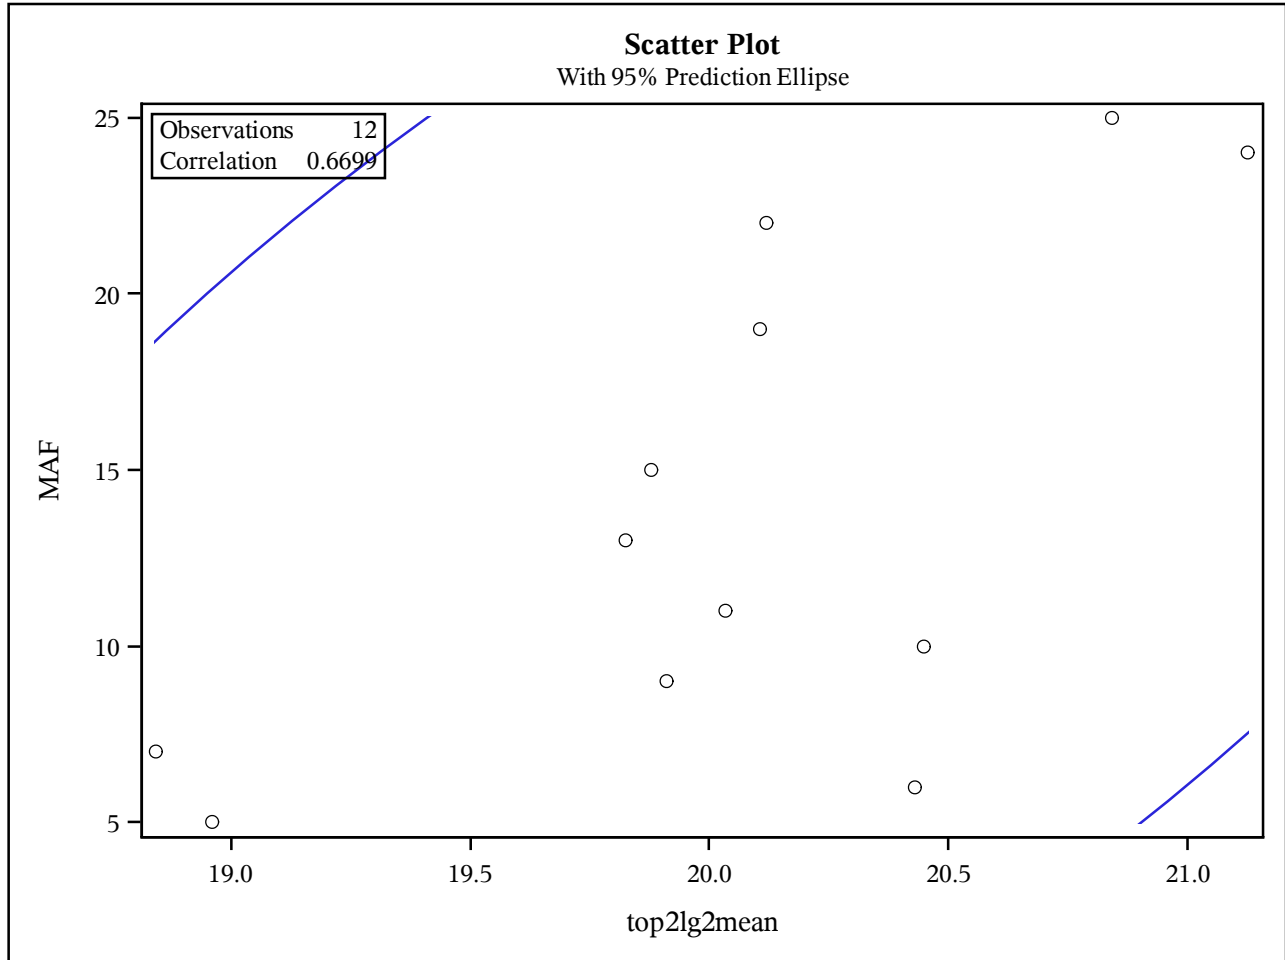

**Correlation C\_pooltop2lg2mean\_tp2 symbol MAF****The CORR Procedure**

Gene\_Symbol=VGF

2 Variables: top2lg2mean MAF

| Simple Statistics |    |          |         |           |          |          |
|-------------------|----|----------|---------|-----------|----------|----------|
| Variable          | N  | Mean     | Std Dev | Sum       | Minimum  | Maximum  |
| top2lg2mean       | 12 | 17.78075 | 0.64762 | 213.36900 | 16.63359 | 18.78800 |
| MAF               | 12 | 13.83333 | 7.10740 | 166.00000 | 5.00000  | 25.00000 |

| Pearson Correlation Coefficients, N = 12<br>Prob >  r  under H0: Rho=0 |                    |                    |
|------------------------------------------------------------------------|--------------------|--------------------|
|                                                                        | top2lg2mean        | MAF                |
| top2lg2mean                                                            | 1.00000            | -0.45136<br>0.1408 |
| MAF                                                                    | -0.45136<br>0.1408 | 1.00000            |

**Pearson Correlation Statistics (Fisher's z Transformation)**

| Variable    | With Variable | N  | Sample Correlation | Fisher's z | Bias Adjustment | Correlation Estimate | 95% Confidence Limits |          | p Value for H0:Rho=0 |
|-------------|---------------|----|--------------------|------------|-----------------|----------------------|-----------------------|----------|----------------------|
| top2lg2mean | MAF           | 12 | -0.45136           | -0.48641   | -0.02052        | -0.43488             | -0.807297             | 0.185261 | 0.1445               |

**Correlation C\_pooltop2lg2mean\_tp2 symbol MAF****The CORR Procedure**

Gene\_Symbol=VGF

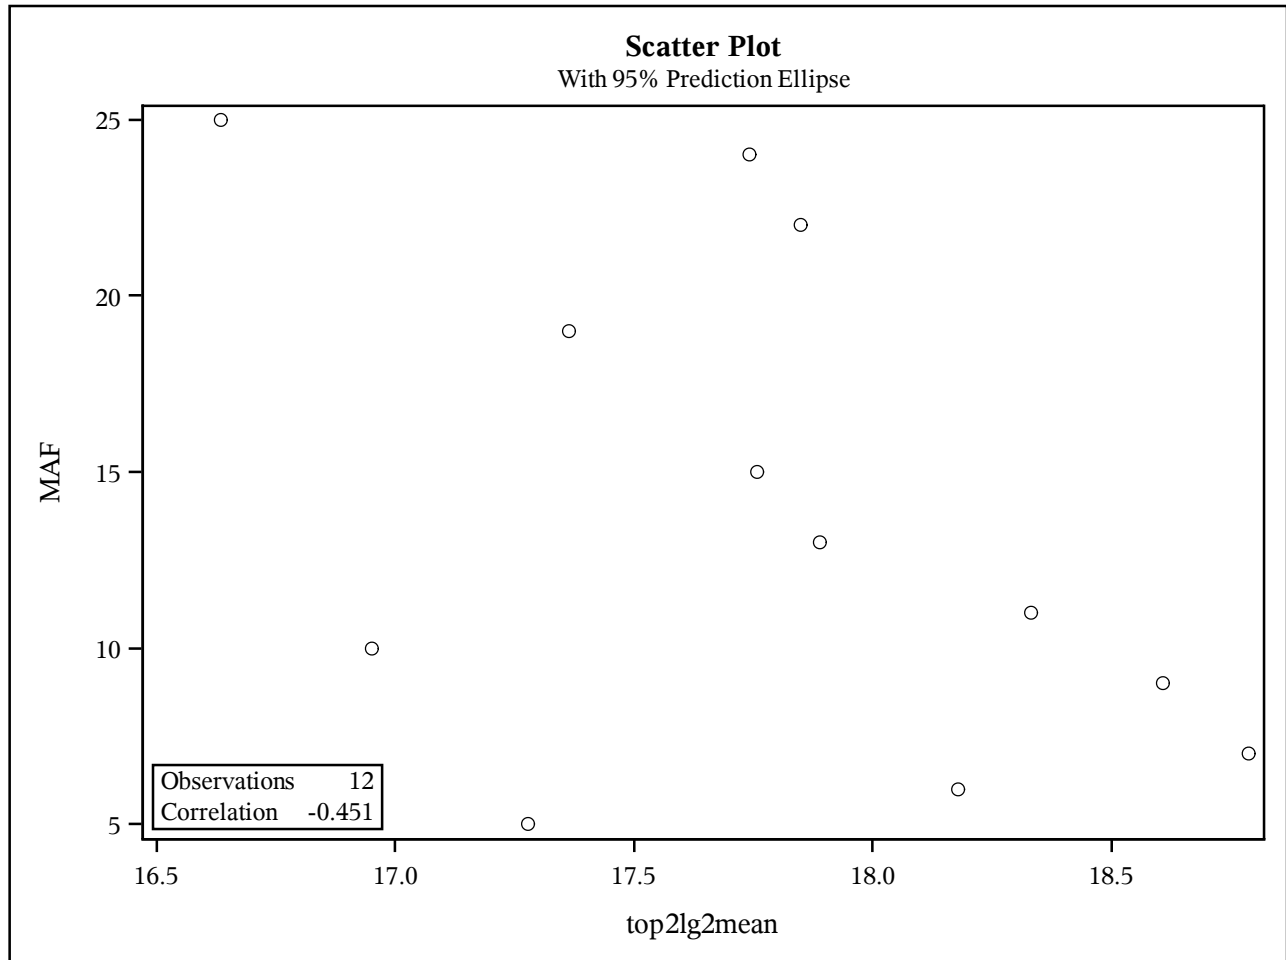

**Correlation C\_pooltop2lg2mean\_tp2 symbol MAF****The CORR Procedure**

Gene\_Symbol=VSTM2A

2 Variables: top2lg2mean MAF

| Simple Statistics |    |          |         |           |          |          |
|-------------------|----|----------|---------|-----------|----------|----------|
| Variable          | N  | Mean     | Std Dev | Sum       | Minimum  | Maximum  |
| top2lg2mean       | 12 | 18.95094 | 0.20903 | 227.41134 | 18.48949 | 19.22659 |
| MAF               | 12 | 13.83333 | 7.10740 | 166.00000 | 5.00000  | 25.00000 |

| Pearson Correlation Coefficients, N = 12<br>Prob >  r  under H0: Rho=0 |                   |                   |
|------------------------------------------------------------------------|-------------------|-------------------|
|                                                                        | top2lg2mean       | MAF               |
| top2lg2mean                                                            | 1.00000           | 0.50398<br>0.0948 |
| MAF                                                                    | 0.50398<br>0.0948 | 1.00000           |

**Pearson Correlation Statistics (Fisher's z Transformation)**

| Variable    | With Variable | N  | Sample Correlation | Fisher's z | Bias Adjustment | Correlation Estimate | 95% Confidence Limits |          | p Value for H0:Rho=0 |
|-------------|---------------|----|--------------------|------------|-----------------|----------------------|-----------------------|----------|----------------------|
| top2lg2mean | MAF           | 12 | 0.50398            | 0.55463    | 0.02291         | 0.48670              | -0.121003             | 0.829036 | 0.0961               |

**Correlation C\_pooltop2lg2mean\_tp2 symbol MAF**

**The CORR Procedure**

Gene\_Symbol=VSTM2A

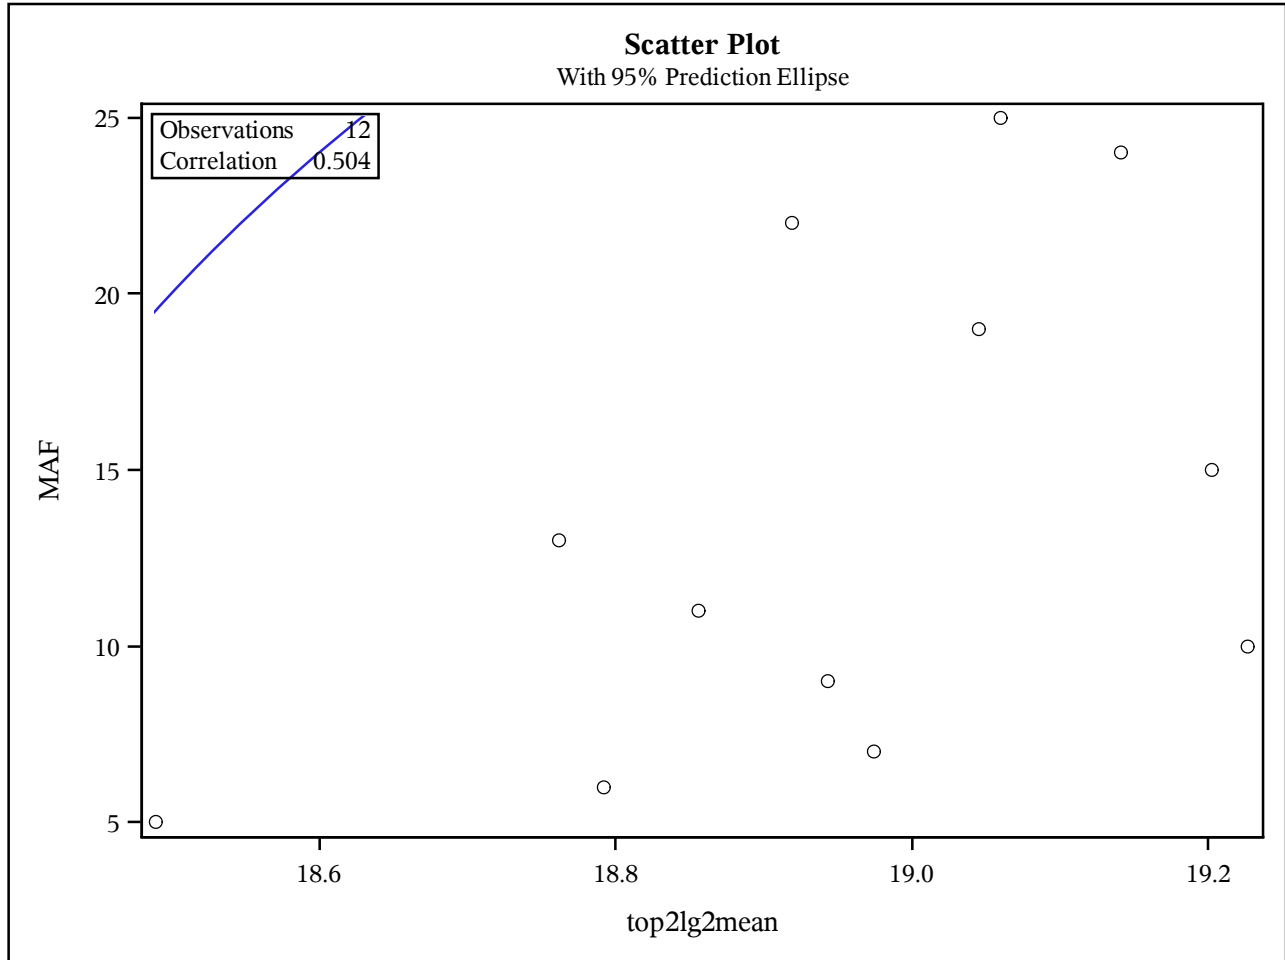



**Correlation C\_pooltop2lg2mean\_tp2 symbol MAF****The CORR Procedure**

Gene\_Symbol=VTN

2 Variables: top2lg2mean MAF

| Simple Statistics |    |          |         |           |          |          |
|-------------------|----|----------|---------|-----------|----------|----------|
| Variable          | N  | Mean     | Std Dev | Sum       | Minimum  | Maximum  |
| top2lg2mean       | 12 | 16.88153 | 0.66936 | 202.57832 | 16.23902 | 18.58806 |
| MAF               | 12 | 13.83333 | 7.10740 | 166.00000 | 5.00000  | 25.00000 |

| Pearson Correlation Coefficients, N = 12<br>Prob >  r  under H0: Rho=0 |                    |                    |
|------------------------------------------------------------------------|--------------------|--------------------|
|                                                                        | top2lg2mean        | MAF                |
| top2lg2mean                                                            | 1.00000            | -0.41375<br>0.1812 |
| MAF                                                                    | -0.41375<br>0.1812 | 1.00000            |

**Pearson Correlation Statistics (Fisher's z Transformation)**

| Variable    | With Variable | N  | Sample Correlation | Fisher's z | Bias Adjustment | Correlation Estimate | 95% Confidence Limits |          | p Value for H0:Rho=0 |
|-------------|---------------|----|--------------------|------------|-----------------|----------------------|-----------------------|----------|----------------------|
| top2lg2mean | MAF           | 12 | -0.41375           | -0.44013   | -0.01881        | -0.39804             | -0.791204             | 0.227924 | 0.1867               |

**Correlation C\_pooltop2lg2mean\_tp2 symbol MAF**

**The CORR Procedure**

Gene\_Symbol=VTN

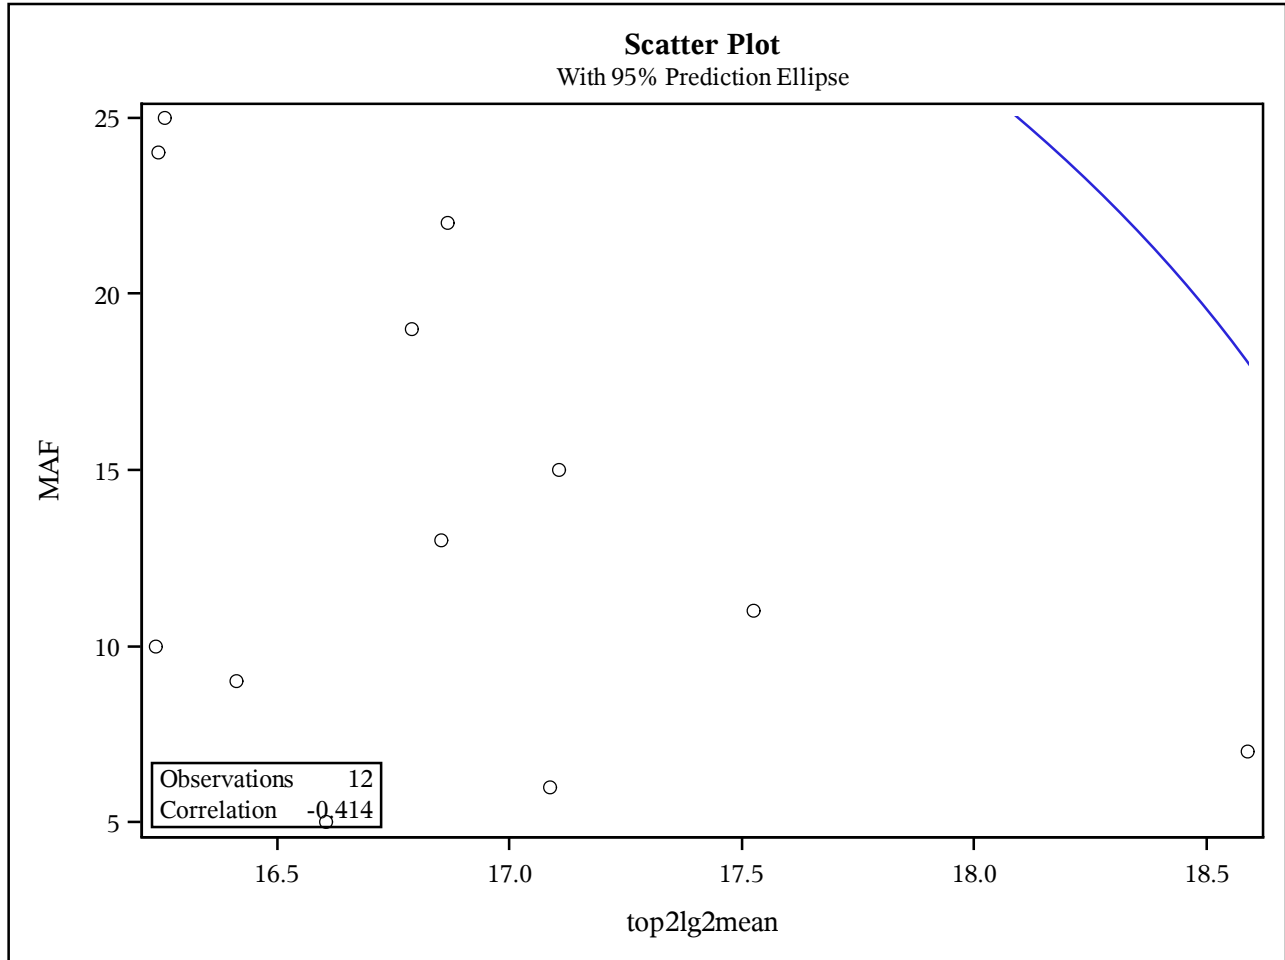

Supplement: pone.0064314.s012.pdf [file pone.0064314.s012.pdf]
