# Supplementary material for: Quantitative Label-Free Proteomics for Discovery of Biomarkers in Cerebrospinal Fluid: Assessment of Technical and Inter-Individual Variation
Source: PubMed Central journal article supplement (PMC3659127; doi:10.1371/journal.pone.0064314), 2013-05-20

**Correlation C\_pooltop2lg2mean\_tp2 symbol LCMS****The CORR Procedure**

Gene\_Symbol=A1BG

2 Variables: top2lg2mean LCMS

| Simple Statistics |    |          |         |           |          |          |
|-------------------|----|----------|---------|-----------|----------|----------|
| Variable          | N  | Mean     | Std Dev | Sum       | Minimum  | Maximum  |
| top2lg2mean       | 12 | 22.57461 | 0.11608 | 270.89531 | 22.29520 | 22.78045 |
| LCMS              | 12 | 11.75000 | 8.70867 | 141.00000 | 1.00000  | 24.00000 |

| Pearson Correlation Coefficients, N = 12<br>Prob >  r  under H0: Rho=0 |                   |                   |
|------------------------------------------------------------------------|-------------------|-------------------|
|                                                                        | top2lg2mean       | LCMS              |
| top2lg2mean                                                            | 1.00000           | 0.44971<br>0.1424 |
| LCMS                                                                   | 0.44971<br>0.1424 | 1.00000           |

**Pearson Correlation Statistics (Fisher's z Transformation)**

| Variable    | With Variable | N  | Sample Correlation | Fisher's z | Bias Adjustment | Correlation Estimate | 95% Confidence Limits |          | p Value for H0:Rho=0 |
|-------------|---------------|----|--------------------|------------|-----------------|----------------------|-----------------------|----------|----------------------|
| top2lg2mean | LCMS          | 12 | 0.44971            | 0.48433    | 0.02044         | 0.43325              | -0.187195             | 0.806598 | 0.1462               |

**Correlation C\_pooltop2lg2mean\_tp2 symbol LCMS**

**The CORR Procedure**

Gene\_Symbol=A1BG

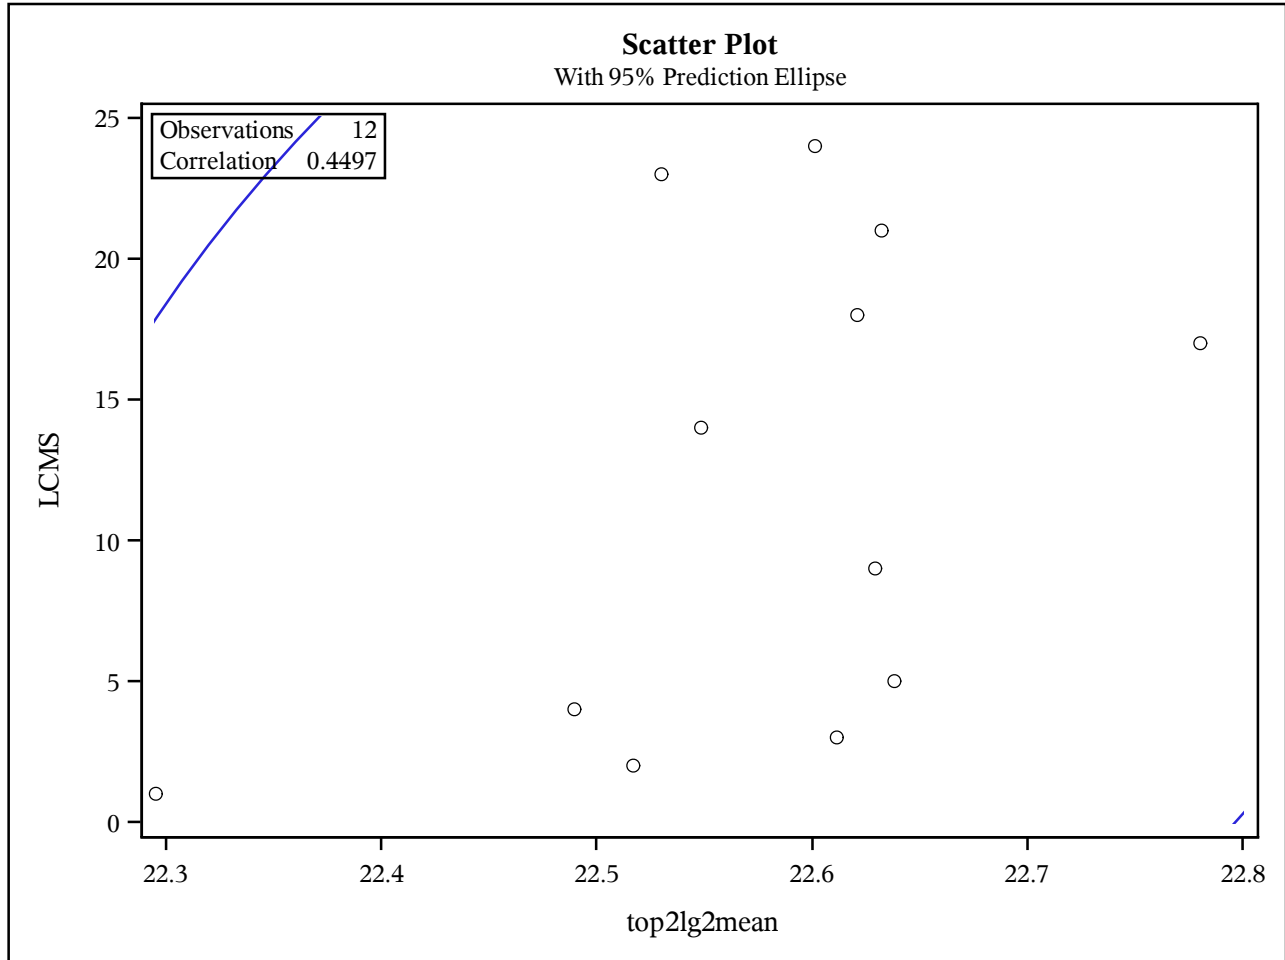

**Correlation C\_pooltop2lg2mean\_tp2 symbol LCMS****The CORR Procedure**

Gene\_Symbol=A2M

2 Variables: top2lg2mean LCMS

| Simple Statistics |    |          |         |           |          |          |
|-------------------|----|----------|---------|-----------|----------|----------|
| Variable          | N  | Mean     | Std Dev | Sum       | Minimum  | Maximum  |
| top2lg2mean       | 12 | 23.51360 | 0.37790 | 282.16326 | 22.83730 | 24.15903 |
| LCMS              | 12 | 11.75000 | 8.70867 | 141.00000 | 1.00000  | 24.00000 |

| Pearson Correlation Coefficients, N = 12<br>Prob >  r  under H0: Rho=0 |                    |                    |
|------------------------------------------------------------------------|--------------------|--------------------|
|                                                                        | top2lg2mean        | LCMS               |
| top2lg2mean                                                            | 1.00000            | -0.21330<br>0.5056 |
| LCMS                                                                   | -0.21330<br>0.5056 | 1.00000            |

**Pearson Correlation Statistics (Fisher's z Transformation)**

| Variable    | With Variable | N  | Sample Correlation | Fisher's z | Bias Adjustment | Correlation Estimate | 95% Confidence Limits |          | p Value for H0:Rho=0 |
|-------------|---------------|----|--------------------|------------|-----------------|----------------------|-----------------------|----------|----------------------|
| top2lg2mean | LCMS          | 12 | -0.21330           | -0.21663   | -0.00970        | -0.20403             | -0.696390             | 0.418924 | 0.5158               |

**Correlation C\_pooltop2lg2mean\_tp2 symbol LCMS**

**The CORR Procedure**

Gene\_Symbol=A2M

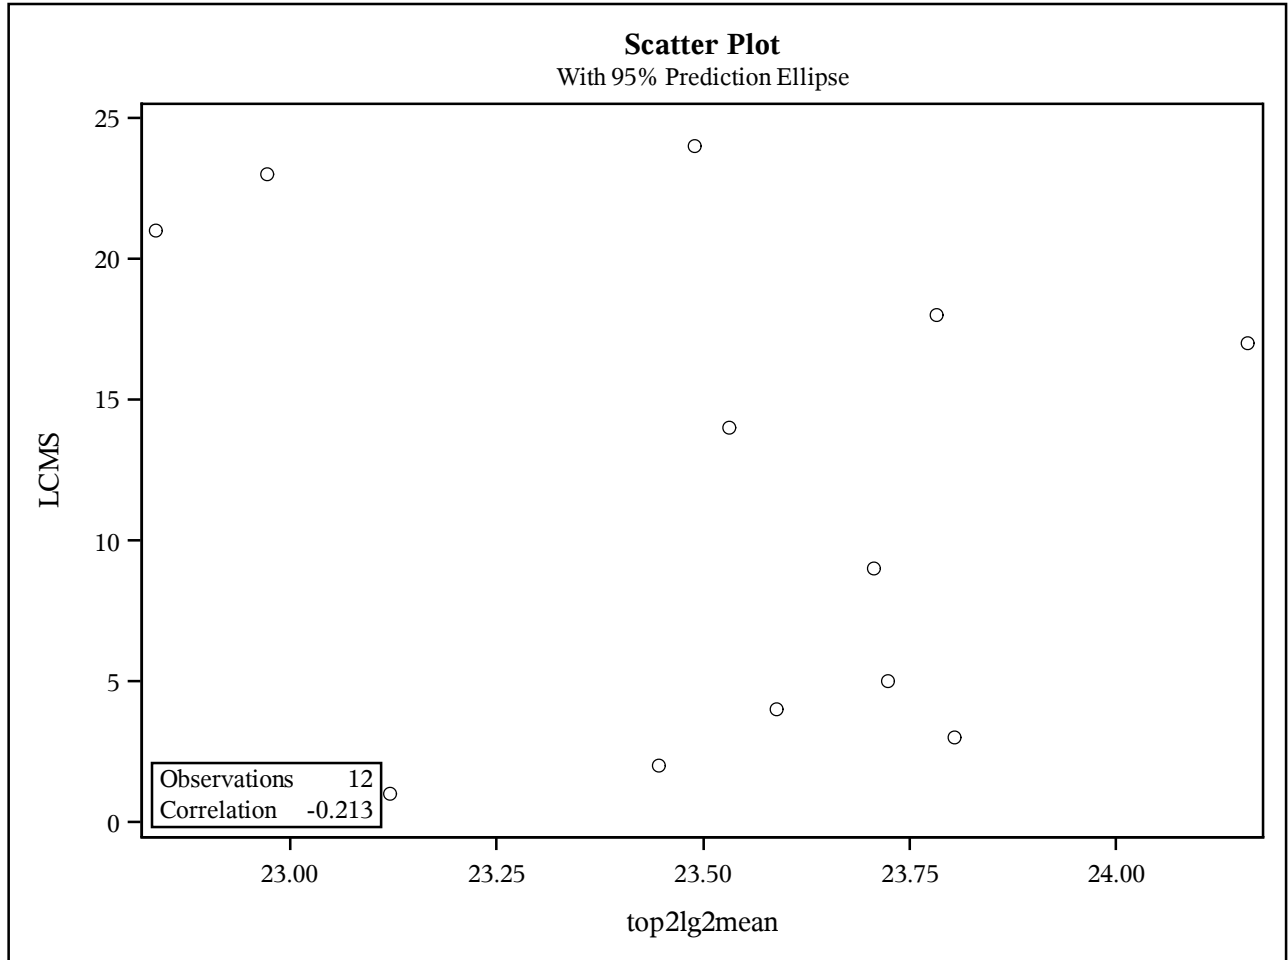

**Correlation C\_pooltop2lg2mean\_tp2 symbol LCMS****The CORR Procedure**

Gene\_Symbol=AGT

2 Variables: top2lg2mean LCMS

| Simple Statistics |    |          |         |           |          |          |
|-------------------|----|----------|---------|-----------|----------|----------|
| Variable          | N  | Mean     | Std Dev | Sum       | Minimum  | Maximum  |
| top2lg2mean       | 12 | 24.82819 | 0.43733 | 297.93831 | 23.95626 | 25.72056 |
| LCMS              | 12 | 11.75000 | 8.70867 | 141.00000 | 1.00000  | 24.00000 |

| Pearson Correlation Coefficients, N = 12<br>Prob >  r  under H0: Rho=0 |                    |                    |
|------------------------------------------------------------------------|--------------------|--------------------|
|                                                                        | top2lg2mean        | LCMS               |
| top2lg2mean                                                            | 1.00000            | -0.26110<br>0.4124 |
| LCMS                                                                   | -0.26110<br>0.4124 | 1.00000            |

**Pearson Correlation Statistics (Fisher's z Transformation)**

| Variable    | With Variable | N  | Sample Correlation | Fisher's z | Bias Adjustment | Correlation Estimate | 95% Confidence Limits |          | p Value for H0:Rho=0 |
|-------------|---------------|----|--------------------|------------|-----------------|----------------------|-----------------------|----------|----------------------|
| top2lg2mean | LCMS          | 12 | -0.26110           | -0.26729   | -0.01187        | -0.25001             | -0.720529             | 0.378149 | 0.4226               |

**Correlation C\_pooltop2lg2mean\_tp2 symbol LCMS**

**The CORR Procedure**

Gene\_Symbol=AGT

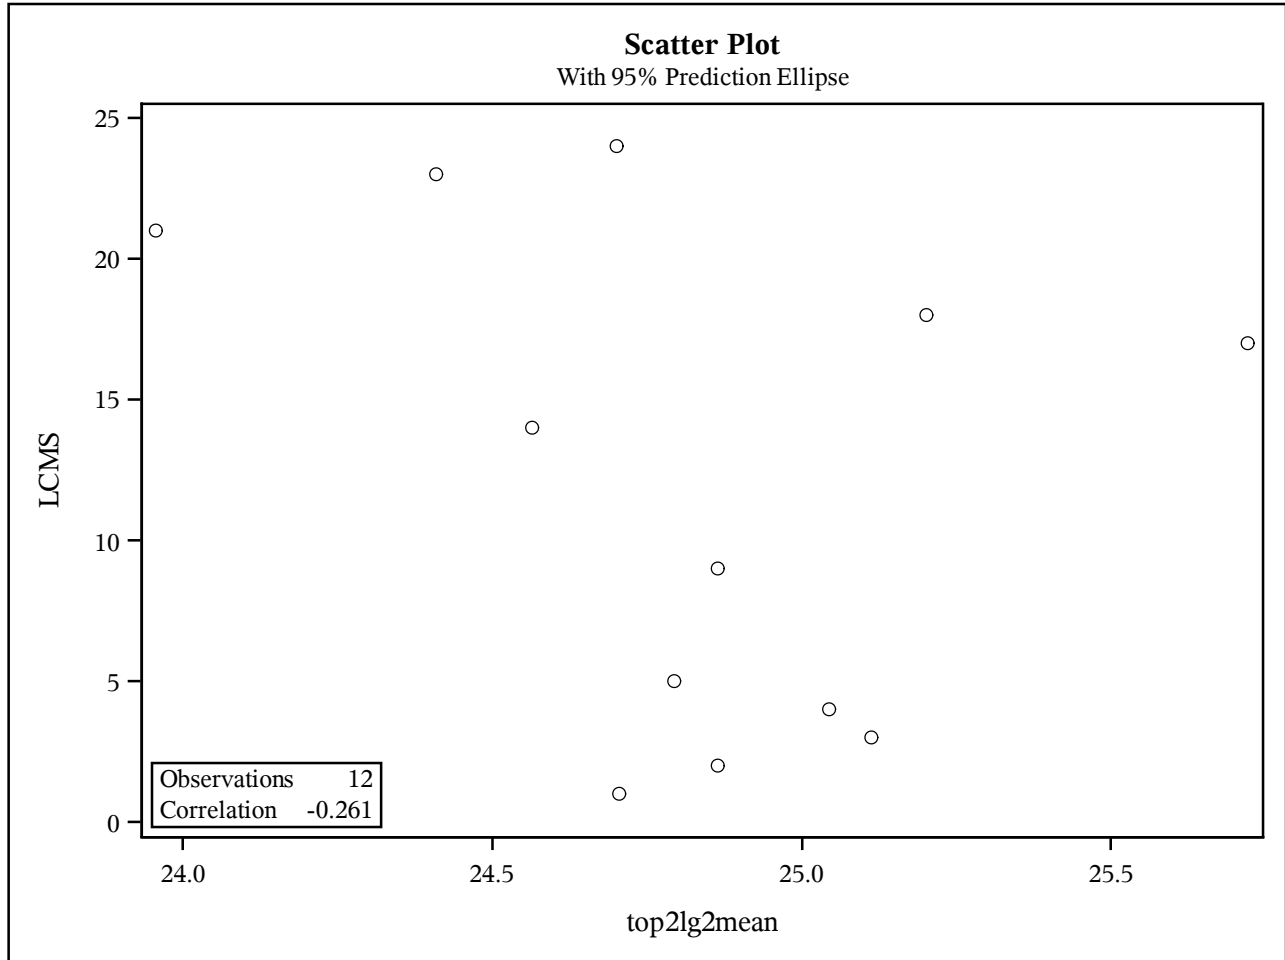

**Correlation C\_pooltop2lg2mean\_tp2 symbol LCMS****The CORR Procedure**

Gene\_Symbol=AHSG

2 Variables: top2lg2mean LCMS

| Simple Statistics |    |          |         |           |          |          |
|-------------------|----|----------|---------|-----------|----------|----------|
| Variable          | N  | Mean     | Std Dev | Sum       | Minimum  | Maximum  |
| top2lg2mean       | 12 | 22.54882 | 0.14816 | 270.58587 | 22.32566 | 22.82825 |
| LCMS              | 12 | 11.75000 | 8.70867 | 141.00000 | 1.00000  | 24.00000 |

| Pearson Correlation Coefficients, N = 12<br>Prob >  r  under H0: Rho=0 |                   |                   |
|------------------------------------------------------------------------|-------------------|-------------------|
|                                                                        | top2lg2mean       | LCMS              |
| top2lg2mean                                                            | 1.00000           | 0.55293<br>0.0622 |
| LCMS                                                                   | 0.55293<br>0.0622 | 1.00000           |

| Pearson Correlation Statistics (Fisher's z Transformation) |               |    |                    |            |                 |                      |                       |          |                      |
|------------------------------------------------------------|---------------|----|--------------------|------------|-----------------|----------------------|-----------------------|----------|----------------------|
| Variable                                                   | With Variable | N  | Sample Correlation | Fisher's z | Bias Adjustment | Correlation Estimate | 95% Confidence Limits |          | p Value for H0:Rho=0 |
| top2lg2mean                                                | LCMS          | 12 | 0.55293            | 0.62260    | 0.02513         | 0.53524              | -0.055800             | 0.848504 | 0.0618               |

**Correlation C\_pooltop2lg2mean\_tp2 symbol LCMS**

**The CORR Procedure**

Gene\_Symbol=AHSG

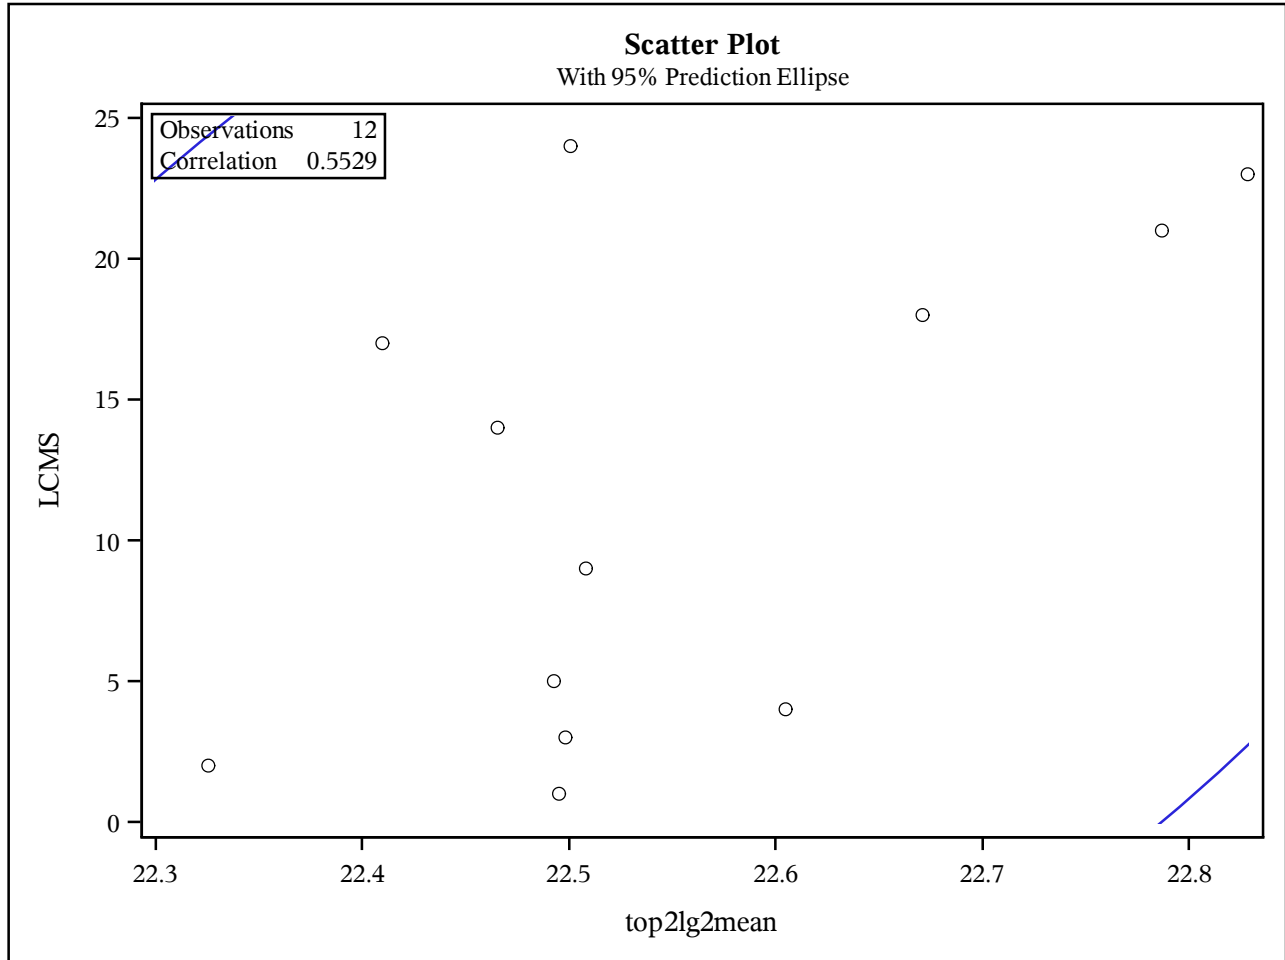



**Correlation C\_pooltop2lg2mean\_tp2 symbol LCMS****The CORR Procedure**

Gene\_Symbol=APLP1

2 Variables: top2lg2mean LCMS

| Simple Statistics |    |          |         |           |          |          |
|-------------------|----|----------|---------|-----------|----------|----------|
| Variable          | N  | Mean     | Std Dev | Sum       | Minimum  | Maximum  |
| top2lg2mean       | 12 | 23.16222 | 0.29325 | 277.94665 | 22.65640 | 23.64982 |
| LCMS              | 12 | 11.75000 | 8.70867 | 141.00000 | 1.00000  | 24.00000 |

| Pearson Correlation Coefficients, N = 12<br>Prob >  r  under H0: Rho=0 |                   |                   |
|------------------------------------------------------------------------|-------------------|-------------------|
|                                                                        | top2lg2mean       | LCMS              |
| top2lg2mean                                                            | 1.00000           | 0.30084<br>0.3420 |
| LCMS                                                                   | 0.30084<br>0.3420 | 1.00000           |

**Pearson Correlation Statistics (Fisher's z Transformation)**

| Variable    | With Variable | N  | Sample Correlation | Fisher's z | Bias Adjustment | Correlation Estimate | 95% Confidence Limits |          | p Value for H0:Rho=0 |
|-------------|---------------|----|--------------------|------------|-----------------|----------------------|-----------------------|----------|----------------------|
| top2lg2mean | LCMS          | 12 | 0.30084            | 0.31045    | 0.01367         | 0.28836              | -0.342171             | 0.739825 | 0.3517               |

**Correlation C\_pooltop2lg2mean\_tp2 symbol LCMS**

**The CORR Procedure**

Gene\_Symbol=APLP1

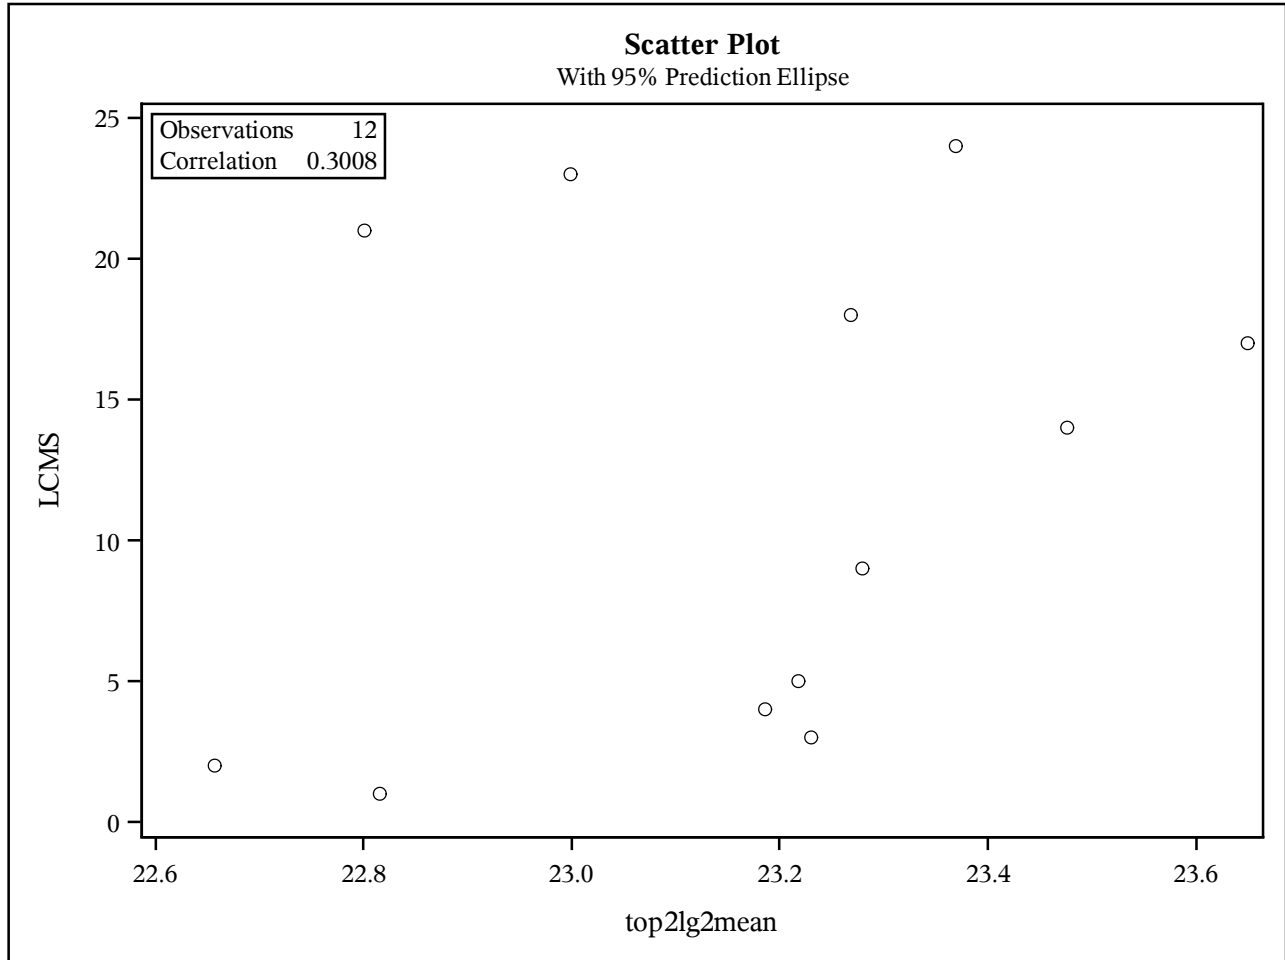

**Correlation C\_pooltop2lg2mean\_tp2 symbol LCMS****The CORR Procedure**

Gene\_Symbol=APOA1

2 Variables: top2lg2mean LCMS

| Simple Statistics |    |          |         |           |          |          |
|-------------------|----|----------|---------|-----------|----------|----------|
| Variable          | N  | Mean     | Std Dev | Sum       | Minimum  | Maximum  |
| top2lg2mean       | 12 | 25.58229 | 0.22491 | 306.98745 | 25.28807 | 25.94263 |
| LCMS              | 12 | 11.75000 | 8.70867 | 141.00000 | 1.00000  | 24.00000 |

| Pearson Correlation Coefficients, N = 12<br>Prob >  r  under H0: Rho=0 |                   |                   |
|------------------------------------------------------------------------|-------------------|-------------------|
|                                                                        | top2lg2mean       | LCMS              |
| top2lg2mean                                                            | 1.00000           | 0.83370<br>0.0008 |
| LCMS                                                                   | 0.83370<br>0.0008 | 1.00000           |

**Pearson Correlation Statistics (Fisher's z Transformation)**

| Variable    | With Variable | N  | Sample Correlation | Fisher's z | Bias Adjustment | Correlation Estimate | 95% Confidence Limits |          | p Value for H0:Rho=0 |
|-------------|---------------|----|--------------------|------------|-----------------|----------------------|-----------------------|----------|----------------------|
| top2lg2mean | LCMS          | 12 | 0.83370            | 1.20013    | 0.03790         | 0.82177              | 0.469101              | 0.948394 | 0.0003               |

**Correlation C\_pooltop2lg2mean\_tp2 symbol LCMS**

**The CORR Procedure**

Gene\_Symbol=APOA1

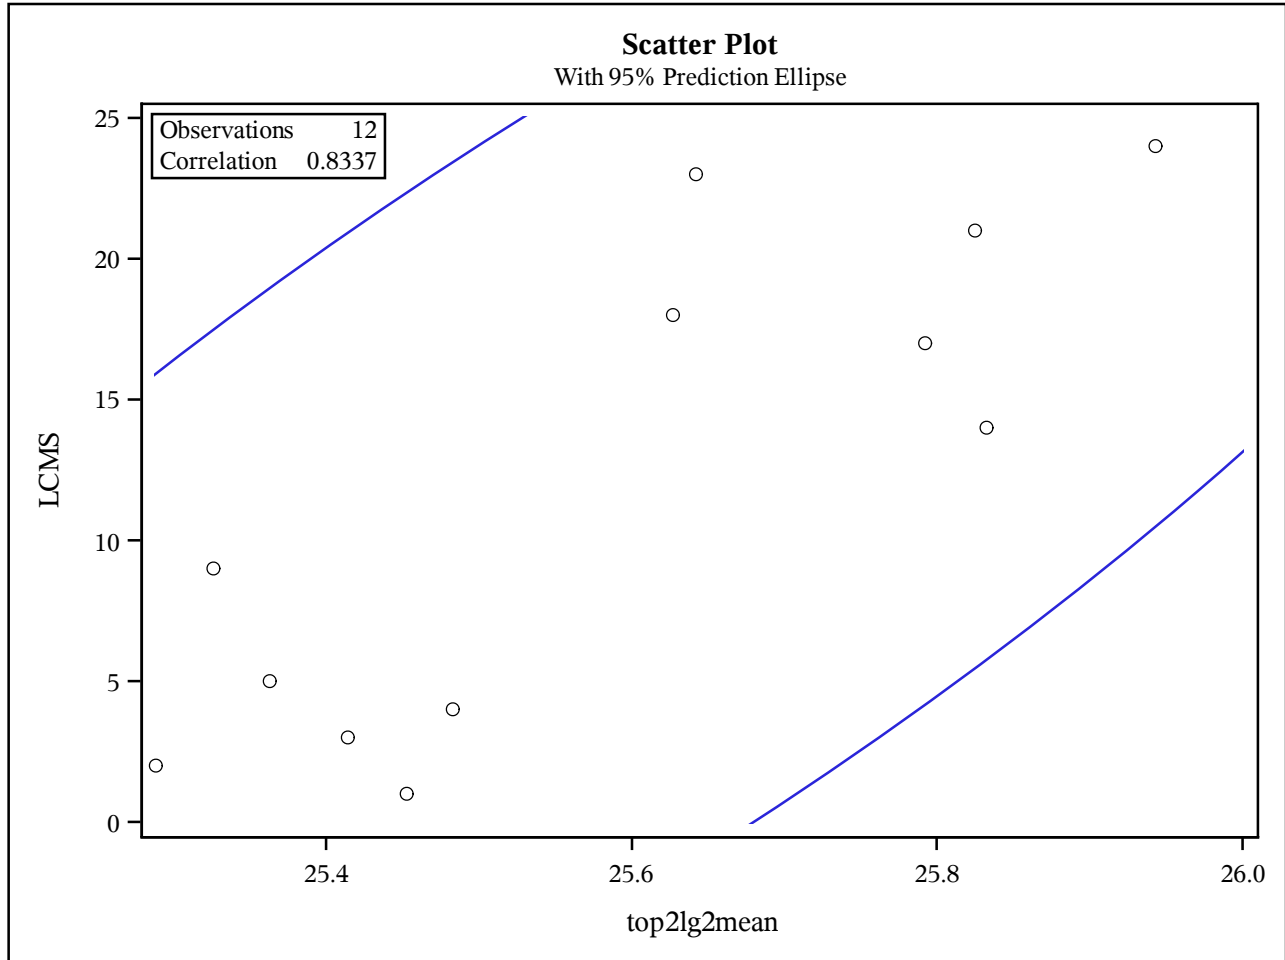

**Correlation C\_pooltop2lg2mean\_tp2 symbol LCMS****The CORR Procedure**

Gene\_Symbol=APOA4

2 Variables: top2lg2mean LCMS

| Simple Statistics |    |          |         |           |          |          |
|-------------------|----|----------|---------|-----------|----------|----------|
| Variable          | N  | Mean     | Std Dev | Sum       | Minimum  | Maximum  |
| top2lg2mean       | 12 | 21.32405 | 0.37275 | 255.88859 | 20.64906 | 21.96869 |
| LCMS              | 12 | 11.75000 | 8.70867 | 141.00000 | 1.00000  | 24.00000 |

| Pearson Correlation Coefficients, N = 12<br>Prob >  r  under H0: Rho=0 |                   |                   |
|------------------------------------------------------------------------|-------------------|-------------------|
|                                                                        | top2lg2mean       | LCMS              |
| top2lg2mean                                                            | 1.00000           | 0.51663<br>0.0855 |
| LCMS                                                                   | 0.51663<br>0.0855 | 1.00000           |

**Pearson Correlation Statistics (Fisher's z Transformation)**

| Variable    | With Variable | N  | Sample Correlation | Fisher's z | Bias Adjustment | Correlation Estimate | 95% Confidence Limits |          | p Value for H0:Rho=0 |
|-------------|---------------|----|--------------------|------------|-----------------|----------------------|-----------------------|----------|----------------------|
| top2lg2mean | LCMS          | 12 | 0.51663            | 0.57174    | 0.02348         | 0.49921              | -0.104683             | 0.834134 | 0.0863               |

# Correlation C\_pooltop2lg2mean\_tp2 symbol LCMS

## The CORR Procedure

Gene\_Symbol=APOA4

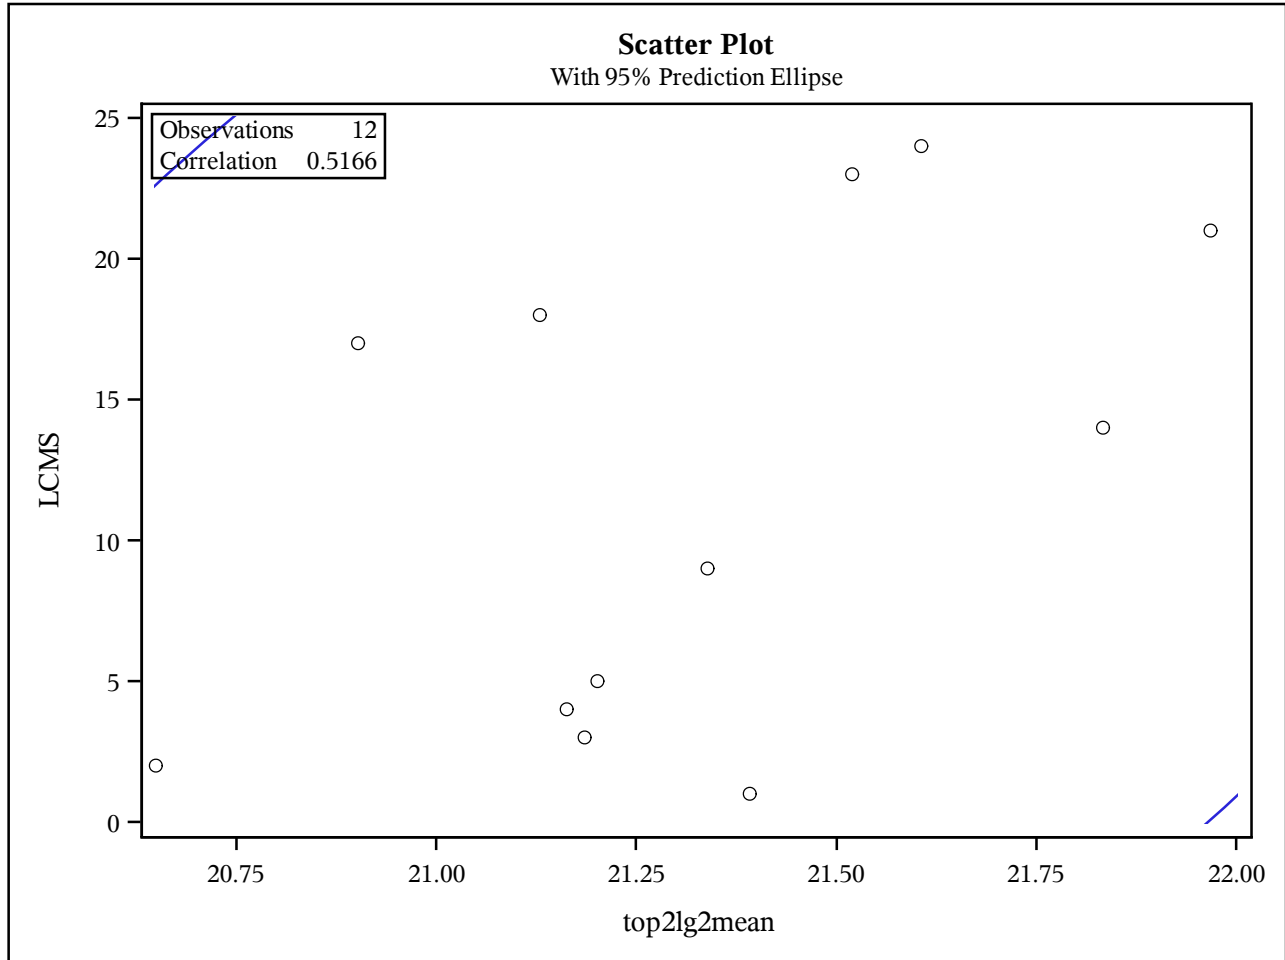

**Correlation C\_pooltop2lg2mean\_tp2 symbol LCMS****The CORR Procedure**

Gene\_Symbol=APOD

2 Variables: top2lg2mean LCMS

| Simple Statistics |    |          |         |           |          |          |
|-------------------|----|----------|---------|-----------|----------|----------|
| Variable          | N  | Mean     | Std Dev | Sum       | Minimum  | Maximum  |
| top2lg2mean       | 12 | 21.87122 | 0.34024 | 262.45467 | 21.17123 | 22.36336 |
| LCMS              | 12 | 11.75000 | 8.70867 | 141.00000 | 1.00000  | 24.00000 |

| Pearson Correlation Coefficients, N = 12<br>Prob >  r  under H0: Rho=0 |                    |                    |
|------------------------------------------------------------------------|--------------------|--------------------|
|                                                                        | top2lg2mean        | LCMS               |
| top2lg2mean                                                            | 1.00000            | -0.32955<br>0.2955 |
| LCMS                                                                   | -0.32955<br>0.2955 | 1.00000            |

**Pearson Correlation Statistics (Fisher's z Transformation)**

| Variable    | With Variable | N  | Sample Correlation | Fisher's z | Bias Adjustment | Correlation Estimate | 95% Confidence Limits |          | p Value for H0:Rho=0 |
|-------------|---------------|----|--------------------|------------|-----------------|----------------------|-----------------------|----------|----------------------|
| top2lg2mean | LCMS          | 12 | -0.32955           | -0.34233   | -0.01498        | -0.31613             | -0.753355             | 0.314899 | 0.3044               |

**Correlation C\_pooltop2lg2mean\_tp2 symbol LCMS****The CORR Procedure**

Gene\_Symbol=APOD

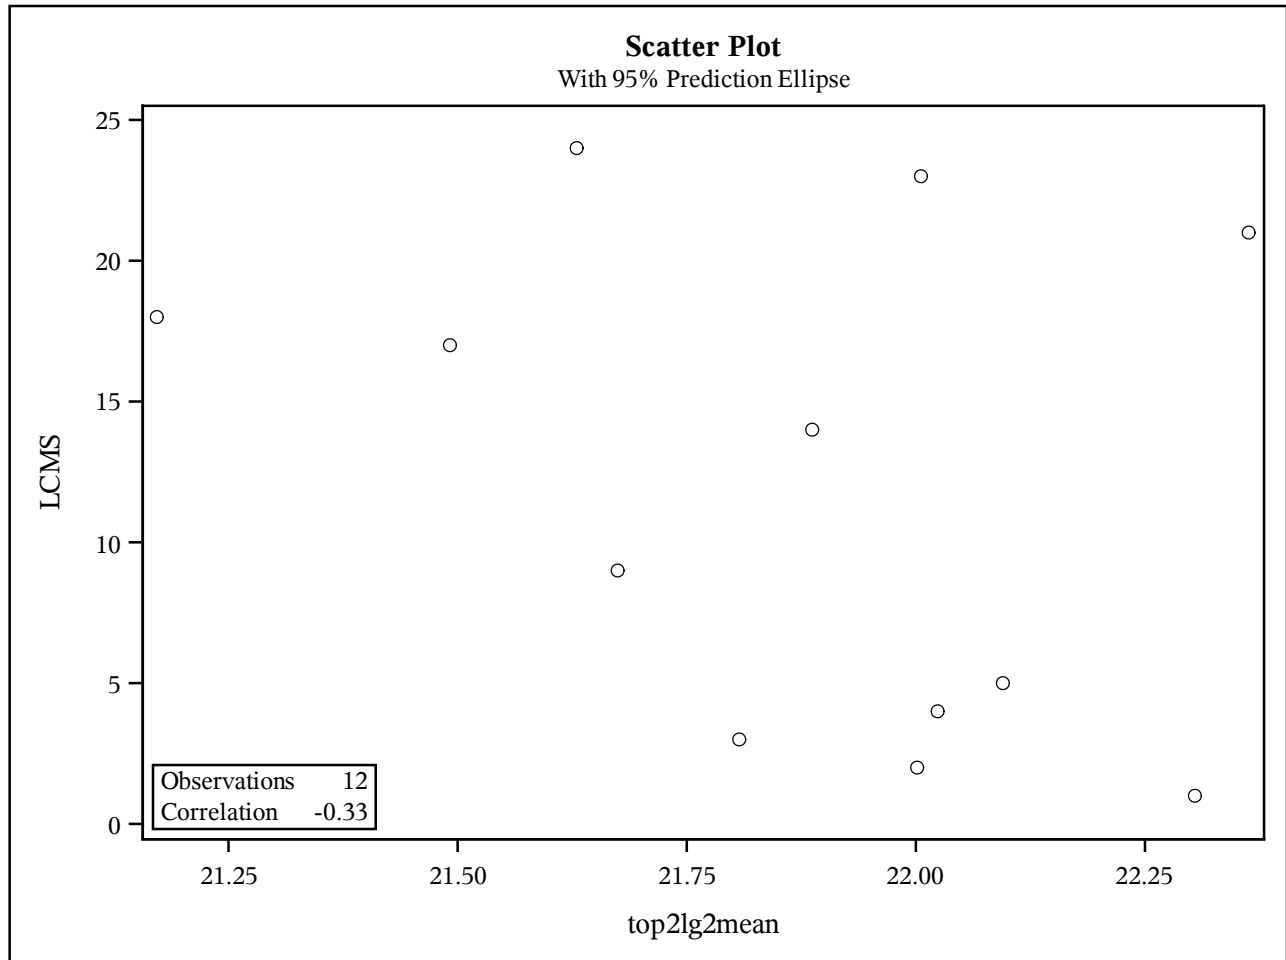



**Correlation C\_pooltop2lg2mean\_tp2 symbol LCMS****The CORR Procedure**

Gene\_Symbol=APOE

2 Variables: top2lg2mean LCMS

| Simple Statistics |    |          |         |           |          |          |
|-------------------|----|----------|---------|-----------|----------|----------|
| Variable          | N  | Mean     | Std Dev | Sum       | Minimum  | Maximum  |
| top2lg2mean       | 12 | 23.90888 | 0.30086 | 286.90650 | 23.33682 | 24.38528 |
| LCMS              | 12 | 11.75000 | 8.70867 | 141.00000 | 1.00000  | 24.00000 |

| Pearson Correlation Coefficients, N = 12<br>Prob >  r  under H0: Rho=0 |                    |                    |
|------------------------------------------------------------------------|--------------------|--------------------|
|                                                                        | top2lg2mean        | LCMS               |
| top2lg2mean                                                            | 1.00000            | -0.07219<br>0.8236 |
| LCMS                                                                   | -0.07219<br>0.8236 | 1.00000            |

| Pearson Correlation Statistics (Fisher's z Transformation) |               |    |                    |            |                 |                      |                       |          |                      |
|------------------------------------------------------------|---------------|----|--------------------|------------|-----------------|----------------------|-----------------------|----------|----------------------|
| Variable                                                   | With Variable | N  | Sample Correlation | Fisher's z | Bias Adjustment | Correlation Estimate | 95% Confidence Limits |          | p Value for H0:Rho=0 |
| top2lg2mean                                                | LCMS          | 12 | -0.07219           | -0.07232   | -0.00328        | -0.06893             | -0.618367             | 0.525774 | 0.8282               |

**Correlation C\_pooltop2lg2mean\_tp2 symbol LCMS**

**The CORR Procedure**

Gene\_Symbol=APOE

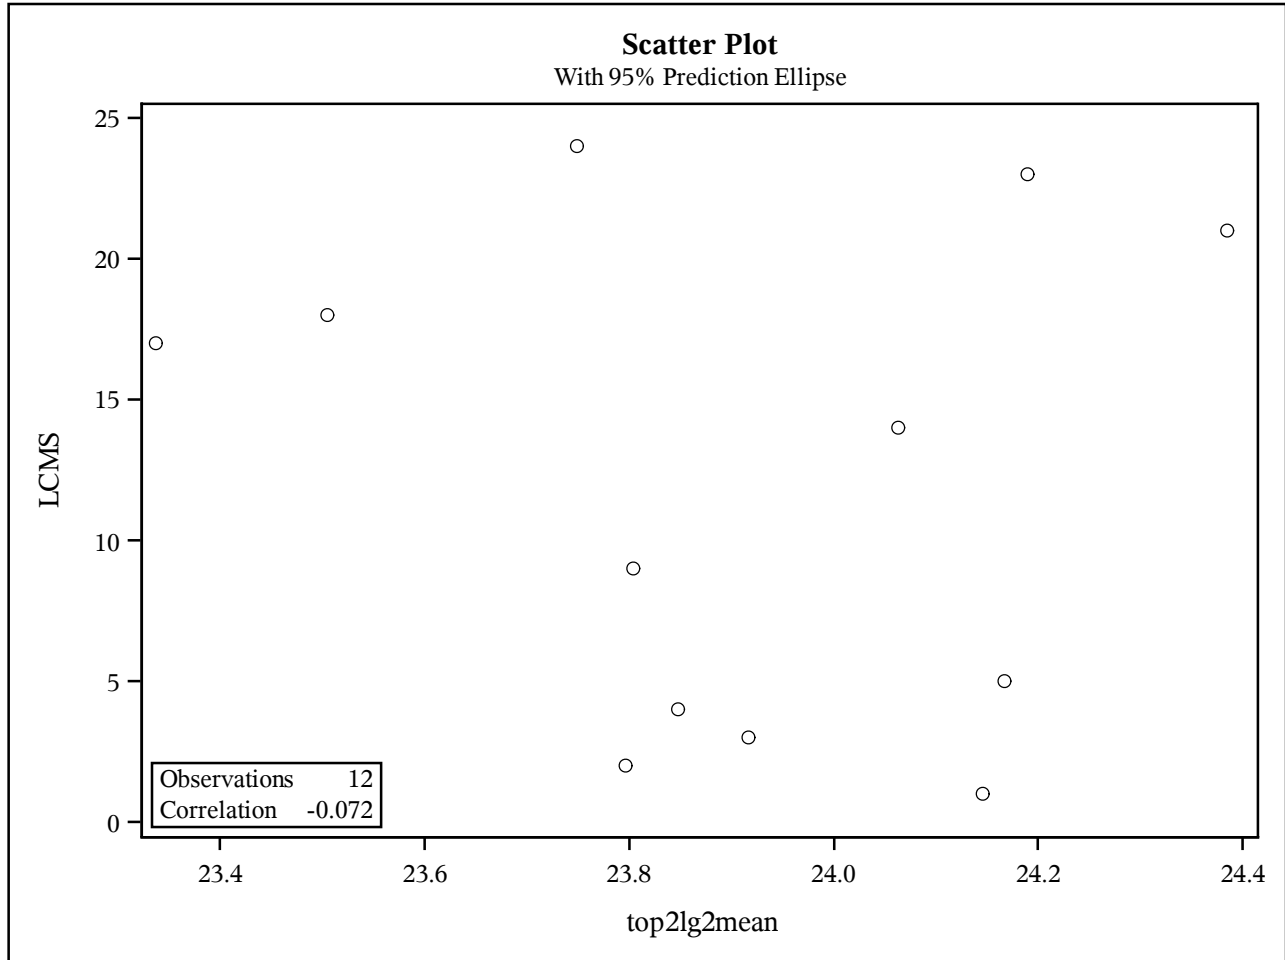

**Correlation C\_pooltop2lg2mean\_tp2 symbol LCMS****The CORR Procedure**

Gene\_Symbol=APOH

2 Variables: top2lg2mean LCMS

| Simple Statistics |    |          |         |           |          |          |
|-------------------|----|----------|---------|-----------|----------|----------|
| Variable          | N  | Mean     | Std Dev | Sum       | Minimum  | Maximum  |
| top2lg2mean       | 12 | 22.29174 | 0.23615 | 267.50086 | 21.90547 | 22.59521 |
| LCMS              | 12 | 11.75000 | 8.70867 | 141.00000 | 1.00000  | 24.00000 |

| Pearson Correlation Coefficients, N = 12<br>Prob >  r  under H0: Rho=0 |                    |                    |
|------------------------------------------------------------------------|--------------------|--------------------|
|                                                                        | top2lg2mean        | LCMS               |
| top2lg2mean                                                            | 1.00000            | -0.40130<br>0.1960 |
| LCMS                                                                   | -0.40130<br>0.1960 | 1.00000            |

| Pearson Correlation Statistics (Fisher's z Transformation) |               |    |                    |            |                 |                      |                       |          |                      |
|------------------------------------------------------------|---------------|----|--------------------|------------|-----------------|----------------------|-----------------------|----------|----------------------|
| Variable                                                   | With Variable | N  | Sample Correlation | Fisher's z | Bias Adjustment | Correlation Estimate | 95% Confidence Limits |          | p Value for H0:Rho=0 |
| top2lg2mean                                                | LCMS          | 12 | -0.40130           | -0.42519   | -0.01824        | -0.38588             | -0.785769             | 0.241501 | 0.2021               |

**Correlation C\_pooltop2lg2mean\_tp2 symbol LCMS**

**The CORR Procedure**

Gene\_Symbol=APOH

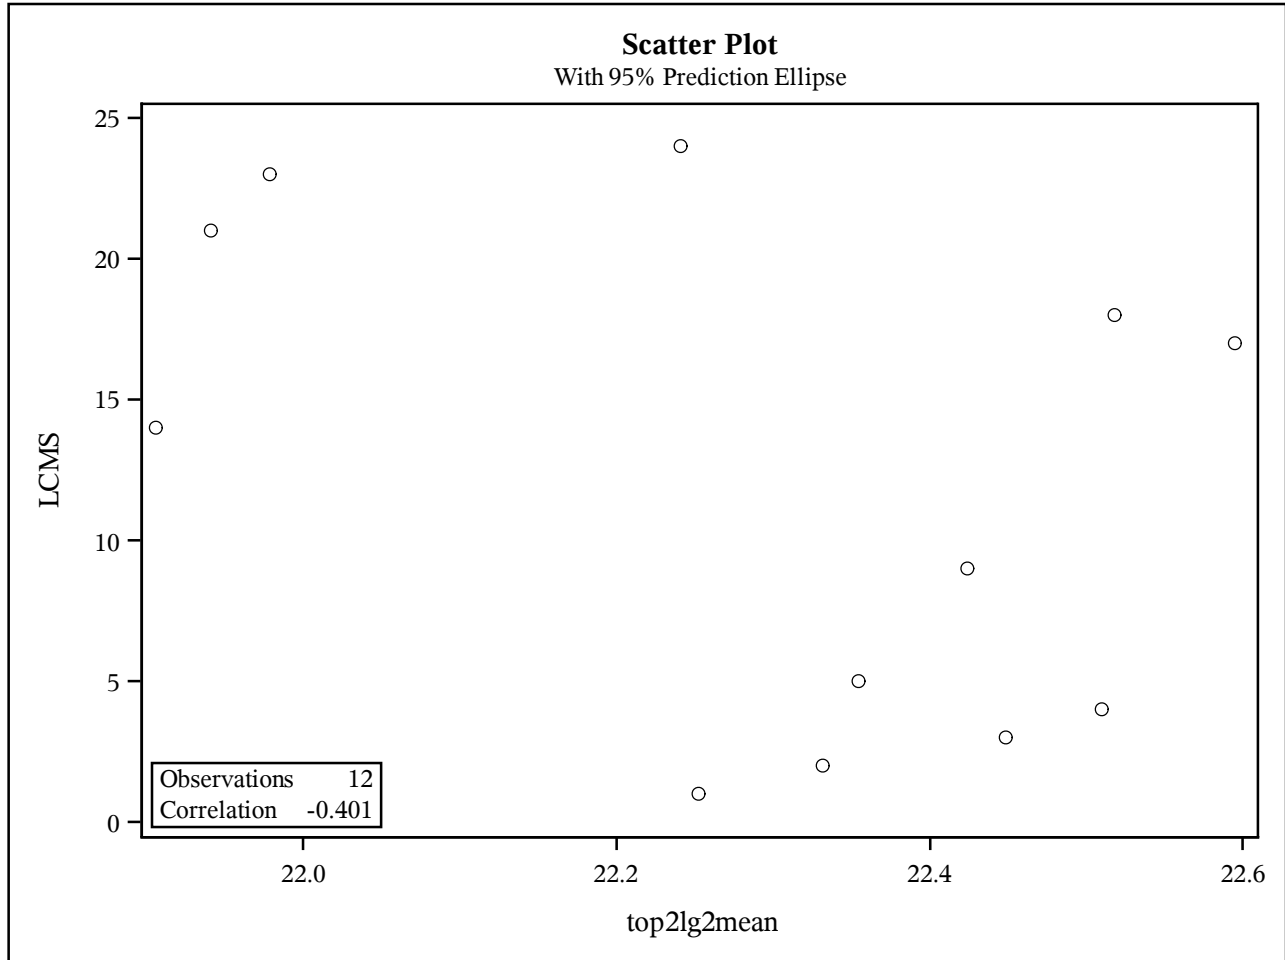

**Correlation C\_pooltop2lg2mean\_tp2 symbol LCMS****The CORR Procedure**

Gene\_Symbol=APP

2 Variables: top2lg2mean LCMS

| Simple Statistics |    |          |         |           |          |          |
|-------------------|----|----------|---------|-----------|----------|----------|
| Variable          | N  | Mean     | Std Dev | Sum       | Minimum  | Maximum  |
| top2lg2mean       | 12 | 22.01715 | 0.31782 | 264.20575 | 21.17932 | 22.35052 |
| LCMS              | 12 | 11.75000 | 8.70867 | 141.00000 | 1.00000  | 24.00000 |

| Pearson Correlation Coefficients, N = 12<br>Prob >  r  under H0: Rho=0 |                   |                   |
|------------------------------------------------------------------------|-------------------|-------------------|
|                                                                        | top2lg2mean       | LCMS              |
| top2lg2mean                                                            | 1.00000           | 0.60688<br>0.0364 |
| LCMS                                                                   | 0.60688<br>0.0364 | 1.00000           |

**Pearson Correlation Statistics (Fisher's z Transformation)**

| Variable    | With Variable | N  | Sample Correlation | Fisher's z | Bias Adjustment | Correlation Estimate | 95% Confidence Limits |          | p Value for H0:Rho=0 |
|-------------|---------------|----|--------------------|------------|-----------------|----------------------|-----------------------|----------|----------------------|
| top2lg2mean | LCMS          | 12 | 0.60688            | 0.70396    | 0.02759         | 0.58916              | 0.023049              | 0.869175 | 0.0347               |

**Correlation C\_pooltop2lg2mean\_tp2 symbol LCMS****The CORR Procedure**

Gene\_Symbol=APP

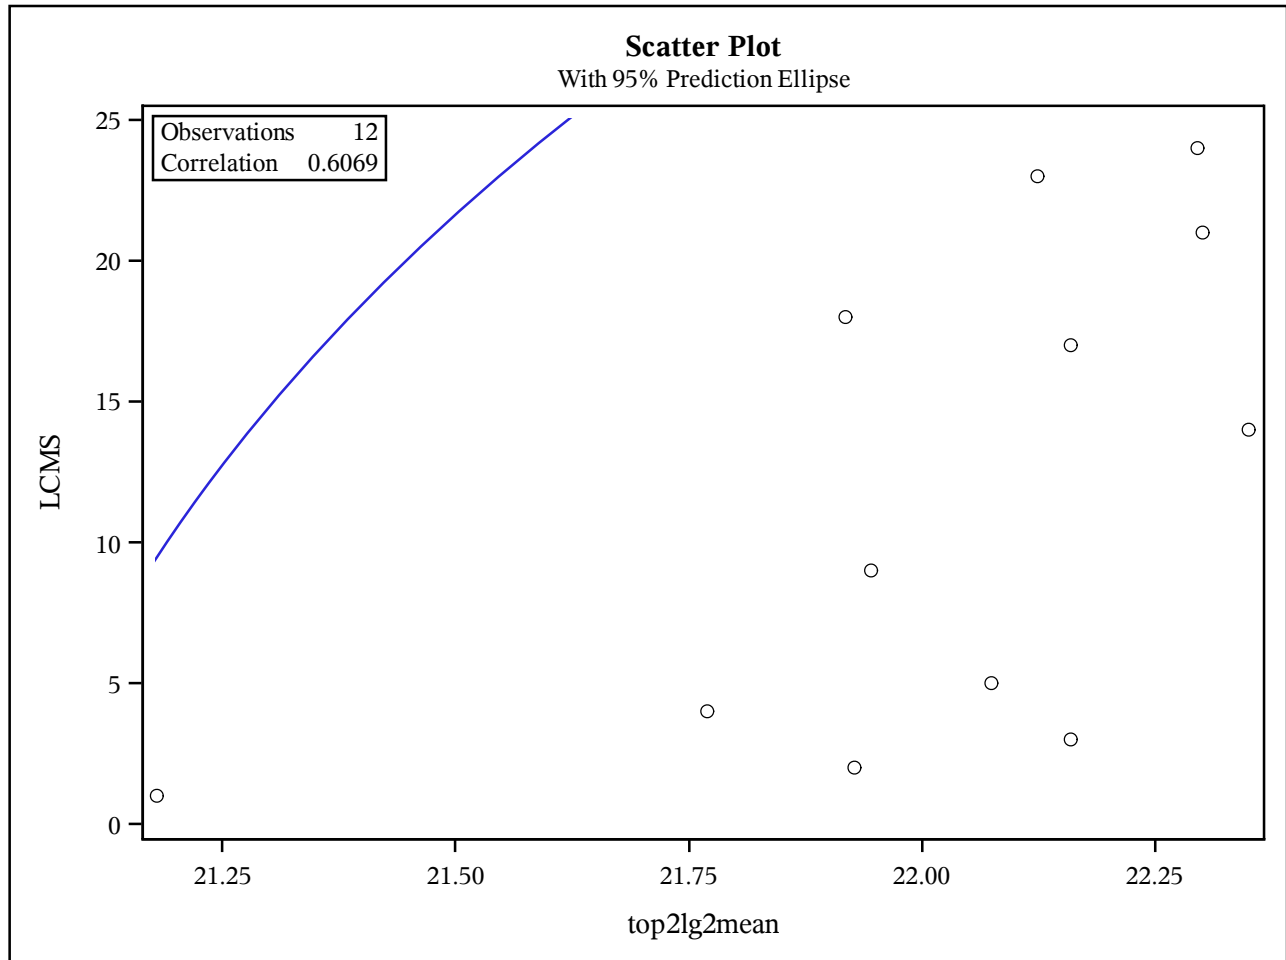

**Correlation C\_pooltop2lg2mean\_tp2 symbol LCMS****The CORR Procedure**

Gene\_Symbol=AZGP1

2 Variables: top2lg2mean LCMS

| Simple Statistics |    |          |         |           |          |          |
|-------------------|----|----------|---------|-----------|----------|----------|
| Variable          | N  | Mean     | Std Dev | Sum       | Minimum  | Maximum  |
| top2lg2mean       | 12 | 21.82737 | 0.10820 | 261.92846 | 21.65513 | 22.02868 |
| LCMS              | 12 | 11.75000 | 8.70867 | 141.00000 | 1.00000  | 24.00000 |

| Pearson Correlation Coefficients, N = 12<br>Prob >  r  under H0: Rho=0 |                   |                   |
|------------------------------------------------------------------------|-------------------|-------------------|
|                                                                        | top2lg2mean       | LCMS              |
| top2lg2mean                                                            | 1.00000           | 0.22790<br>0.4762 |
| LCMS                                                                   | 0.22790<br>0.4762 | 1.00000           |

**Pearson Correlation Statistics (Fisher's z Transformation)**

| Variable    | With Variable | N  | Sample Correlation | Fisher's z | Bias Adjustment | Correlation Estimate | 95% Confidence Limits |          | p Value for H0:Rho=0 |
|-------------|---------------|----|--------------------|------------|-----------------|----------------------|-----------------------|----------|----------------------|
| top2lg2mean | LCMS          | 12 | 0.22790            | 0.23197    | 0.01036         | 0.21806              | -0.406746             | 0.703874 | 0.4865               |

**Correlation C\_pooltop2lg2mean\_tp2 symbol LCMS**

**The CORR Procedure**

Gene\_Symbol=AZGP1

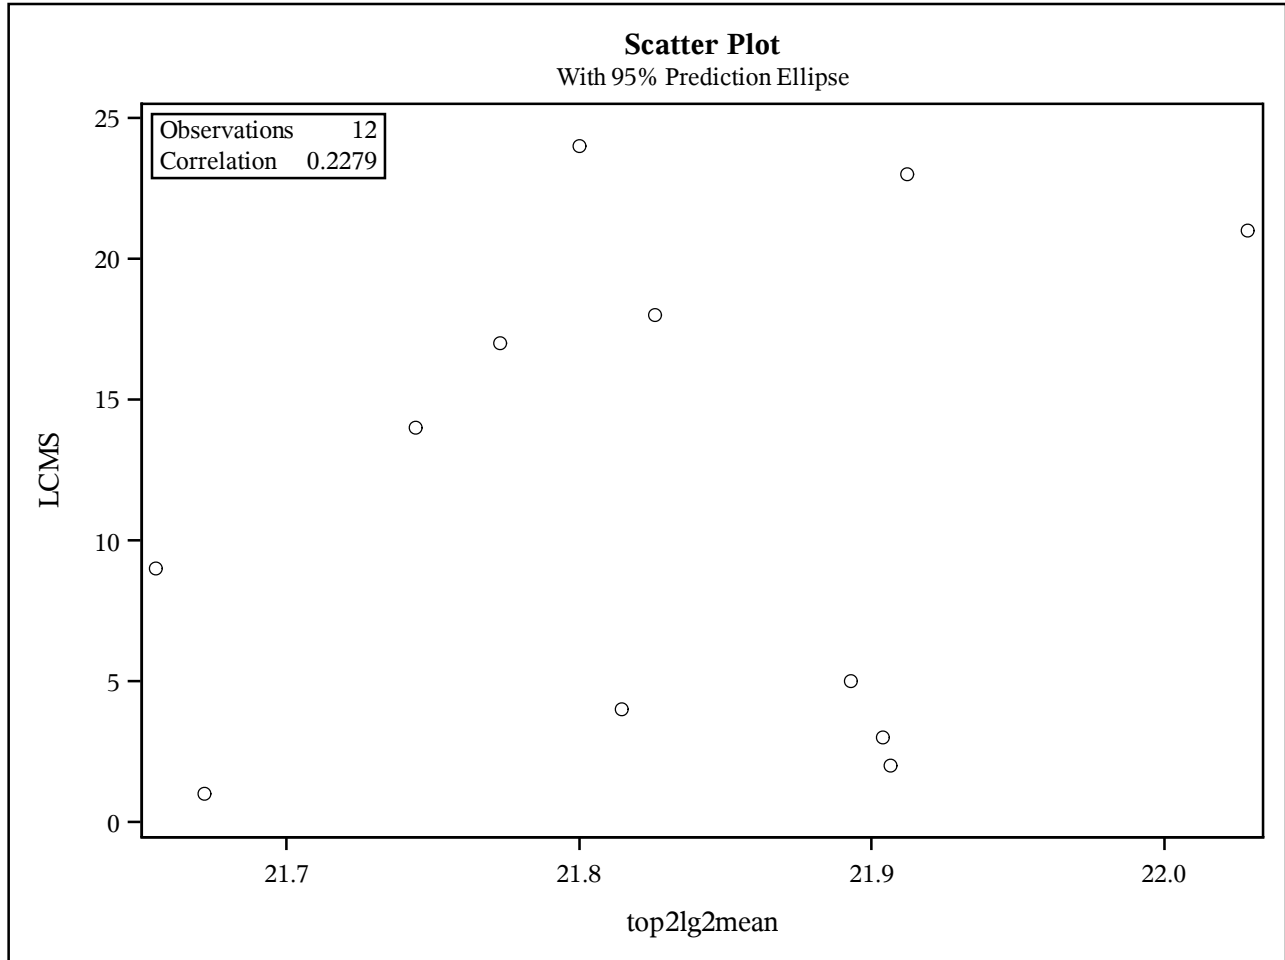



**Correlation C\_pooltop2lg2mean\_tp2 symbol LCMS****The CORR Procedure**

Gene\_Symbol=B2M

2 Variables: top2lg2mean LCMS

| Simple Statistics |    |          |         |           |          |          |
|-------------------|----|----------|---------|-----------|----------|----------|
| Variable          | N  | Mean     | Std Dev | Sum       | Minimum  | Maximum  |
| top2lg2mean       | 12 | 23.15555 | 0.71637 | 277.86666 | 22.13271 | 24.50394 |
| LCMS              | 12 | 11.75000 | 8.70867 | 141.00000 | 1.00000  | 24.00000 |

| Pearson Correlation Coefficients, N = 12<br>Prob >  r  under H0: Rho=0 |                    |                    |
|------------------------------------------------------------------------|--------------------|--------------------|
|                                                                        | top2lg2mean        | LCMS               |
| top2lg2mean                                                            | 1.00000            | -0.83141<br>0.0008 |
| LCMS                                                                   | -0.83141<br>0.0008 | 1.00000            |

| Pearson Correlation Statistics (Fisher's z Transformation) |               |    |                    |            |                 |                      |                       |           |                      |
|------------------------------------------------------------|---------------|----|--------------------|------------|-----------------|----------------------|-----------------------|-----------|----------------------|
| Variable                                                   | With Variable | N  | Sample Correlation | Fisher's z | Bias Adjustment | Correlation Estimate | 95% Confidence Limits |           | p Value for H0:Rho=0 |
| top2lg2mean                                                | LCMS          | 12 | -0.83141           | -1.19269   | -0.03779        | -0.81937             | -0.947651             | -0.463359 | 0.0003               |

**Correlation C\_pooltop2lg2mean\_tp2 symbol LCMS****The CORR Procedure**

Gene\_Symbol=B2M

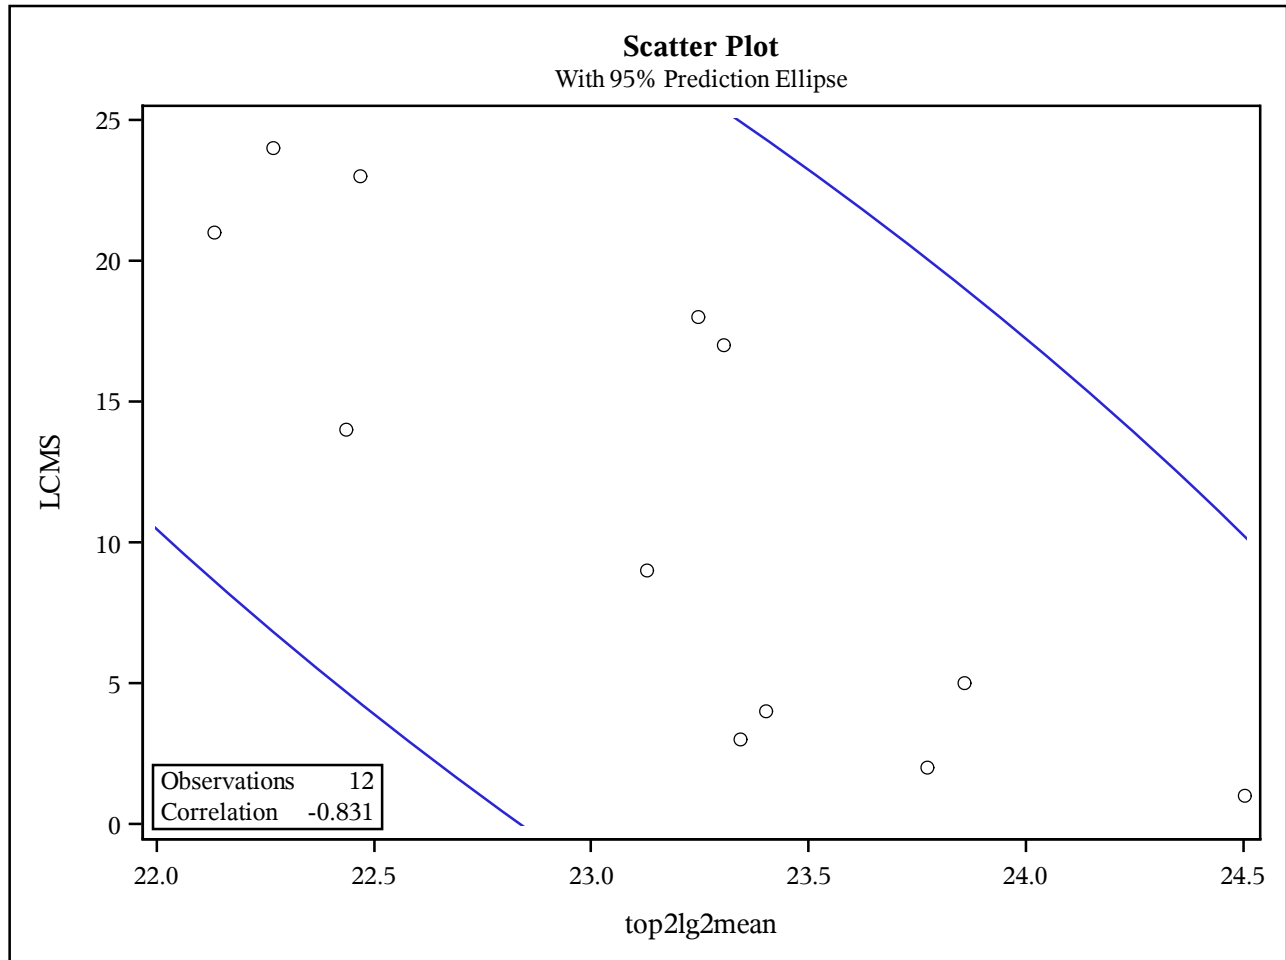

**Correlation C\_pooltop2lg2mean\_tp2 symbol LCMS****The CORR Procedure**

Gene\_Symbol=B3GNT1

2 Variables: top2lg2mean LCMS

| Simple Statistics |    |          |         |           |          |          |
|-------------------|----|----------|---------|-----------|----------|----------|
| Variable          | N  | Mean     | Std Dev | Sum       | Minimum  | Maximum  |
| top2lg2mean       | 12 | 21.33297 | 0.12604 | 255.99567 | 21.16096 | 21.59144 |
| LCMS              | 12 | 11.75000 | 8.70867 | 141.00000 | 1.00000  | 24.00000 |

| Pearson Correlation Coefficients, N = 12<br>Prob >  r  under H0: Rho=0 |                   |                   |
|------------------------------------------------------------------------|-------------------|-------------------|
|                                                                        | top2lg2mean       | LCMS              |
| top2lg2mean                                                            | 1.00000           | 0.42500<br>0.1684 |
| LCMS                                                                   | 0.42500<br>0.1684 | 1.00000           |

| Pearson Correlation Statistics (Fisher's z Transformation) |               |    |                    |            |                 |                      |                       |          |                      |
|------------------------------------------------------------|---------------|----|--------------------|------------|-----------------|----------------------|-----------------------|----------|----------------------|
| Variable                                                   | With Variable | N  | Sample Correlation | Fisher's z | Bias Adjustment | Correlation Estimate | 95% Confidence Limits |          | p Value for H0:Rho=0 |
| top2lg2mean                                                | LCMS          | 12 | 0.42500            | 0.45378    | 0.01932         | 0.40904              | -0.215429             | 0.796068 | 0.1734               |

**Correlation C\_pooltop2lg2mean\_tp2 symbol LCMS**

**The CORR Procedure**

Gene\_Symbol=B3GNT1

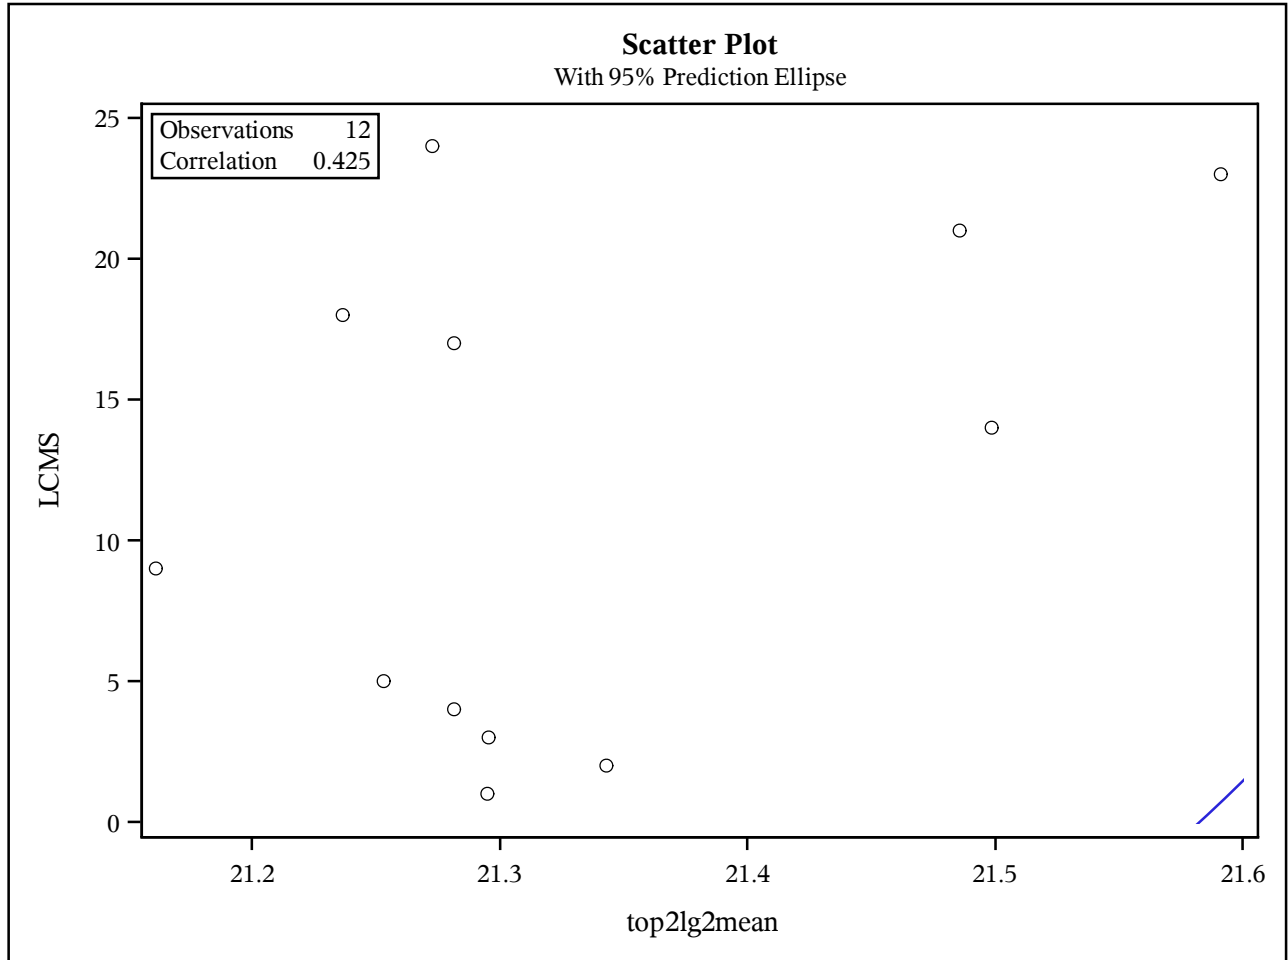

**Correlation C\_pooltop2lg2mean\_tp2 symbol LCMS****The CORR Procedure**

Gene\_Symbol=BCAN

2 Variables: top2lg2mean LCMS

| Simple Statistics |    |          |         |           |          |          |
|-------------------|----|----------|---------|-----------|----------|----------|
| Variable          | N  | Mean     | Std Dev | Sum       | Minimum  | Maximum  |
| top2lg2mean       | 12 | 19.52838 | 0.34793 | 234.34050 | 18.70516 | 20.06111 |
| LCMS              | 12 | 11.75000 | 8.70867 | 141.00000 | 1.00000  | 24.00000 |

| Pearson Correlation Coefficients, N = 12<br>Prob >  r  under H0: Rho=0 |                   |                   |
|------------------------------------------------------------------------|-------------------|-------------------|
|                                                                        | top2lg2mean       | LCMS              |
| top2lg2mean                                                            | 1.00000           | 0.48522<br>0.1098 |
| LCMS                                                                   | 0.48522<br>0.1098 | 1.00000           |

**Pearson Correlation Statistics (Fisher's z Transformation)**

| Variable    | With Variable | N  | Sample Correlation | Fisher's z | Bias Adjustment | Correlation Estimate | 95% Confidence Limits |          | p Value for H0:Rho=0 |
|-------------|---------------|----|--------------------|------------|-----------------|----------------------|-----------------------|----------|----------------------|
| top2lg2mean | LCMS          | 12 | 0.48522            | 0.52979    | 0.02206         | 0.46818              | -0.144564             | 0.821385 | 0.1120               |

**Correlation C\_pooltop2lg2mean\_tp2 symbol LCMS**

**The CORR Procedure**

Gene\_Symbol=BCAN

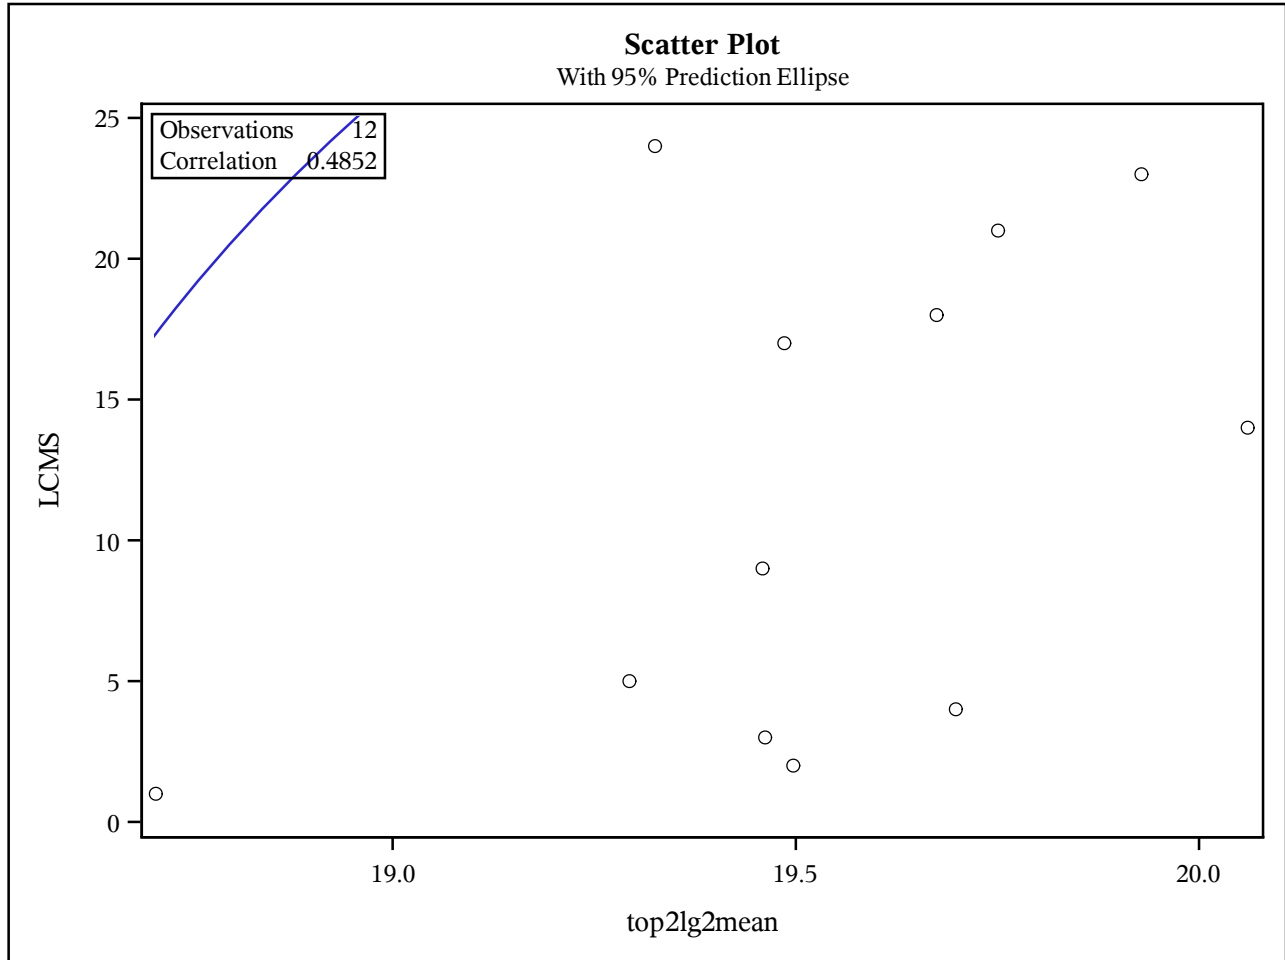

**Correlation C\_pooltop2lg2mean\_tp2 symbol LCMS****The CORR Procedure**

Gene\_Symbol=C1S

2 Variables: top2lg2mean LCMS

| Simple Statistics |    |          |         |           |          |          |
|-------------------|----|----------|---------|-----------|----------|----------|
| Variable          | N  | Mean     | Std Dev | Sum       | Minimum  | Maximum  |
| top2lg2mean       | 12 | 20.39884 | 0.20738 | 244.78613 | 20.08916 | 20.75487 |
| LCMS              | 12 | 11.75000 | 8.70867 | 141.00000 | 1.00000  | 24.00000 |

| Pearson Correlation Coefficients, N = 12<br>Prob >  r  under H0: Rho=0 |                   |                   |
|------------------------------------------------------------------------|-------------------|-------------------|
|                                                                        | top2lg2mean       | LCMS              |
| top2lg2mean                                                            | 1.00000           | 0.69720<br>0.0117 |
| LCMS                                                                   | 0.69720<br>0.0117 | 1.00000           |

**Pearson Correlation Statistics (Fisher's z Transformation)**

| Variable    | With Variable | N  | Sample Correlation | Fisher's z | Bias Adjustment | Correlation Estimate | 95% Confidence Limits |          | p Value for H0:Rho=0 |
|-------------|---------------|----|--------------------|------------|-----------------|----------------------|-----------------------|----------|----------------------|
| top2lg2mean | LCMS          | 12 | 0.69720            | 0.86184    | 0.03169         | 0.68055              | 0.175003              | 0.902115 | 0.0097               |

**Correlation C\_pooltop2lg2mean\_tp2 symbol LCMS**

**The CORR Procedure**

Gene\_Symbol=C1S

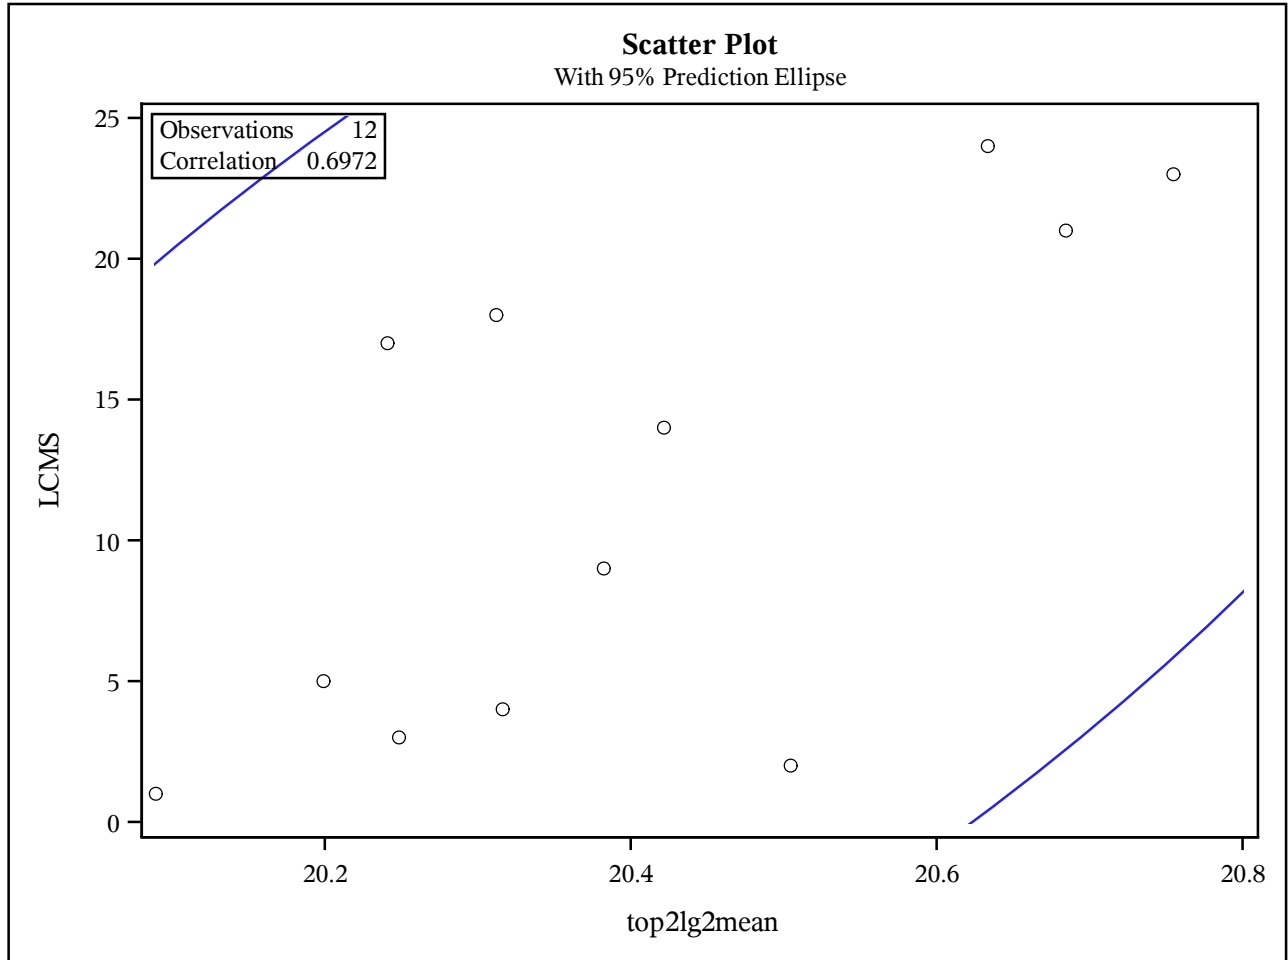



**Correlation C\_pooltop2lg2mean\_tp2 symbol LCMS****The CORR Procedure**

Gene\_Symbol=C3

2 Variables: top2lg2mean LCMS

| Simple Statistics |    |          |         |           |          |          |
|-------------------|----|----------|---------|-----------|----------|----------|
| Variable          | N  | Mean     | Std Dev | Sum       | Minimum  | Maximum  |
| top2lg2mean       | 12 | 23.64879 | 0.24812 | 283.78550 | 23.13520 | 24.02660 |
| LCMS              | 12 | 11.75000 | 8.70867 | 141.00000 | 1.00000  | 24.00000 |

| Pearson Correlation Coefficients, N = 12<br>Prob >  r  under H0: Rho=0 |                   |                   |
|------------------------------------------------------------------------|-------------------|-------------------|
|                                                                        | top2lg2mean       | LCMS              |
| top2lg2mean                                                            | 1.00000           | 0.45801<br>0.1343 |
| LCMS                                                                   | 0.45801<br>0.1343 | 1.00000           |

**Pearson Correlation Statistics (Fisher's z Transformation)**

| Variable    | With Variable | N  | Sample Correlation | Fisher's z | Bias Adjustment | Correlation Estimate | 95% Confidence Limits |          | p Value for H0:Rho=0 |
|-------------|---------------|----|--------------------|------------|-----------------|----------------------|-----------------------|----------|----------------------|
| top2lg2mean | LCMS          | 12 | 0.45801            | 0.49479    | 0.02082         | 0.44140              | -0.177450             | 0.810091 | 0.1377               |

**Correlation C\_pooltop2lg2mean\_tp2 symbol LCMS**

**The CORR Procedure**

Gene\_Symbol=C3

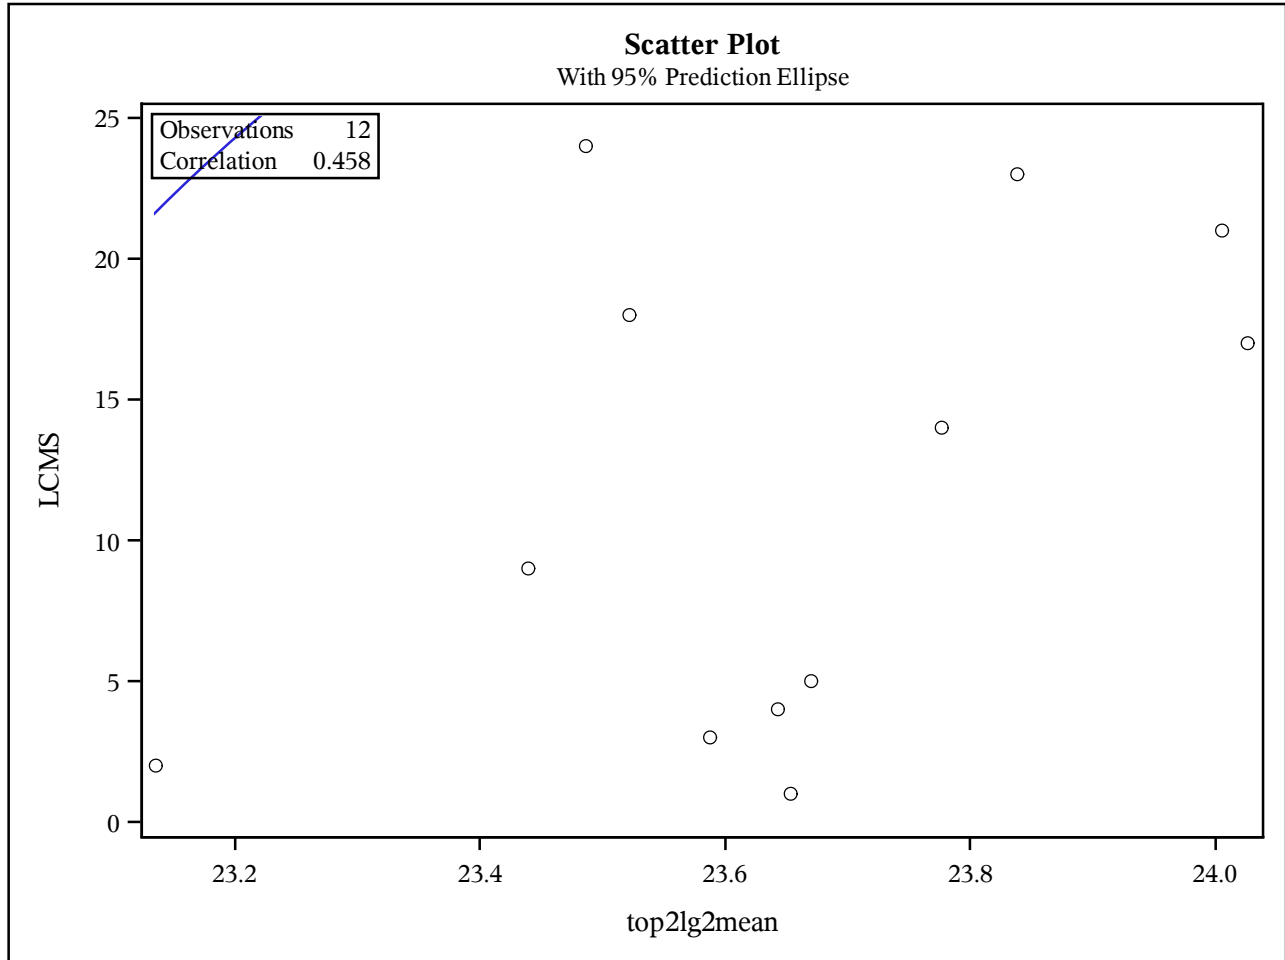

**Correlation C\_pooltop2lg2mean\_tp2 symbol LCMS****The CORR Procedure**

Gene\_Symbol=C4A-C4B

2 Variables: top2lg2mean LCMS

| Simple Statistics |    |          |         |           |          |          |
|-------------------|----|----------|---------|-----------|----------|----------|
| Variable          | N  | Mean     | Std Dev | Sum       | Minimum  | Maximum  |
| top2lg2mean       | 12 | 23.25294 | 0.43429 | 279.03527 | 22.17556 | 23.98024 |
| LCMS              | 12 | 11.75000 | 8.70867 | 141.00000 | 1.00000  | 24.00000 |

| Pearson Correlation Coefficients, N = 12<br>Prob >  r  under H0: Rho=0 |                   |                   |
|------------------------------------------------------------------------|-------------------|-------------------|
|                                                                        | top2lg2mean       | LCMS              |
| top2lg2mean                                                            | 1.00000           | 0.61056<br>0.0350 |
| LCMS                                                                   | 0.61056<br>0.0350 | 1.00000           |

**Pearson Correlation Statistics (Fisher's z Transformation)**

| Variable    | With Variable | N  | Sample Correlation | Fisher's z | Bias Adjustment | Correlation Estimate | 95% Confidence Limits |          | p Value for H0:Rho=0 |
|-------------|---------------|----|--------------------|------------|-----------------|----------------------|-----------------------|----------|----------------------|
| top2lg2mean | LCMS          | 12 | 0.61056            | 0.70981    | 0.02775         | 0.59286              | 0.028732              | 0.870559 | 0.0332               |

### Correlation C\_pooltop2lg2mean\_tp2 symbol LCMS

#### The CORR Procedure

Gene\_Symbol=C4A-C4B

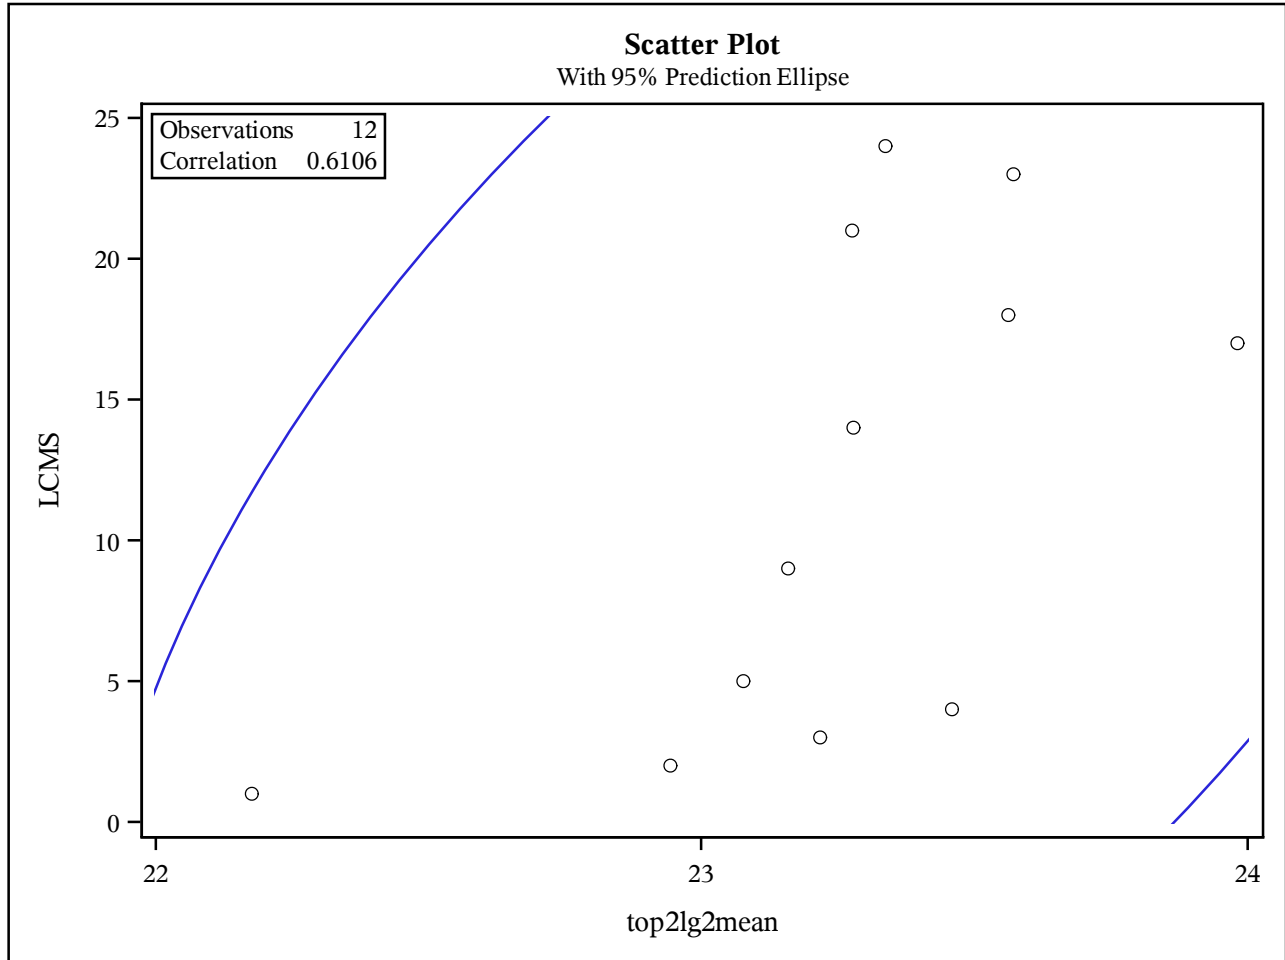

**Correlation C\_pooltop2lg2mean\_tp2 symbol LCMS****The CORR Procedure**

Gene\_Symbol=C7

2 Variables: top2lg2mean LCMS

| Simple Statistics |    |          |         |           |          |          |
|-------------------|----|----------|---------|-----------|----------|----------|
| Variable          | N  | Mean     | Std Dev | Sum       | Minimum  | Maximum  |
| top2lg2mean       | 12 | 19.42969 | 0.32606 | 233.15628 | 18.96587 | 19.88187 |
| LCMS              | 12 | 11.75000 | 8.70867 | 141.00000 | 1.00000  | 24.00000 |

| Pearson Correlation Coefficients, N = 12<br>Prob >  r  under H0: Rho=0 |                   |                   |
|------------------------------------------------------------------------|-------------------|-------------------|
|                                                                        | top2lg2mean       | LCMS              |
| top2lg2mean                                                            | 1.00000           | 0.50004<br>0.0978 |
| LCMS                                                                   | 0.50004<br>0.0978 | 1.00000           |

**Pearson Correlation Statistics (Fisher's z Transformation)**

| Variable    | With Variable | N  | Sample Correlation | Fisher's z | Bias Adjustment | Correlation Estimate | 95% Confidence Limits |          | p Value for H0:Rho=0 |
|-------------|---------------|----|--------------------|------------|-----------------|----------------------|-----------------------|----------|----------------------|
| top2lg2mean | LCMS          | 12 | 0.50004            | 0.54936    | 0.02273         | 0.48280              | -0.126015             | 0.827437 | 0.0993               |

**Correlation C\_pooltop2lg2mean\_tp2 symbol LCMS**

**The CORR Procedure**

Gene\_Symbol=C7

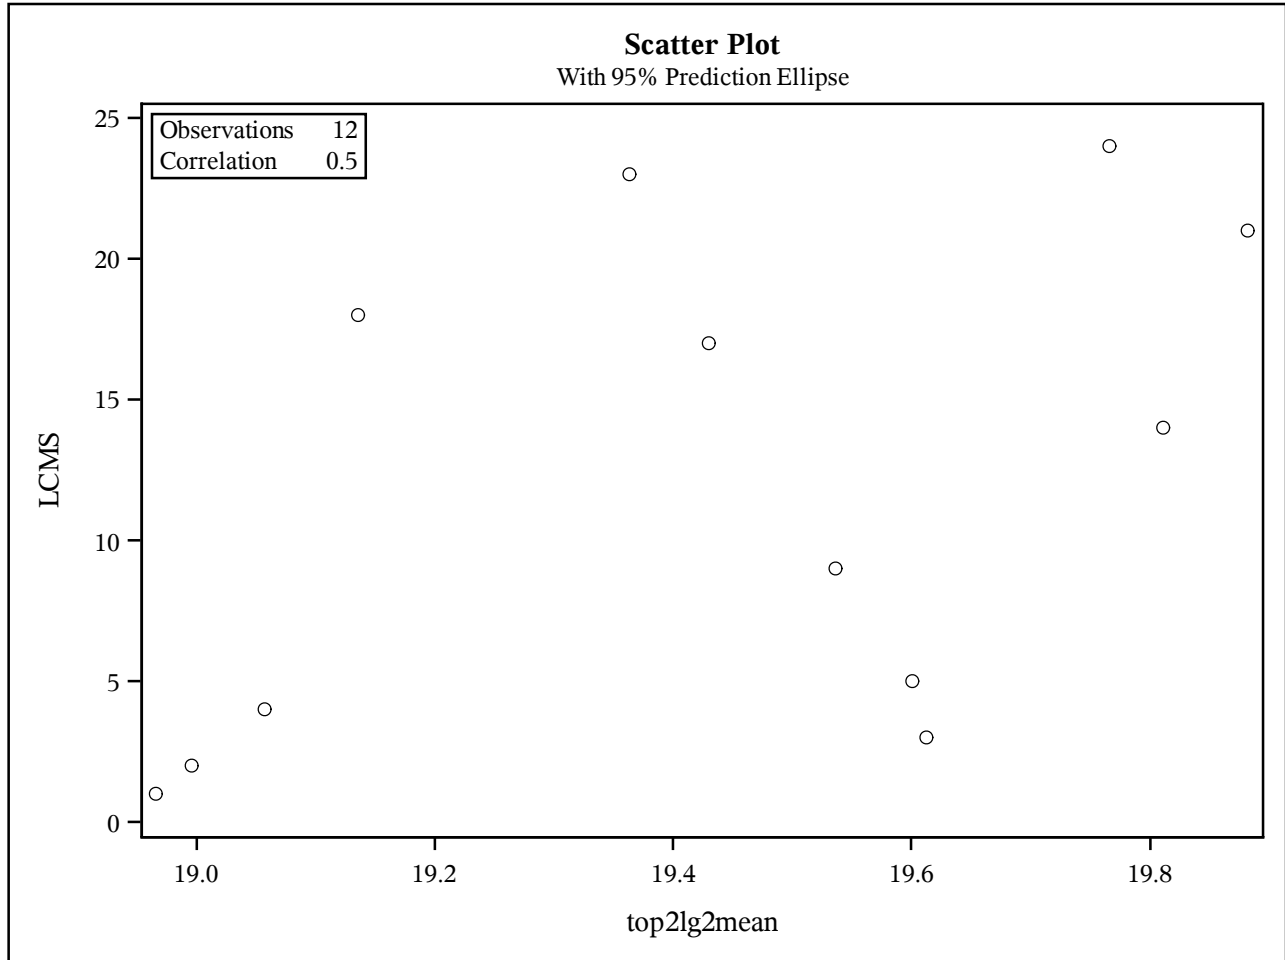

**Correlation C\_pooltop2lg2mean\_tp2 symbol LCMS****The CORR Procedure**

Gene\_Symbol=CD14

2 Variables: top2lg2mean LCMS

| Simple Statistics |    |          |         |           |          |          |
|-------------------|----|----------|---------|-----------|----------|----------|
| Variable          | N  | Mean     | Std Dev | Sum       | Minimum  | Maximum  |
| top2lg2mean       | 12 | 21.00887 | 0.30714 | 252.10641 | 20.57639 | 21.50118 |
| LCMS              | 12 | 11.75000 | 8.70867 | 141.00000 | 1.00000  | 24.00000 |

| Pearson Correlation Coefficients, N = 12<br>Prob >  r  under H0: Rho=0 |                   |                   |
|------------------------------------------------------------------------|-------------------|-------------------|
|                                                                        | top2lg2mean       | LCMS              |
| top2lg2mean                                                            | 1.00000           | 0.53670<br>0.0720 |
| LCMS                                                                   | 0.53670<br>0.0720 | 1.00000           |

| Pearson Correlation Statistics (Fisher's z Transformation) |               |    |                    |            |                 |                      |                       |          |                      |
|------------------------------------------------------------|---------------|----|--------------------|------------|-----------------|----------------------|-----------------------|----------|----------------------|
| Variable                                                   | With Variable | N  | Sample Correlation | Fisher's z | Bias Adjustment | Correlation Estimate | 95% Confidence Limits |          | p Value for H0:Rho=0 |
| top2lg2mean                                                | LCMS          | 12 | 0.53670            | 0.59951    | 0.02440         | 0.51911              | -0.078047             | 0.842125 | 0.0721               |

**Correlation C\_pooltop2lg2mean\_tp2 symbol LCMS**

**The CORR Procedure**

Gene\_Symbol=CD14

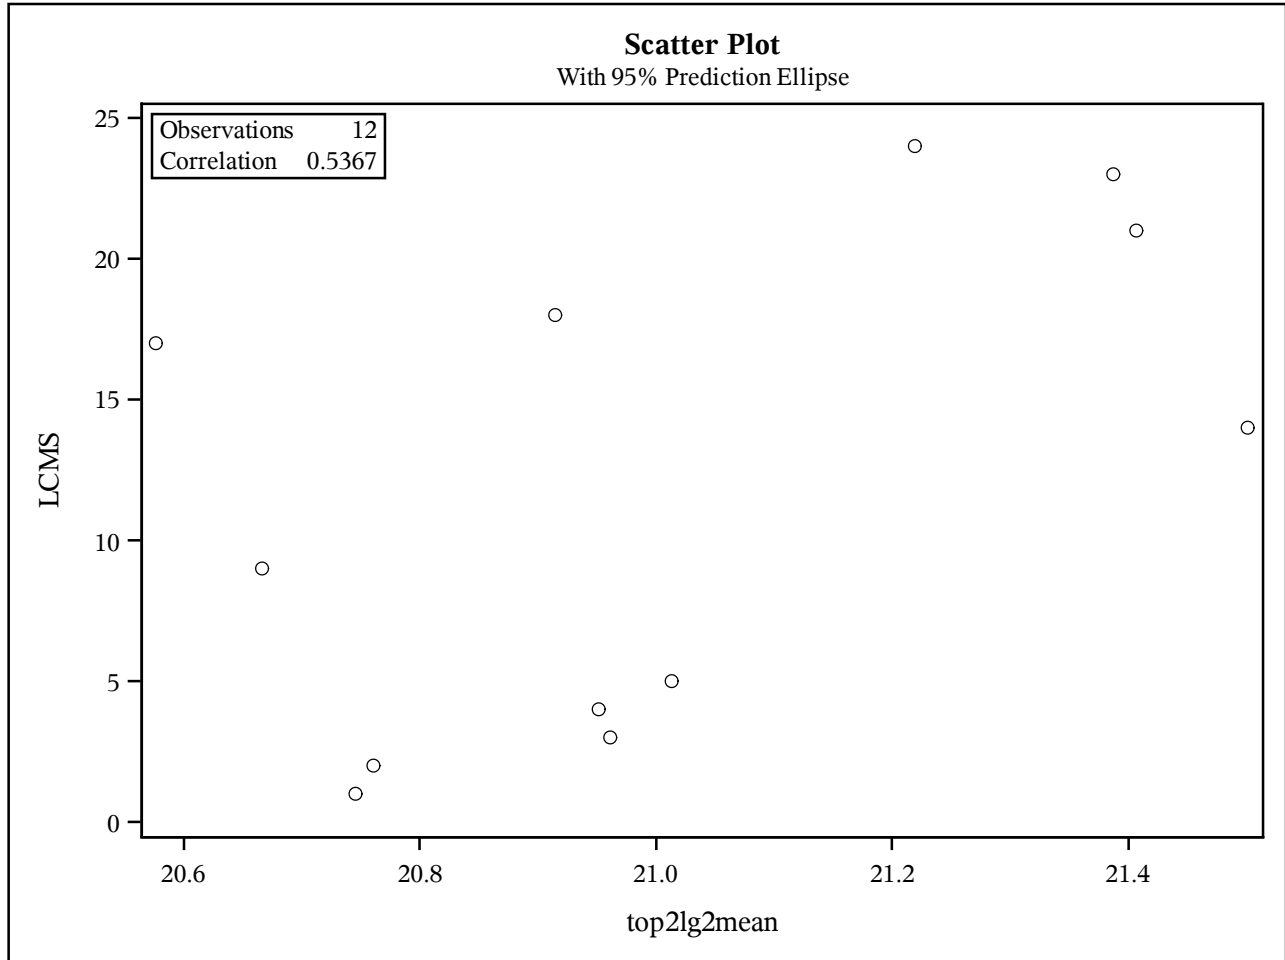



**Correlation C\_pooltop2lg2mean\_tp2 symbol LCMS****The CORR Procedure**

Gene\_Symbol=CD59

2 Variables: top2lg2mean LCMS

| Simple Statistics |    |          |         |           |          |          |
|-------------------|----|----------|---------|-----------|----------|----------|
| Variable          | N  | Mean     | Std Dev | Sum       | Minimum  | Maximum  |
| top2lg2mean       | 12 | 20.70554 | 0.36595 | 248.46650 | 19.73407 | 21.12204 |
| LCMS              | 12 | 11.75000 | 8.70867 | 141.00000 | 1.00000  | 24.00000 |

| Pearson Correlation Coefficients, N = 12<br>Prob >  r  under H0: Rho=0 |                   |                   |
|------------------------------------------------------------------------|-------------------|-------------------|
|                                                                        | top2lg2mean       | LCMS              |
| top2lg2mean                                                            | 1.00000           | 0.39848<br>0.1995 |
| LCMS                                                                   | 0.39848<br>0.1995 | 1.00000           |

| Pearson Correlation Statistics (Fisher's z Transformation) |               |    |                    |            |                 |                      |                       |          |                      |
|------------------------------------------------------------|---------------|----|--------------------|------------|-----------------|----------------------|-----------------------|----------|----------------------|
| Variable                                                   | With Variable | N  | Sample Correlation | Fisher's z | Bias Adjustment | Correlation Estimate | 95% Confidence Limits |          | p Value for H0:Rho=0 |
| top2lg2mean                                                | LCMS          | 12 | 0.39848            | 0.42184    | 0.01811         | 0.38314              | -0.244533             | 0.784533 | 0.2057               |

**Correlation C\_pooltop2lg2mean\_tp2 symbol LCMS**

**The CORR Procedure**

Gene\_Symbol=CD59

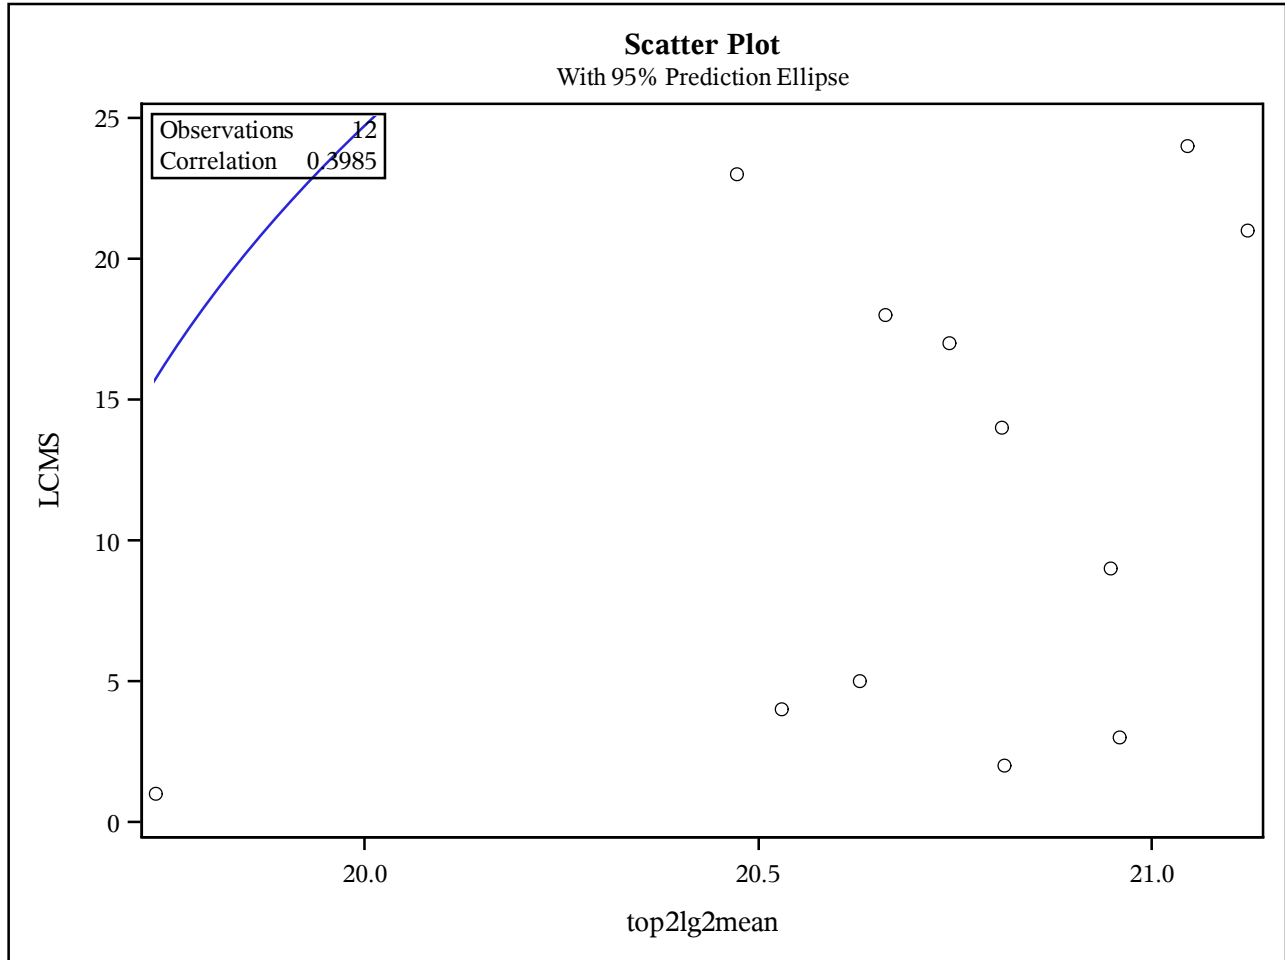

**Correlation C\_pooltop2lg2mean\_tp2 symbol LCMS****The CORR Procedure**

Gene\_Symbol=CFB

2 Variables: top2lg2mean LCMS

| Simple Statistics |    |          |         |           |          |          |
|-------------------|----|----------|---------|-----------|----------|----------|
| Variable          | N  | Mean     | Std Dev | Sum       | Minimum  | Maximum  |
| top2lg2mean       | 12 | 20.10731 | 0.36953 | 241.28777 | 19.43929 | 20.88184 |
| LCMS              | 12 | 11.75000 | 8.70867 | 141.00000 | 1.00000  | 24.00000 |

| Pearson Correlation Coefficients, N = 12<br>Prob >  r  under H0: Rho=0 |                   |                   |
|------------------------------------------------------------------------|-------------------|-------------------|
|                                                                        | top2lg2mean       | LCMS              |
| top2lg2mean                                                            | 1.00000           | 0.49220<br>0.1041 |
| LCMS                                                                   | 0.49220<br>0.1041 | 1.00000           |

| Pearson Correlation Statistics (Fisher's z Transformation) |               |    |                    |            |                 |                      |                       |          |                      |
|------------------------------------------------------------|---------------|----|--------------------|------------|-----------------|----------------------|-----------------------|----------|----------------------|
| Variable                                                   | With Variable | N  | Sample Correlation | Fisher's z | Bias Adjustment | Correlation Estimate | 95% Confidence Limits |          | p Value for H0:Rho=0 |
| top2lg2mean                                                | LCMS          | 12 | 0.49220            | 0.53896    | 0.02237         | 0.47506              | -0.135889             | 0.824243 | 0.1059               |

# Correlation C\_pooltop2lg2mean\_tp2 symbol LCMS

## The CORR Procedure

Gene\_Symbol=CFB

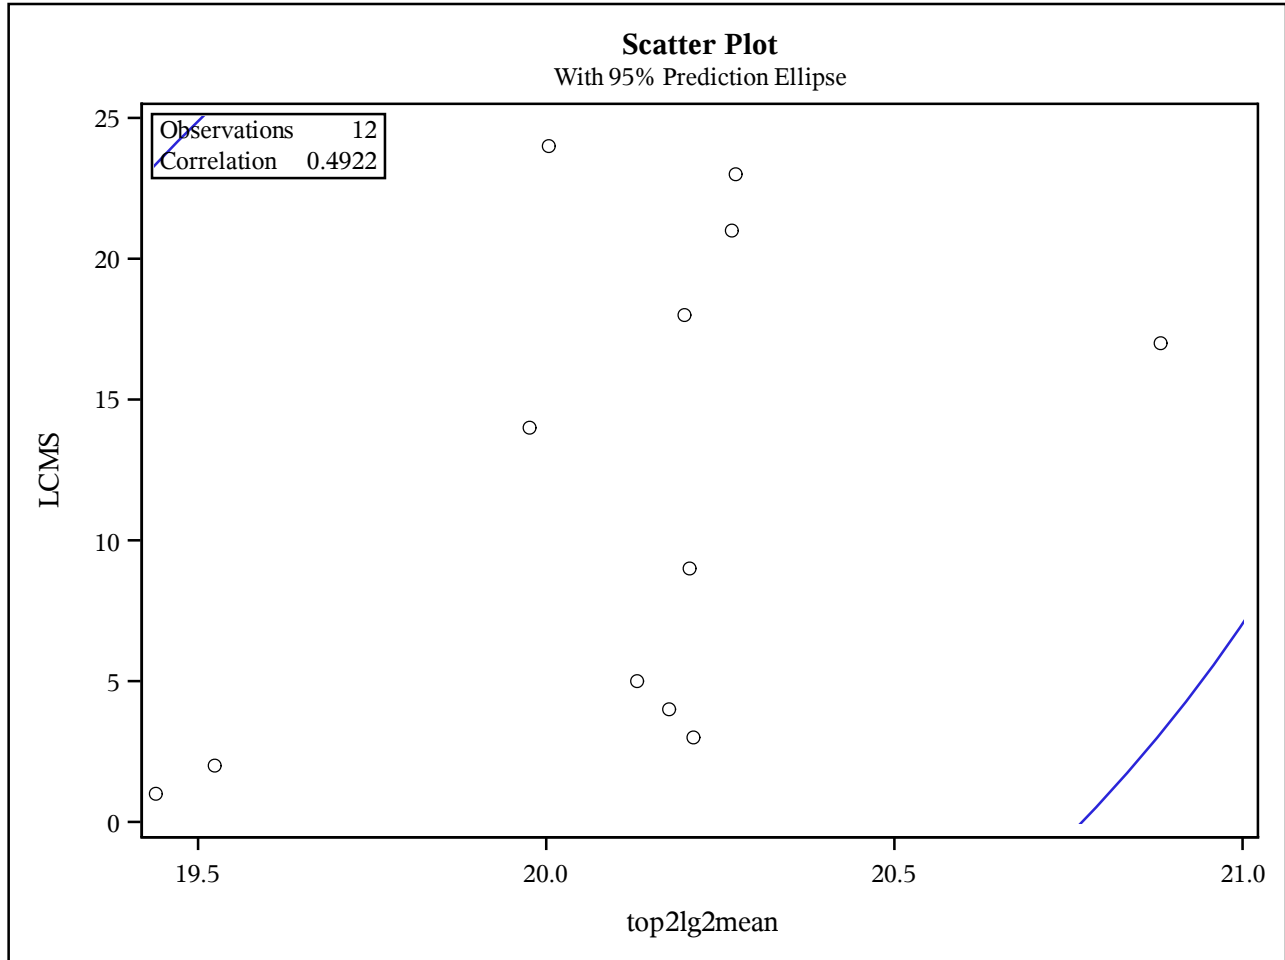

**Correlation C\_pooltop2lg2mean\_tp2 symbol LCMS****The CORR Procedure**

Gene\_Symbol=CFH

2 Variables: top2lg2mean LCMS

| Simple Statistics |    |          |         |           |          |          |
|-------------------|----|----------|---------|-----------|----------|----------|
| Variable          | N  | Mean     | Std Dev | Sum       | Minimum  | Maximum  |
| top2lg2mean       | 12 | 20.28654 | 0.23510 | 243.43848 | 19.71553 | 20.55740 |
| LCMS              | 12 | 11.75000 | 8.70867 | 141.00000 | 1.00000  | 24.00000 |

| Pearson Correlation Coefficients, N = 12<br>Prob >  r  under H0: Rho=0 |                   |                   |
|------------------------------------------------------------------------|-------------------|-------------------|
|                                                                        | top2lg2mean       | LCMS              |
| top2lg2mean                                                            | 1.00000           | 0.63336<br>0.0270 |
| LCMS                                                                   | 0.63336<br>0.0270 | 1.00000           |

| Pearson Correlation Statistics (Fisher's z Transformation) |               |    |                    |            |                 |                      |                       |          |                      |
|------------------------------------------------------------|---------------|----|--------------------|------------|-----------------|----------------------|-----------------------|----------|----------------------|
| Variable                                                   | With Variable | N  | Sample Correlation | Fisher's z | Bias Adjustment | Correlation Estimate | 95% Confidence Limits |          | p Value for H0:Rho=0 |
| top2lg2mean                                                | LCMS          | 12 | 0.63336            | 0.74701    | 0.02879         | 0.61581              | 0.064809              | 0.879043 | 0.0250               |

**Correlation C\_pooltop2lg2mean\_tp2 symbol LCMS**

**The CORR Procedure**

Gene\_Symbol=CFH

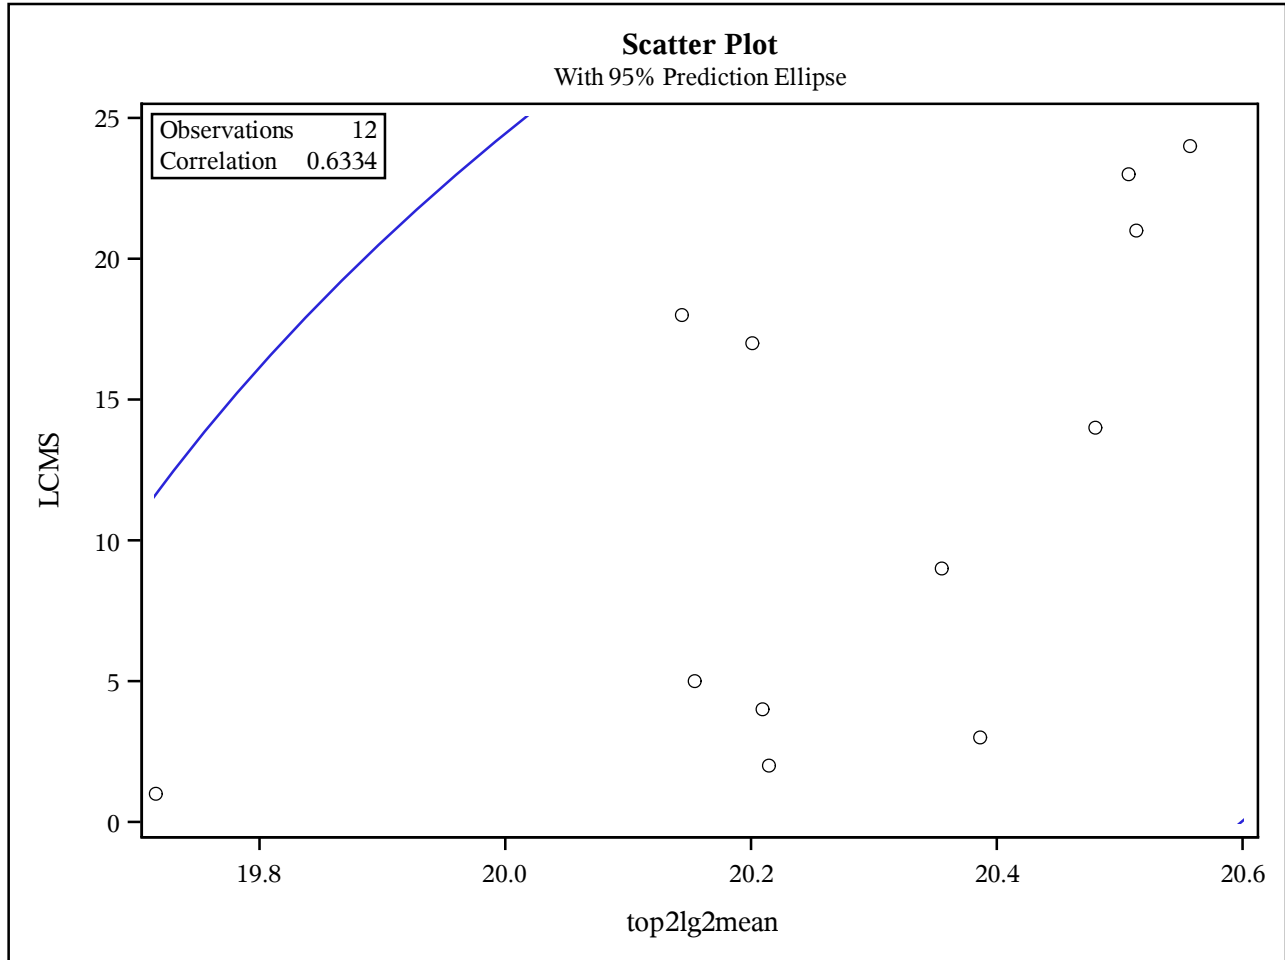

**Correlation C\_pooltop2lg2mean\_tp2 symbol LCMS****The CORR Procedure**

Gene\_Symbol=CHGA

2 Variables: top2lg2mean LCMS

| Simple Statistics |    |          |         |           |          |          |
|-------------------|----|----------|---------|-----------|----------|----------|
| Variable          | N  | Mean     | Std Dev | Sum       | Minimum  | Maximum  |
| top2lg2mean       | 12 | 22.61559 | 0.18595 | 271.38709 | 22.31285 | 22.88093 |
| LCMS              | 12 | 11.75000 | 8.70867 | 141.00000 | 1.00000  | 24.00000 |

| Pearson Correlation Coefficients, N = 12<br>Prob >  r  under H0: Rho=0 |                   |                   |
|------------------------------------------------------------------------|-------------------|-------------------|
|                                                                        | top2lg2mean       | LCMS              |
| top2lg2mean                                                            | 1.00000           | 0.14704<br>0.6484 |
| LCMS                                                                   | 0.14704<br>0.6484 | 1.00000           |

**Pearson Correlation Statistics (Fisher's z Transformation)**

| Variable    | With Variable | N  | Sample Correlation | Fisher's z | Bias Adjustment | Correlation Estimate | 95% Confidence Limits |          | p Value for H0:Rho=0 |
|-------------|---------------|----|--------------------|------------|-----------------|----------------------|-----------------------|----------|----------------------|
| top2lg2mean | LCMS          | 12 | 0.14704            | 0.14812    | 0.00668         | 0.14050              | -0.471416             | 0.661093 | 0.6568               |

**Correlation C\_pooltop2lg2mean\_tp2 symbol LCMS****The CORR Procedure**

Gene\_Symbol=CHGA

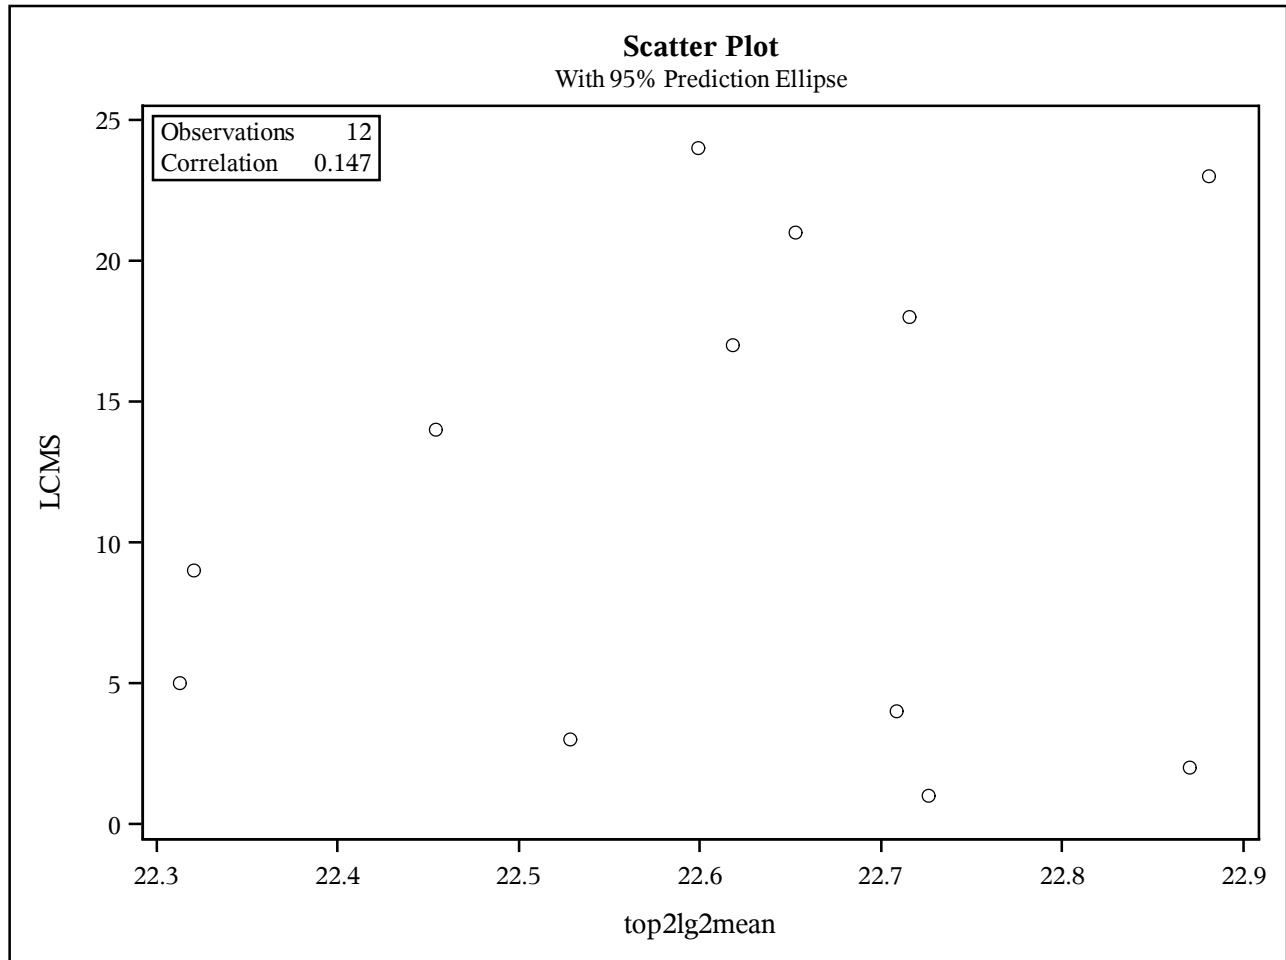



**Correlation C\_pooltop2lg2mean\_tp2 symbol LCMS****The CORR Procedure**

Gene\_Symbol=CHGB

2 Variables: top2lg2mean LCMS

| Simple Statistics |    |          |         |           |          |          |
|-------------------|----|----------|---------|-----------|----------|----------|
| Variable          | N  | Mean     | Std Dev | Sum       | Minimum  | Maximum  |
| top2lg2mean       | 12 | 22.22482 | 0.18428 | 266.69786 | 21.95818 | 22.55311 |
| LCMS              | 12 | 11.75000 | 8.70867 | 141.00000 | 1.00000  | 24.00000 |

| Pearson Correlation Coefficients, N = 12<br>Prob >  r  under H0: Rho=0 |                   |                   |
|------------------------------------------------------------------------|-------------------|-------------------|
|                                                                        | top2lg2mean       | LCMS              |
| top2lg2mean                                                            | 1.00000           | 0.10246<br>0.7513 |
| LCMS                                                                   | 0.10246<br>0.7513 | 1.00000           |

**Pearson Correlation Statistics (Fisher's z Transformation)**

| Variable    | With Variable | N  | Sample Correlation | Fisher's z | Bias Adjustment | Correlation Estimate | 95% Confidence Limits |          | p Value for H0:Rho=0 |
|-------------|---------------|----|--------------------|------------|-----------------|----------------------|-----------------------|----------|----------------------|
| top2lg2mean | LCMS          | 12 | 0.10246            | 0.10282    | 0.00466         | 0.09785              | -0.504374             | 0.636035 | 0.7577               |

**Correlation C\_pooltop2lg2mean\_tp2 symbol LCMS**

**The CORR Procedure**

Gene\_Symbol=CHGB

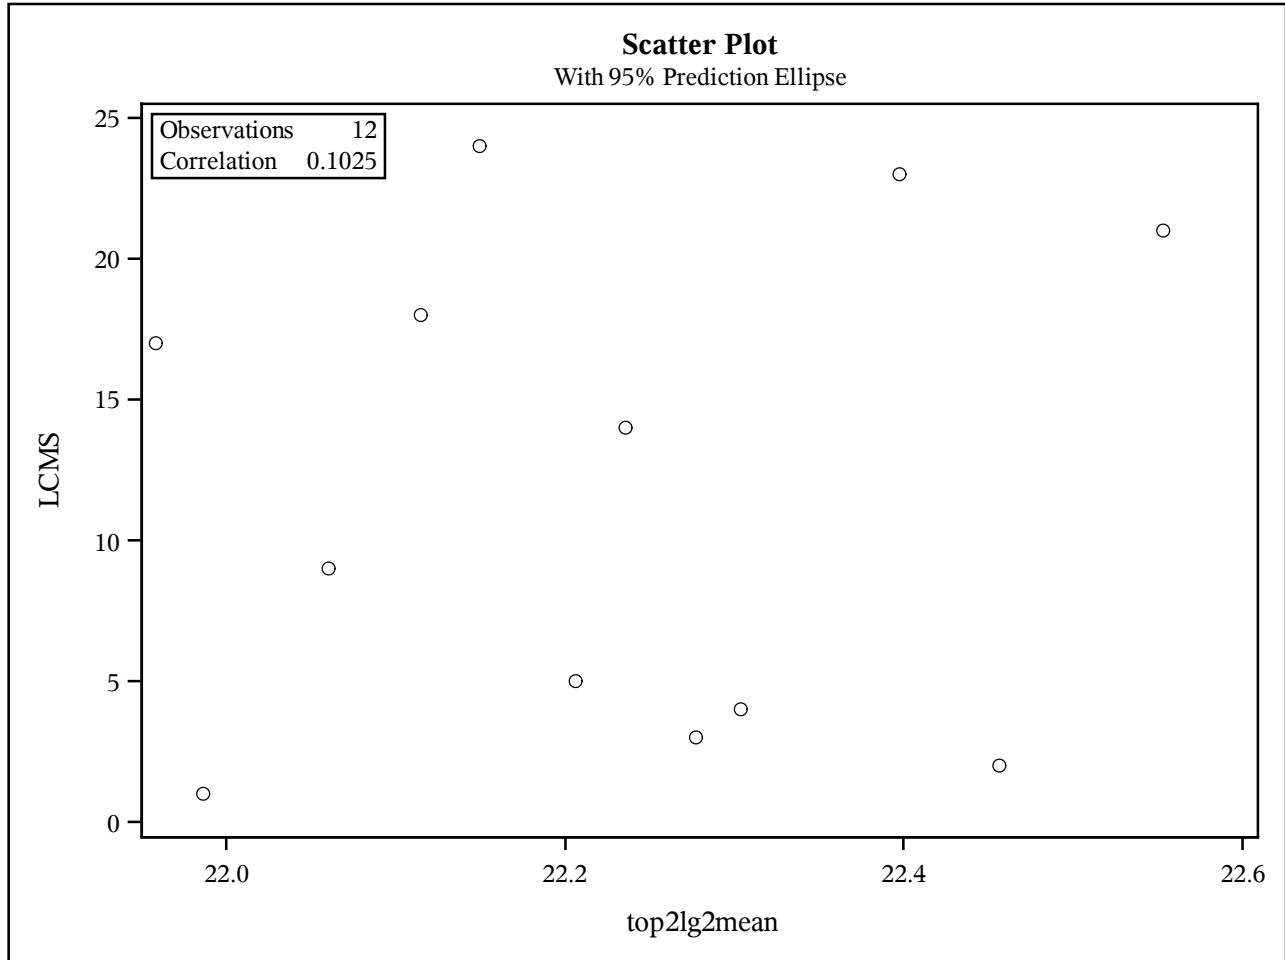

**Correlation C\_pooltop2lg2mean\_tp2 symbol LCMS****The CORR Procedure**

Gene\_Symbol=CHL1

2 Variables: top2lg2mean LCMS

| Simple Statistics |    |          |         |           |          |          |
|-------------------|----|----------|---------|-----------|----------|----------|
| Variable          | N  | Mean     | Std Dev | Sum       | Minimum  | Maximum  |
| top2lg2mean       | 12 | 20.32975 | 0.64128 | 243.95697 | 19.43727 | 21.37758 |
| LCMS              | 12 | 11.75000 | 8.70867 | 141.00000 | 1.00000  | 24.00000 |

| Pearson Correlation Coefficients, N = 12<br>Prob >  r  under H0: Rho=0 |                   |                   |
|------------------------------------------------------------------------|-------------------|-------------------|
|                                                                        | top2lg2mean       | LCMS              |
| top2lg2mean                                                            | 1.00000           | 0.38822<br>0.2124 |
| LCMS                                                                   | 0.38822<br>0.2124 | 1.00000           |

| Pearson Correlation Statistics (Fisher's z Transformation) |               |    |                    |            |                 |                      |                       |          |                      |
|------------------------------------------------------------|---------------|----|--------------------|------------|-----------------|----------------------|-----------------------|----------|----------------------|
| Variable                                                   | With Variable | N  | Sample Correlation | Fisher's z | Bias Adjustment | Correlation Estimate | 95% Confidence Limits |          | p Value for H0:Rho=0 |
| top2lg2mean                                                | LCMS          | 12 | 0.38822            | 0.40971    | 0.01765         | 0.37313              | -0.255475             | 0.780004 | 0.2190               |

**Correlation C\_pooltop2lg2mean\_tp2 symbol LCMS**

**The CORR Procedure**

Gene\_Symbol=CHL1

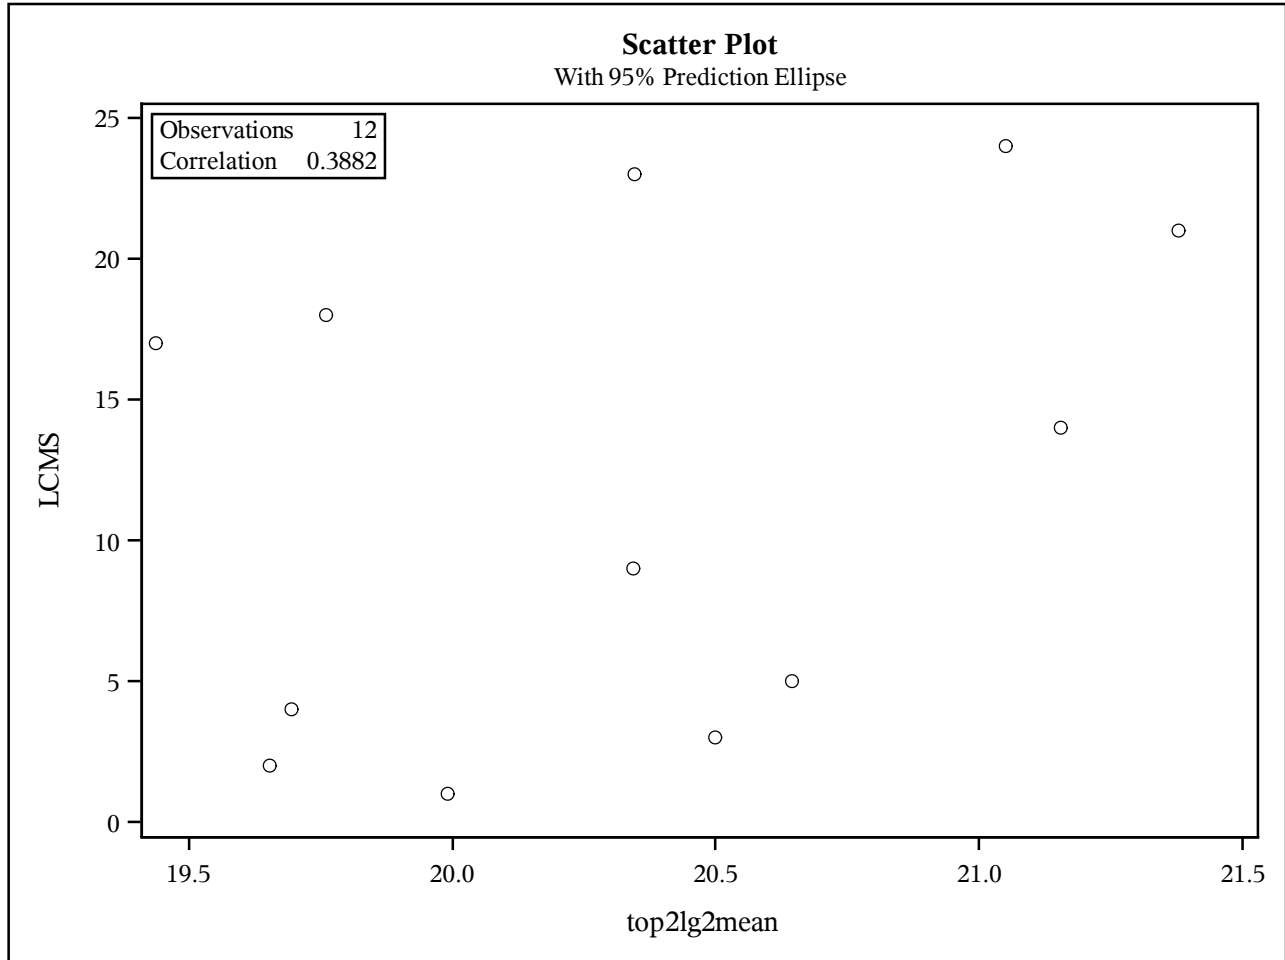

**Correlation C\_pooltop2lg2mean\_tp2 symbol LCMS****The CORR Procedure**

Gene\_Symbol=CLU

2 Variables: top2lg2mean LCMS

| Simple Statistics |    |          |         |           |          |          |
|-------------------|----|----------|---------|-----------|----------|----------|
| Variable          | N  | Mean     | Std Dev | Sum       | Minimum  | Maximum  |
| top2lg2mean       | 12 | 24.56620 | 0.25894 | 294.79441 | 24.03016 | 24.87867 |
| LCMS              | 12 | 11.75000 | 8.70867 | 141.00000 | 1.00000  | 24.00000 |

| Pearson Correlation Coefficients, N = 12<br>Prob >  r  under H0: Rho=0 |                   |                   |
|------------------------------------------------------------------------|-------------------|-------------------|
|                                                                        | top2lg2mean       | LCMS              |
| top2lg2mean                                                            | 1.00000           | 0.72523<br>0.0076 |
| LCMS                                                                   | 0.72523<br>0.0076 | 1.00000           |

**Pearson Correlation Statistics (Fisher's z Transformation)**

| Variable    | With Variable | N  | Sample Correlation | Fisher's z | Bias Adjustment | Correlation Estimate | 95% Confidence Limits |          | p Value for H0:Rho=0 |
|-------------|---------------|----|--------------------|------------|-----------------|----------------------|-----------------------|----------|----------------------|
| top2lg2mean | LCMS          | 12 | 0.72523            | 0.91859    | 0.03296         | 0.70922              | 0.228211              | 0.911943 | 0.0059               |

**Correlation C\_pooltop2lg2mean\_tp2 symbol LCMS**

**The CORR Procedure**

Gene\_Symbol=CLU

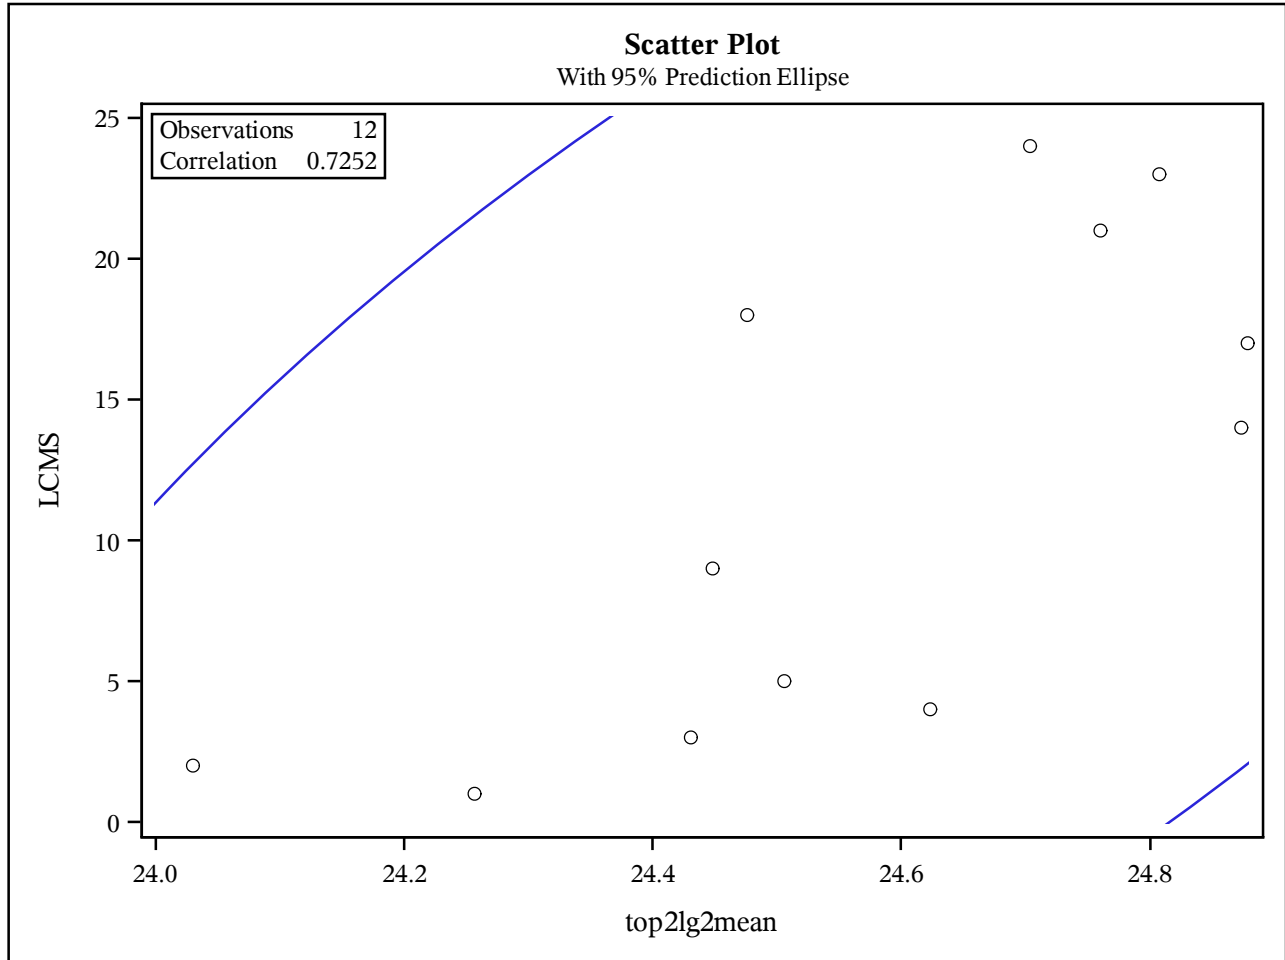

**Correlation C\_pooltop2lg2mean\_tp2 symbol LCMS****The CORR Procedure**

Gene\_Symbol=CNDP1

2 Variables: top2lg2mean LCMS

| Simple Statistics |    |          |         |           |          |          |
|-------------------|----|----------|---------|-----------|----------|----------|
| Variable          | N  | Mean     | Std Dev | Sum       | Minimum  | Maximum  |
| top2lg2mean       | 12 | 22.80093 | 0.11438 | 273.61114 | 22.58143 | 22.93465 |
| LCMS              | 12 | 11.75000 | 8.70867 | 141.00000 | 1.00000  | 24.00000 |

| Pearson Correlation Coefficients, N = 12<br>Prob >  r  under H0: Rho=0 |                   |                   |
|------------------------------------------------------------------------|-------------------|-------------------|
|                                                                        | top2lg2mean       | LCMS              |
| top2lg2mean                                                            | 1.00000           | 0.27949<br>0.3790 |
| LCMS                                                                   | 0.27949<br>0.3790 | 1.00000           |

**Pearson Correlation Statistics (Fisher's z Transformation)**

| Variable    | With Variable | N  | Sample Correlation | Fisher's z | Bias Adjustment | Correlation Estimate | 95% Confidence Limits |          | p Value for H0:Rho=0 |
|-------------|---------------|----|--------------------|------------|-----------------|----------------------|-----------------------|----------|----------------------|
| top2lg2mean | LCMS          | 12 | 0.27949            | 0.28712    | 0.01270         | 0.26773              | -0.361753             | 0.729539 | 0.3890               |

**Correlation C\_pooltop2lg2mean\_tp2 symbol LCMS****The CORR Procedure**

Gene\_Symbol=CNDP1

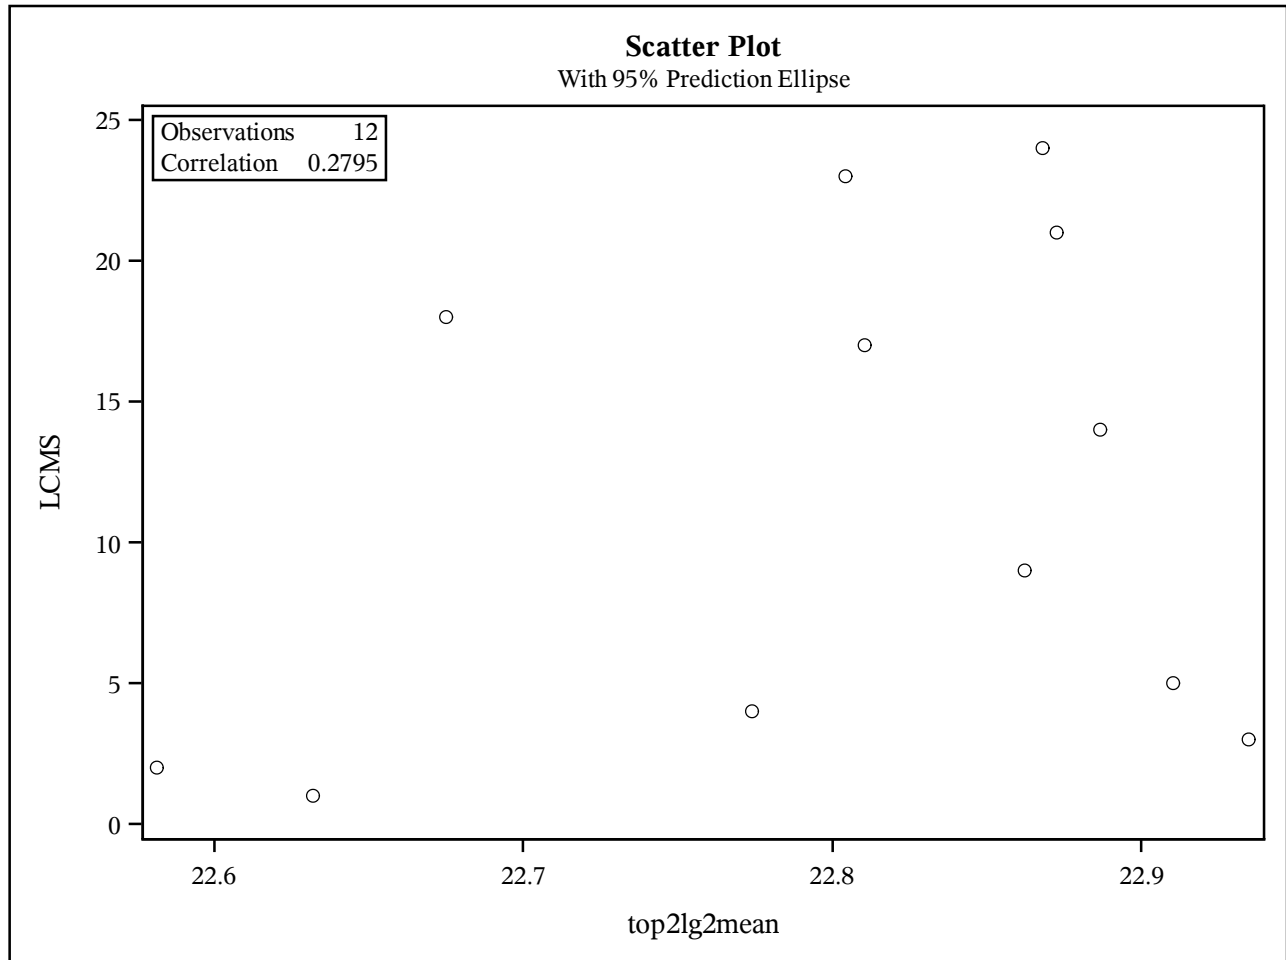



**Correlation C\_pooltop2lg2mean\_tp2 symbol LCMS****The CORR Procedure**

Gene\_Symbol=CNTN1

2 Variables: top2lg2mean LCMS

| Simple Statistics |    |          |         |           |          |          |
|-------------------|----|----------|---------|-----------|----------|----------|
| Variable          | N  | Mean     | Std Dev | Sum       | Minimum  | Maximum  |
| top2lg2mean       | 12 | 20.00227 | 0.16488 | 240.02726 | 19.59967 | 20.23726 |
| LCMS              | 12 | 11.75000 | 8.70867 | 141.00000 | 1.00000  | 24.00000 |

| Pearson Correlation Coefficients, N = 12<br>Prob >  r  under H0: Rho=0 |                   |                   |
|------------------------------------------------------------------------|-------------------|-------------------|
|                                                                        | top2lg2mean       | LCMS              |
| top2lg2mean                                                            | 1.00000           | 0.49263<br>0.1037 |
| LCMS                                                                   | 0.49263<br>0.1037 | 1.00000           |

| Pearson Correlation Statistics (Fisher's z Transformation) |               |    |                    |            |                 |                      |                       |          |                      |
|------------------------------------------------------------|---------------|----|--------------------|------------|-----------------|----------------------|-----------------------|----------|----------------------|
| Variable                                                   | With Variable | N  | Sample Correlation | Fisher's z | Bias Adjustment | Correlation Estimate | 95% Confidence Limits |          | p Value for H0:Rho=0 |
| top2lg2mean                                                | LCMS          | 12 | 0.49263            | 0.53952    | 0.02239         | 0.47548              | -0.135356             | 0.824417 | 0.1055               |

**Correlation C\_pooltop2lg2mean\_tp2 symbol LCMS**

**The CORR Procedure**

Gene\_Symbol=CNTN1

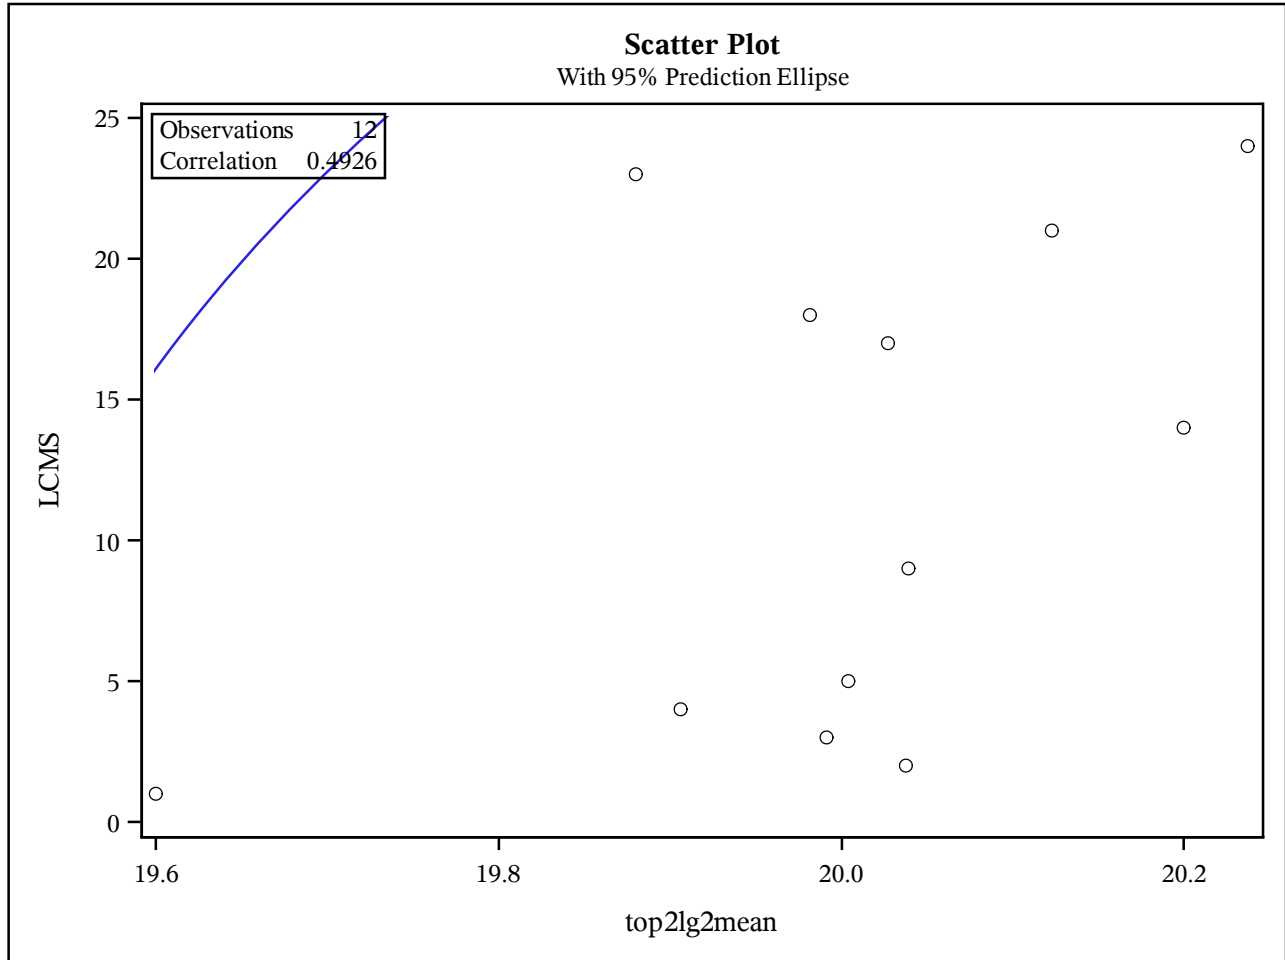

**Correlation C\_pooltop2lg2mean\_tp2 symbol LCMS****The CORR Procedure**

Gene\_Symbol=CP

2 Variables: top2lg2mean LCMS

| Simple Statistics |    |          |         |           |          |          |
|-------------------|----|----------|---------|-----------|----------|----------|
| Variable          | N  | Mean     | Std Dev | Sum       | Minimum  | Maximum  |
| top2lg2mean       | 12 | 22.55661 | 0.31053 | 270.67936 | 22.02298 | 23.05525 |
| LCMS              | 12 | 11.75000 | 8.70867 | 141.00000 | 1.00000  | 24.00000 |

| Pearson Correlation Coefficients, N = 12<br>Prob >  r  under H0: Rho=0 |                    |                    |
|------------------------------------------------------------------------|--------------------|--------------------|
|                                                                        | top2lg2mean        | LCMS               |
| top2lg2mean                                                            | 1.00000            | -0.29225<br>0.3567 |
| LCMS                                                                   | -0.29225<br>0.3567 | 1.00000            |

**Pearson Correlation Statistics (Fisher's z Transformation)**

| Variable    | With Variable | N  | Sample Correlation | Fisher's z | Bias Adjustment | Correlation Estimate | 95% Confidence Limits |          | p Value for H0:Rho=0 |
|-------------|---------------|----|--------------------|------------|-----------------|----------------------|-----------------------|----------|----------------------|
| top2lg2mean | LCMS          | 12 | -0.29225           | -0.30102   | -0.01328        | -0.28005             | -0.735709             | 0.350122 | 0.3665               |

**Correlation C\_pooltop2lg2mean\_tp2 symbol LCMS****The CORR Procedure**

Gene\_Symbol=CP

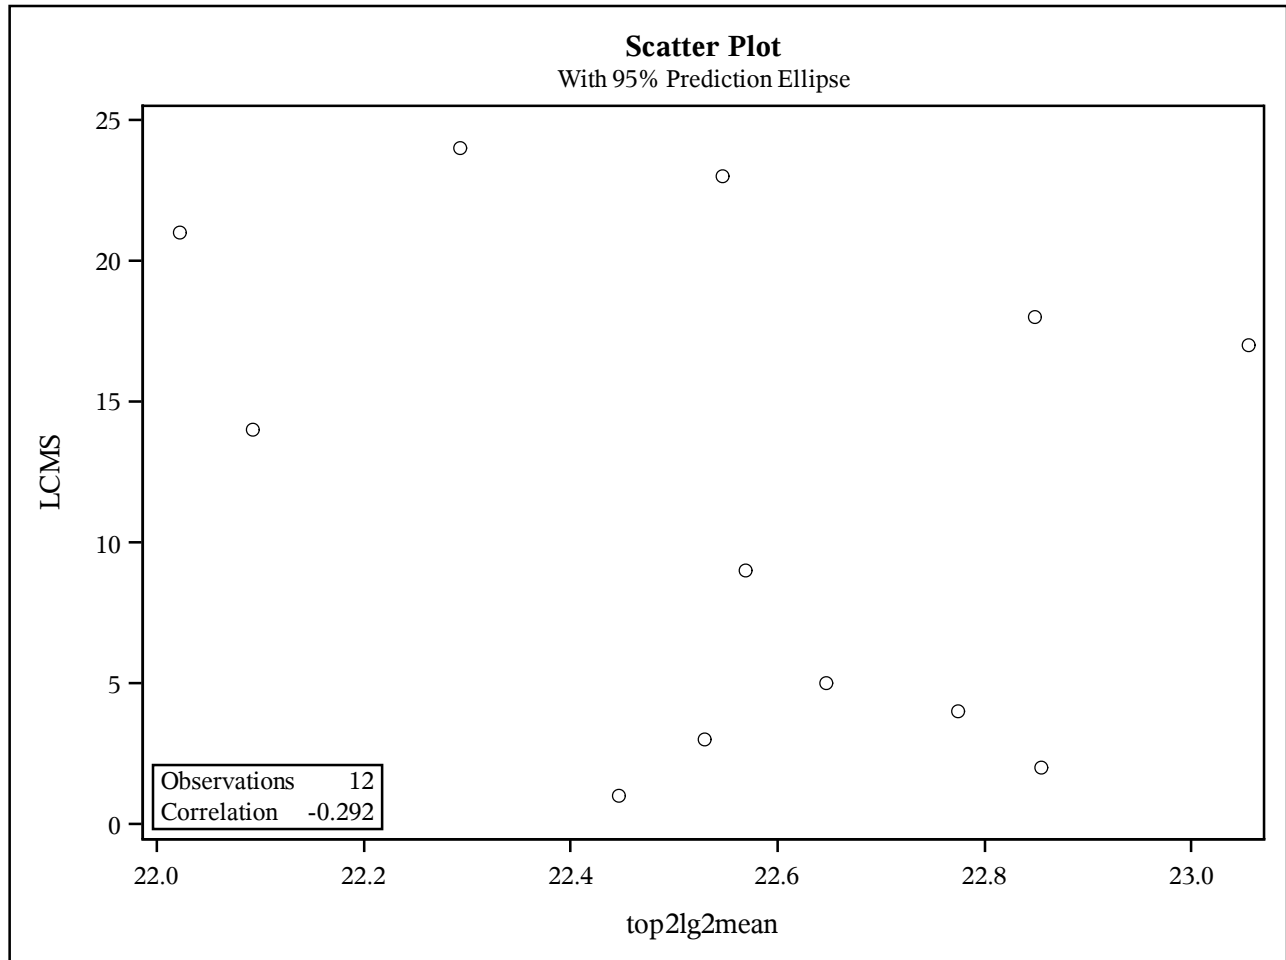

**Correlation C\_pooltop2lg2mean\_tp2 symbol LCMS****The CORR Procedure**

Gene\_Symbol=CPA1

2 Variables: top2lg2mean LCMS

| Simple Statistics |    |          |         |           |          |          |
|-------------------|----|----------|---------|-----------|----------|----------|
| Variable          | N  | Mean     | Std Dev | Sum       | Minimum  | Maximum  |
| top2lg2mean       | 12 | 16.97277 | 0.37952 | 203.67329 | 16.44452 | 17.86625 |
| LCMS              | 12 | 11.75000 | 8.70867 | 141.00000 | 1.00000  | 24.00000 |

| Pearson Correlation Coefficients, N = 12<br>Prob >  r  under H0: Rho=0 |                    |                    |
|------------------------------------------------------------------------|--------------------|--------------------|
|                                                                        | top2lg2mean        | LCMS               |
| top2lg2mean                                                            | 1.00000            | -0.53262<br>0.0746 |
| LCMS                                                                   | -0.53262<br>0.0746 | 1.00000            |

| Pearson Correlation Statistics (Fisher's z Transformation) |               |    |                    |            |                 |                      |                       |          |                      |
|------------------------------------------------------------|---------------|----|--------------------|------------|-----------------|----------------------|-----------------------|----------|----------------------|
| Variable                                                   | With Variable | N  | Sample Correlation | Fisher's z | Bias Adjustment | Correlation Estimate | 95% Confidence Limits |          | p Value for H0:Rho=0 |
| top2lg2mean                                                | LCMS          | 12 | -0.53262           | -0.59380   | -0.02421        | -0.51506             | -0.840510             | 0.083540 | 0.0748               |

**Correlation C\_pooltop2lg2mean\_tp2 symbol LCMS****The CORR Procedure**

Gene\_Symbol=CPA1

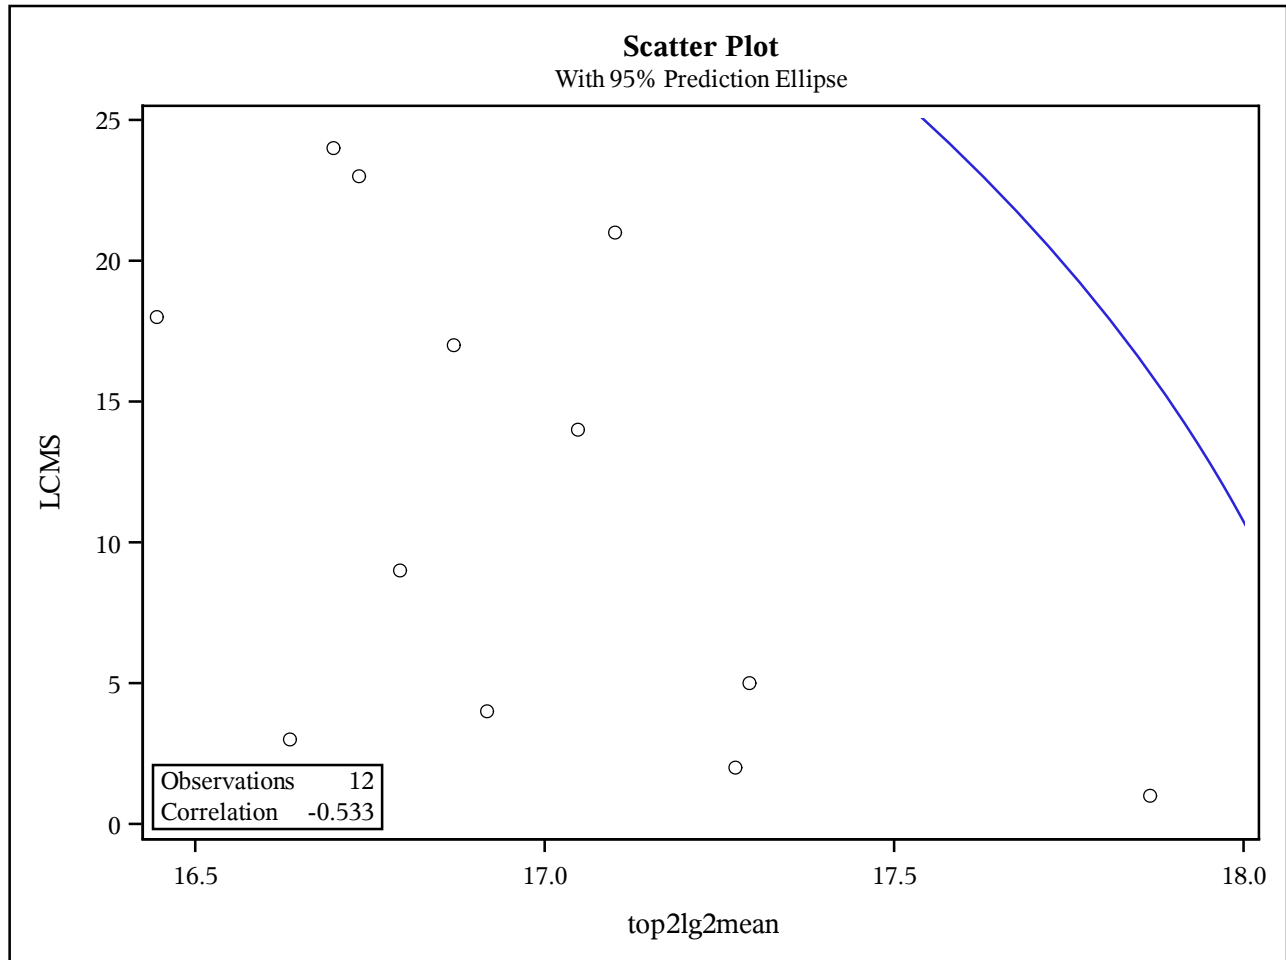

**Correlation C\_pooltop2lg2mean\_tp2 symbol LCMS****The CORR Procedure**

Gene\_Symbol=CPE

2 Variables: top2lg2mean LCMS

| Simple Statistics |    |          |         |           |          |          |
|-------------------|----|----------|---------|-----------|----------|----------|
| Variable          | N  | Mean     | Std Dev | Sum       | Minimum  | Maximum  |
| top2lg2mean       | 12 | 17.11630 | 0.28200 | 205.39565 | 16.67208 | 17.43015 |
| LCMS              | 12 | 11.75000 | 8.70867 | 141.00000 | 1.00000  | 24.00000 |

| Pearson Correlation Coefficients, N = 12<br>Prob >  r  under H0: Rho=0 |                   |                   |
|------------------------------------------------------------------------|-------------------|-------------------|
|                                                                        | top2lg2mean       | LCMS              |
| top2lg2mean                                                            | 1.00000           | 0.09411<br>0.7711 |
| LCMS                                                                   | 0.09411<br>0.7711 | 1.00000           |

**Pearson Correlation Statistics (Fisher's z Transformation)**

| Variable    | With Variable | N  | Sample Correlation | Fisher's z | Bias Adjustment | Correlation Estimate | 95% Confidence Limits |          | p Value for H0:Rho=0 |
|-------------|---------------|----|--------------------|------------|-----------------|----------------------|-----------------------|----------|----------------------|
| top2lg2mean | LCMS          | 12 | 0.09411            | 0.09439    | 0.00428         | 0.08987              | -0.510357             | 0.631214 | 0.7771               |

**Correlation C\_pooltop2lg2mean\_tp2 symbol LCMS**

**The CORR Procedure**

Gene\_Symbol=CPE

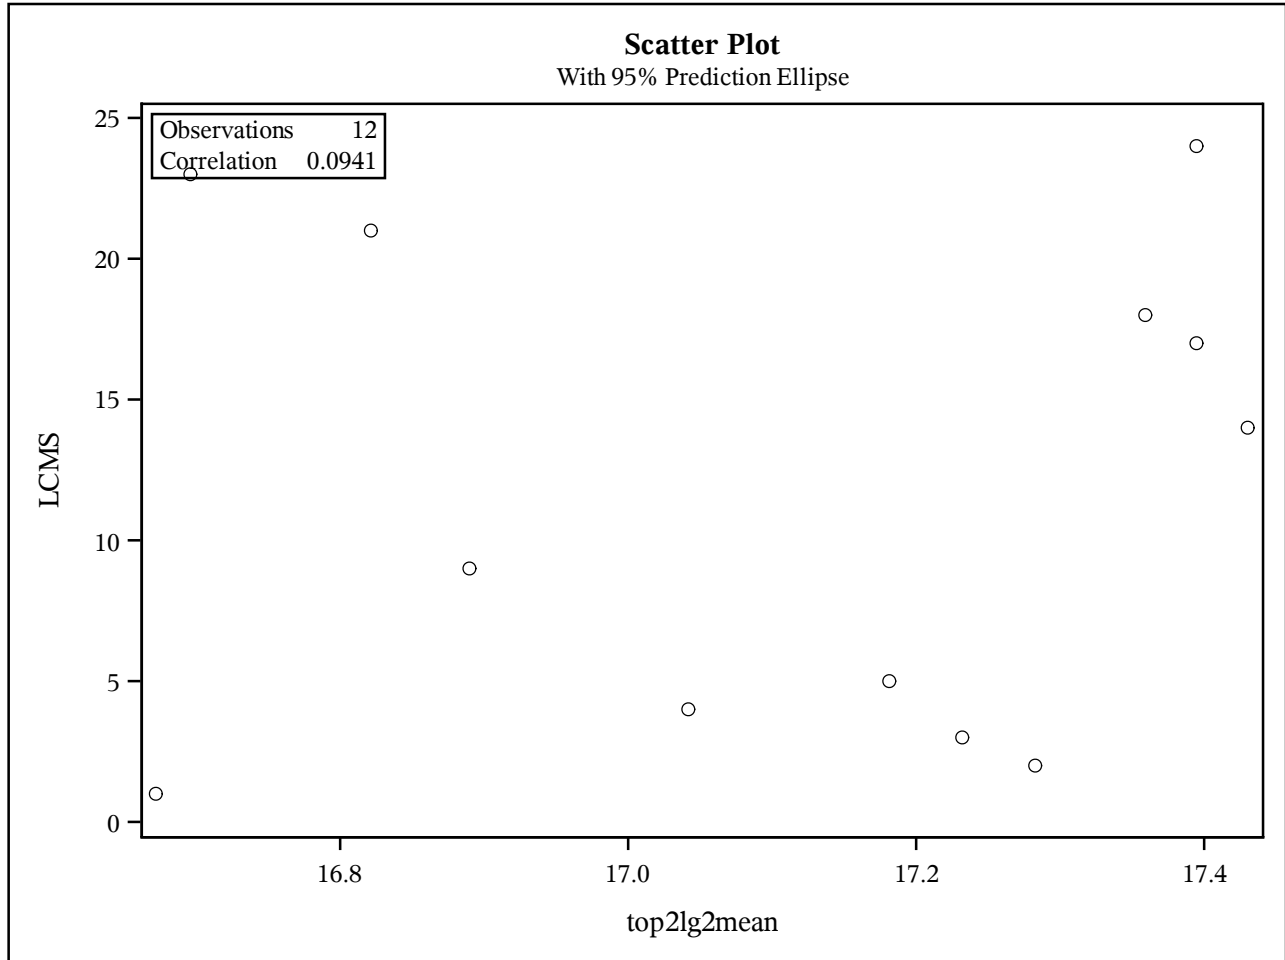



**Correlation C\_pooltop2lg2mean\_tp2 symbol LCMS****The CORR Procedure**

Gene\_Symbol=CRTAC1

2 Variables: top2lg2mean LCMS

| Simple Statistics |    |          |         |           |          |          |
|-------------------|----|----------|---------|-----------|----------|----------|
| Variable          | N  | Mean     | Std Dev | Sum       | Minimum  | Maximum  |
| top2lg2mean       | 12 | 16.15360 | 1.94327 | 193.84315 | 10.01973 | 17.06571 |
| LCMS              | 12 | 11.75000 | 8.70867 | 141.00000 | 1.00000  | 24.00000 |

| Pearson Correlation Coefficients, N = 12<br>Prob >  r  under H0: Rho=0 |                   |                   |
|------------------------------------------------------------------------|-------------------|-------------------|
|                                                                        | top2lg2mean       | LCMS              |
| top2lg2mean                                                            | 1.00000           | 0.28917<br>0.3620 |
| LCMS                                                                   | 0.28917<br>0.3620 | 1.00000           |

**Pearson Correlation Statistics (Fisher's z Transformation)**

| Variable    | With Variable | N  | Sample Correlation | Fisher's z | Bias Adjustment | Correlation Estimate | 95% Confidence Limits |          | p Value for H0:Rho=0 |
|-------------|---------------|----|--------------------|------------|-----------------|----------------------|-----------------------|----------|----------------------|
| top2lg2mean | LCMS          | 12 | 0.28917            | 0.29766    | 0.01314         | 0.27708              | -0.352950             | 0.734225 | 0.3719               |

# Correlation C\_pooltop2lg2mean\_tp2 symbol LCMS

## The CORR Procedure

Gene\_Symbol=CRTAC1

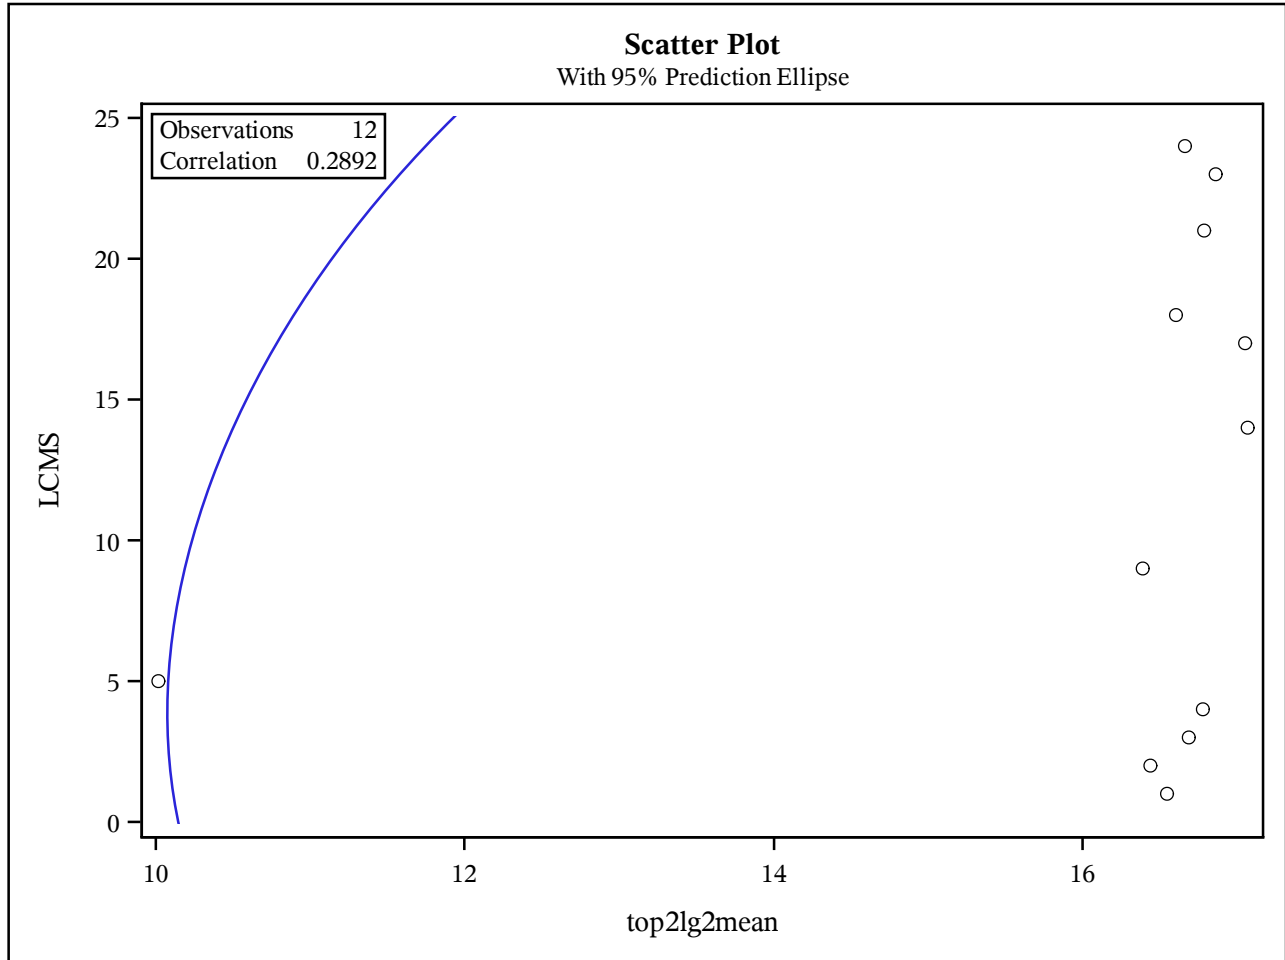

**Correlation C\_pooltop2lg2mean\_tp2 symbol LCMS****The CORR Procedure**

Gene\_Symbol=CST3

2 Variables: top2lg2mean LCMS

| Simple Statistics |    |          |         |           |          |          |
|-------------------|----|----------|---------|-----------|----------|----------|
| Variable          | N  | Mean     | Std Dev | Sum       | Minimum  | Maximum  |
| top2lg2mean       | 12 | 25.23753 | 0.16033 | 302.85033 | 24.95270 | 25.56438 |
| LCMS              | 12 | 11.75000 | 8.70867 | 141.00000 | 1.00000  | 24.00000 |

| Pearson Correlation Coefficients, N = 12<br>Prob >  r  under H0: Rho=0 |                   |                   |
|------------------------------------------------------------------------|-------------------|-------------------|
|                                                                        | top2lg2mean       | LCMS              |
| top2lg2mean                                                            | 1.00000           | 0.28532<br>0.3687 |
| LCMS                                                                   | 0.28532<br>0.3687 | 1.00000           |

**Pearson Correlation Statistics (Fisher's z Transformation)**

| Variable    | With Variable | N  | Sample Correlation | Fisher's z | Bias Adjustment | Correlation Estimate | 95% Confidence Limits |          | p Value for H0:Rho=0 |
|-------------|---------------|----|--------------------|------------|-----------------|----------------------|-----------------------|----------|----------------------|
| top2lg2mean | LCMS          | 12 | 0.28532            | 0.29346    | 0.01297         | 0.27336              | -0.356462             | 0.732368 | 0.3786               |

**Correlation C\_pooltop2lg2mean\_tp2 symbol LCMS****The CORR Procedure**

Gene\_Symbol=CST3

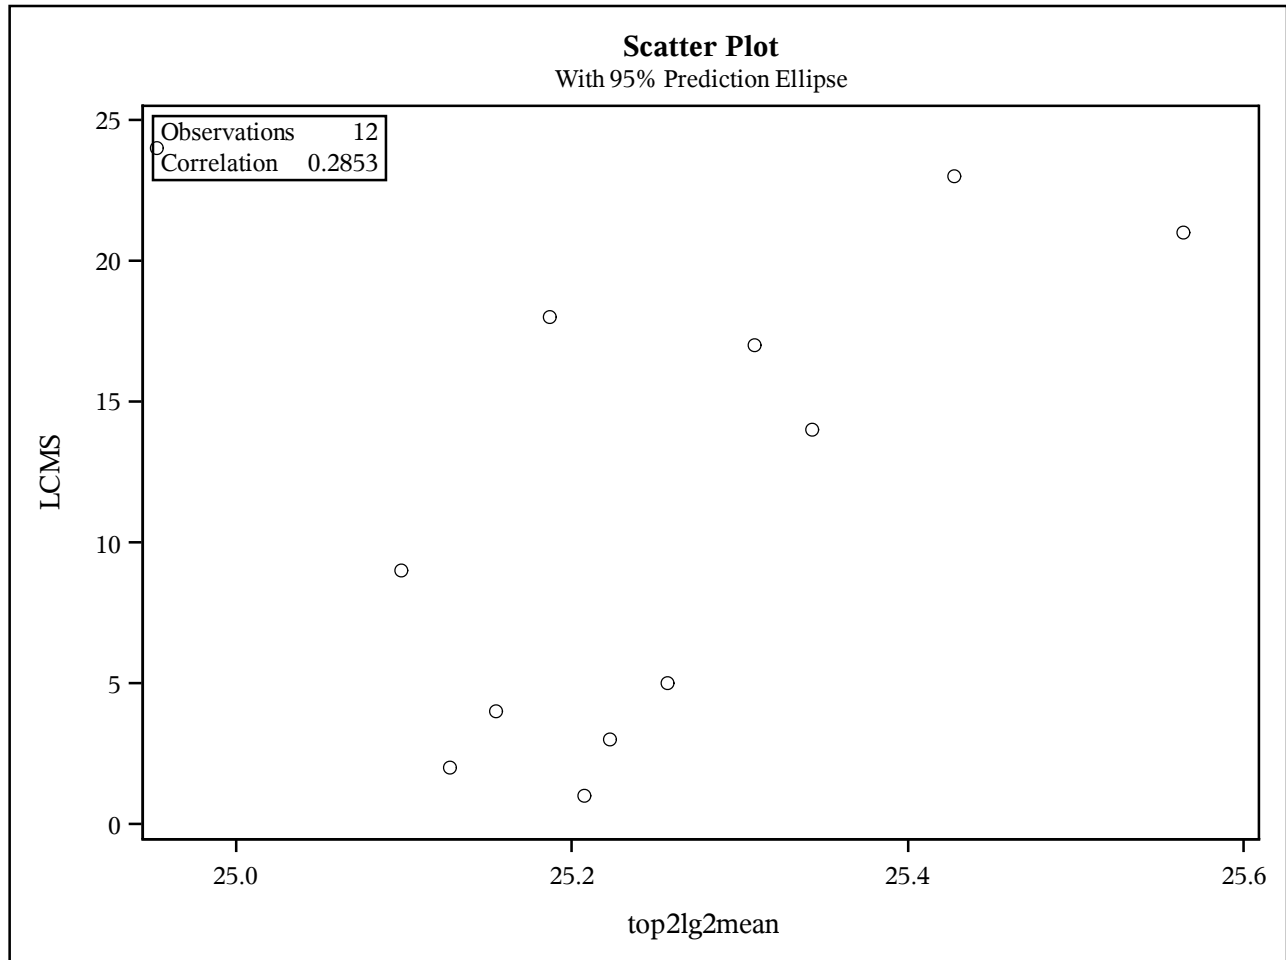

**Correlation C\_pooltop2lg2mean\_tp2 symbol LCMS****The CORR Procedure**

Gene\_Symbol=DKK3

2 Variables: top2lg2mean LCMS

| Simple Statistics |    |          |         |           |          |          |
|-------------------|----|----------|---------|-----------|----------|----------|
| Variable          | N  | Mean     | Std Dev | Sum       | Minimum  | Maximum  |
| top2lg2mean       | 12 | 20.10947 | 0.79286 | 241.31363 | 19.13980 | 21.78206 |
| LCMS              | 12 | 11.75000 | 8.70867 | 141.00000 | 1.00000  | 24.00000 |

| Pearson Correlation Coefficients, N = 12<br>Prob >  r  under H0: Rho=0 |                    |                    |
|------------------------------------------------------------------------|--------------------|--------------------|
|                                                                        | top2lg2mean        | LCMS               |
| top2lg2mean                                                            | 1.00000            | -0.50936<br>0.0908 |
| LCMS                                                                   | -0.50936<br>0.0908 | 1.00000            |

**Pearson Correlation Statistics (Fisher's z Transformation)**

| Variable    | With Variable | N  | Sample Correlation | Fisher's z | Bias Adjustment | Correlation Estimate | 95% Confidence Limits |          | p Value for H0:Rho=0 |
|-------------|---------------|----|--------------------|------------|-----------------|----------------------|-----------------------|----------|----------------------|
| top2lg2mean | LCMS          | 12 | -0.50936           | -0.56186   | -0.02315        | -0.49201             | -0.831207             | 0.114116 | 0.0919               |

**Correlation C\_pooltop2lg2mean\_tp2 symbol LCMS**

**The CORR Procedure**

Gene\_Symbol=DKK3

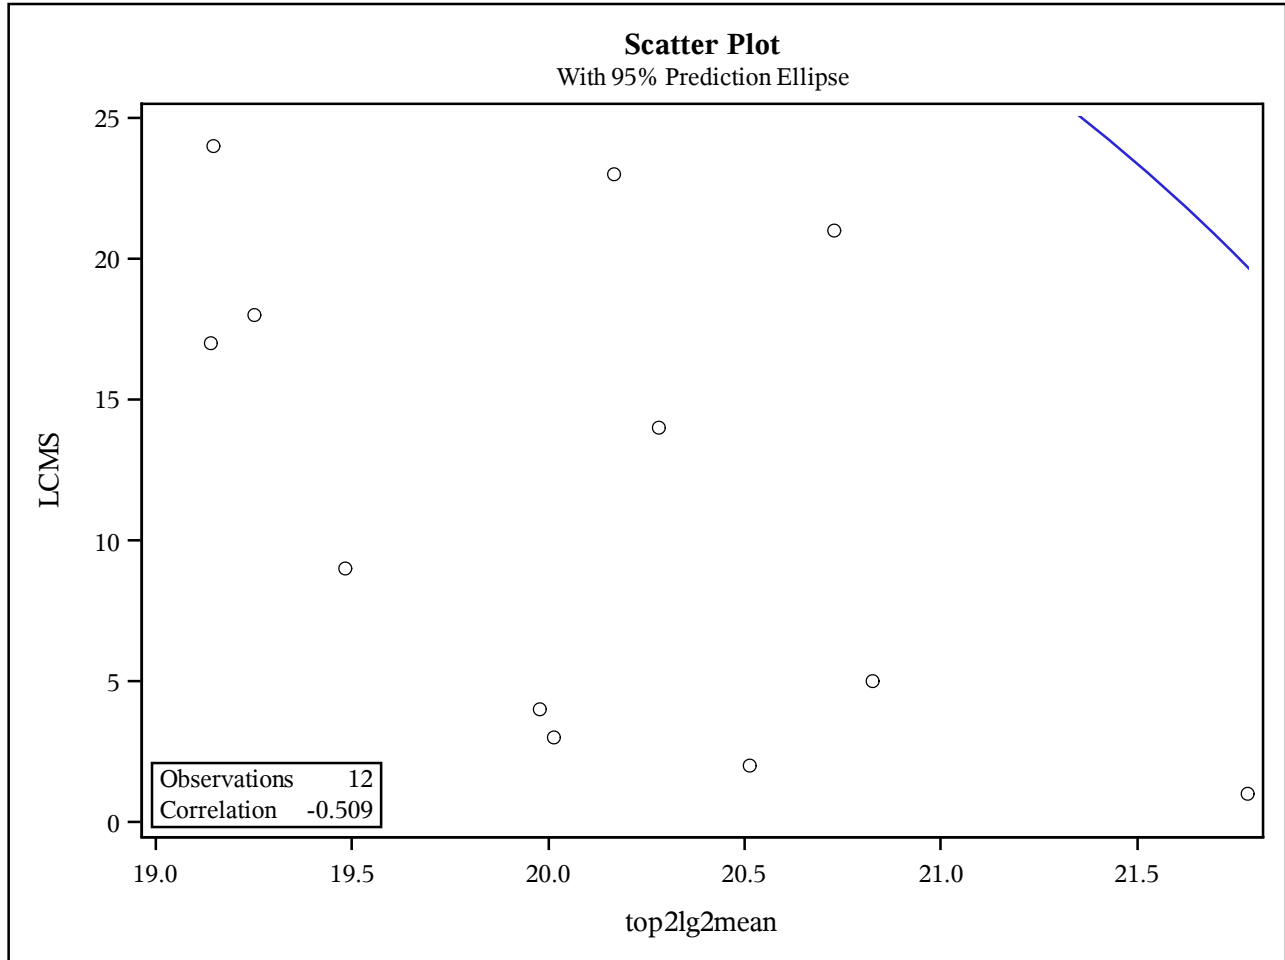

**Correlation C\_pooltop2lg2mean\_tp2 symbol LCMS****The CORR Procedure**

Gene\_Symbol=EFEMP1

2 Variables: top2lg2mean LCMS

| Simple Statistics |    |          |         |           |          |          |
|-------------------|----|----------|---------|-----------|----------|----------|
| Variable          | N  | Mean     | Std Dev | Sum       | Minimum  | Maximum  |
| top2lg2mean       | 12 | 20.60120 | 0.23123 | 247.21445 | 20.22609 | 21.07743 |
| LCMS              | 12 | 11.75000 | 8.70867 | 141.00000 | 1.00000  | 24.00000 |

| Pearson Correlation Coefficients, N = 12<br>Prob >  r  under H0: Rho=0 |                    |                    |
|------------------------------------------------------------------------|--------------------|--------------------|
|                                                                        | top2lg2mean        | LCMS               |
| top2lg2mean                                                            | 1.00000            | -0.16093<br>0.6173 |
| LCMS                                                                   | -0.16093<br>0.6173 | 1.00000            |

| Pearson Correlation Statistics (Fisher's z Transformation) |               |    |                    |            |                 |                      |                       |          |                      |
|------------------------------------------------------------|---------------|----|--------------------|------------|-----------------|----------------------|-----------------------|----------|----------------------|
| Variable                                                   | With Variable | N  | Sample Correlation | Fisher's z | Bias Adjustment | Correlation Estimate | 95% Confidence Limits |          | p Value for H0:Rho=0 |
| top2lg2mean                                                | LCMS          | 12 | -0.16093           | -0.16235   | -0.00732        | -0.15380             | -0.668680             | 0.460771 | 0.6262               |

**Correlation C\_pooltop2lg2mean\_tp2 symbol LCMS**

**The CORR Procedure**

**Gene\_Symbol=EFEMP1**

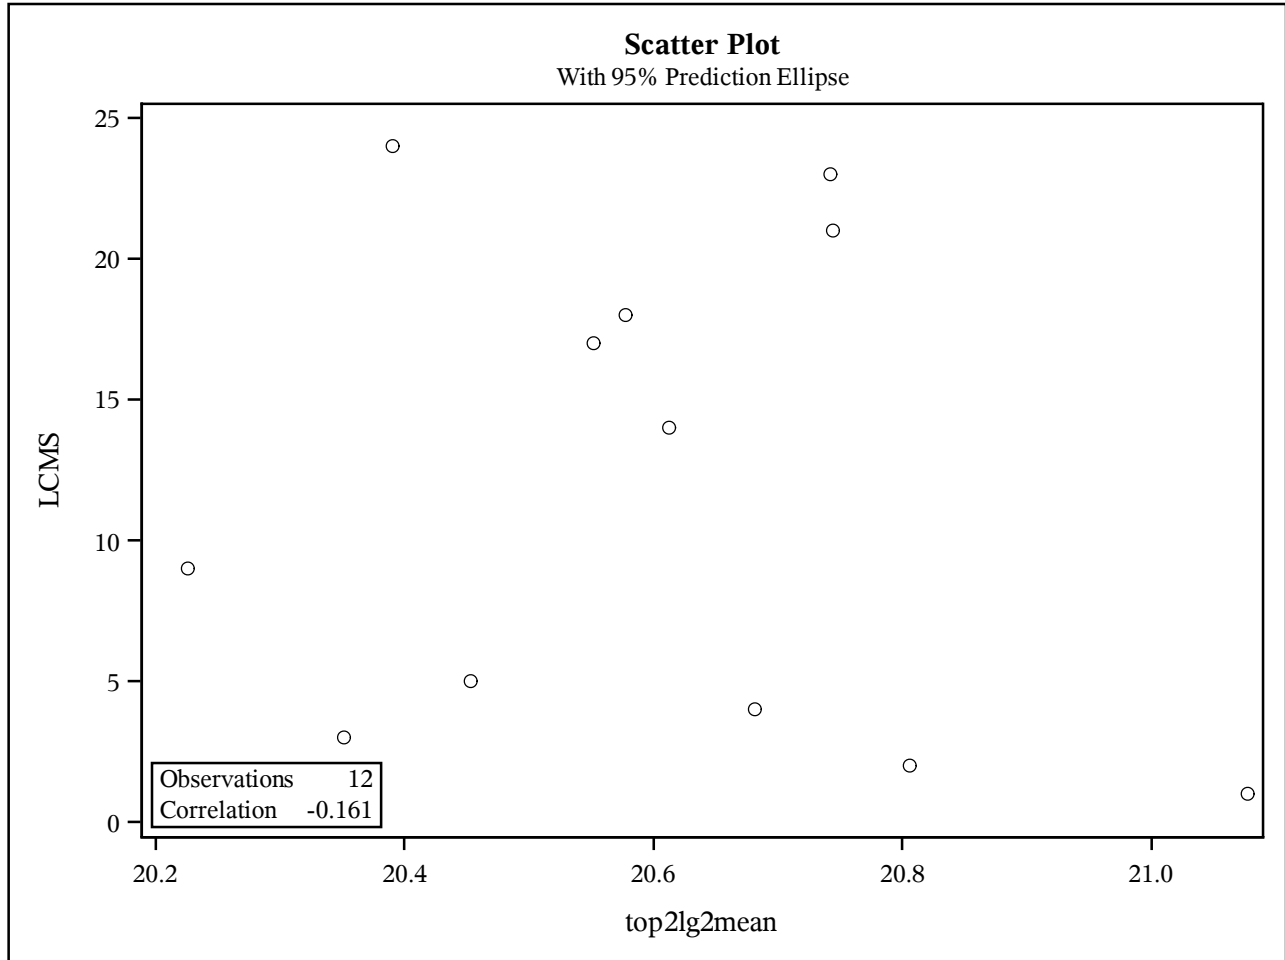



**Correlation C\_pooltop2lg2mean\_tp2 symbol LCMS****The CORR Procedure**

Gene\_Symbol=ENPP2

2 Variables: top2lg2mean LCMS

| Simple Statistics |    |          |         |           |          |          |
|-------------------|----|----------|---------|-----------|----------|----------|
| Variable          | N  | Mean     | Std Dev | Sum       | Minimum  | Maximum  |
| top2lg2mean       | 12 | 20.07433 | 0.89659 | 240.89194 | 18.69225 | 21.72345 |
| LCMS              | 12 | 11.75000 | 8.70867 | 141.00000 | 1.00000  | 24.00000 |

| Pearson Correlation Coefficients, N = 12<br>Prob >  r  under H0: Rho=0 |                    |                    |
|------------------------------------------------------------------------|--------------------|--------------------|
|                                                                        | top2lg2mean        | LCMS               |
| top2lg2mean                                                            | 1.00000            | -0.22714<br>0.4777 |
| LCMS                                                                   | -0.22714<br>0.4777 | 1.00000            |

| Pearson Correlation Statistics (Fisher's z Transformation) |               |    |                    |            |                 |                      |                       |          |                      |
|------------------------------------------------------------|---------------|----|--------------------|------------|-----------------|----------------------|-----------------------|----------|----------------------|
| Variable                                                   | With Variable | N  | Sample Correlation | Fisher's z | Bias Adjustment | Correlation Estimate | 95% Confidence Limits |          | p Value for H0:Rho=0 |
| top2lg2mean                                                | LCMS          | 12 | -0.22714           | -0.23117   | -0.01032        | -0.21732             | -0.703485             | 0.407389 | 0.4880               |

**Correlation C\_pooltop2lg2mean\_tp2 symbol LCMS**

**The CORR Procedure**

Gene\_Symbol=ENPP2

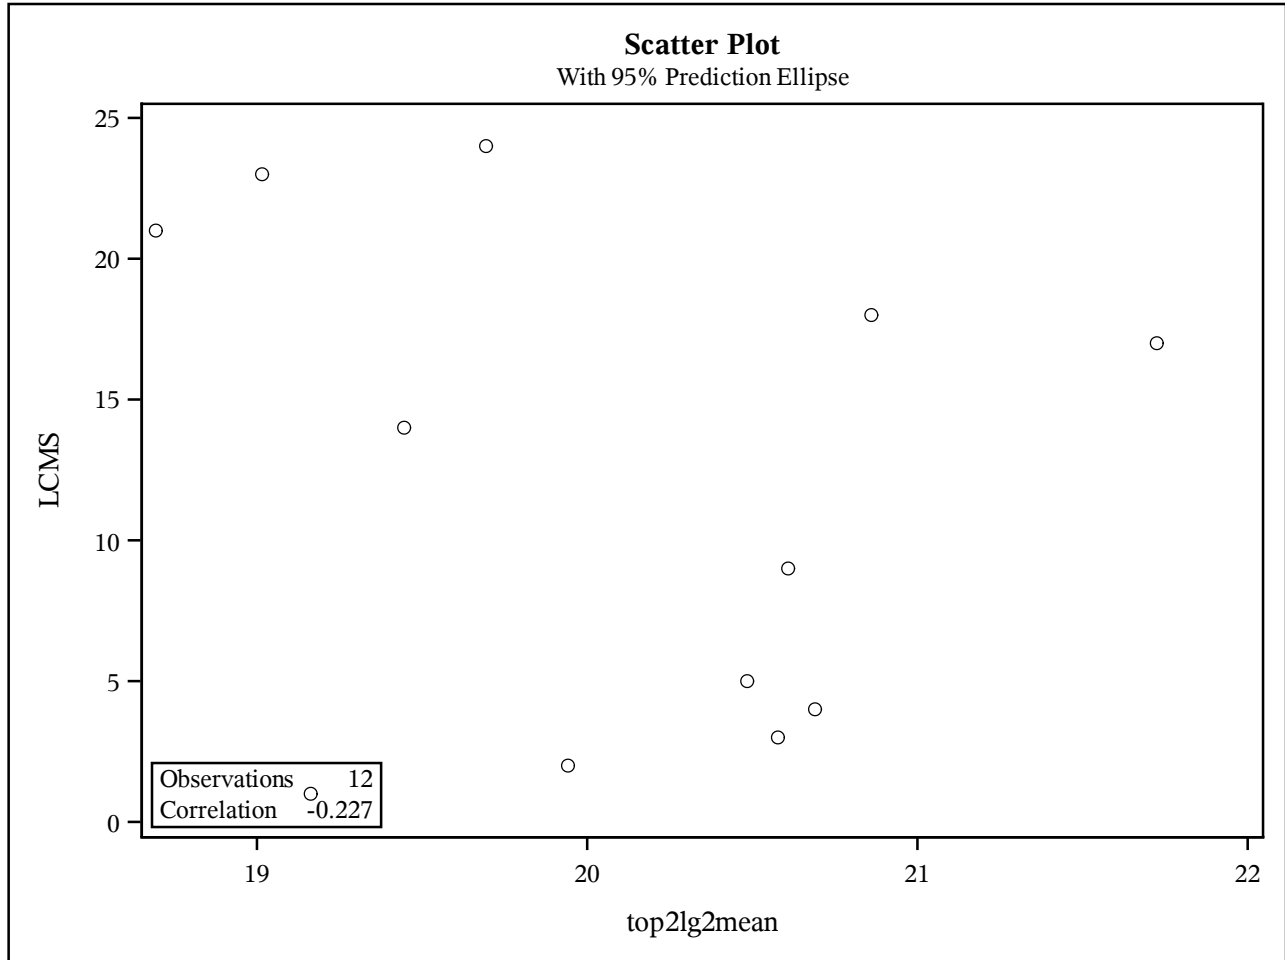

**Correlation C\_pooltop2lg2mean\_tp2 symbol LCMS****The CORR Procedure**

Gene\_Symbol=F2

2 Variables: top2lg2mean LCMS

| Simple Statistics |    |          |         |           |          |          |
|-------------------|----|----------|---------|-----------|----------|----------|
| Variable          | N  | Mean     | Std Dev | Sum       | Minimum  | Maximum  |
| top2lg2mean       | 12 | 19.93872 | 0.47286 | 239.26468 | 19.14113 | 20.64381 |
| LCMS              | 12 | 11.75000 | 8.70867 | 141.00000 | 1.00000  | 24.00000 |

| Pearson Correlation Coefficients, N = 12<br>Prob >  r  under H0: Rho=0 |                   |                   |
|------------------------------------------------------------------------|-------------------|-------------------|
|                                                                        | top2lg2mean       | LCMS              |
| top2lg2mean                                                            | 1.00000           | 0.37395<br>0.2311 |
| LCMS                                                                   | 0.37395<br>0.2311 | 1.00000           |

| Pearson Correlation Statistics (Fisher's z Transformation) |               |    |                    |            |                 |                      |                       |          |                      |
|------------------------------------------------------------|---------------|----|--------------------|------------|-----------------|----------------------|-----------------------|----------|----------------------|
| Variable                                                   | With Variable | N  | Sample Correlation | Fisher's z | Bias Adjustment | Correlation Estimate | 95% Confidence Limits |          | p Value for H0:Rho=0 |
| top2lg2mean                                                | LCMS          | 12 | 0.37395            | 0.39301    | 0.01700         | 0.35924              | -0.270412             | 0.773641 | 0.2384               |

**Correlation C\_pooltop2lg2mean\_tp2 symbol LCMS**

**The CORR Procedure**

Gene\_Symbol=F2

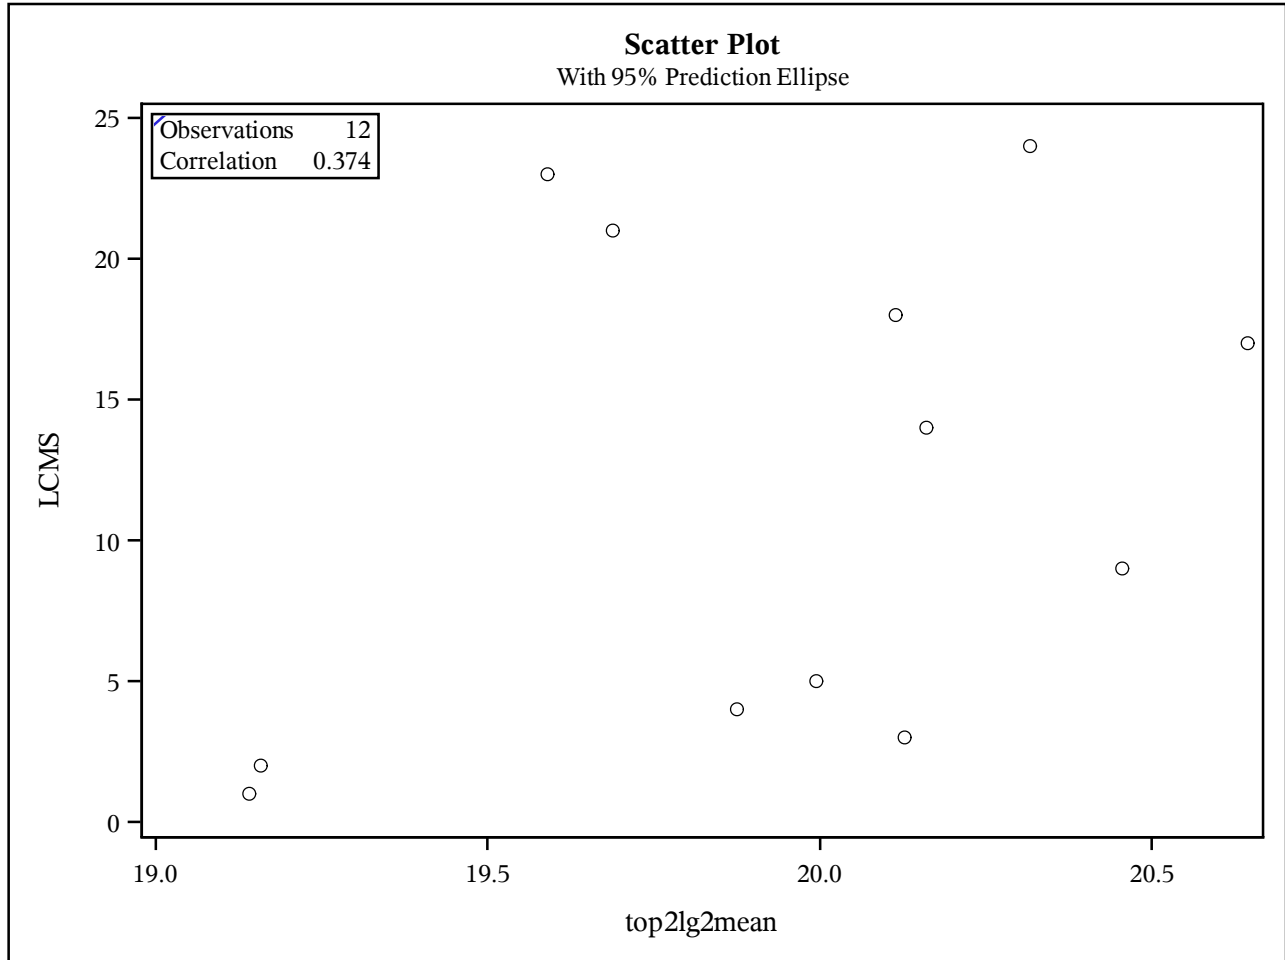

**Correlation C\_pooltop2lg2mean\_tp2 symbol LCMS****The CORR Procedure**

Gene\_Symbol=FBLN1

2 Variables: top2lg2mean LCMS

| Simple Statistics |    |          |         |           |          |          |
|-------------------|----|----------|---------|-----------|----------|----------|
| Variable          | N  | Mean     | Std Dev | Sum       | Minimum  | Maximum  |
| top2lg2mean       | 12 | 21.28993 | 0.21031 | 255.47919 | 20.90053 | 21.60484 |
| LCMS              | 12 | 11.75000 | 8.70867 | 141.00000 | 1.00000  | 24.00000 |

| Pearson Correlation Coefficients, N = 12<br>Prob >  r  under H0: Rho=0 |                   |                   |
|------------------------------------------------------------------------|-------------------|-------------------|
|                                                                        | top2lg2mean       | LCMS              |
| top2lg2mean                                                            | 1.00000           | 0.69212<br>0.0126 |
| LCMS                                                                   | 0.69212<br>0.0126 | 1.00000           |

**Pearson Correlation Statistics (Fisher's z Transformation)**

| Variable    | With Variable | N  | Sample Correlation | Fisher's z | Bias Adjustment | Correlation Estimate | 95% Confidence Limits |          | p Value for H0:Rho=0 |
|-------------|---------------|----|--------------------|------------|-----------------|----------------------|-----------------------|----------|----------------------|
| top2lg2mean | LCMS          | 12 | 0.69212            | 0.85202    | 0.03146         | 0.67538              | 0.165699              | 0.900316 | 0.0106               |

**Correlation C\_pooltop2lg2mean\_tp2 symbol LCMS**

**The CORR Procedure**

Gene\_Symbol=FBLN1

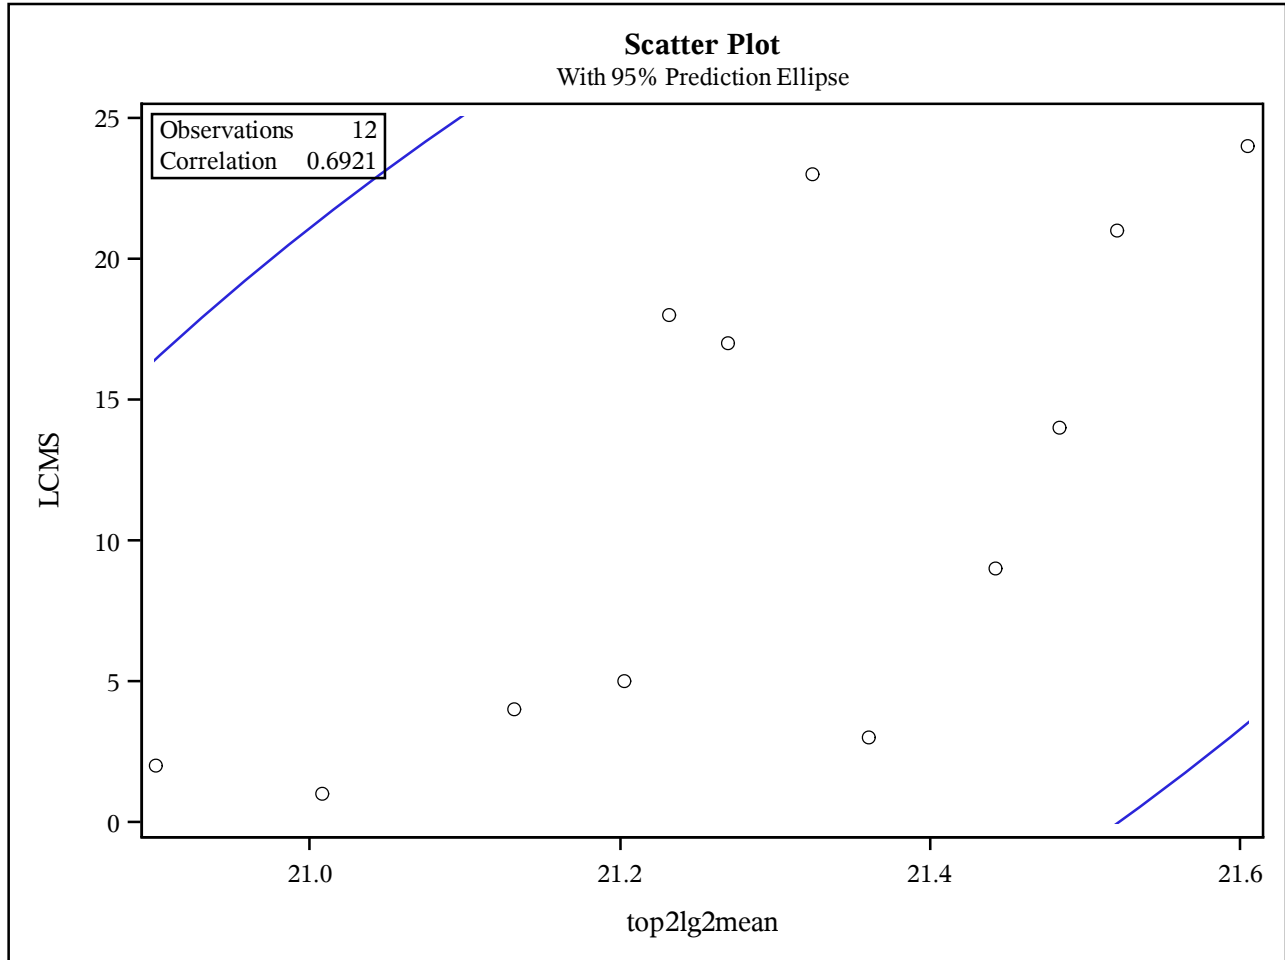

**Correlation C\_pooltop2lg2mean\_tp2 symbol LCMS****The CORR Procedure**

Gene\_Symbol=FGG

2 Variables: top2lg2mean LCMS

| Simple Statistics |    |          |         |           |          |          |
|-------------------|----|----------|---------|-----------|----------|----------|
| Variable          | N  | Mean     | Std Dev | Sum       | Minimum  | Maximum  |
| top2lg2mean       | 12 | 17.97301 | 0.39551 | 215.67613 | 17.49951 | 19.09702 |
| LCMS              | 12 | 11.75000 | 8.70867 | 141.00000 | 1.00000  | 24.00000 |

| Pearson Correlation Coefficients, N = 12<br>Prob >  r  under H0: Rho=0 |                   |                   |
|------------------------------------------------------------------------|-------------------|-------------------|
|                                                                        | top2lg2mean       | LCMS              |
| top2lg2mean                                                            | 1.00000           | 0.02584<br>0.9365 |
| LCMS                                                                   | 0.02584<br>0.9365 | 1.00000           |

**Pearson Correlation Statistics (Fisher's z Transformation)**

| Variable    | With Variable | N  | Sample Correlation | Fisher's z | Bias Adjustment | Correlation Estimate | 95% Confidence Limits |          | p Value for H0:Rho=0 |
|-------------|---------------|----|--------------------|------------|-----------------|----------------------|-----------------------|----------|----------------------|
| top2lg2mean | LCMS          | 12 | 0.02584            | 0.02585    | 0.00117         | 0.02467              | -0.557122             | 0.590213 | 0.9382               |

**Correlation C\_pooltop2lg2mean\_tp2 symbol LCMS**

**The CORR Procedure**

Gene\_Symbol=FGG

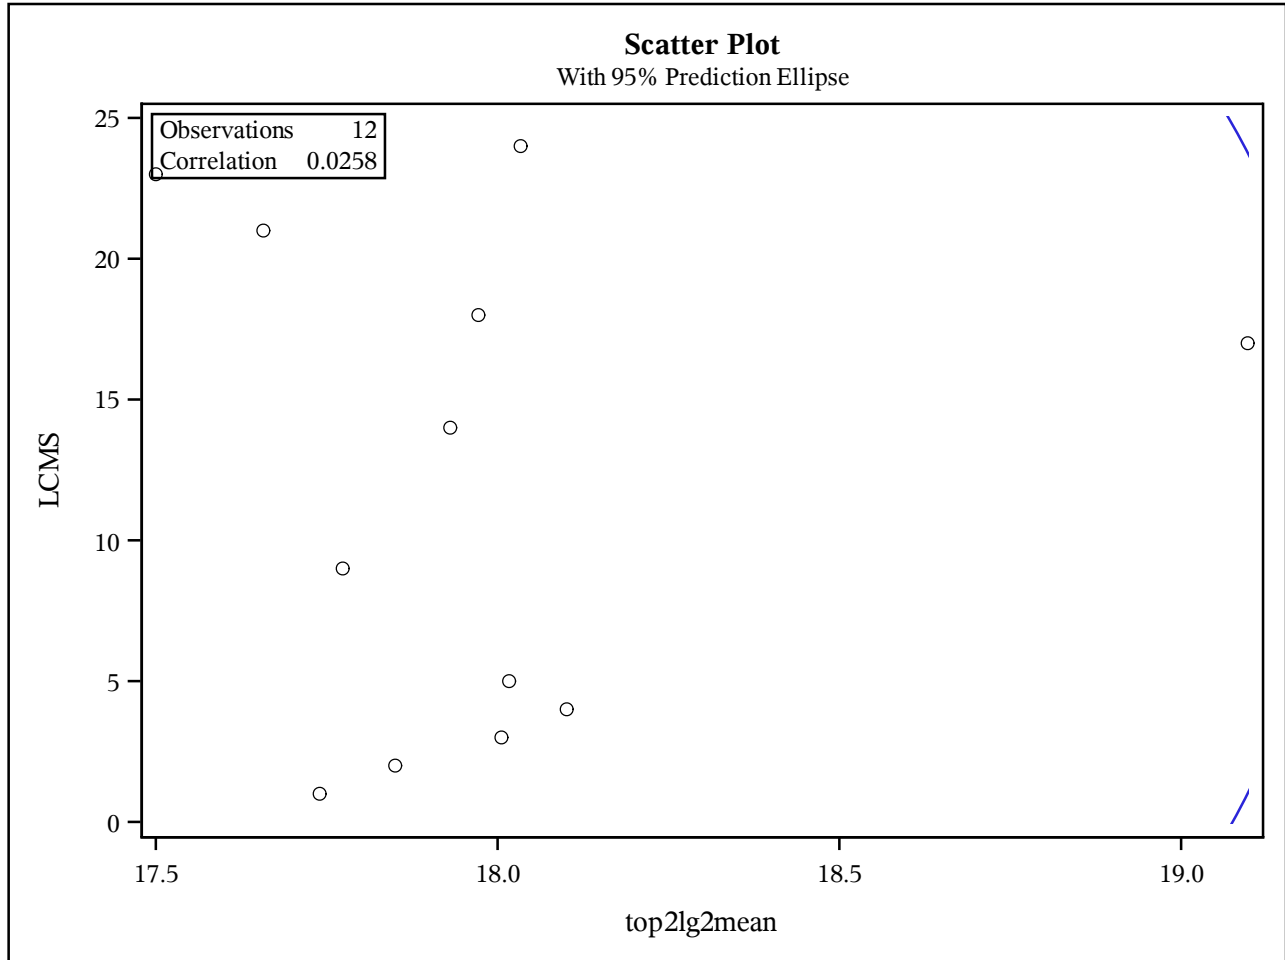



**Correlation C\_pooltop2lg2mean\_tp2 symbol LCMS****The CORR Procedure**

Gene\_Symbol=FN1

2 Variables: top2lg2mean LCMS

| Simple Statistics |    |          |         |           |          |          |
|-------------------|----|----------|---------|-----------|----------|----------|
| Variable          | N  | Mean     | Std Dev | Sum       | Minimum  | Maximum  |
| top2lg2mean       | 12 | 20.22242 | 0.38957 | 242.66899 | 19.48613 | 20.90945 |
| LCMS              | 12 | 11.75000 | 8.70867 | 141.00000 | 1.00000  | 24.00000 |

| Pearson Correlation Coefficients, N = 12<br>Prob >  r  under H0: Rho=0 |                   |                   |
|------------------------------------------------------------------------|-------------------|-------------------|
|                                                                        | top2lg2mean       | LCMS              |
| top2lg2mean                                                            | 1.00000           | 0.15107<br>0.6393 |
| LCMS                                                                   | 0.15107<br>0.6393 | 1.00000           |

| Pearson Correlation Statistics (Fisher's z Transformation) |               |    |                    |            |                 |                      |                       |          |                      |
|------------------------------------------------------------|---------------|----|--------------------|------------|-----------------|----------------------|-----------------------|----------|----------------------|
| Variable                                                   | With Variable | N  | Sample Correlation | Fisher's z | Bias Adjustment | Correlation Estimate | 95% Confidence Limits |          | p Value for H0:Rho=0 |
| top2lg2mean                                                | LCMS          | 12 | 0.15107            | 0.15223    | 0.00687         | 0.14435              | -0.468349             | 0.663303 | 0.6479               |

**Correlation C\_pooltop2lg2mean\_tp2 symbol LCMS****The CORR Procedure**

Gene\_Symbol=FN1

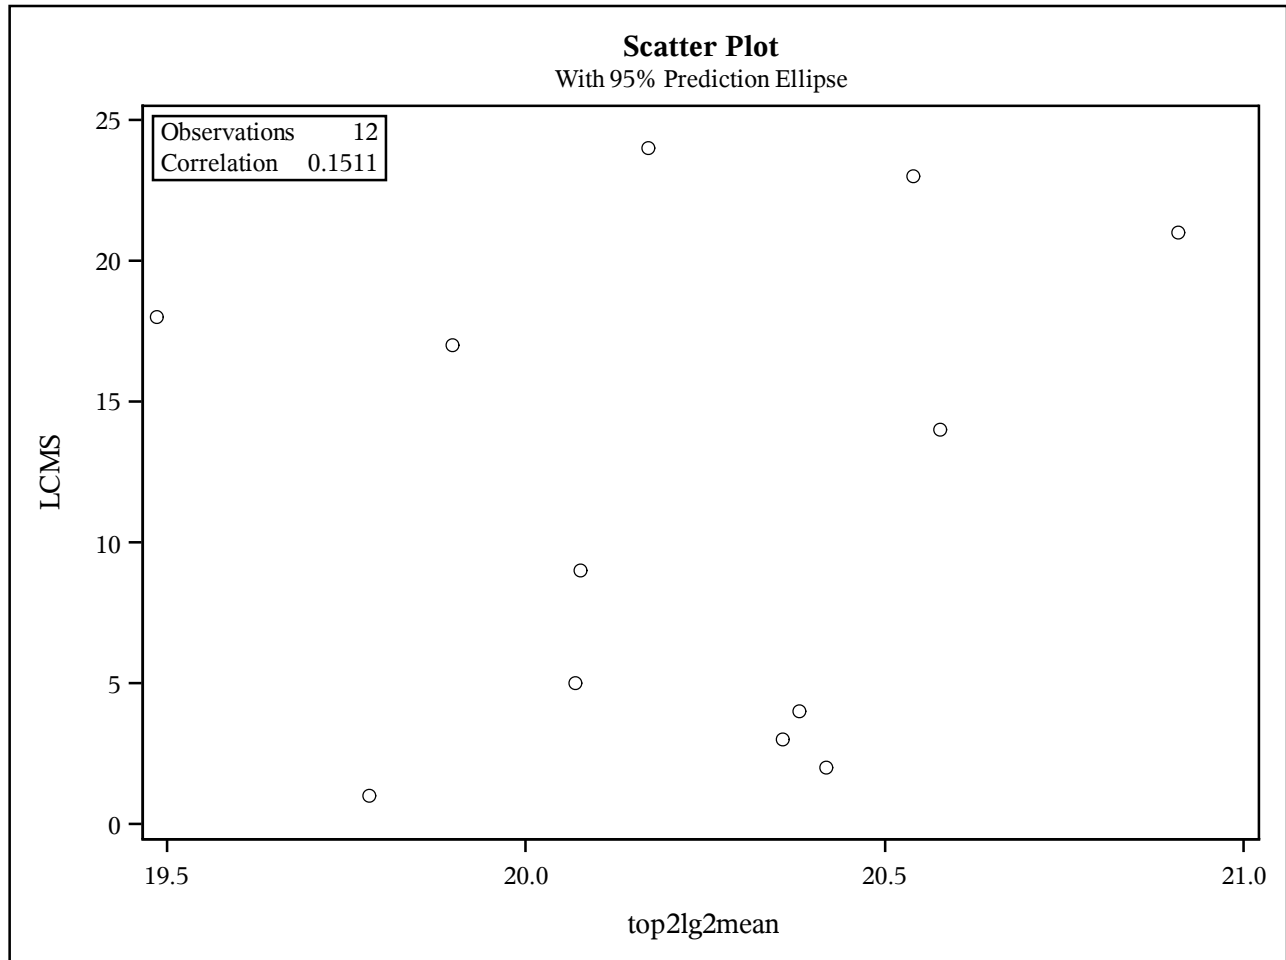

**Correlation C\_pooltop2lg2mean\_tp2 symbol LCMS****The CORR Procedure**

Gene\_Symbol=GC

2 Variables: top2lg2mean LCMS

| Simple Statistics |    |          |         |           |          |          |
|-------------------|----|----------|---------|-----------|----------|----------|
| Variable          | N  | Mean     | Std Dev | Sum       | Minimum  | Maximum  |
| top2lg2mean       | 12 | 23.33209 | 0.20100 | 279.98510 | 22.82401 | 23.60913 |
| LCMS              | 12 | 11.75000 | 8.70867 | 141.00000 | 1.00000  | 24.00000 |

| Pearson Correlation Coefficients, N = 12<br>Prob >  r  under H0: Rho=0 |                   |                   |
|------------------------------------------------------------------------|-------------------|-------------------|
|                                                                        | top2lg2mean       | LCMS              |
| top2lg2mean                                                            | 1.00000           | 0.68711<br>0.0136 |
| LCMS                                                                   | 0.68711<br>0.0136 | 1.00000           |

**Pearson Correlation Statistics (Fisher's z Transformation)**

| Variable    | With Variable | N  | Sample Correlation | Fisher's z | Bias Adjustment | Correlation Estimate | 95% Confidence Limits |          | p Value for H0:Rho=0 |
|-------------|---------------|----|--------------------|------------|-----------------|----------------------|-----------------------|----------|----------------------|
| top2lg2mean | LCMS          | 12 | 0.68711            | 0.84246    | 0.03123         | 0.67027              | 0.156604              | 0.898532 | 0.0115               |

**Correlation C\_pooltop2lg2mean\_tp2 symbol LCMS**

**The CORR Procedure**

Gene\_Symbol=GC

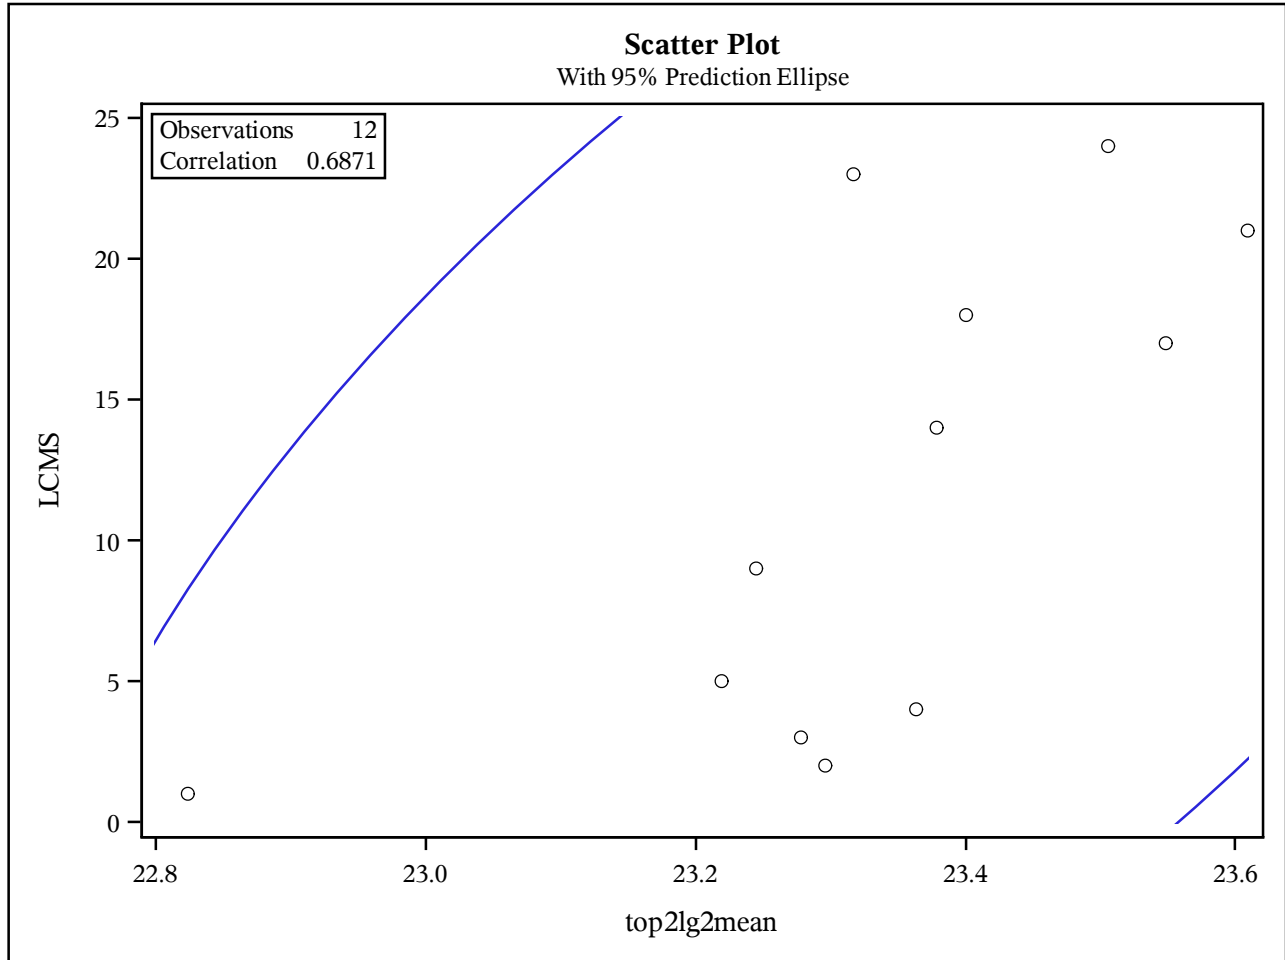

**Correlation C\_pooltop2lg2mean\_tp2 symbol LCMS****The CORR Procedure**

Gene\_Symbol=GSN

2 Variables: top2lg2mean LCMS

| Simple Statistics |    |          |         |           |          |          |
|-------------------|----|----------|---------|-----------|----------|----------|
| Variable          | N  | Mean     | Std Dev | Sum       | Minimum  | Maximum  |
| top2lg2mean       | 12 | 21.67081 | 0.34197 | 260.04974 | 20.77562 | 21.98326 |
| LCMS              | 12 | 11.75000 | 8.70867 | 141.00000 | 1.00000  | 24.00000 |

| Pearson Correlation Coefficients, N = 12<br>Prob >  r  under H0: Rho=0 |                   |                   |
|------------------------------------------------------------------------|-------------------|-------------------|
|                                                                        | top2lg2mean       | LCMS              |
| top2lg2mean                                                            | 1.00000           | 0.43011<br>0.1628 |
| LCMS                                                                   | 0.43011<br>0.1628 | 1.00000           |

**Pearson Correlation Statistics (Fisher's z Transformation)**

| Variable    | With Variable | N  | Sample Correlation | Fisher's z | Bias Adjustment | Correlation Estimate | 95% Confidence Limits |          | p Value for H0:Rho=0 |
|-------------|---------------|----|--------------------|------------|-----------------|----------------------|-----------------------|----------|----------------------|
| top2lg2mean | LCMS          | 12 | 0.43011            | 0.46003    | 0.01955         | 0.41404              | -0.209682             | 0.798263 | 0.1676               |

**Correlation C\_pooltop2lg2mean\_tp2 symbol LCMS**

**The CORR Procedure**

Gene\_Symbol=GSN

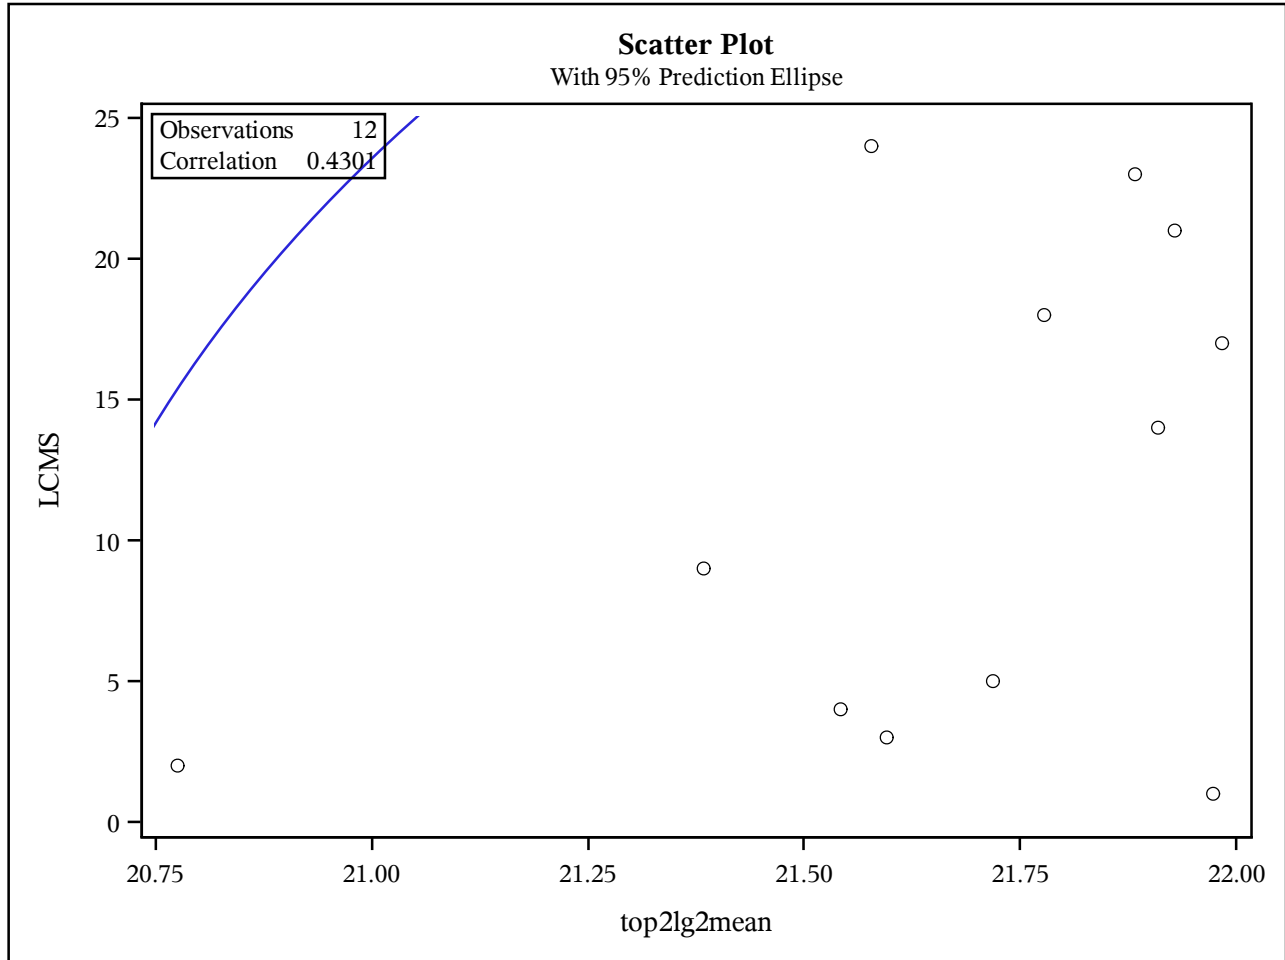

**Correlation C\_pooltop2lg2mean\_tp2 symbol LCMS****The CORR Procedure**

Gene\_Symbol=HPX

2 Variables: top2lg2mean LCMS

| Simple Statistics |    |          |         |           |          |          |
|-------------------|----|----------|---------|-----------|----------|----------|
| Variable          | N  | Mean     | Std Dev | Sum       | Minimum  | Maximum  |
| top2lg2mean       | 12 | 25.81965 | 0.13873 | 309.83584 | 25.65299 | 26.07131 |
| LCMS              | 12 | 11.75000 | 8.70867 | 141.00000 | 1.00000  | 24.00000 |

| Pearson Correlation Coefficients, N = 12<br>Prob >  r  under H0: Rho=0 |                   |                   |
|------------------------------------------------------------------------|-------------------|-------------------|
|                                                                        | top2lg2mean       | LCMS              |
| top2lg2mean                                                            | 1.00000           | 0.56920<br>0.0534 |
| LCMS                                                                   | 0.56920<br>0.0534 | 1.00000           |

**Pearson Correlation Statistics (Fisher's z Transformation)**

| Variable    | With Variable | N  | Sample Correlation | Fisher's z | Bias Adjustment | Correlation Estimate | 95% Confidence Limits |          | p Value for H0:Rho=0 |
|-------------|---------------|----|--------------------|------------|-----------------|----------------------|-----------------------|----------|----------------------|
| top2lg2mean | LCMS          | 12 | 0.56920            | 0.64633    | 0.02587         | 0.55145              | -0.032850             | 0.854819 | 0.0525               |

**Correlation C\_pooltop2lg2mean\_tp2 symbol LCMS****The CORR Procedure**

Gene\_Symbol=HPX

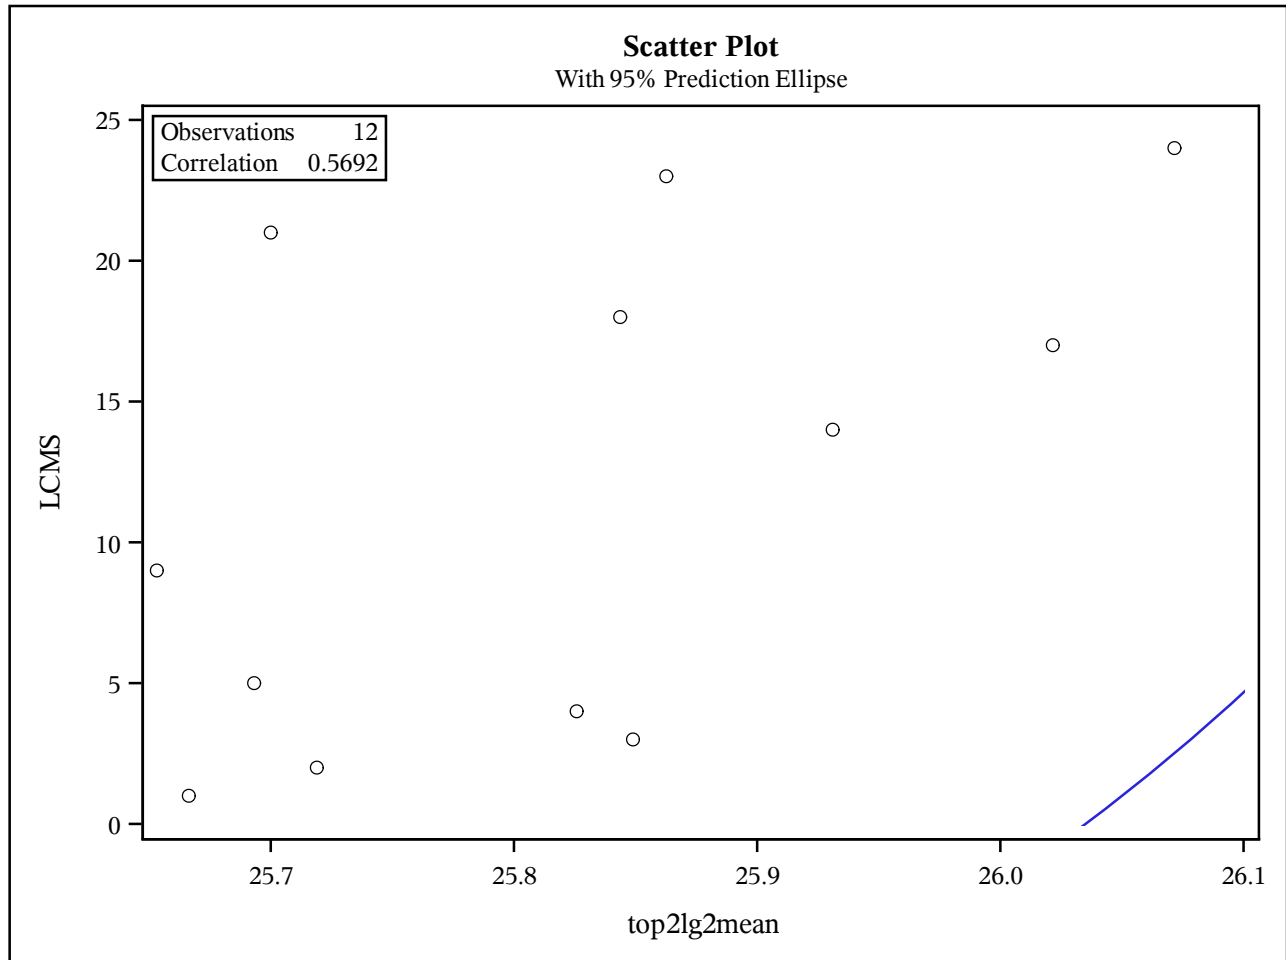



**Correlation C\_pooltop2lg2mean\_tp2 symbol LCMS****The CORR Procedure**

Gene\_Symbol=IGFBP6

2 Variables: top2lg2mean LCMS

| Simple Statistics |    |          |         |           |          |          |
|-------------------|----|----------|---------|-----------|----------|----------|
| Variable          | N  | Mean     | Std Dev | Sum       | Minimum  | Maximum  |
| top2lg2mean       | 12 | 21.76537 | 0.24356 | 261.18448 | 21.06331 | 22.01586 |
| LCMS              | 12 | 11.75000 | 8.70867 | 141.00000 | 1.00000  | 24.00000 |

| Pearson Correlation Coefficients, N = 12<br>Prob >  r  under H0: Rho=0 |                   |                   |
|------------------------------------------------------------------------|-------------------|-------------------|
|                                                                        | top2lg2mean       | LCMS              |
| top2lg2mean                                                            | 1.00000           | 0.64233<br>0.0243 |
| LCMS                                                                   | 0.64233<br>0.0243 | 1.00000           |

**Pearson Correlation Statistics (Fisher's z Transformation)**

| Variable    | With Variable | N  | Sample Correlation | Fisher's z | Bias Adjustment | Correlation Estimate | 95% Confidence Limits |          | p Value for H0:Rho=0 |
|-------------|---------------|----|--------------------|------------|-----------------|----------------------|-----------------------|----------|----------------------|
| top2lg2mean | LCMS          | 12 | 0.64233            | 0.76214    | 0.02920         | 0.62486              | 0.079450              | 0.882346 | 0.0222               |

**Correlation C\_pooltop2lg2mean\_tp2 symbol LCMS**

**The CORR Procedure**

Gene\_Symbol=IGFBP6

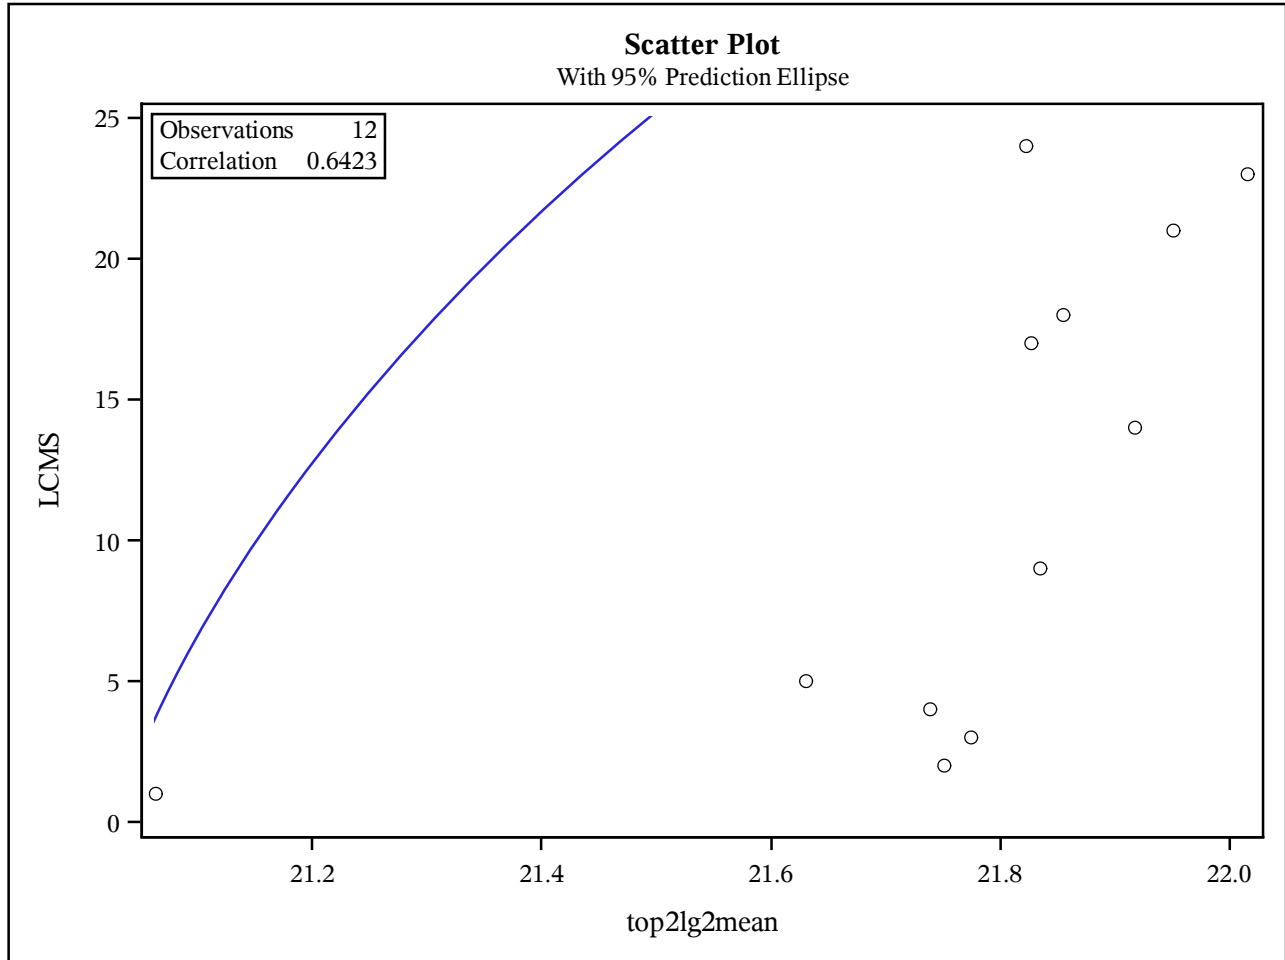

**Correlation C\_pooltop2lg2mean\_tp2 symbol LCMS****The CORR Procedure**

Gene\_Symbol=KLK6

2 Variables: top2lg2mean LCMS

| Simple Statistics |    |          |         |           |          |          |
|-------------------|----|----------|---------|-----------|----------|----------|
| Variable          | N  | Mean     | Std Dev | Sum       | Minimum  | Maximum  |
| top2lg2mean       | 12 | 23.33664 | 0.20344 | 280.03972 | 23.06448 | 23.67569 |
| LCMS              | 12 | 11.75000 | 8.70867 | 141.00000 | 1.00000  | 24.00000 |

| Pearson Correlation Coefficients, N = 12<br>Prob >  r  under H0: Rho=0 |                   |                   |
|------------------------------------------------------------------------|-------------------|-------------------|
|                                                                        | top2lg2mean       | LCMS              |
| top2lg2mean                                                            | 1.00000           | 0.34271<br>0.2755 |
| LCMS                                                                   | 0.34271<br>0.2755 | 1.00000           |

**Pearson Correlation Statistics (Fisher's z Transformation)**

| Variable    | With Variable | N  | Sample Correlation | Fisher's z | Bias Adjustment | Correlation Estimate | 95% Confidence Limits |          | p Value for H0:Rho=0 |
|-------------|---------------|----|--------------------|------------|-----------------|----------------------|-----------------------|----------|----------------------|
| top2lg2mean | LCMS          | 12 | 0.34271            | 0.35716    | 0.01558         | 0.32889              | -0.302019             | 0.759445 | 0.2840               |

**Correlation C\_pooltop2lg2mean\_tp2 symbol LCMS**

**The CORR Procedure**

Gene\_Symbol=KLK6

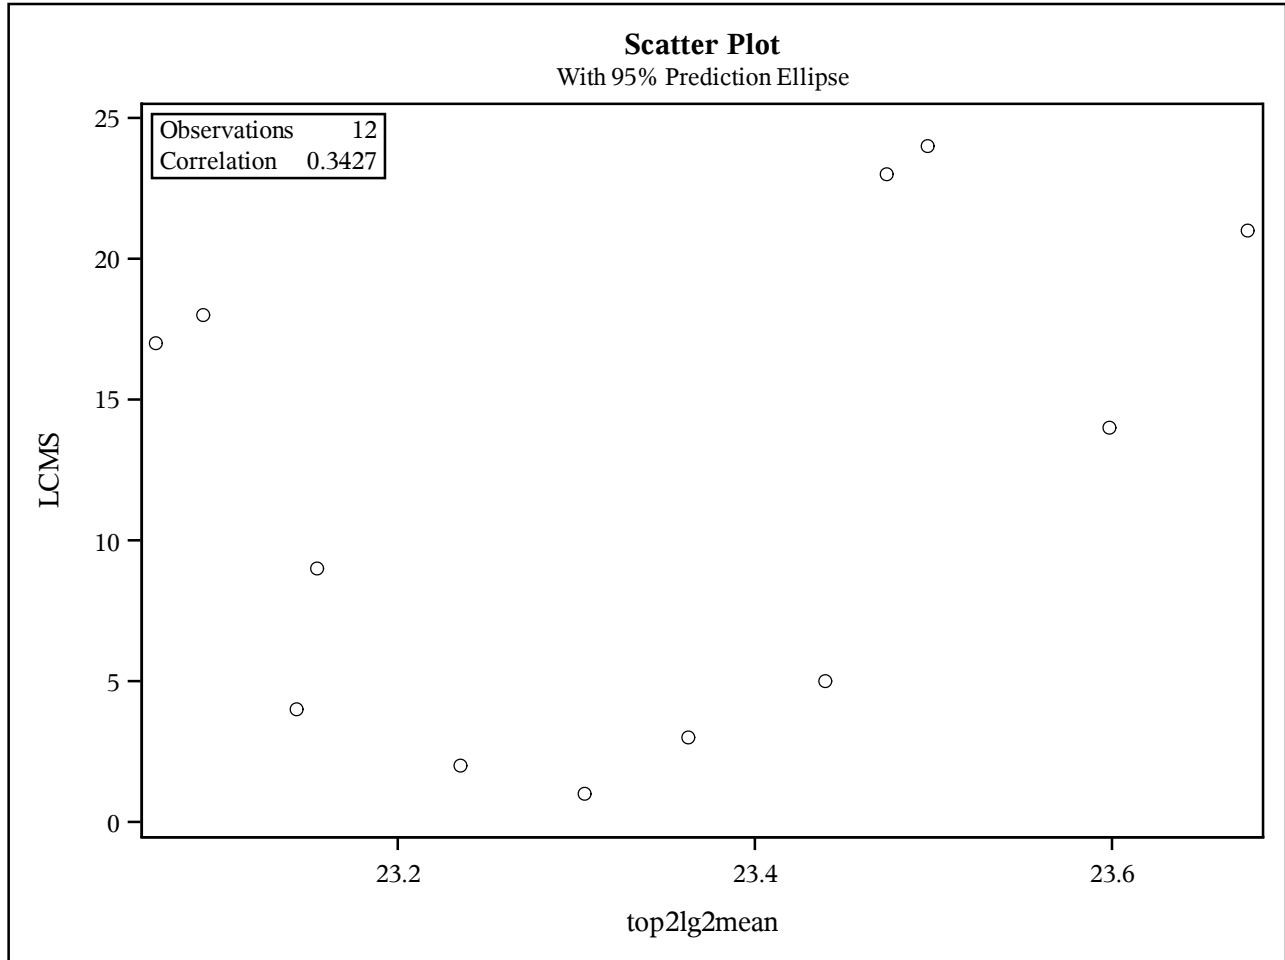

**Correlation C\_pooltop2lg2mean\_tp2 symbol LCMS****The CORR Procedure**

Gene\_Symbol=KNG1

2 Variables: top2lg2mean LCMS

| Simple Statistics |    |          |         |           |          |          |
|-------------------|----|----------|---------|-----------|----------|----------|
| Variable          | N  | Mean     | Std Dev | Sum       | Minimum  | Maximum  |
| top2lg2mean       | 12 | 19.99606 | 0.33916 | 239.95268 | 19.18894 | 20.32536 |
| LCMS              | 12 | 11.75000 | 8.70867 | 141.00000 | 1.00000  | 24.00000 |

| Pearson Correlation Coefficients, N = 12<br>Prob >  r  under H0: Rho=0 |                   |                   |
|------------------------------------------------------------------------|-------------------|-------------------|
|                                                                        | top2lg2mean       | LCMS              |
| top2lg2mean                                                            | 1.00000           | 0.55526<br>0.0609 |
| LCMS                                                                   | 0.55526<br>0.0609 | 1.00000           |

| Pearson Correlation Statistics (Fisher's z Transformation) |               |    |                    |            |                 |                      |                       |          |                      |
|------------------------------------------------------------|---------------|----|--------------------|------------|-----------------|----------------------|-----------------------|----------|----------------------|
| Variable                                                   | With Variable | N  | Sample Correlation | Fisher's z | Bias Adjustment | Correlation Estimate | 95% Confidence Limits |          | p Value for H0:Rho=0 |
| top2lg2mean                                                | LCMS          | 12 | 0.55526            | 0.62596    | 0.02524         | 0.53756              | -0.052555             | 0.849412 | 0.0604               |

**Correlation C\_pooltop2lg2mean\_tp2 symbol LCMS**

**The CORR Procedure**

Gene\_Symbol=KNG1

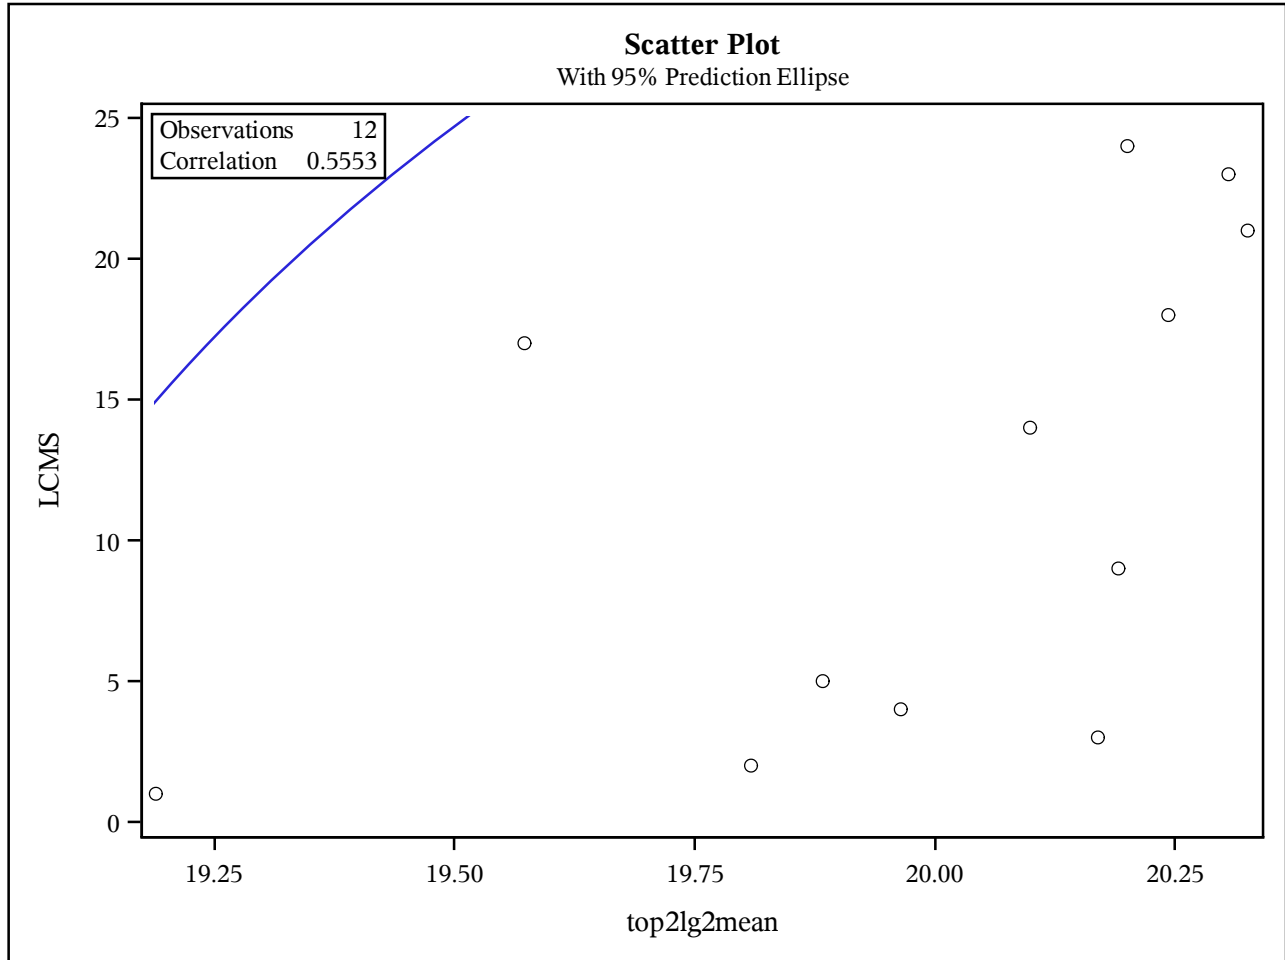

**Correlation C\_pooltop2lg2mean\_tp2 symbol LCMS****The CORR Procedure**

Gene\_Symbol=LGALS3BP

2 Variables: top2lg2mean LCMS

| Simple Statistics |    |          |         |           |          |          |
|-------------------|----|----------|---------|-----------|----------|----------|
| Variable          | N  | Mean     | Std Dev | Sum       | Minimum  | Maximum  |
| top2lg2mean       | 12 | 19.05697 | 0.50398 | 228.68362 | 18.42866 | 19.85145 |
| LCMS              | 12 | 11.75000 | 8.70867 | 141.00000 | 1.00000  | 24.00000 |

| Pearson Correlation Coefficients, N = 12<br>Prob >  r  under H0: Rho=0 |                    |                    |
|------------------------------------------------------------------------|--------------------|--------------------|
|                                                                        | top2lg2mean        | LCMS               |
| top2lg2mean                                                            | 1.00000            | -0.04641<br>0.8861 |
| LCMS                                                                   | -0.04641<br>0.8861 | 1.00000            |

| Pearson Correlation Statistics (Fisher's z Transformation) |               |    |                    |            |                 |                      |                       |          |                      |
|------------------------------------------------------------|---------------|----|--------------------|------------|-----------------|----------------------|-----------------------|----------|----------------------|
| Variable                                                   | With Variable | N  | Sample Correlation | Fisher's z | Bias Adjustment | Correlation Estimate | 95% Confidence Limits |          | p Value for H0:Rho=0 |
| top2lg2mean                                                | LCMS          | 12 | -0.04641           | -0.04645   | -0.00211        | -0.04431             | -0.602879             | 0.543412 | 0.8892               |

**Correlation C\_pooltop2lg2mean\_tp2 symbol LCMS**

**The CORR Procedure**

Gene\_Symbol=LGALS3BP

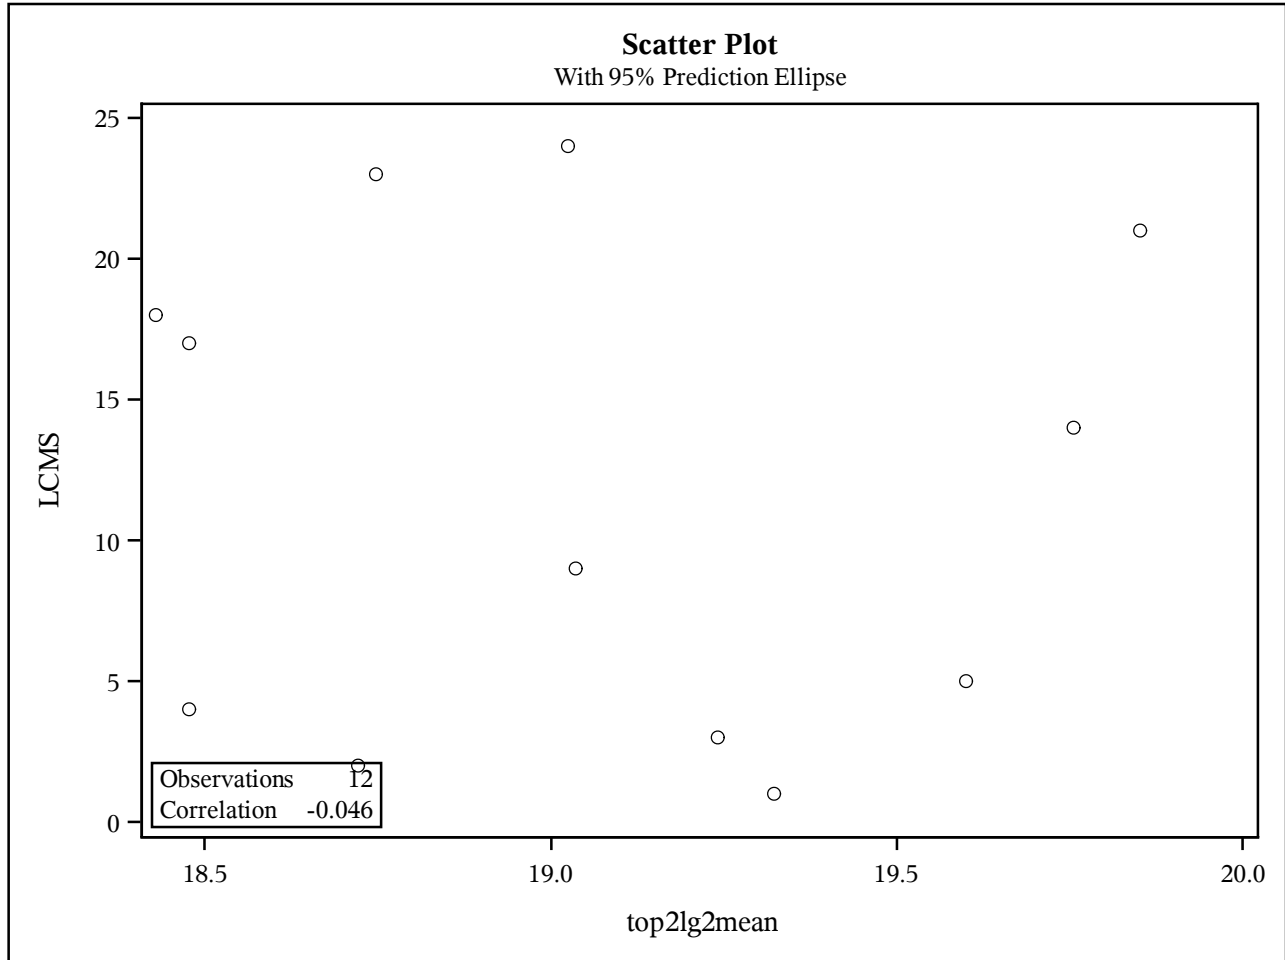



**Correlation C\_pooltop2lg2mean\_tp2 symbol LCMS****The CORR Procedure**

Gene\_Symbol=LRG1

2 Variables: top2lg2mean LCMS

| Simple Statistics |    |          |         |           |          |          |
|-------------------|----|----------|---------|-----------|----------|----------|
| Variable          | N  | Mean     | Std Dev | Sum       | Minimum  | Maximum  |
| top2lg2mean       | 12 | 21.04480 | 0.32579 | 252.53765 | 20.54096 | 21.57320 |
| LCMS              | 12 | 11.75000 | 8.70867 | 141.00000 | 1.00000  | 24.00000 |

| Pearson Correlation Coefficients, N = 12<br>Prob >  r  under H0: Rho=0 |                   |                   |
|------------------------------------------------------------------------|-------------------|-------------------|
|                                                                        | top2lg2mean       | LCMS              |
| top2lg2mean                                                            | 1.00000           | 0.20461<br>0.5235 |
| LCMS                                                                   | 0.20461<br>0.5235 | 1.00000           |

**Pearson Correlation Statistics (Fisher's z Transformation)**

| Variable    | With Variable | N  | Sample Correlation | Fisher's z | Bias Adjustment | Correlation Estimate | 95% Confidence Limits |          | p Value for H0:Rho=0 |
|-------------|---------------|----|--------------------|------------|-----------------|----------------------|-----------------------|----------|----------------------|
| top2lg2mean | LCMS          | 12 | 0.20461            | 0.20754    | 0.00930         | 0.19568              | -0.426069             | 0.691883 | 0.5335               |

**Correlation C\_pooltop2lg2mean\_tp2 symbol LCMS**

**The CORR Procedure**

Gene\_Symbol=LRG1

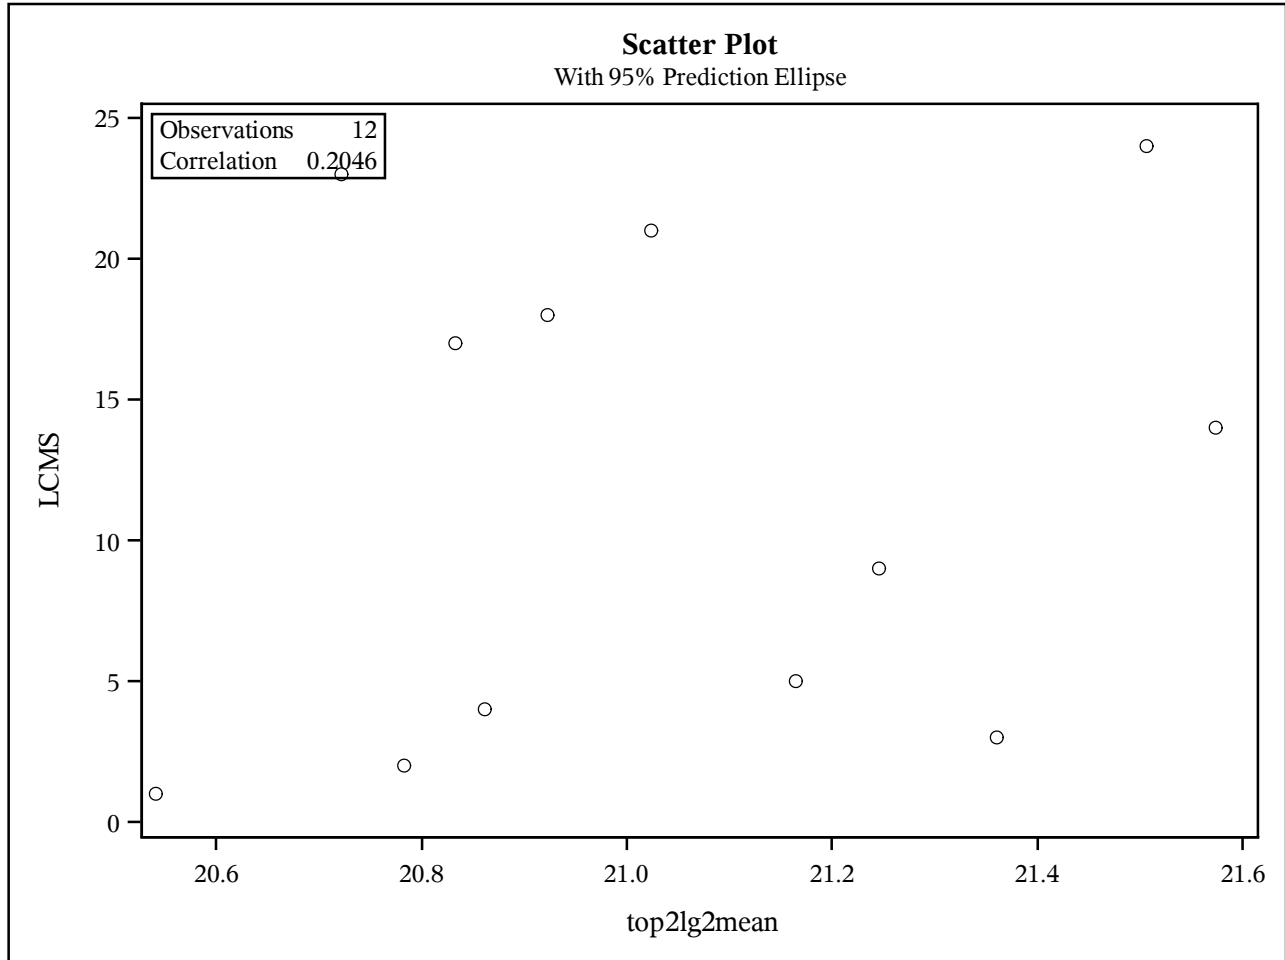

**Correlation C\_pooltop2lg2mean\_tp2 symbol LCMS****The CORR Procedure**

Gene\_Symbol=NCAM1

2 Variables: top2lg2mean LCMS

| Simple Statistics |    |          |         |           |          |          |
|-------------------|----|----------|---------|-----------|----------|----------|
| Variable          | N  | Mean     | Std Dev | Sum       | Minimum  | Maximum  |
| top2lg2mean       | 12 | 20.08905 | 0.30789 | 241.06857 | 19.47076 | 20.43145 |
| LCMS              | 12 | 11.75000 | 8.70867 | 141.00000 | 1.00000  | 24.00000 |

| Pearson Correlation Coefficients, N = 12<br>Prob >  r  under H0: Rho=0 |                   |                   |
|------------------------------------------------------------------------|-------------------|-------------------|
|                                                                        | top2lg2mean       | LCMS              |
| top2lg2mean                                                            | 1.00000           | 0.01436<br>0.9647 |
| LCMS                                                                   | 0.01436<br>0.9647 | 1.00000           |

**Pearson Correlation Statistics (Fisher's z Transformation)**

| Variable    | With Variable | N  | Sample Correlation | Fisher's z | Bias Adjustment | Correlation Estimate | 95% Confidence Limits |          | p Value for H0:Rho=0 |
|-------------|---------------|----|--------------------|------------|-----------------|----------------------|-----------------------|----------|----------------------|
| top2lg2mean | LCMS          | 12 | 0.01436            | 0.01436    | 0.0006527       | 0.01371              | -0.564637             | 0.583022 | 0.9656               |

**Correlation C\_pooltop2lg2mean\_tp2 symbol LCMS****The CORR Procedure**

Gene\_Symbol=NCAM1

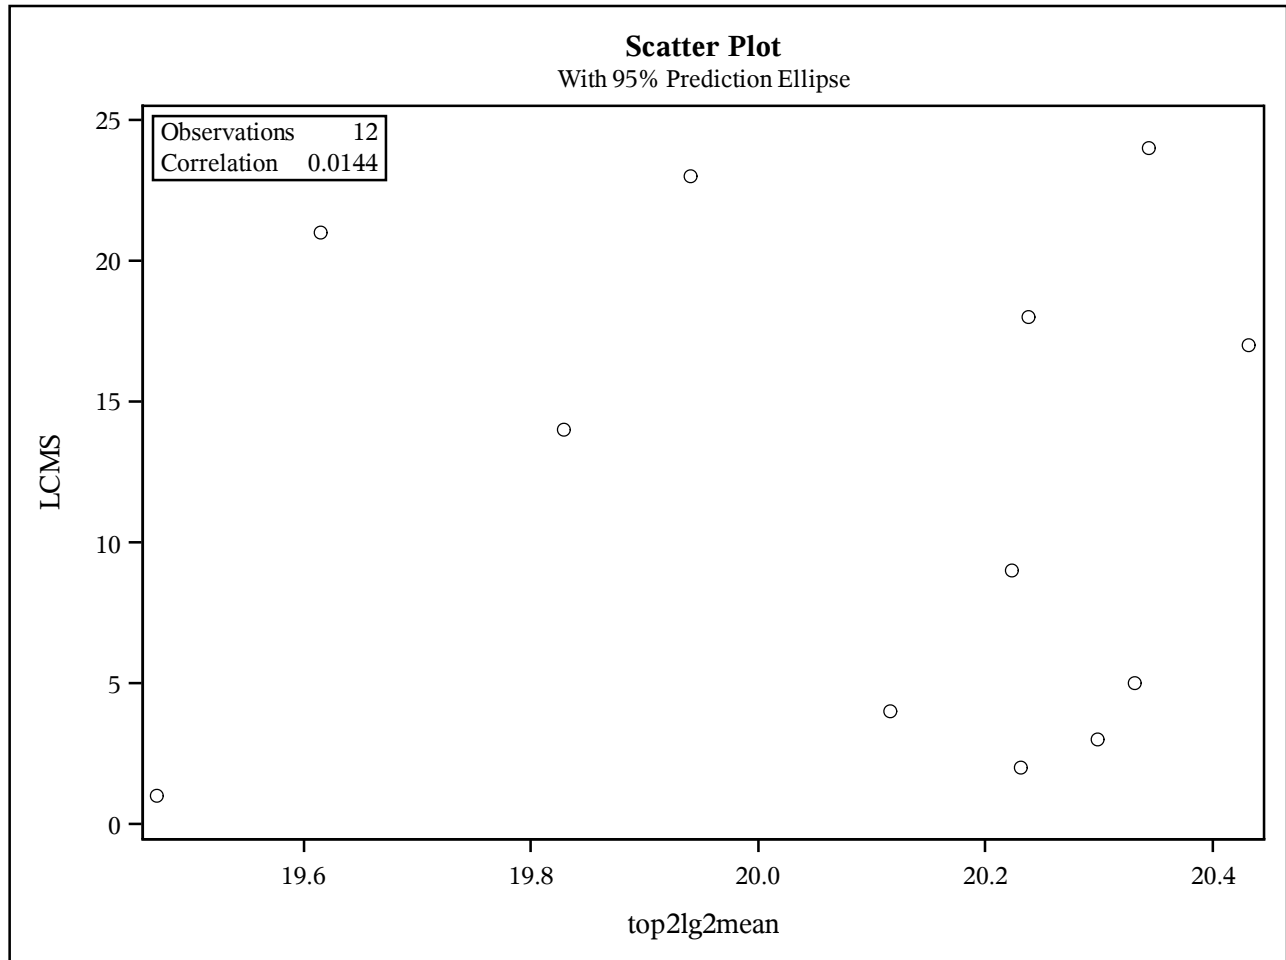

**Correlation C\_pooltop2lg2mean\_tp2 symbol LCMS****The CORR Procedure**

Gene\_Symbol=NCAN

2 Variables: top2lg2mean LCMS

| Simple Statistics |    |          |         |           |          |          |
|-------------------|----|----------|---------|-----------|----------|----------|
| Variable          | N  | Mean     | Std Dev | Sum       | Minimum  | Maximum  |
| top2lg2mean       | 12 | 17.41564 | 0.26096 | 208.98771 | 16.95932 | 17.82961 |
| LCMS              | 12 | 11.75000 | 8.70867 | 141.00000 | 1.00000  | 24.00000 |

| Pearson Correlation Coefficients, N = 12<br>Prob >  r  under H0: Rho=0 |                    |                    |
|------------------------------------------------------------------------|--------------------|--------------------|
|                                                                        | top2lg2mean        | LCMS               |
| top2lg2mean                                                            | 1.00000            | -0.78699<br>0.0024 |
| LCMS                                                                   | -0.78699<br>0.0024 | 1.00000            |

| Pearson Correlation Statistics (Fisher's z Transformation) |               |    |                    |            |                 |                      |                       |           |                      |
|------------------------------------------------------------|---------------|----|--------------------|------------|-----------------|----------------------|-----------------------|-----------|----------------------|
| Variable                                                   | With Variable | N  | Sample Correlation | Fisher's z | Bias Adjustment | Correlation Estimate | 95% Confidence Limits |           | p Value for H0:Rho=0 |
| top2lg2mean                                                | LCMS          | 12 | -0.78699           | -1.06347   | -0.03577        | -0.77298             | -0.932994             | -0.357816 | 0.0014               |

**Correlation C\_pooltop2lg2mean\_tp2 symbol LCMS**

**The CORR Procedure**

Gene\_Symbol=NCAN

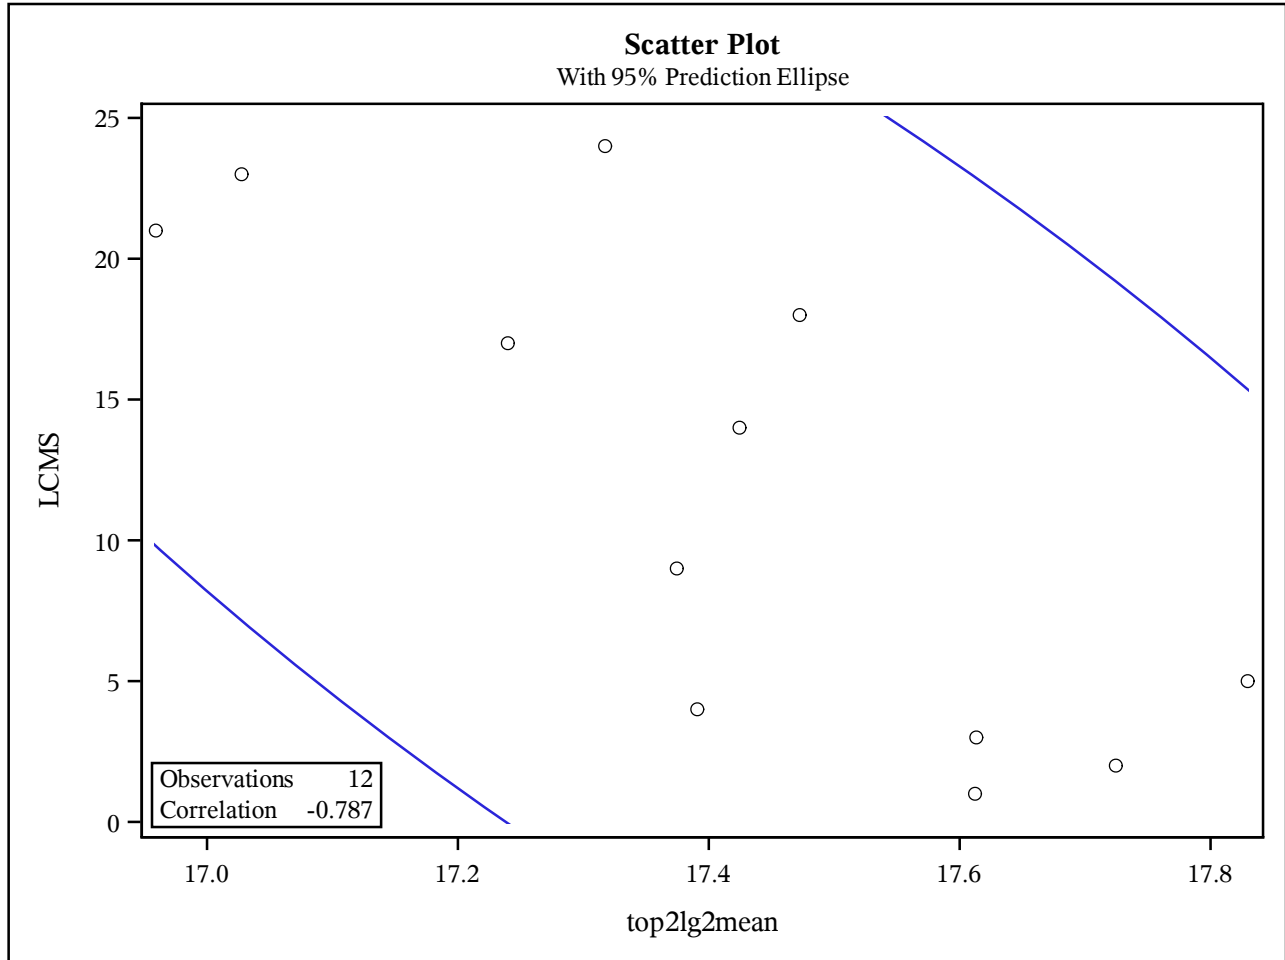

**Correlation C\_pooltop2lg2mean\_tp2 symbol LCMS****The CORR Procedure**

Gene\_Symbol=NELL2

2 Variables: top2lg2mean LCMS

| Simple Statistics |    |          |         |           |          |          |
|-------------------|----|----------|---------|-----------|----------|----------|
| Variable          | N  | Mean     | Std Dev | Sum       | Minimum  | Maximum  |
| top2lg2mean       | 12 | 19.96714 | 0.43713 | 239.60562 | 19.30654 | 20.90915 |
| LCMS              | 12 | 11.75000 | 8.70867 | 141.00000 | 1.00000  | 24.00000 |

| Pearson Correlation Coefficients, N = 12<br>Prob >  r  under H0: Rho=0 |                    |                    |
|------------------------------------------------------------------------|--------------------|--------------------|
|                                                                        | top2lg2mean        | LCMS               |
| top2lg2mean                                                            | 1.00000            | -0.21615<br>0.4998 |
| LCMS                                                                   | -0.21615<br>0.4998 | 1.00000            |

| Pearson Correlation Statistics (Fisher's z Transformation) |               |    |                    |            |                 |                      |                       |          |                      |
|------------------------------------------------------------|---------------|----|--------------------|------------|-----------------|----------------------|-----------------------|----------|----------------------|
| Variable                                                   | With Variable | N  | Sample Correlation | Fisher's z | Bias Adjustment | Correlation Estimate | 95% Confidence Limits |          | p Value for H0:Rho=0 |
| top2lg2mean                                                | LCMS          | 12 | -0.21615           | -0.21962   | -0.00983        | -0.20677             | -0.697858             | 0.416566 | 0.5100               |

**Correlation C\_pooltop2lg2mean\_tp2 symbol LCMS**

**The CORR Procedure**

Gene\_Symbol=NELL2

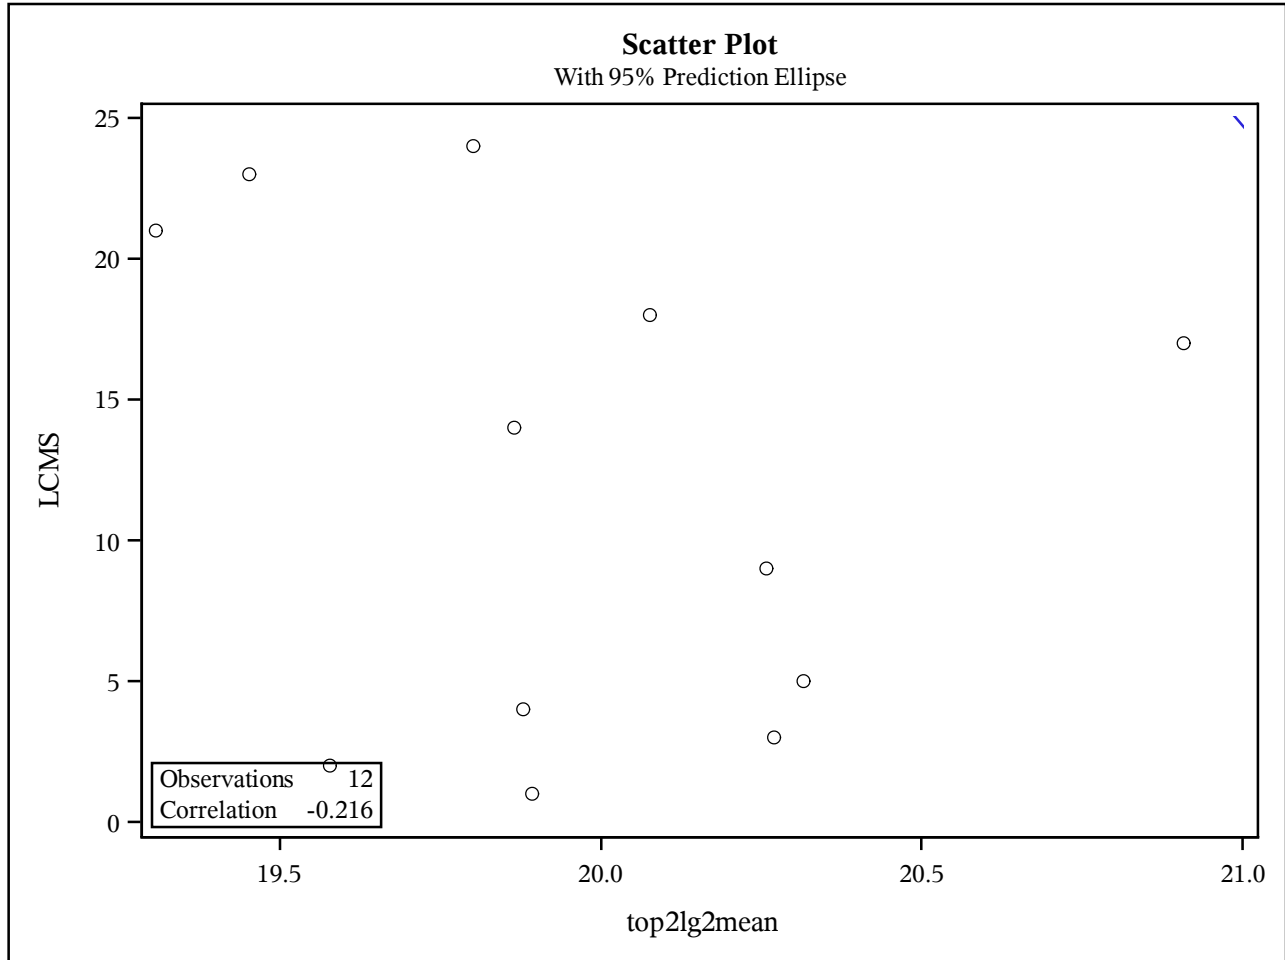



**Correlation C\_pooltop2lg2mean\_tp2 symbol LCMS****The CORR Procedure**

Gene\_Symbol=NEO1

2 Variables: top2lg2mean LCMS

| Simple Statistics |    |          |         |           |          |          |
|-------------------|----|----------|---------|-----------|----------|----------|
| Variable          | N  | Mean     | Std Dev | Sum       | Minimum  | Maximum  |
| top2lg2mean       | 12 | 18.63564 | 0.41217 | 223.62765 | 17.85830 | 19.26165 |
| LCMS              | 12 | 11.75000 | 8.70867 | 141.00000 | 1.00000  | 24.00000 |

| Pearson Correlation Coefficients, N = 12<br>Prob >  r  under H0: Rho=0 |                   |                   |
|------------------------------------------------------------------------|-------------------|-------------------|
|                                                                        | top2lg2mean       | LCMS              |
| top2lg2mean                                                            | 1.00000           | 0.69720<br>0.0117 |
| LCMS                                                                   | 0.69720<br>0.0117 | 1.00000           |

**Pearson Correlation Statistics (Fisher's z Transformation)**

| Variable    | With Variable | N  | Sample Correlation | Fisher's z | Bias Adjustment | Correlation Estimate | 95% Confidence Limits |          | p Value for H0:Rho=0 |
|-------------|---------------|----|--------------------|------------|-----------------|----------------------|-----------------------|----------|----------------------|
| top2lg2mean | LCMS          | 12 | 0.69720            | 0.86184    | 0.03169         | 0.68056              | 0.175007              | 0.902116 | 0.0097               |

**Correlation C\_pooltop2lg2mean\_tp2 symbol LCMS**

**The CORR Procedure**

Gene\_Symbol=NEO1

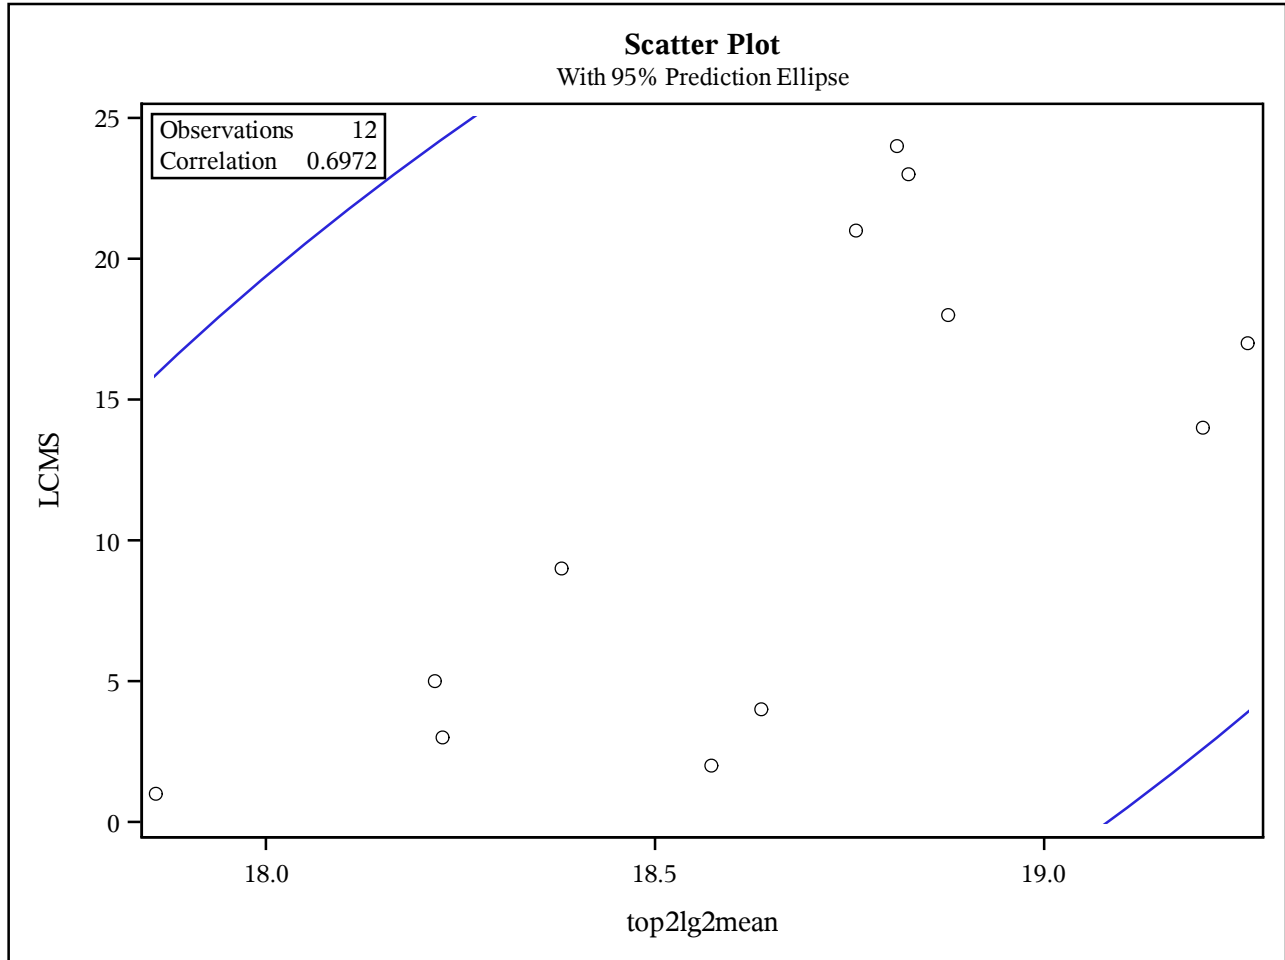

**Correlation C\_pooltop2lg2mean\_tp2 symbol LCMS****The CORR Procedure**

Gene\_Symbol=NPC2

2 Variables: top2lg2mean LCMS

| Simple Statistics |    |          |         |           |          |          |
|-------------------|----|----------|---------|-----------|----------|----------|
| Variable          | N  | Mean     | Std Dev | Sum       | Minimum  | Maximum  |
| top2lg2mean       | 12 | 19.67006 | 0.50896 | 236.04070 | 18.82205 | 20.78194 |
| LCMS              | 12 | 11.75000 | 8.70867 | 141.00000 | 1.00000  | 24.00000 |

| Pearson Correlation Coefficients, N = 12<br>Prob >  r  under H0: Rho=0 |                    |                    |
|------------------------------------------------------------------------|--------------------|--------------------|
|                                                                        | top2lg2mean        | LCMS               |
| top2lg2mean                                                            | 1.00000            | -0.45667<br>0.1356 |
| LCMS                                                                   | -0.45667<br>0.1356 | 1.00000            |

| Pearson Correlation Statistics (Fisher's z Transformation) |               |    |                    |            |                 |                      |                       |          |                      |
|------------------------------------------------------------|---------------|----|--------------------|------------|-----------------|----------------------|-----------------------|----------|----------------------|
| Variable                                                   | With Variable | N  | Sample Correlation | Fisher's z | Bias Adjustment | Correlation Estimate | 95% Confidence Limits |          | p Value for H0:Rho=0 |
| top2lg2mean                                                | LCMS          | 12 | -0.45667           | -0.49309   | -0.02076        | -0.44008             | -0.809527             | 0.179036 | 0.1391               |

**Correlation C\_pooltop2lg2mean\_tp2 symbol LCMS**

**The CORR Procedure**

**Gene\_Symbol=NPC2**

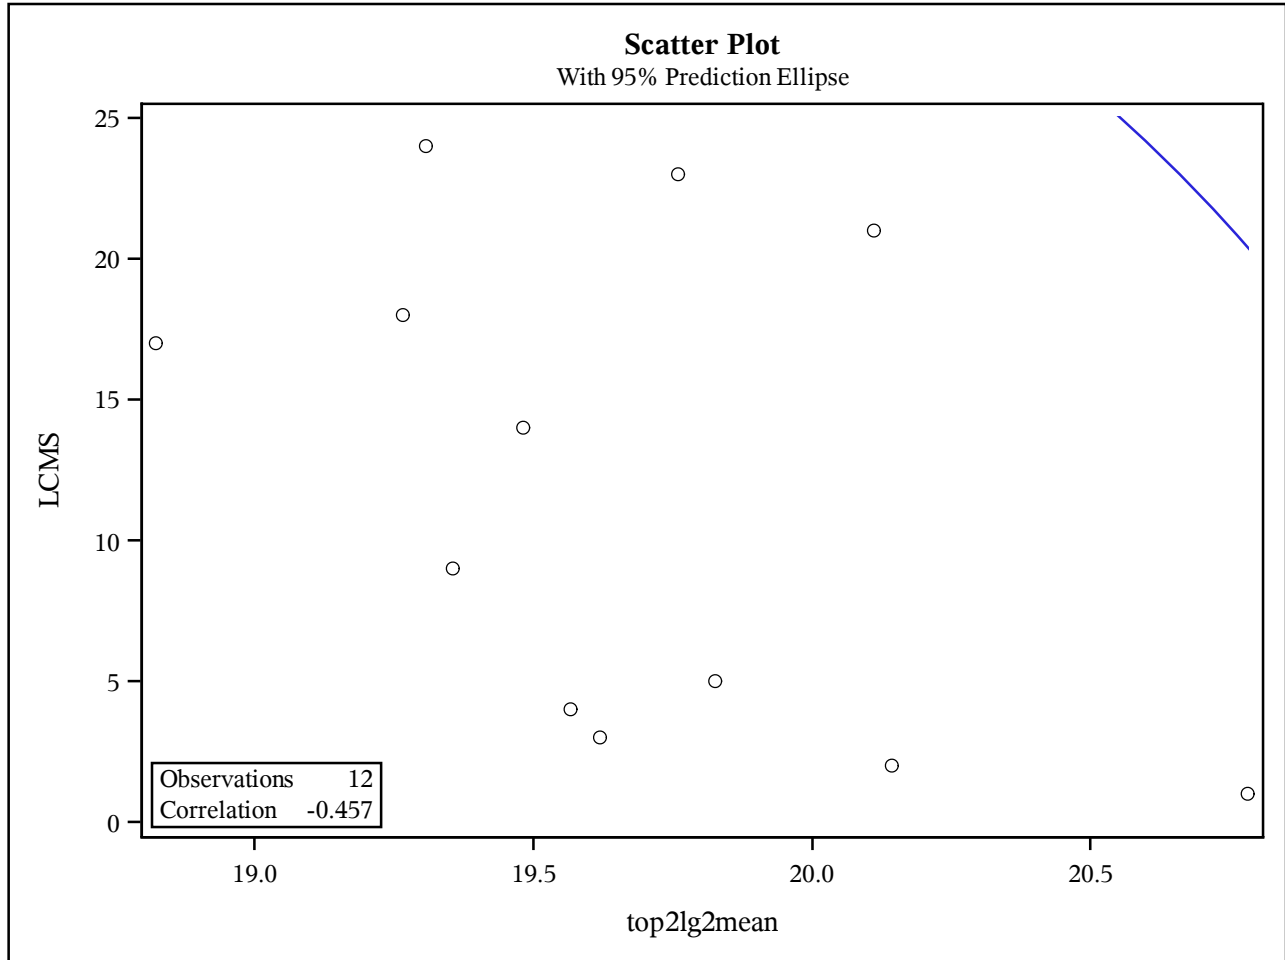

**Correlation C\_pooltop2lg2mean\_tp2 symbol LCMS****The CORR Procedure**

Gene\_Symbol=NRCAM

2 Variables: top2lg2mean LCMS

| Simple Statistics |    |          |         |           |          |          |
|-------------------|----|----------|---------|-----------|----------|----------|
| Variable          | N  | Mean     | Std Dev | Sum       | Minimum  | Maximum  |
| top2lg2mean       | 12 | 20.82374 | 0.27138 | 249.88485 | 20.37181 | 21.20853 |
| LCMS              | 12 | 11.75000 | 8.70867 | 141.00000 | 1.00000  | 24.00000 |

| Pearson Correlation Coefficients, N = 12<br>Prob >  r  under H0: Rho=0 |                    |                    |
|------------------------------------------------------------------------|--------------------|--------------------|
|                                                                        | top2lg2mean        | LCMS               |
| top2lg2mean                                                            | 1.00000            | -0.07480<br>0.8173 |
| LCMS                                                                   | -0.07480<br>0.8173 | 1.00000            |

| Pearson Correlation Statistics (Fisher's z Transformation) |               |    |                    |            |                 |                      |                       |          |                      |
|------------------------------------------------------------|---------------|----|--------------------|------------|-----------------|----------------------|-----------------------|----------|----------------------|
| Variable                                                   | With Variable | N  | Sample Correlation | Fisher's z | Bias Adjustment | Correlation Estimate | 95% Confidence Limits |          | p Value for H0:Rho=0 |
| top2lg2mean                                                | LCMS          | 12 | -0.07480           | -0.07494   | -0.00340        | -0.07142             | -0.619913             | 0.523957 | 0.8221               |

**Correlation C\_pooltop2lg2mean\_tp2 symbol LCMS****The CORR Procedure**

Gene\_Symbol=NRCAM

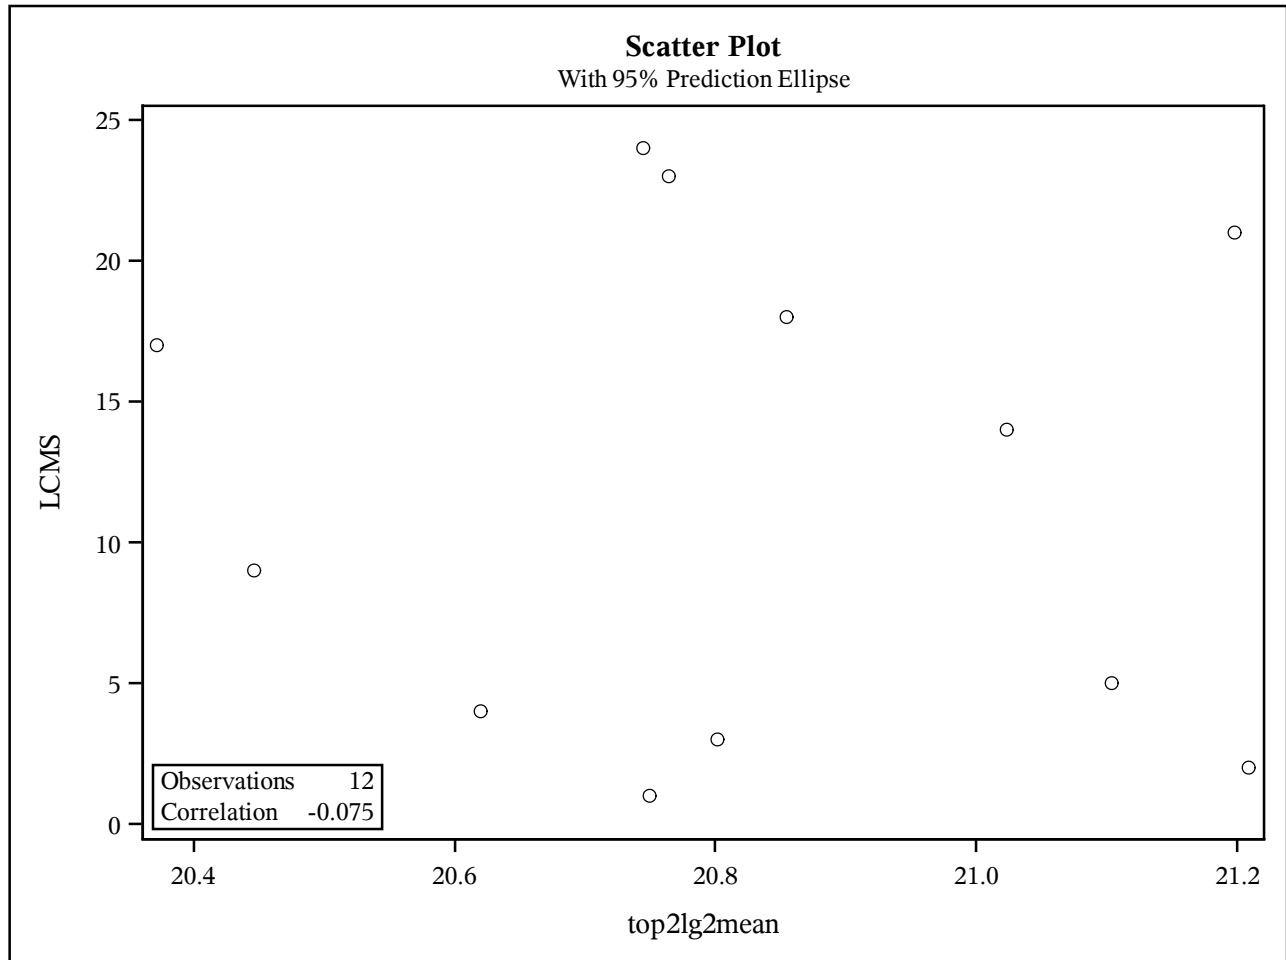

**Correlation C\_pooltop2lg2mean\_tp2 symbol LCMS****The CORR Procedure**

Gene\_Symbol=NTM

2 Variables: top2lg2mean LCMS

| Simple Statistics |    |          |         |           |          |          |
|-------------------|----|----------|---------|-----------|----------|----------|
| Variable          | N  | Mean     | Std Dev | Sum       | Minimum  | Maximum  |
| top2lg2mean       | 12 | 19.04428 | 0.32215 | 228.53139 | 18.56987 | 19.55018 |
| LCMS              | 12 | 11.75000 | 8.70867 | 141.00000 | 1.00000  | 24.00000 |

| Pearson Correlation Coefficients, N = 12<br>Prob >  r  under H0: Rho=0 |                    |                    |
|------------------------------------------------------------------------|--------------------|--------------------|
|                                                                        | top2lg2mean        | LCMS               |
| top2lg2mean                                                            | 1.00000            | -0.36423<br>0.2444 |
| LCMS                                                                   | -0.36423<br>0.2444 | 1.00000            |

**Pearson Correlation Statistics (Fisher's z Transformation)**

| Variable    | With Variable | N  | Sample Correlation | Fisher's z | Bias Adjustment | Correlation Estimate | 95% Confidence Limits |          | p Value for H0:Rho=0 |
|-------------|---------------|----|--------------------|------------|-----------------|----------------------|-----------------------|----------|----------------------|
| top2lg2mean | LCMS          | 12 | -0.36423           | -0.38176   | -0.01656        | -0.34979             | -0.769264             | 0.280404 | 0.2521               |

**Correlation C\_pooltop2lg2mean\_tp2 symbol LCMS**

**The CORR Procedure**

Gene\_Symbol=NTM

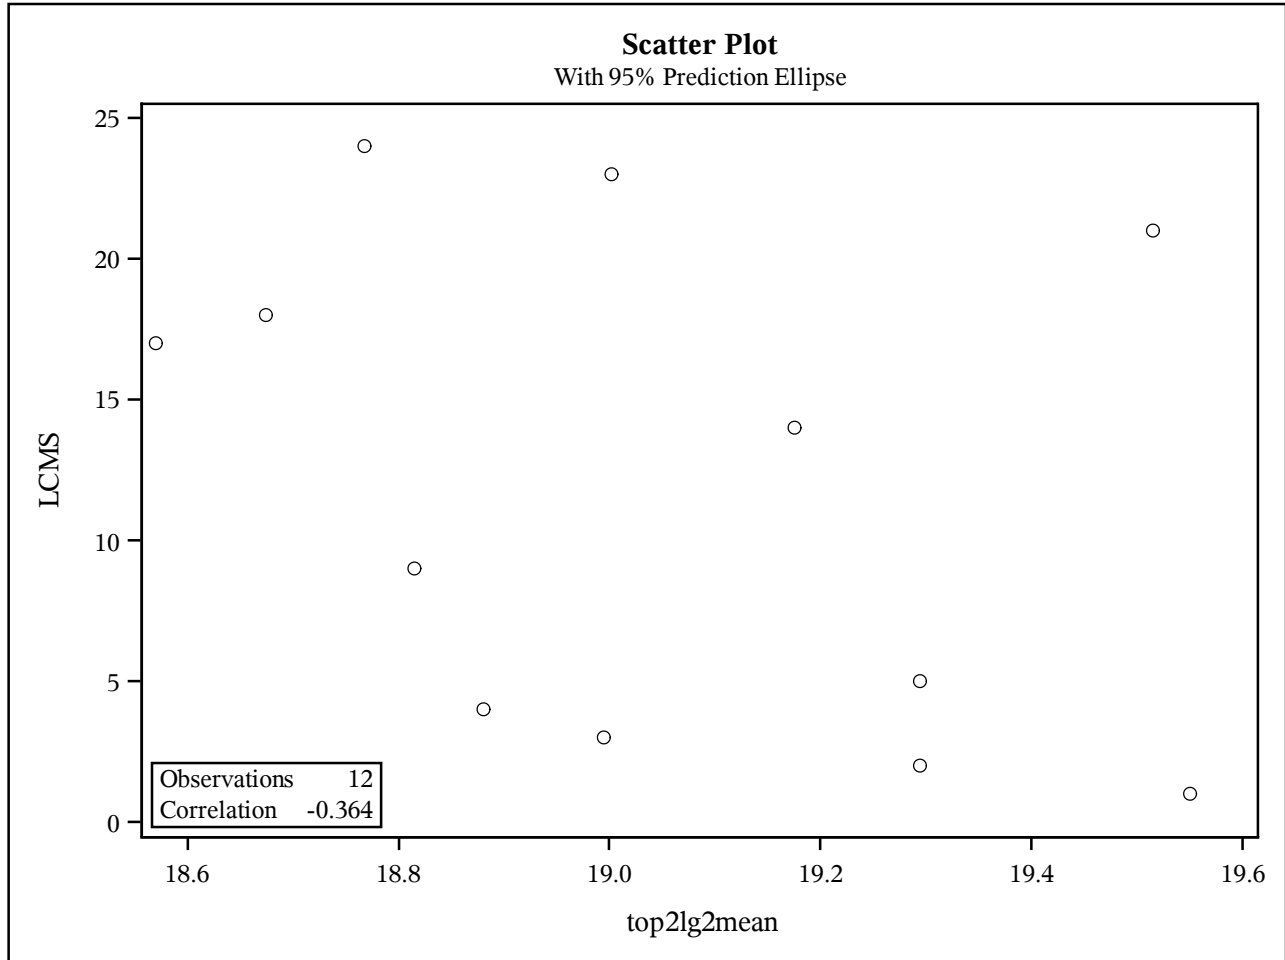



**Correlation C\_pooltop2lg2mean\_tp2 symbol LCMS****The CORR Procedure**

Gene\_Symbol=OGN

2 Variables: top2lg2mean LCMS

| Simple Statistics |    |          |         |           |          |          |
|-------------------|----|----------|---------|-----------|----------|----------|
| Variable          | N  | Mean     | Std Dev | Sum       | Minimum  | Maximum  |
| top2lg2mean       | 12 | 20.80877 | 0.64074 | 249.70526 | 19.75513 | 22.16848 |
| LCMS              | 12 | 11.75000 | 8.70867 | 141.00000 | 1.00000  | 24.00000 |

| Pearson Correlation Coefficients, N = 12<br>Prob >  r  under H0: Rho=0 |                    |                    |
|------------------------------------------------------------------------|--------------------|--------------------|
|                                                                        | top2lg2mean        | LCMS               |
| top2lg2mean                                                            | 1.00000            | -0.04068<br>0.9001 |
| LCMS                                                                   | -0.04068<br>0.9001 | 1.00000            |

| Pearson Correlation Statistics (Fisher's z Transformation) |               |    |                    |            |                 |                      |                       |          |                      |
|------------------------------------------------------------|---------------|----|--------------------|------------|-----------------|----------------------|-----------------------|----------|----------------------|
| Variable                                                   | With Variable | N  | Sample Correlation | Fisher's z | Bias Adjustment | Correlation Estimate | 95% Confidence Limits |          | p Value for H0:Rho=0 |
| top2lg2mean                                                | LCMS          | 12 | -0.04068           | -0.04070   | -0.00185        | -0.03883             | -0.599378             | 0.547264 | 0.9028               |

### Correlation C\_pooltop2lg2mean\_tp2 symbol LCMS

#### The CORR Procedure

Gene\_Symbol=OGN

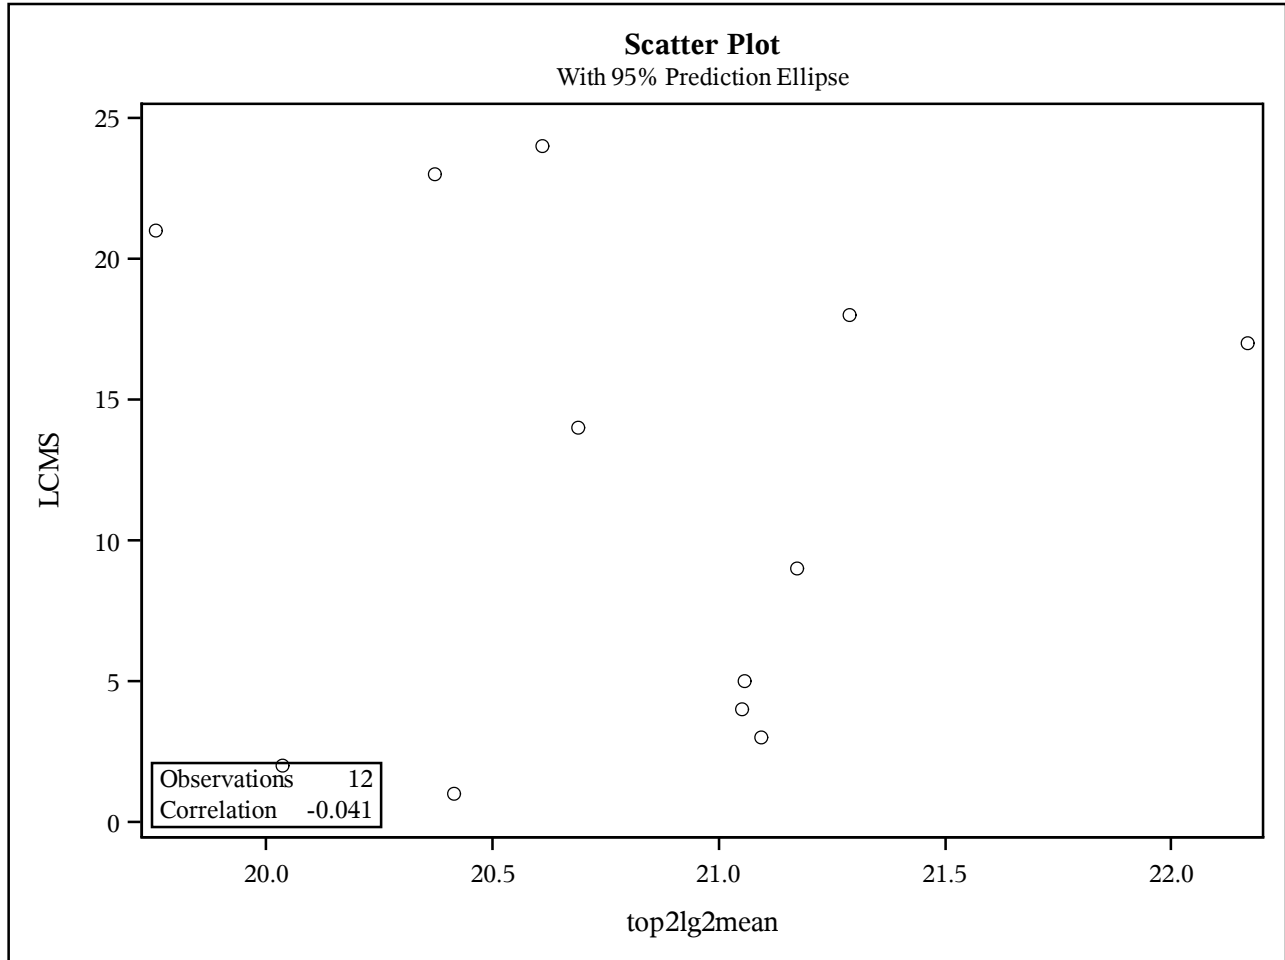

**Correlation C\_pooltop2lg2mean\_tp2 symbol LCMS****The CORR Procedure**

Gene\_Symbol=ORM1

2 Variables: top2lg2mean LCMS

| Simple Statistics |    |          |         |           |          |          |
|-------------------|----|----------|---------|-----------|----------|----------|
| Variable          | N  | Mean     | Std Dev | Sum       | Minimum  | Maximum  |
| top2lg2mean       | 12 | 25.27837 | 0.18764 | 303.34041 | 24.93241 | 25.59154 |
| LCMS              | 12 | 11.75000 | 8.70867 | 141.00000 | 1.00000  | 24.00000 |

| Pearson Correlation Coefficients, N = 12<br>Prob >  r  under H0: Rho=0 |                   |                   |
|------------------------------------------------------------------------|-------------------|-------------------|
|                                                                        | top2lg2mean       | LCMS              |
| top2lg2mean                                                            | 1.00000           | 0.48114<br>0.1133 |
| LCMS                                                                   | 0.48114<br>0.1133 | 1.00000           |

| Pearson Correlation Statistics (Fisher's z Transformation) |               |    |                    |            |                 |                      |                       |          |                      |
|------------------------------------------------------------|---------------|----|--------------------|------------|-----------------|----------------------|-----------------------|----------|----------------------|
| Variable                                                   | With Variable | N  | Sample Correlation | Fisher's z | Bias Adjustment | Correlation Estimate | 95% Confidence Limits |          | p Value for H0:Rho=0 |
| top2lg2mean                                                | LCMS          | 12 | 0.48114            | 0.52446    | 0.02187         | 0.46415              | -0.149597             | 0.819704 | 0.1156               |

**Correlation C\_pooltop2lg2mean\_tp2 symbol LCMS**

**The CORR Procedure**

Gene\_Symbol=ORM1

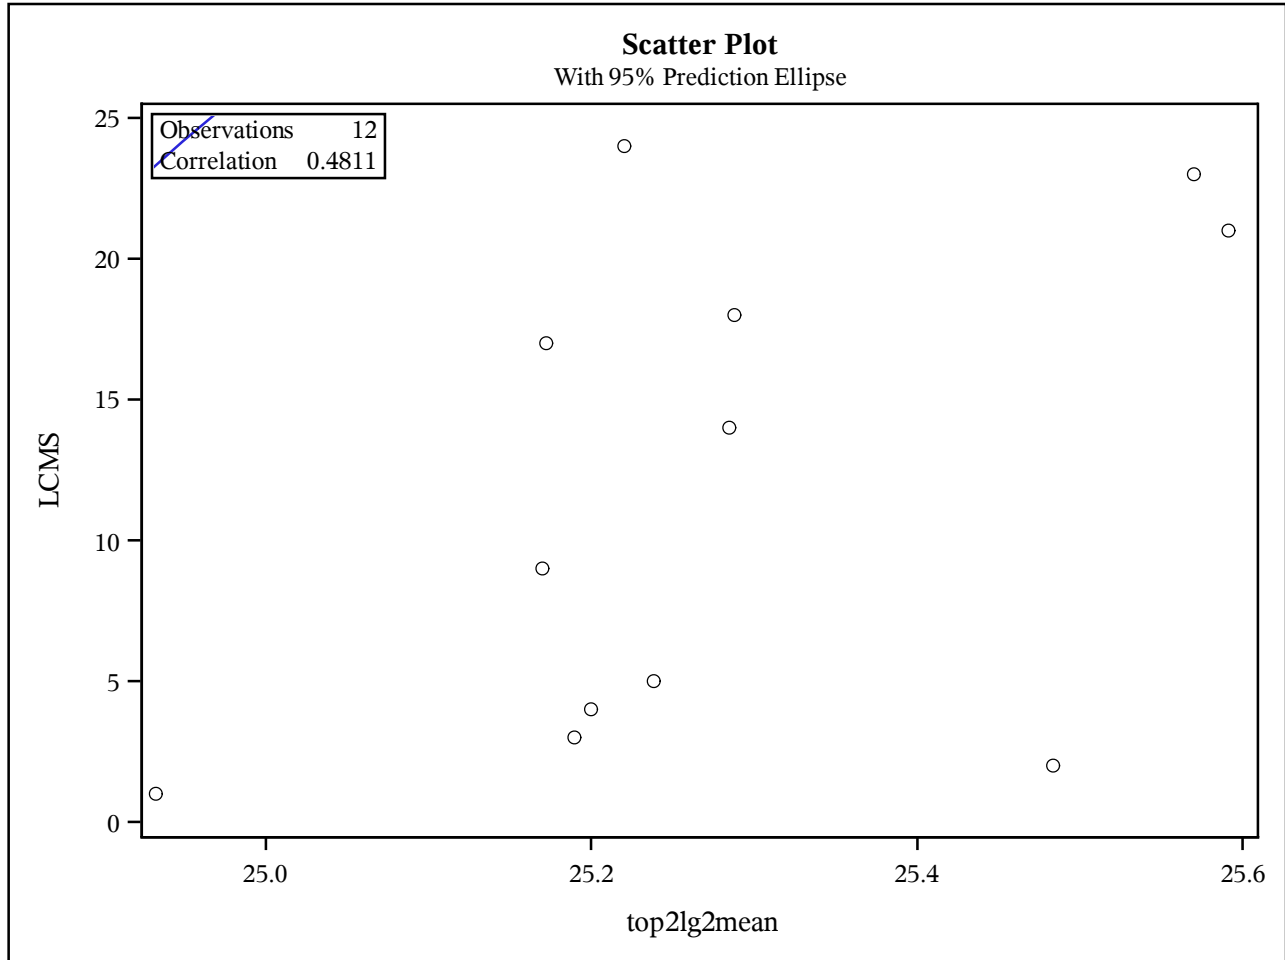

**Correlation C\_pooltop2lg2mean\_tp2 symbol LCMS****The CORR Procedure**

Gene\_Symbol=PKM2

2 Variables: top2lg2mean LCMS

| Simple Statistics |    |          |         |           |          |          |
|-------------------|----|----------|---------|-----------|----------|----------|
| Variable          | N  | Mean     | Std Dev | Sum       | Minimum  | Maximum  |
| top2lg2mean       | 12 | 16.02777 | 0.55684 | 192.33324 | 15.22430 | 17.32496 |
| LCMS              | 12 | 11.75000 | 8.70867 | 141.00000 | 1.00000  | 24.00000 |

| Pearson Correlation Coefficients, N = 12<br>Prob >  r  under H0: Rho=0 |                   |                   |
|------------------------------------------------------------------------|-------------------|-------------------|
|                                                                        | top2lg2mean       | LCMS              |
| top2lg2mean                                                            | 1.00000           | 0.35515<br>0.2573 |
| LCMS                                                                   | 0.35515<br>0.2573 | 1.00000           |

**Pearson Correlation Statistics (Fisher's z Transformation)**

| Variable    | With Variable | N  | Sample Correlation | Fisher's z | Bias Adjustment | Correlation Estimate | 95% Confidence Limits |          | p Value for H0:Rho=0 |
|-------------|---------------|----|--------------------|------------|-----------------|----------------------|-----------------------|----------|----------------------|
| top2lg2mean | LCMS          | 12 | 0.35515            | 0.37133    | 0.01614         | 0.34096              | -0.289608             | 0.765142 | 0.2653               |

**Correlation C\_pooltop2lg2mean\_tp2 symbol LCMS**

**The CORR Procedure**

Gene\_Symbol=PKM2

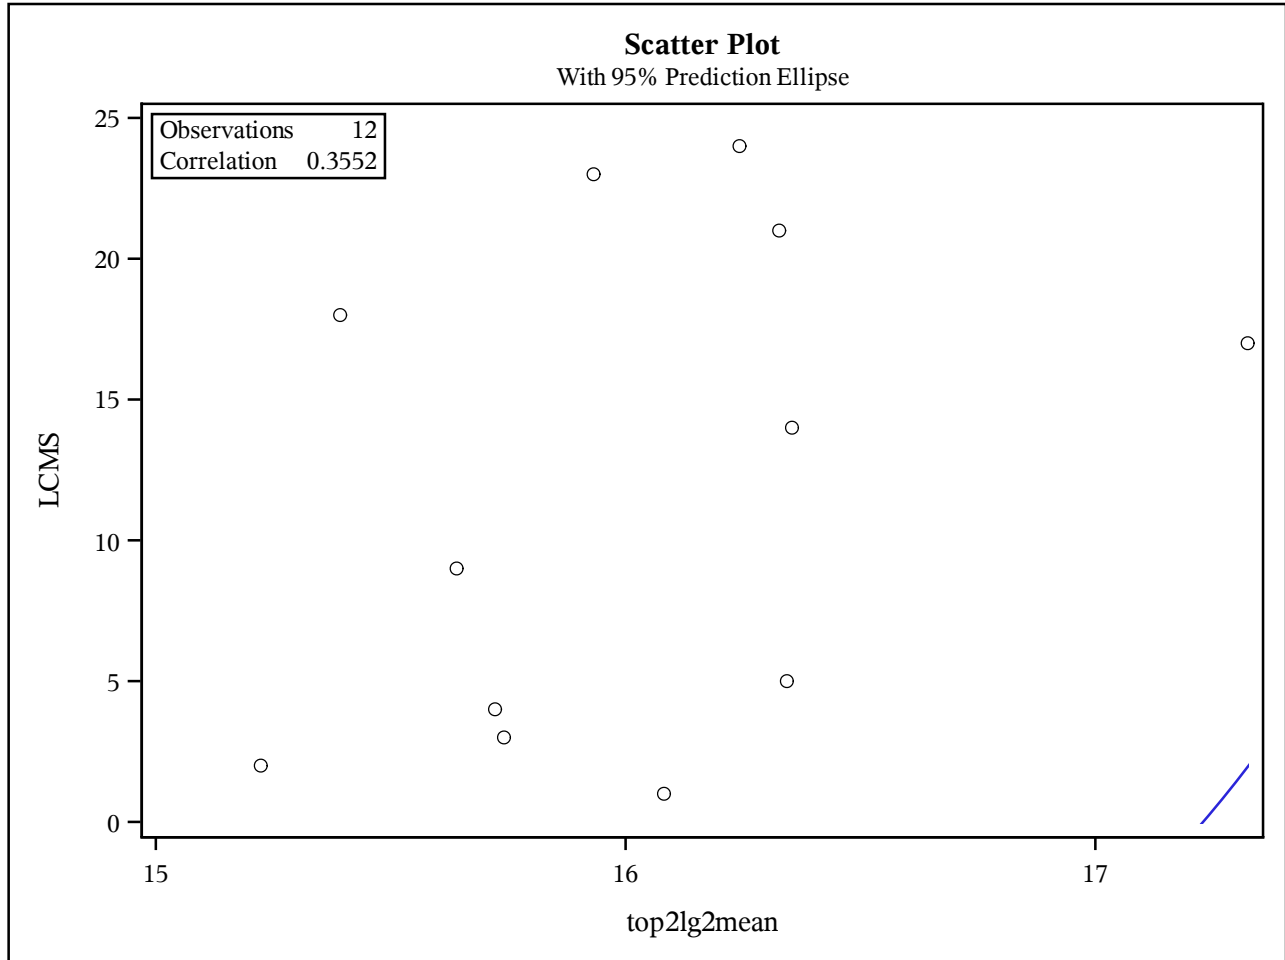

**Correlation C\_pooltop2lg2mean\_tp2 symbol LCMS****The CORR Procedure**

Gene\_Symbol=PLG

2 Variables: top2lg2mean LCMS

| Simple Statistics |    |          |         |           |          |          |
|-------------------|----|----------|---------|-----------|----------|----------|
| Variable          | N  | Mean     | Std Dev | Sum       | Minimum  | Maximum  |
| top2lg2mean       | 12 | 20.94222 | 0.16342 | 251.30666 | 20.64623 | 21.19274 |
| LCMS              | 12 | 11.75000 | 8.70867 | 141.00000 | 1.00000  | 24.00000 |

| Pearson Correlation Coefficients, N = 12<br>Prob >  r  under H0: Rho=0 |                   |                   |
|------------------------------------------------------------------------|-------------------|-------------------|
|                                                                        | top2lg2mean       | LCMS              |
| top2lg2mean                                                            | 1.00000           | 0.62345<br>0.0303 |
| LCMS                                                                   | 0.62345<br>0.0303 | 1.00000           |

| Pearson Correlation Statistics (Fisher's z Transformation) |               |    |                    |            |                 |                      |                       |          |                      |
|------------------------------------------------------------|---------------|----|--------------------|------------|-----------------|----------------------|-----------------------|----------|----------------------|
| Variable                                                   | With Variable | N  | Sample Correlation | Fisher's z | Bias Adjustment | Correlation Estimate | 95% Confidence Limits |          | p Value for H0:Rho=0 |
| top2lg2mean                                                | LCMS          | 12 | 0.62345            | 0.73062    | 0.02834         | 0.60582              | 0.048924              | 0.875370 | 0.0284               |

**Correlation C\_pooltop2lg2mean\_tp2 symbol LCMS**

**The CORR Procedure**

Gene\_Symbol=PLG

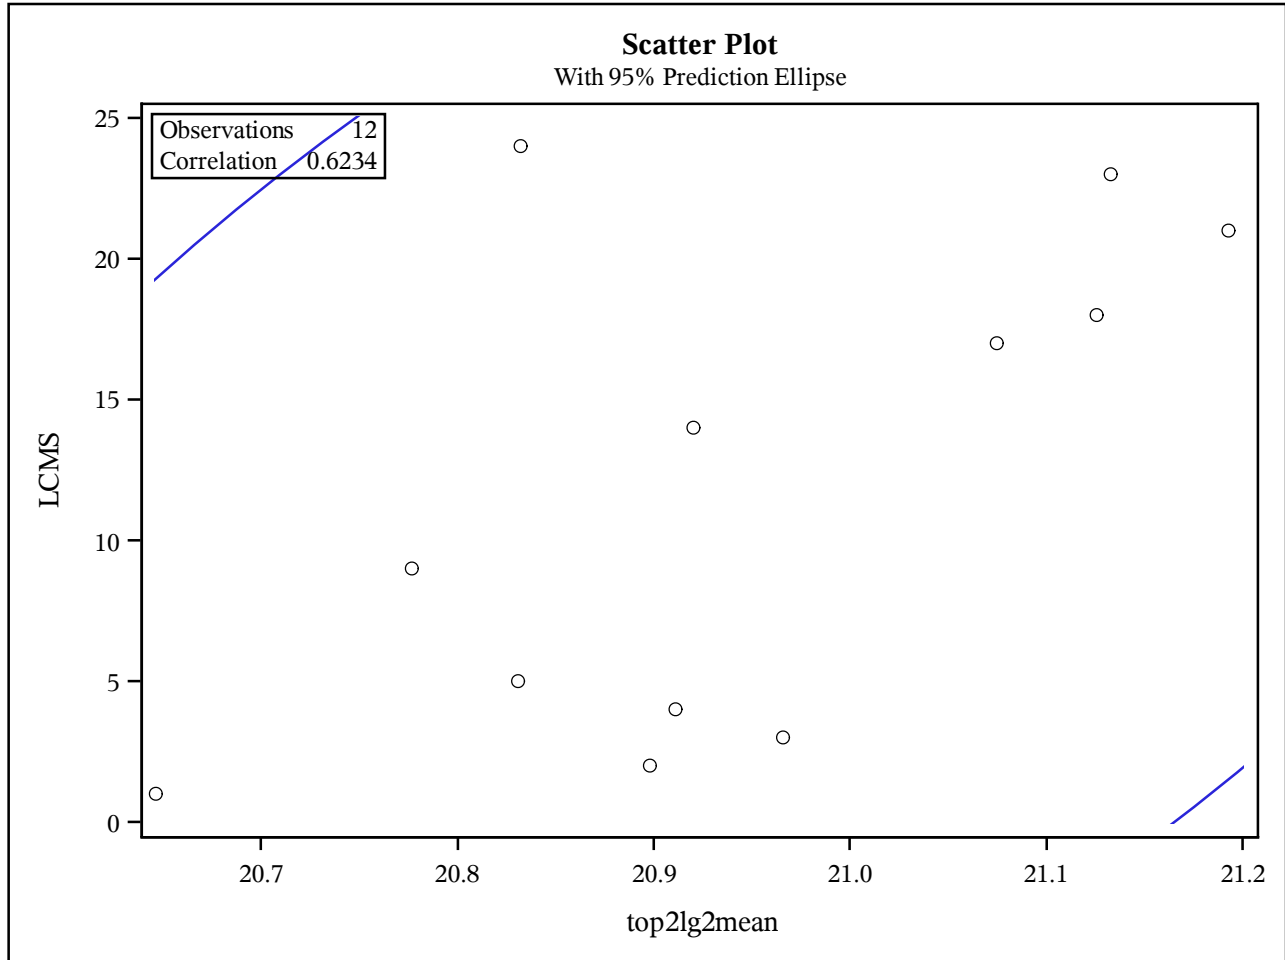



**Correlation C\_pooltop2lg2mean\_tp2 symbol LCMS****The CORR Procedure**

Gene\_Symbol=PSAP

2 Variables: top2lg2mean LCMS

| Simple Statistics |    |          |         |           |          |          |
|-------------------|----|----------|---------|-----------|----------|----------|
| Variable          | N  | Mean     | Std Dev | Sum       | Minimum  | Maximum  |
| top2lg2mean       | 12 | 17.99037 | 0.31361 | 215.88439 | 17.41062 | 18.37198 |
| LCMS              | 12 | 11.75000 | 8.70867 | 141.00000 | 1.00000  | 24.00000 |

| Pearson Correlation Coefficients, N = 12<br>Prob >  r  under H0: Rho=0 |                    |                    |
|------------------------------------------------------------------------|--------------------|--------------------|
|                                                                        | top2lg2mean        | LCMS               |
| top2lg2mean                                                            | 1.00000            | -0.29472<br>0.3524 |
| LCMS                                                                   | -0.29472<br>0.3524 | 1.00000            |

| Pearson Correlation Statistics (Fisher's z Transformation) |               |    |                    |            |                 |                      |                       |          |                      |
|------------------------------------------------------------|---------------|----|--------------------|------------|-----------------|----------------------|-----------------------|----------|----------------------|
| Variable                                                   | With Variable | N  | Sample Correlation | Fisher's z | Bias Adjustment | Correlation Estimate | 95% Confidence Limits |          | p Value for H0:Rho=0 |
| top2lg2mean                                                | LCMS          | 12 | -0.29472           | -0.30372   | -0.01340        | -0.28243             | -0.736893             | 0.347850 | 0.3622               |

**Correlation C\_pooltop2lg2mean\_tp2 symbol LCMS**

**The CORR Procedure**

Gene\_Symbol=PSAP

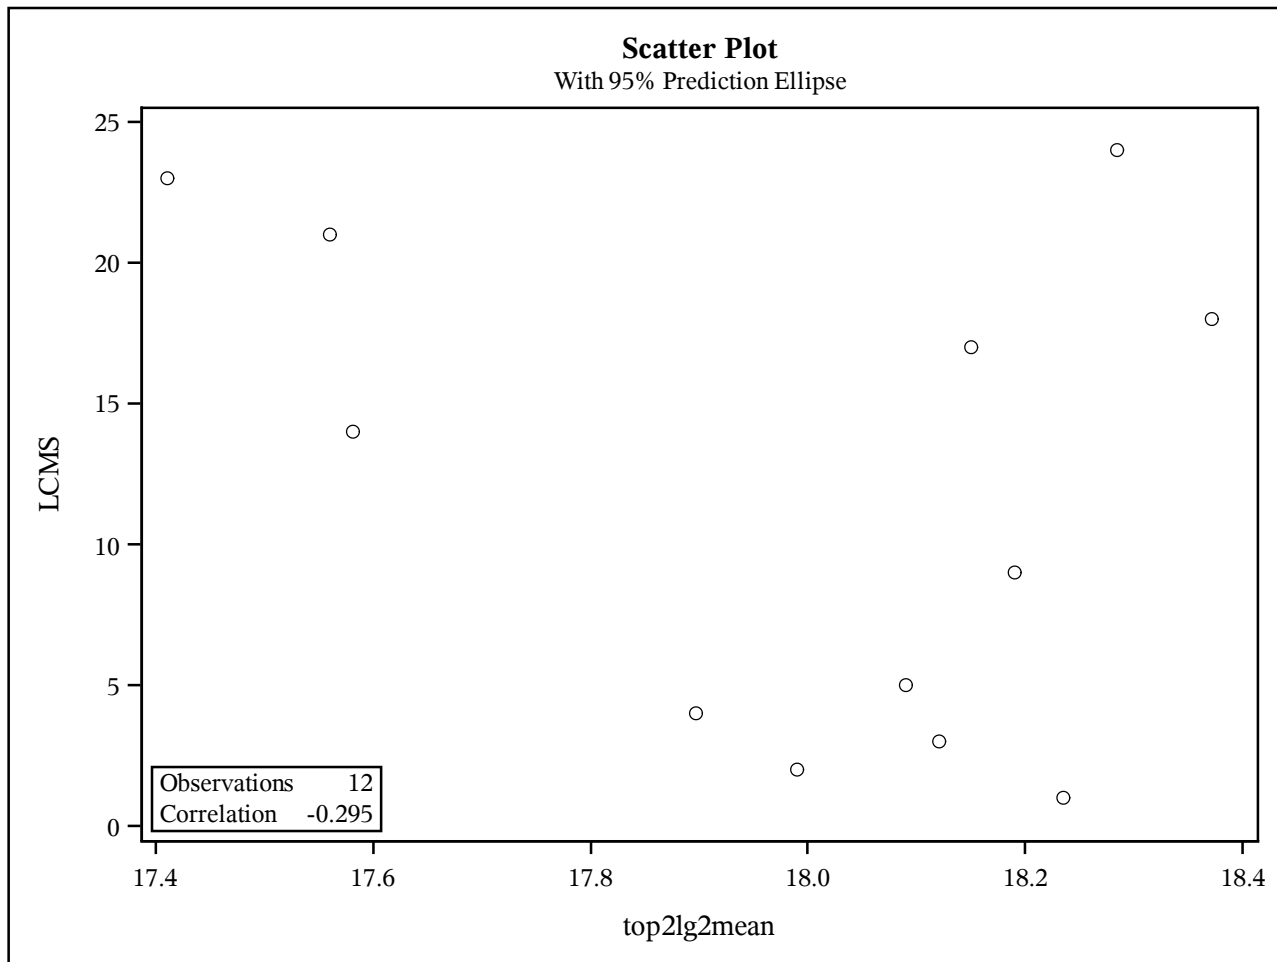

**Correlation C\_pooltop2lg2mean\_tp2 symbol LCMS****The CORR Procedure**

Gene\_Symbol=PTGDS

2 Variables: top2lg2mean LCMS

| Simple Statistics |    |          |         |           |          |          |
|-------------------|----|----------|---------|-----------|----------|----------|
| Variable          | N  | Mean     | Std Dev | Sum       | Minimum  | Maximum  |
| top2lg2mean       | 12 | 23.74446 | 0.21616 | 284.93356 | 23.35282 | 24.11171 |
| LCMS              | 12 | 11.75000 | 8.70867 | 141.00000 | 1.00000  | 24.00000 |

| Pearson Correlation Coefficients, N = 12<br>Prob >  r  under H0: Rho=0 |                   |                   |
|------------------------------------------------------------------------|-------------------|-------------------|
|                                                                        | top2lg2mean       | LCMS              |
| top2lg2mean                                                            | 1.00000           | 0.60027<br>0.0391 |
| LCMS                                                                   | 0.60027<br>0.0391 | 1.00000           |

| Pearson Correlation Statistics (Fisher's z Transformation) |               |    |                    |            |                 |                      |                       |          |                      |
|------------------------------------------------------------|---------------|----|--------------------|------------|-----------------|----------------------|-----------------------|----------|----------------------|
| Variable                                                   | With Variable | N  | Sample Correlation | Fisher's z | Bias Adjustment | Correlation Estimate | 95% Confidence Limits |          | p Value for H0:Rho=0 |
| top2lg2mean                                                | LCMS          | 12 | 0.60027            | 0.69357    | 0.02729         | 0.58253              | 0.012963              | 0.866686 | 0.0375               |

**Correlation C\_pooltop2lg2mean\_tp2 symbol LCMS**

**The CORR Procedure**

Gene\_Symbol=PTGDS

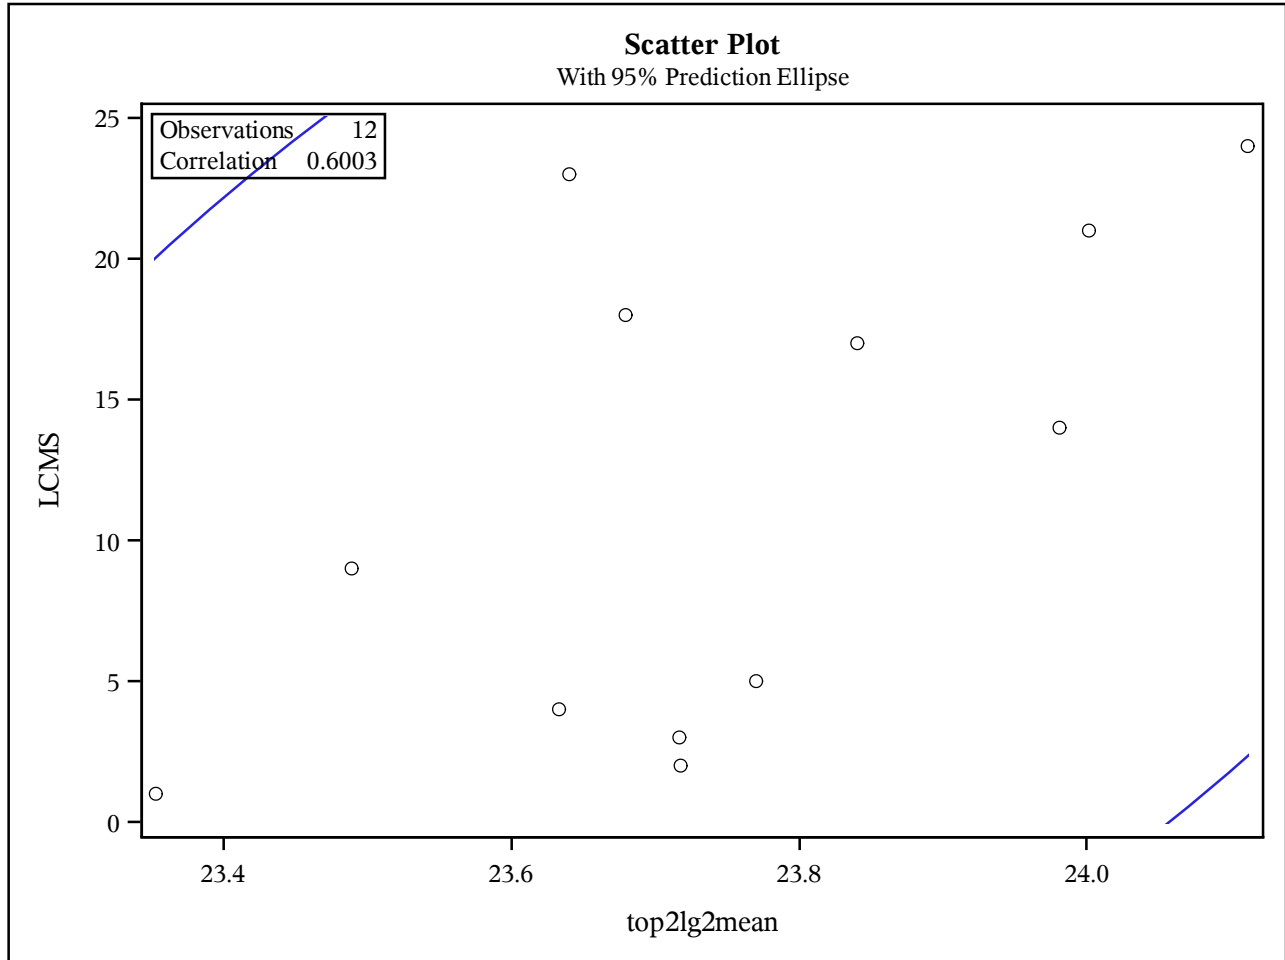

**Correlation C\_pooltop2lg2mean\_tp2 symbol LCMS****The CORR Procedure**

Gene\_Symbol=RBP4

2 Variables: top2lg2mean LCMS

| Simple Statistics |    |          |         |           |          |          |
|-------------------|----|----------|---------|-----------|----------|----------|
| Variable          | N  | Mean     | Std Dev | Sum       | Minimum  | Maximum  |
| top2lg2mean       | 12 | 20.68553 | 0.17505 | 248.22639 | 20.30637 | 20.87414 |
| LCMS              | 12 | 11.75000 | 8.70867 | 141.00000 | 1.00000  | 24.00000 |

| Pearson Correlation Coefficients, N = 12<br>Prob >  r  under H0: Rho=0 |                    |                    |
|------------------------------------------------------------------------|--------------------|--------------------|
|                                                                        | top2lg2mean        | LCMS               |
| top2lg2mean                                                            | 1.00000            | -0.36116<br>0.2487 |
| LCMS                                                                   | -0.36116<br>0.2487 | 1.00000            |

| Pearson Correlation Statistics (Fisher's z Transformation) |               |    |                    |            |                 |                      |                       |          |                      |
|------------------------------------------------------------|---------------|----|--------------------|------------|-----------------|----------------------|-----------------------|----------|----------------------|
| Variable                                                   | With Variable | N  | Sample Correlation | Fisher's z | Bias Adjustment | Correlation Estimate | 95% Confidence Limits |          | p Value for H0:Rho=0 |
| top2lg2mean                                                | LCMS          | 12 | -0.36116           | -0.37822   | -0.01642        | -0.34680             | -0.767872             | 0.283535 | 0.2565               |

**Correlation C\_pooltop2lg2mean\_tp2 symbol LCMS**

**The CORR Procedure**

**Gene\_Symbol=RBP4**

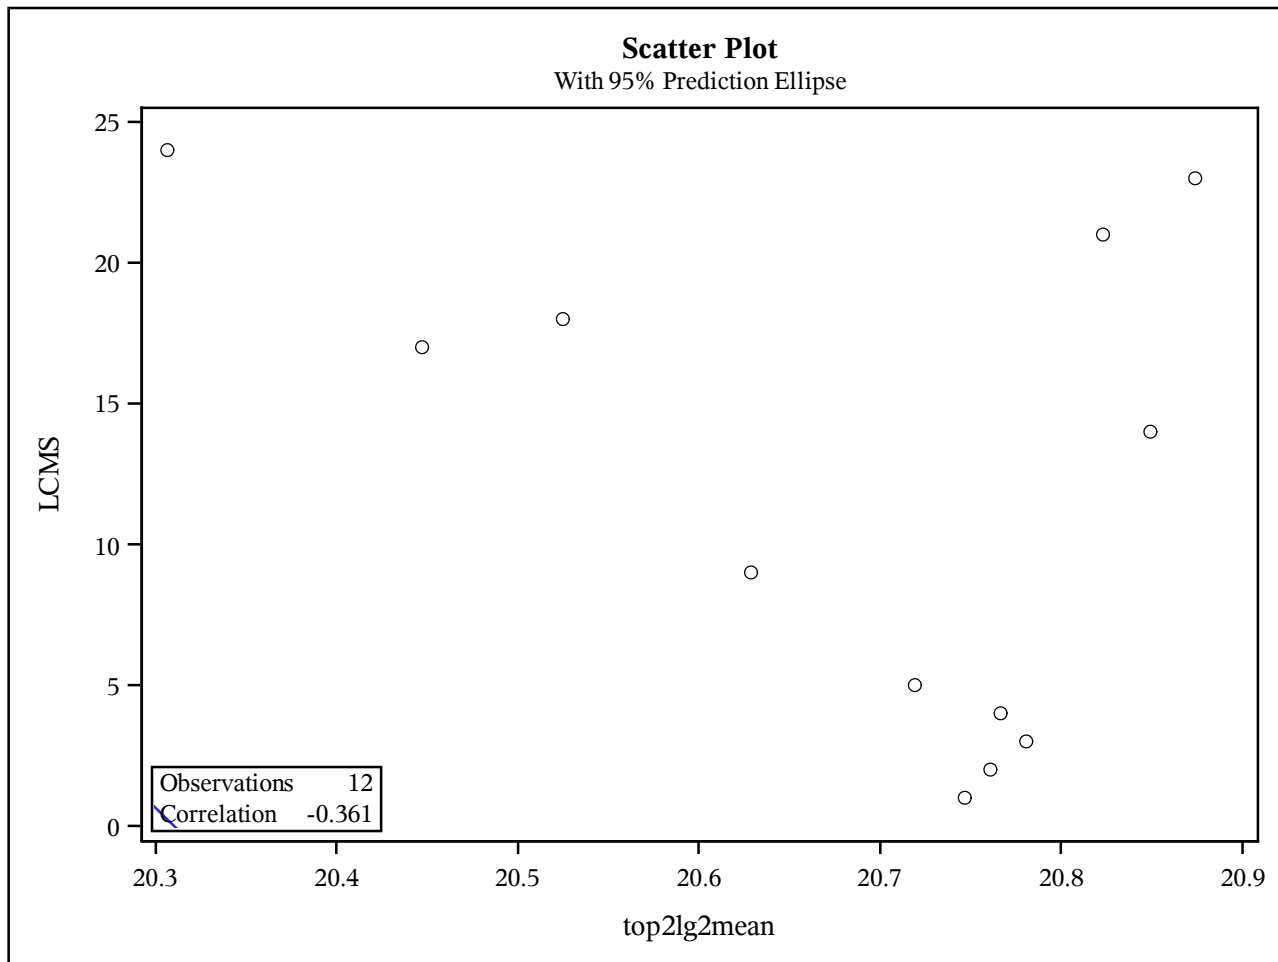

**Correlation C\_pooltop2lg2mean\_tp2 symbol LCMS****The CORR Procedure**

Gene\_Symbol=RNASE1

2 Variables: top2lg2mean LCMS

| Simple Statistics |    |          |         |           |          |          |
|-------------------|----|----------|---------|-----------|----------|----------|
| Variable          | N  | Mean     | Std Dev | Sum       | Minimum  | Maximum  |
| top2lg2mean       | 12 | 22.32073 | 0.75803 | 267.84872 | 21.06036 | 23.40056 |
| LCMS              | 12 | 11.75000 | 8.70867 | 141.00000 | 1.00000  | 24.00000 |

| Pearson Correlation Coefficients, N = 12<br>Prob >  r  under H0: Rho=0 |                    |                    |
|------------------------------------------------------------------------|--------------------|--------------------|
|                                                                        | top2lg2mean        | LCMS               |
| top2lg2mean                                                            | 1.00000            | -0.69058<br>0.0129 |
| LCMS                                                                   | -0.69058<br>0.0129 | 1.00000            |

| Pearson Correlation Statistics (Fisher's z Transformation) |               |    |                    |            |                 |                      |                       |           |                      |
|------------------------------------------------------------|---------------|----|--------------------|------------|-----------------|----------------------|-----------------------|-----------|----------------------|
| Variable                                                   | With Variable | N  | Sample Correlation | Fisher's z | Bias Adjustment | Correlation Estimate | 95% Confidence Limits |           | p Value for H0:Rho=0 |
| top2lg2mean                                                | LCMS          | 12 | -0.69058           | -0.84906   | -0.03139        | -0.67380             | -0.899767             | -0.162888 | 0.0109               |

**Correlation C\_pooltop2lg2mean\_tp2 symbol LCMS**

**The CORR Procedure**

**Gene\_Symbol=RNASE1**

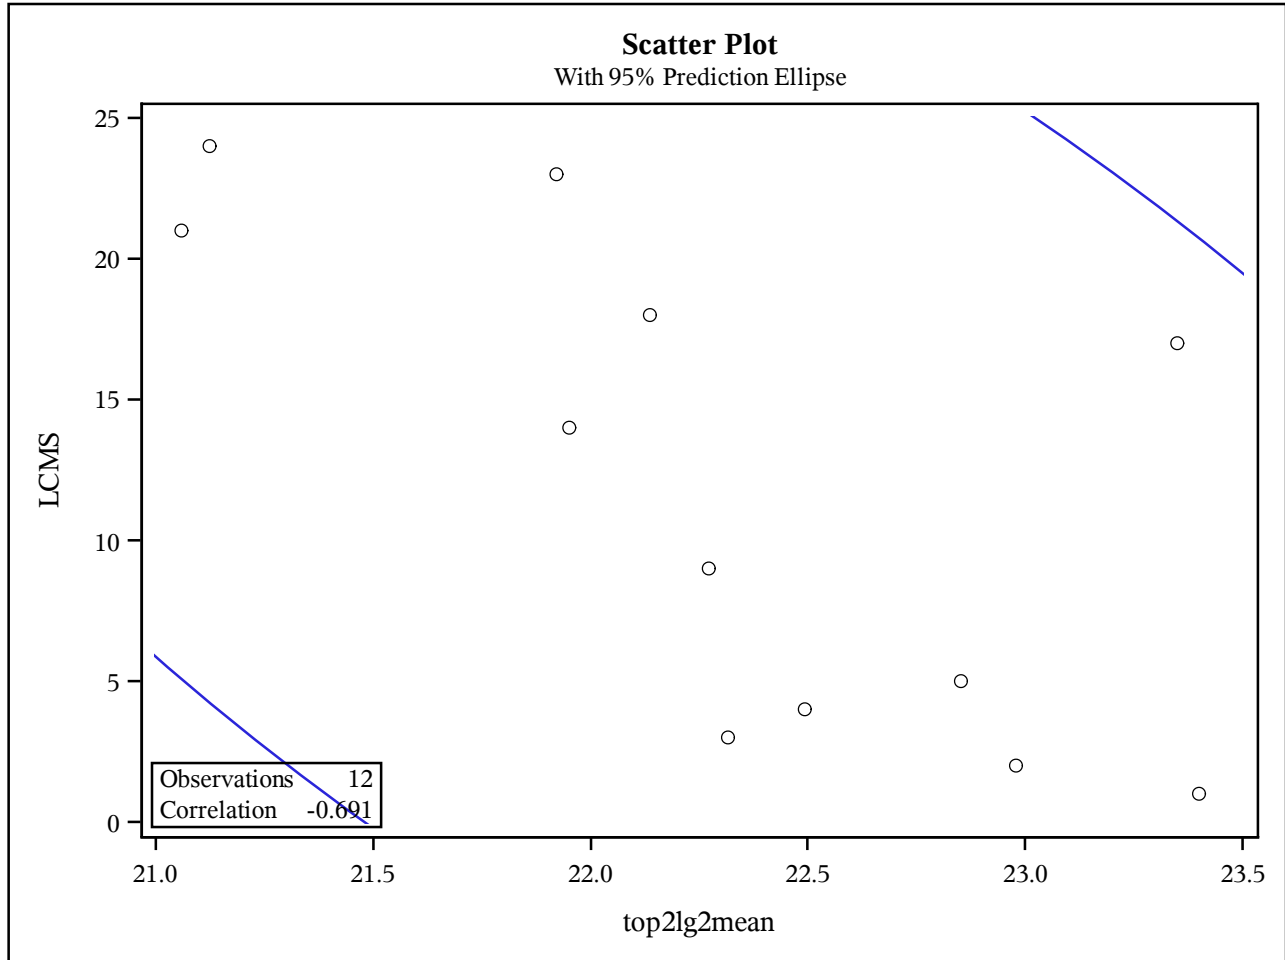



**Correlation C\_pooltop2lg2mean\_tp2 symbol LCMS****The CORR Procedure**

Gene\_Symbol=SCG3

2 Variables: top2lg2mean LCMS

| Simple Statistics |    |          |         |           |          |          |
|-------------------|----|----------|---------|-----------|----------|----------|
| Variable          | N  | Mean     | Std Dev | Sum       | Minimum  | Maximum  |
| top2lg2mean       | 12 | 20.88501 | 0.26995 | 250.62014 | 20.48278 | 21.33450 |
| LCMS              | 12 | 11.75000 | 8.70867 | 141.00000 | 1.00000  | 24.00000 |

| Pearson Correlation Coefficients, N = 12<br>Prob >  r  under H0: Rho=0 |                   |                   |
|------------------------------------------------------------------------|-------------------|-------------------|
|                                                                        | top2lg2mean       | LCMS              |
| top2lg2mean                                                            | 1.00000           | 0.13792<br>0.6691 |
| LCMS                                                                   | 0.13792<br>0.6691 | 1.00000           |

**Pearson Correlation Statistics (Fisher's z Transformation)**

| Variable    | With Variable | N  | Sample Correlation | Fisher's z | Bias Adjustment | Correlation Estimate | 95% Confidence Limits |          | p Value for H0:Rho=0 |
|-------------|---------------|----|--------------------|------------|-----------------|----------------------|-----------------------|----------|----------------------|
| top2lg2mean | LCMS          | 12 | 0.13792            | 0.13880    | 0.00627         | 0.13176              | -0.478308             | 0.656054 | 0.6771               |

**Correlation C\_pooltop2lg2mean\_tp2 symbol LCMS**

**The CORR Procedure**

Gene\_Symbol=SCG3

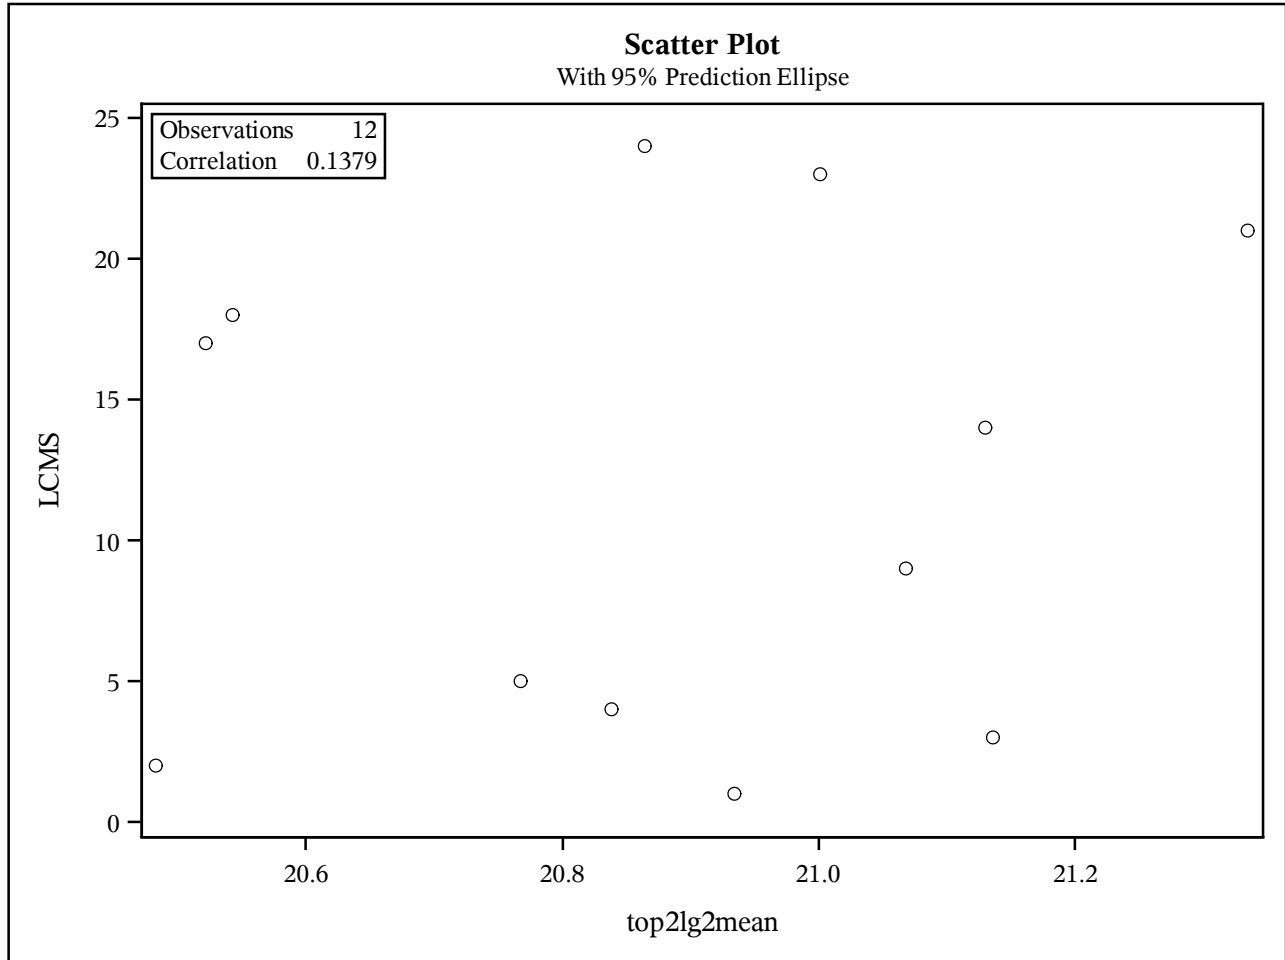

**Correlation C\_pooltop2lg2mean\_tp2 symbol LCMS****The CORR Procedure**

Gene\_Symbol=SERPINA3

2 Variables: top2lg2mean LCMS

| Simple Statistics |    |          |         |           |          |          |
|-------------------|----|----------|---------|-----------|----------|----------|
| Variable          | N  | Mean     | Std Dev | Sum       | Minimum  | Maximum  |
| top2lg2mean       | 12 | 22.62516 | 0.32380 | 271.50187 | 22.10855 | 23.09064 |
| LCMS              | 12 | 11.75000 | 8.70867 | 141.00000 | 1.00000  | 24.00000 |

| Pearson Correlation Coefficients, N = 12<br>Prob >  r  under H0: Rho=0 |                   |                   |
|------------------------------------------------------------------------|-------------------|-------------------|
|                                                                        | top2lg2mean       | LCMS              |
| top2lg2mean                                                            | 1.00000           | 0.59672<br>0.0405 |
| LCMS                                                                   | 0.59672<br>0.0405 | 1.00000           |

**Pearson Correlation Statistics (Fisher's z Transformation)**

| Variable    | With Variable | N  | Sample Correlation | Fisher's z | Bias Adjustment | Correlation Estimate | 95% Confidence Limits |          | p Value for H0:Rho=0 |
|-------------|---------------|----|--------------------|------------|-----------------|----------------------|-----------------------|----------|----------------------|
| top2lg2mean | LCMS          | 12 | 0.59672            | 0.68803    | 0.02712         | 0.57897              | 0.007589              | 0.865342 | 0.0390               |

**Correlation C\_pooltop2lg2mean\_tp2 symbol LCMS**

**The CORR Procedure**

Gene\_Symbol=SERPINA3

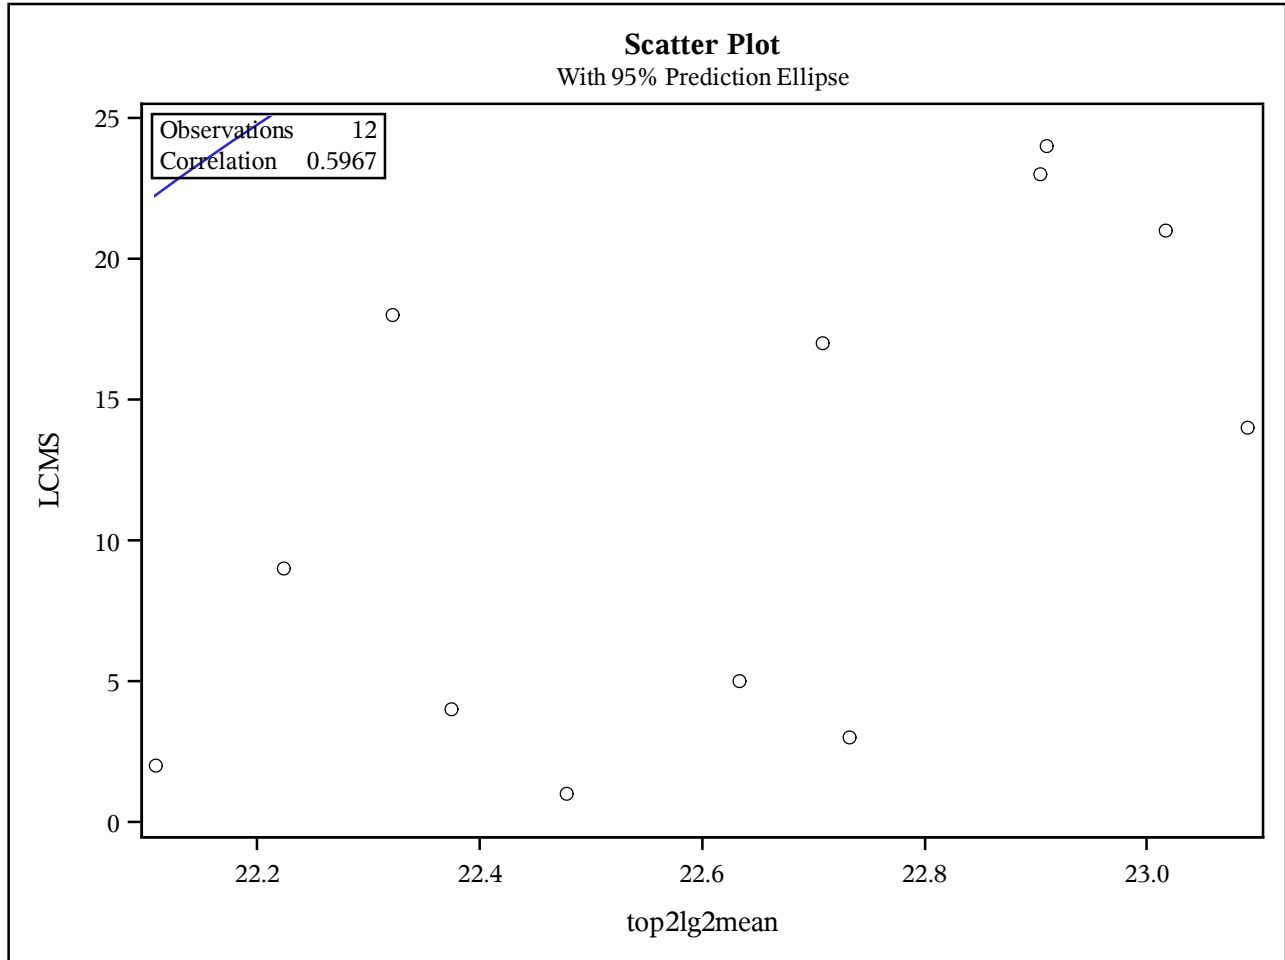

**Correlation C\_pooltop2lg2mean\_tp2 symbol LCMS****The CORR Procedure**

Gene\_Symbol=SERPINC1

2 Variables: top2lg2mean LCMS

| Simple Statistics |    |          |         |           |          |          |
|-------------------|----|----------|---------|-----------|----------|----------|
| Variable          | N  | Mean     | Std Dev | Sum       | Minimum  | Maximum  |
| top2lg2mean       | 12 | 21.46794 | 0.16544 | 257.61532 | 21.17691 | 21.68697 |
| LCMS              | 12 | 11.75000 | 8.70867 | 141.00000 | 1.00000  | 24.00000 |

| Pearson Correlation Coefficients, N = 12<br>Prob >  r  under H0: Rho=0 |                   |                   |
|------------------------------------------------------------------------|-------------------|-------------------|
|                                                                        | top2lg2mean       | LCMS              |
| top2lg2mean                                                            | 1.00000           | 0.55169<br>0.0629 |
| LCMS                                                                   | 0.55169<br>0.0629 | 1.00000           |

| Pearson Correlation Statistics (Fisher's z Transformation) |               |    |                    |            |                 |                      |                       |          |                      |
|------------------------------------------------------------|---------------|----|--------------------|------------|-----------------|----------------------|-----------------------|----------|----------------------|
| Variable                                                   | With Variable | N  | Sample Correlation | Fisher's z | Bias Adjustment | Correlation Estimate | 95% Confidence Limits |          | p Value for H0:Rho=0 |
| top2lg2mean                                                | LCMS          | 12 | 0.55169            | 0.62081    | 0.02508         | 0.53401              | -0.057525             | 0.848018 | 0.0625               |

**Correlation C\_pooltop2lg2mean\_tp2 symbol LCMS**

**The CORR Procedure**

Gene\_Symbol=SERPINC1

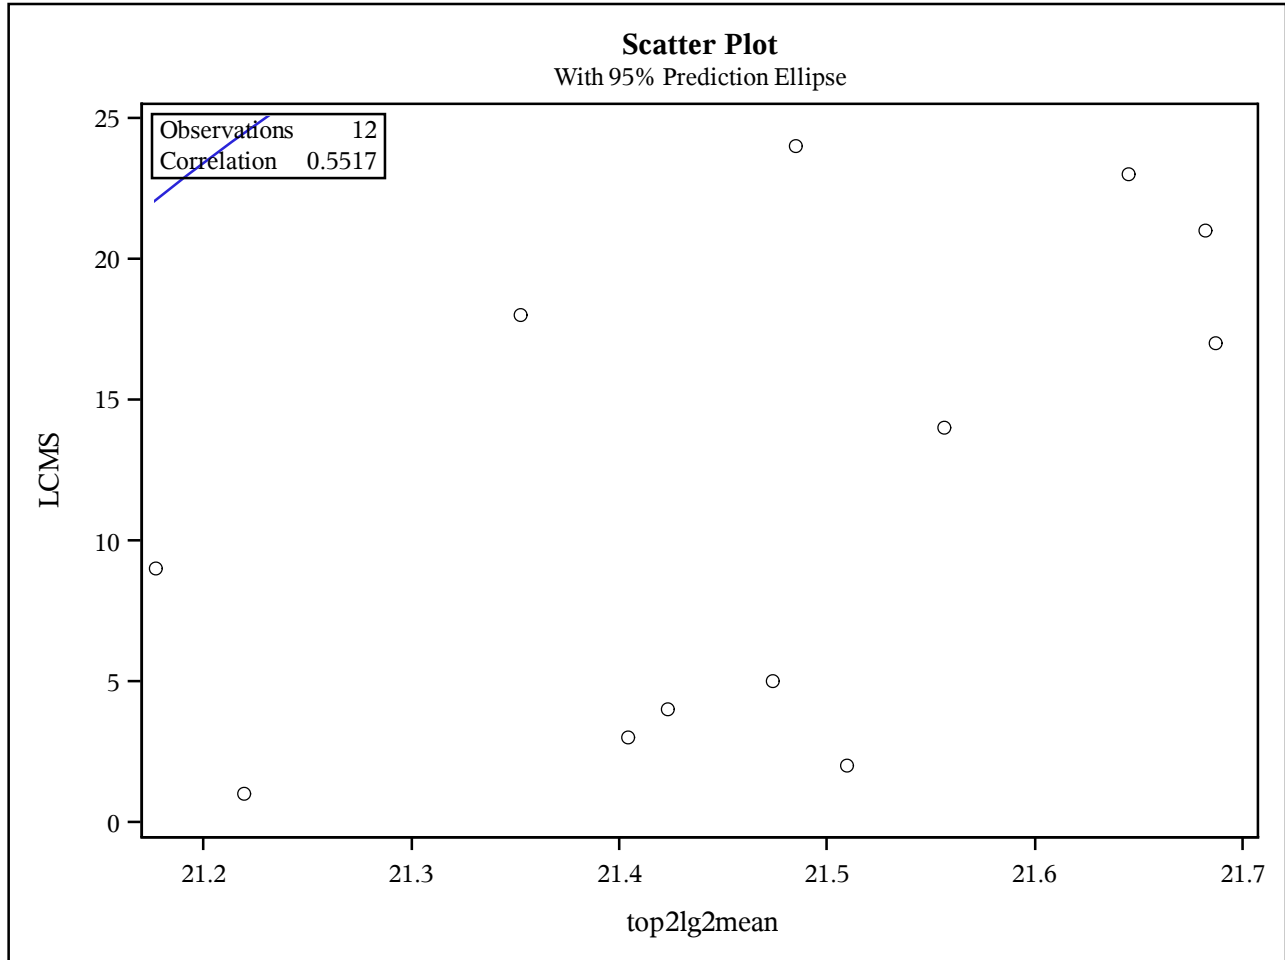

**Correlation C\_pooltop2lg2mean\_tp2 symbol LCMS****The CORR Procedure**

Gene\_Symbol=SERPIND1

2 Variables: top2lg2mean LCMS

| Simple Statistics |    |          |         |           |          |          |
|-------------------|----|----------|---------|-----------|----------|----------|
| Variable          | N  | Mean     | Std Dev | Sum       | Minimum  | Maximum  |
| top2lg2mean       | 12 | 17.67289 | 0.55318 | 212.07465 | 16.75935 | 18.49608 |
| LCMS              | 12 | 11.75000 | 8.70867 | 141.00000 | 1.00000  | 24.00000 |

| Pearson Correlation Coefficients, N = 12<br>Prob >  r  under H0: Rho=0 |                   |                   |
|------------------------------------------------------------------------|-------------------|-------------------|
|                                                                        | top2lg2mean       | LCMS              |
| top2lg2mean                                                            | 1.00000           | 0.46294<br>0.1296 |
| LCMS                                                                   | 0.46294<br>0.1296 | 1.00000           |

**Pearson Correlation Statistics (Fisher's z Transformation)**

| Variable    | With Variable | N  | Sample Correlation | Fisher's z | Bias Adjustment | Correlation Estimate | 95% Confidence Limits |          | p Value for H0:Rho=0 |
|-------------|---------------|----|--------------------|------------|-----------------|----------------------|-----------------------|----------|----------------------|
| top2lg2mean | LCMS          | 12 | 0.46294            | 0.50105    | 0.02104         | 0.44625              | -0.171603             | 0.812154 | 0.1328               |

**Correlation C\_pooltop2lg2mean\_tp2 symbol LCMS**

**The CORR Procedure**

Gene\_Symbol=SERPIND1

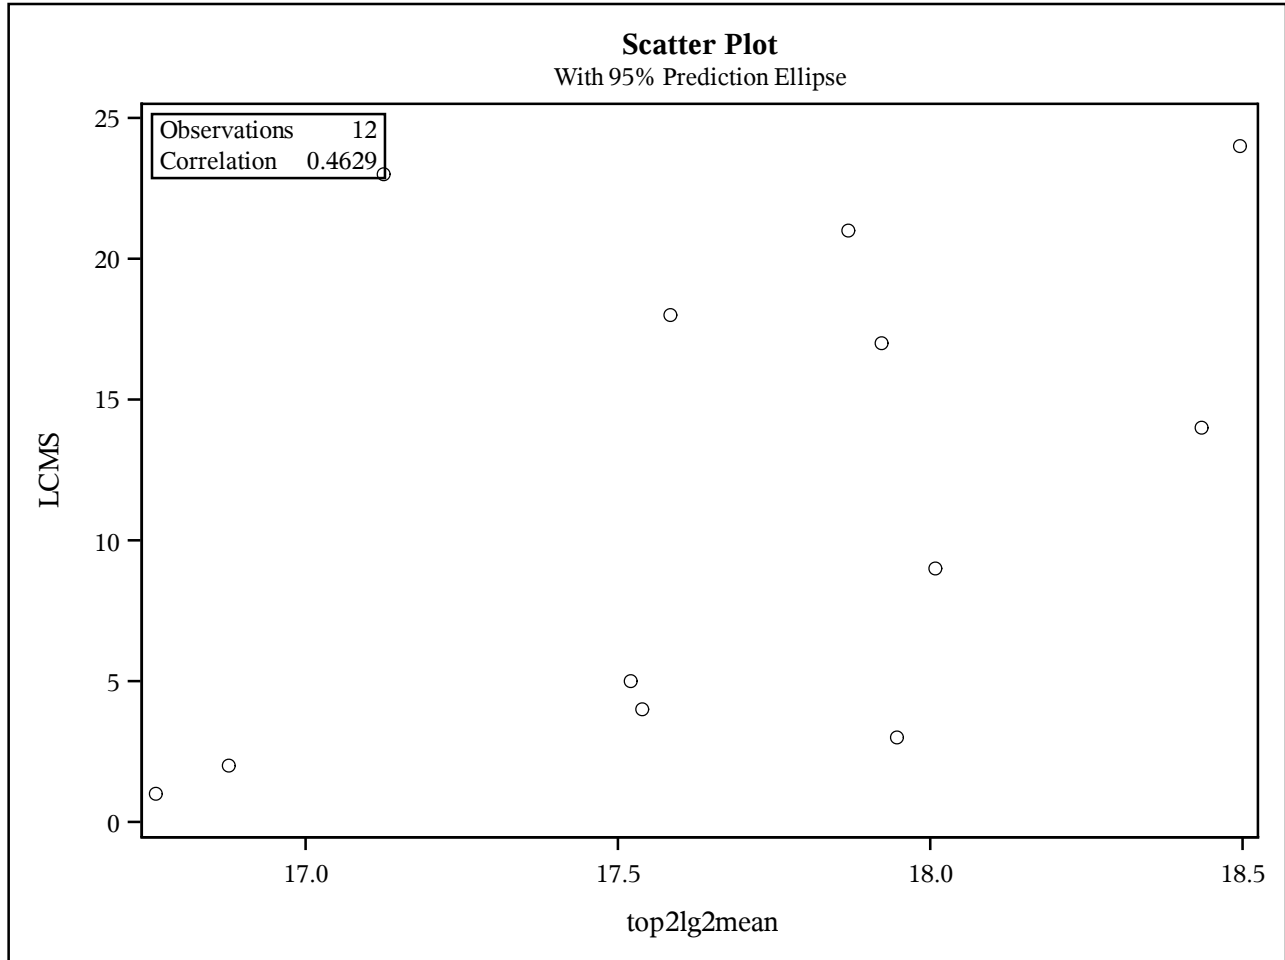



**Correlation C\_pooltop2lg2mean\_tp2 symbol LCMS****The CORR Procedure**

Gene\_Symbol=SERPINF1

2 Variables: top2lg2mean LCMS

| Simple Statistics |    |          |         |           |          |          |
|-------------------|----|----------|---------|-----------|----------|----------|
| Variable          | N  | Mean     | Std Dev | Sum       | Minimum  | Maximum  |
| top2lg2mean       | 12 | 22.95120 | 0.25443 | 275.41434 | 22.55917 | 23.56111 |
| LCMS              | 12 | 11.75000 | 8.70867 | 141.00000 | 1.00000  | 24.00000 |

| Pearson Correlation Coefficients, N = 12<br>Prob >  r  under H0: Rho=0 |                   |                   |
|------------------------------------------------------------------------|-------------------|-------------------|
|                                                                        | top2lg2mean       | LCMS              |
| top2lg2mean                                                            | 1.00000           | 0.36005<br>0.2503 |
| LCMS                                                                   | 0.36005<br>0.2503 | 1.00000           |

**Pearson Correlation Statistics (Fisher's z Transformation)**

| Variable    | With Variable | N  | Sample Correlation | Fisher's z | Bias Adjustment | Correlation Estimate | 95% Confidence Limits |          | p Value for H0:Rho=0 |
|-------------|---------------|----|--------------------|------------|-----------------|----------------------|-----------------------|----------|----------------------|
| top2lg2mean | LCMS          | 12 | 0.36005            | 0.37694    | 0.01637         | 0.34572              | -0.284663             | 0.767368 | 0.2581               |

**Correlation C\_pooltop2lg2mean\_tp2 symbol LCMS**

**The CORR Procedure**

Gene\_Symbol=SERPINF1

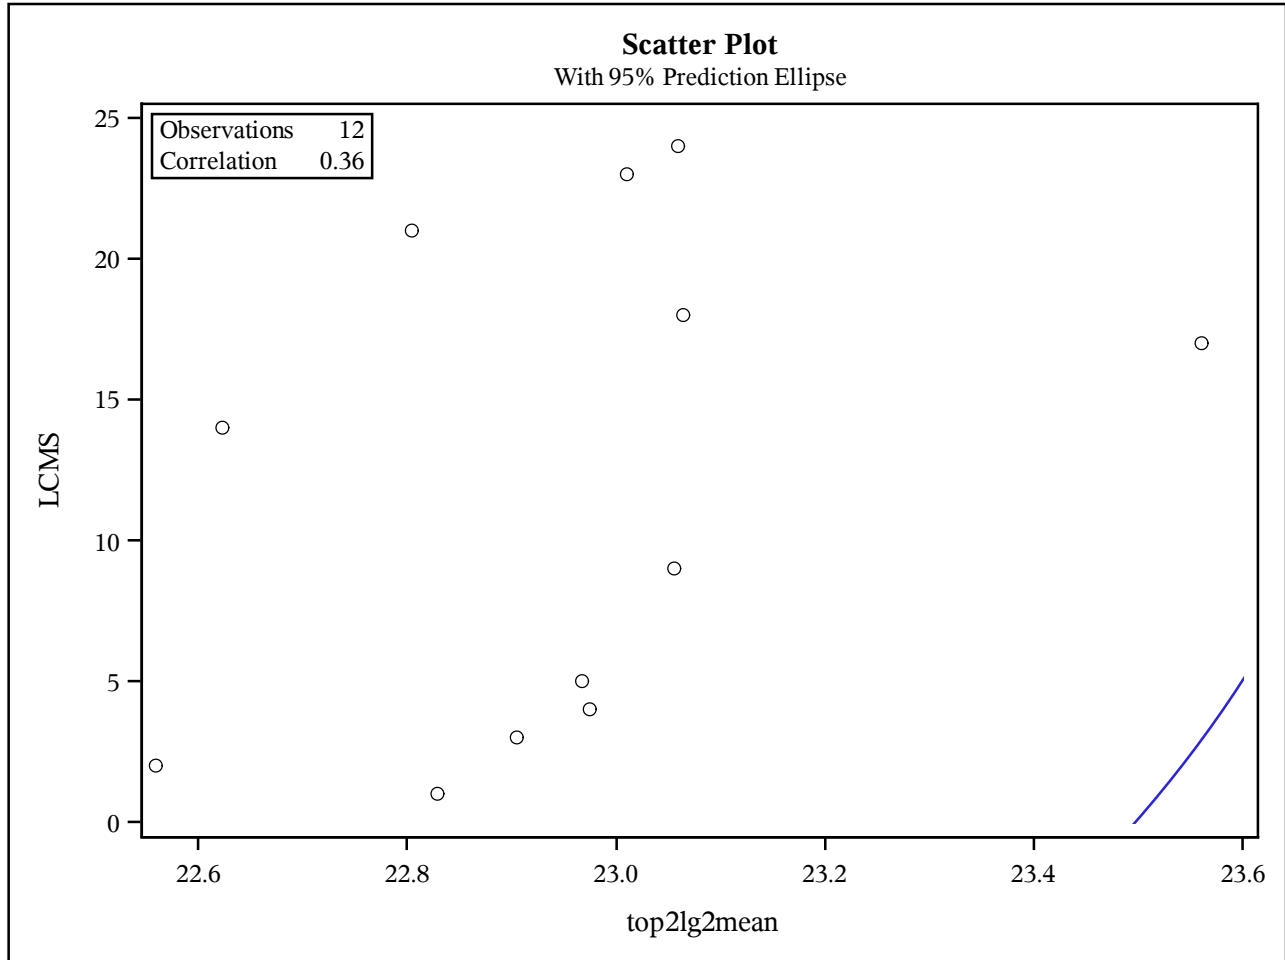

**Correlation C\_pooltop2lg2mean\_tp2 symbol LCMS****The CORR Procedure**

Gene\_Symbol=SERPING1

2 Variables: top2lg2mean LCMS

| Simple Statistics |    |          |         |           |          |          |
|-------------------|----|----------|---------|-----------|----------|----------|
| Variable          | N  | Mean     | Std Dev | Sum       | Minimum  | Maximum  |
| top2lg2mean       | 12 | 21.81399 | 0.49183 | 261.76791 | 20.79293 | 22.57029 |
| LCMS              | 12 | 11.75000 | 8.70867 | 141.00000 | 1.00000  | 24.00000 |

| Pearson Correlation Coefficients, N = 12<br>Prob >  r  under H0: Rho=0 |                   |                   |
|------------------------------------------------------------------------|-------------------|-------------------|
|                                                                        | top2lg2mean       | LCMS              |
| top2lg2mean                                                            | 1.00000           | 0.48380<br>0.1110 |
| LCMS                                                                   | 0.48380<br>0.1110 | 1.00000           |

| Pearson Correlation Statistics (Fisher's z Transformation) |               |    |                    |            |                 |                      |                       |          |                      |
|------------------------------------------------------------|---------------|----|--------------------|------------|-----------------|----------------------|-----------------------|----------|----------------------|
| Variable                                                   | With Variable | N  | Sample Correlation | Fisher's z | Bias Adjustment | Correlation Estimate | 95% Confidence Limits |          | p Value for H0:Rho=0 |
| top2lg2mean                                                | LCMS          | 12 | 0.48380            | 0.52794    | 0.02199         | 0.46678              | -0.146317             | 0.820801 | 0.1132               |

### Correlation C\_pooltop2lg2mean\_tp2 symbol LCMS

#### The CORR Procedure

Gene\_Symbol=SERPING1

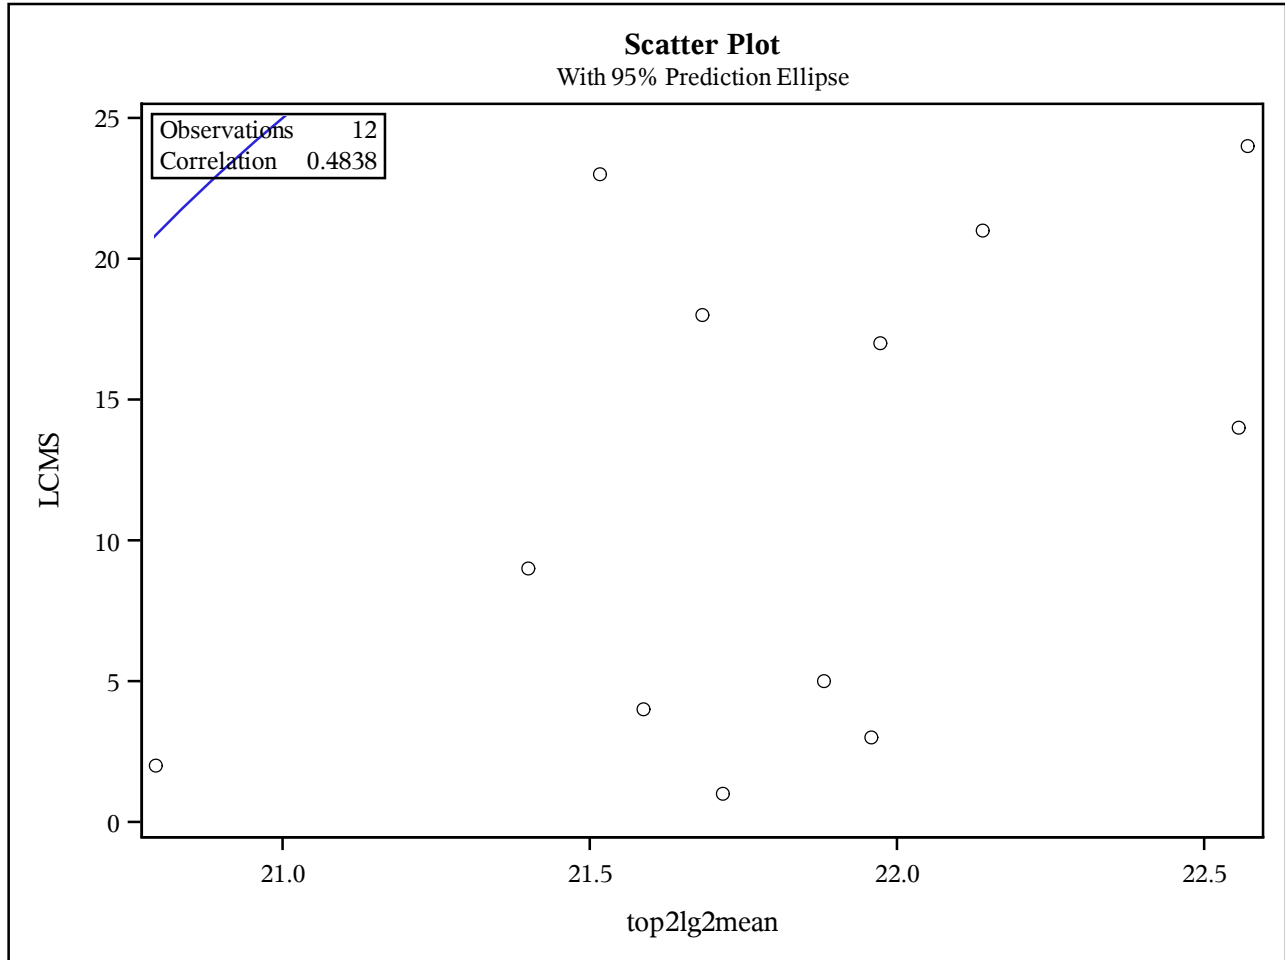

**Correlation C\_pooltop2lg2mean\_tp2 symbol LCMS****The CORR Procedure**

Gene\_Symbol=SIRPA

2 Variables: top2lg2mean LCMS

| Simple Statistics |    |          |         |           |          |          |
|-------------------|----|----------|---------|-----------|----------|----------|
| Variable          | N  | Mean     | Std Dev | Sum       | Minimum  | Maximum  |
| top2lg2mean       | 12 | 18.70502 | 0.32043 | 224.46021 | 18.32002 | 19.31147 |
| LCMS              | 12 | 11.75000 | 8.70867 | 141.00000 | 1.00000  | 24.00000 |

| Pearson Correlation Coefficients, N = 12<br>Prob >  r  under H0: Rho=0 |                    |                    |
|------------------------------------------------------------------------|--------------------|--------------------|
|                                                                        | top2lg2mean        | LCMS               |
| top2lg2mean                                                            | 1.00000            | -0.14800<br>0.6462 |
| LCMS                                                                   | -0.14800<br>0.6462 | 1.00000            |

| Pearson Correlation Statistics (Fisher's z Transformation) |               |    |                    |            |                 |                      |                       |          |                      |
|------------------------------------------------------------|---------------|----|--------------------|------------|-----------------|----------------------|-----------------------|----------|----------------------|
| Variable                                                   | With Variable | N  | Sample Correlation | Fisher's z | Bias Adjustment | Correlation Estimate | 95% Confidence Limits |          | p Value for H0:Rho=0 |
| top2lg2mean                                                | LCMS          | 12 | -0.14800           | -0.14910   | -0.00673        | -0.14141             | -0.661620             | 0.470687 | 0.6547               |

**Correlation C\_pooltop2lg2mean\_tp2 symbol LCMS**

**The CORR Procedure**

Gene\_Symbol=SIRPA

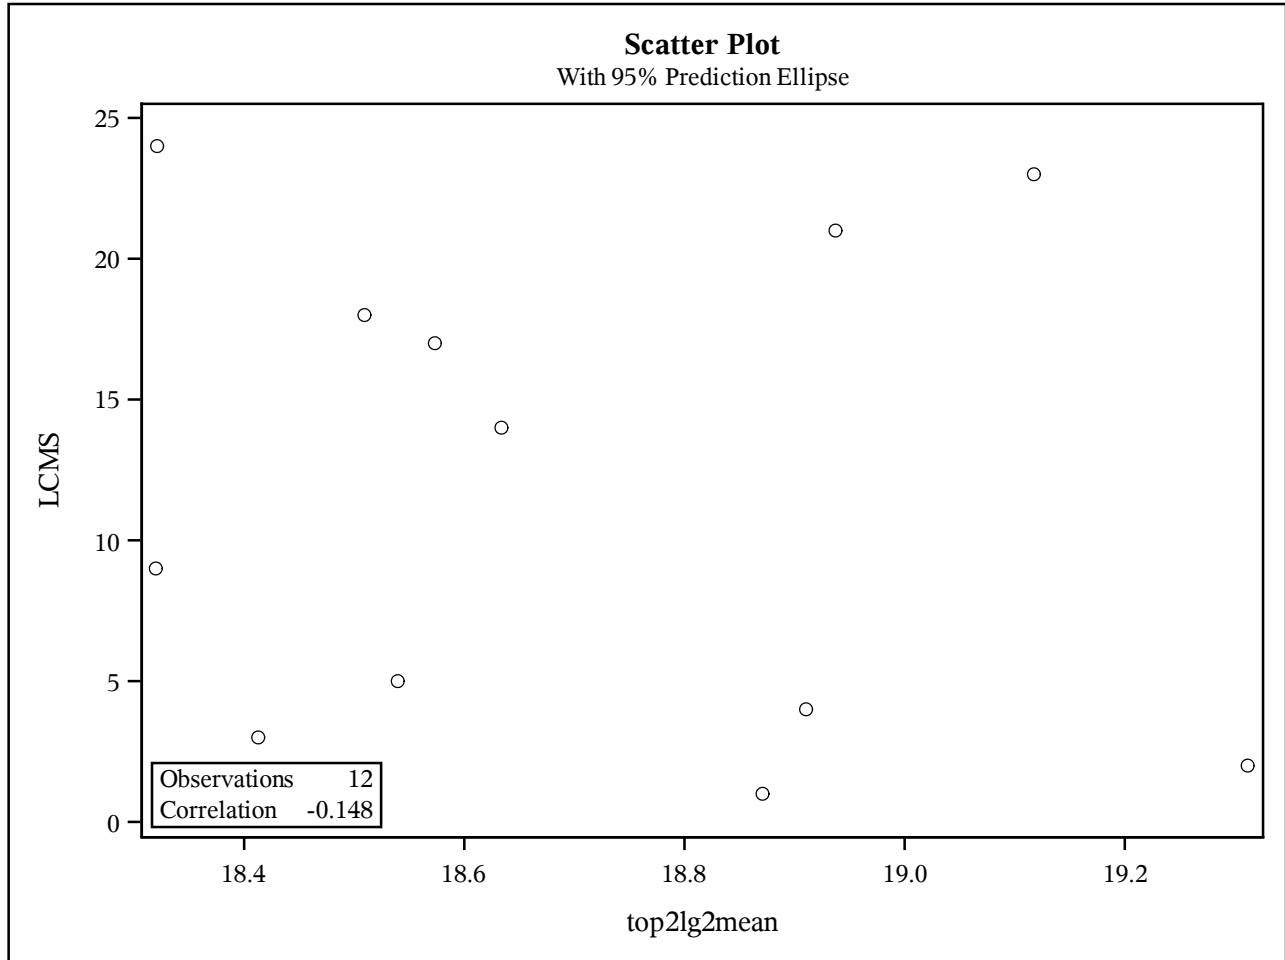

**Correlation C\_pooltop2lg2mean\_tp2 symbol LCMS****The CORR Procedure**

Gene\_Symbol=SOD1

2 Variables: top2lg2mean LCMS

| Simple Statistics |    |          |         |           |          |          |
|-------------------|----|----------|---------|-----------|----------|----------|
| Variable          | N  | Mean     | Std Dev | Sum       | Minimum  | Maximum  |
| top2lg2mean       | 12 | 23.16349 | 0.19007 | 277.96185 | 22.94400 | 23.52580 |
| LCMS              | 12 | 11.75000 | 8.70867 | 141.00000 | 1.00000  | 24.00000 |

| Pearson Correlation Coefficients, N = 12<br>Prob >  r  under H0: Rho=0 |                    |                    |
|------------------------------------------------------------------------|--------------------|--------------------|
|                                                                        | top2lg2mean        | LCMS               |
| top2lg2mean                                                            | 1.00000            | -0.57125<br>0.0524 |
| LCMS                                                                   | -0.57125<br>0.0524 | 1.00000            |

**Pearson Correlation Statistics (Fisher's z Transformation)**

| Variable    | With Variable | N  | Sample Correlation | Fisher's z | Bias Adjustment | Correlation Estimate | 95% Confidence Limits |          | p Value for H0:Rho=0 |
|-------------|---------------|----|--------------------|------------|-----------------|----------------------|-----------------------|----------|----------------------|
| top2lg2mean | LCMS          | 12 | -0.57125           | -0.64938   | -0.02597        | -0.55350             | -0.855613             | 0.029898 | 0.0514               |

**Correlation C\_pooltop2lg2mean\_tp2 symbol LCMS**

**The CORR Procedure**

Gene\_Symbol=SOD1

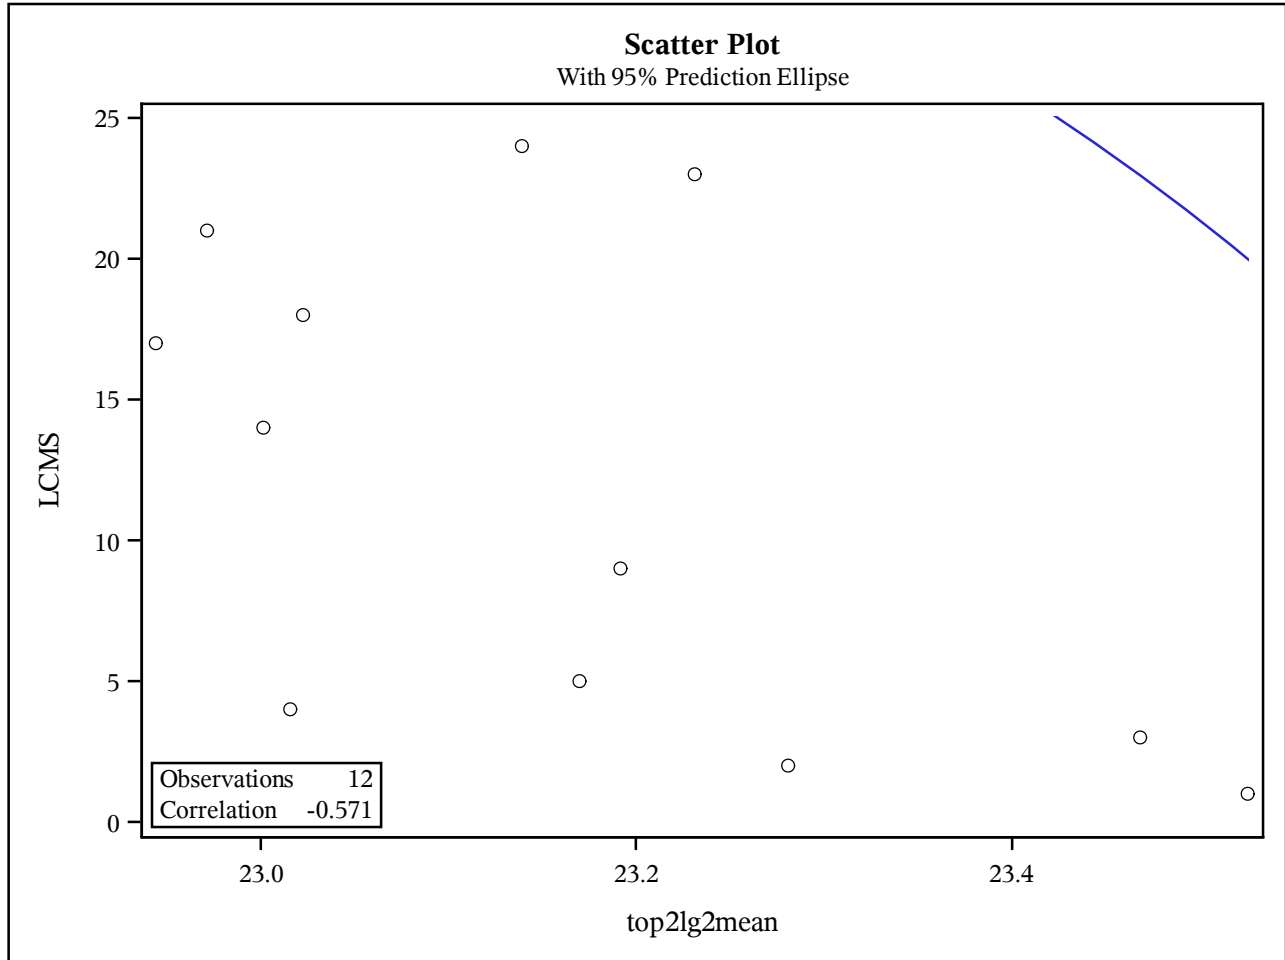



**Correlation C\_pooltop2lg2mean\_tp2 symbol LCMS****The CORR Procedure**

Gene\_Symbol=SOD3

2 Variables: top2lg2mean LCMS

| Simple Statistics |    |          |         |           |          |          |
|-------------------|----|----------|---------|-----------|----------|----------|
| Variable          | N  | Mean     | Std Dev | Sum       | Minimum  | Maximum  |
| top2lg2mean       | 12 | 20.89297 | 0.47158 | 250.71558 | 19.97754 | 21.33323 |
| LCMS              | 12 | 11.75000 | 8.70867 | 141.00000 | 1.00000  | 24.00000 |

| Pearson Correlation Coefficients, N = 12<br>Prob >  r  under H0: Rho=0 |                    |                    |
|------------------------------------------------------------------------|--------------------|--------------------|
|                                                                        | top2lg2mean        | LCMS               |
| top2lg2mean                                                            | 1.00000            | -0.53066<br>0.0759 |
| LCMS                                                                   | -0.53066<br>0.0759 | 1.00000            |

| Pearson Correlation Statistics (Fisher's z Transformation) |               |    |                    |            |                 |                      |                       |          |                      |
|------------------------------------------------------------|---------------|----|--------------------|------------|-----------------|----------------------|-----------------------|----------|----------------------|
| Variable                                                   | With Variable | N  | Sample Correlation | Fisher's z | Bias Adjustment | Correlation Estimate | 95% Confidence Limits |          | p Value for H0:Rho=0 |
| top2lg2mean                                                | LCMS          | 12 | -0.53066           | -0.59106   | -0.02412        | -0.51311             | -0.839731             | 0.086169 | 0.0762               |

**Correlation C\_pooltop2lg2mean\_tp2 symbol LCMS**

**The CORR Procedure**

**Gene\_Symbol=SOD3**

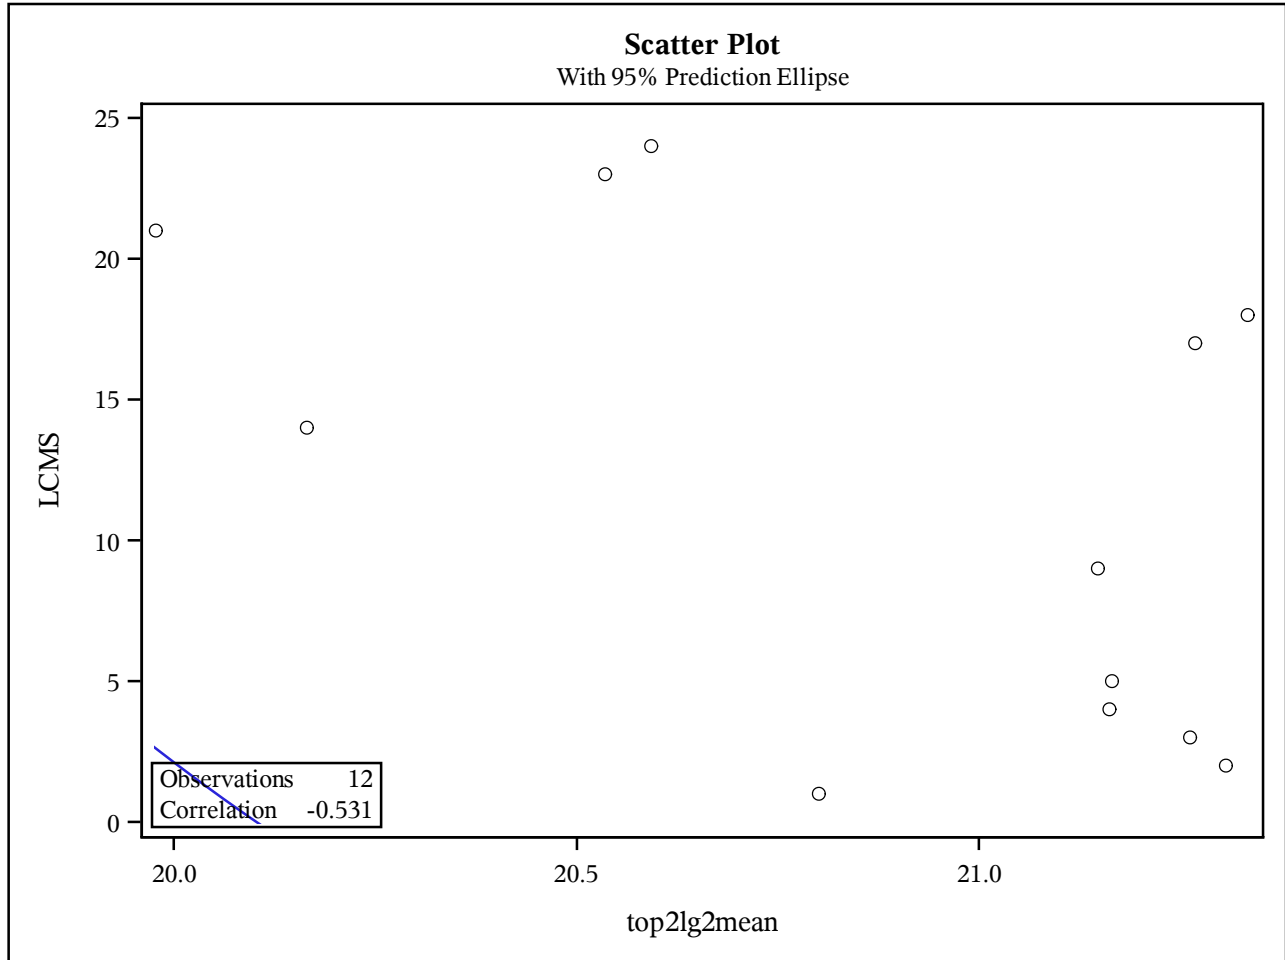

**Correlation C\_pooltop2lg2mean\_tp2 symbol LCMS****The CORR Procedure**

Gene\_Symbol=SPARCL1

2 Variables: top2lg2mean LCMS

| Simple Statistics |    |          |         |           |          |          |
|-------------------|----|----------|---------|-----------|----------|----------|
| Variable          | N  | Mean     | Std Dev | Sum       | Minimum  | Maximum  |
| top2lg2mean       | 12 | 21.56743 | 0.29155 | 258.80916 | 20.82870 | 22.02751 |
| LCMS              | 12 | 11.75000 | 8.70867 | 141.00000 | 1.00000  | 24.00000 |

| Pearson Correlation Coefficients, N = 12<br>Prob >  r  under H0: Rho=0 |                   |                   |
|------------------------------------------------------------------------|-------------------|-------------------|
|                                                                        | top2lg2mean       | LCMS              |
| top2lg2mean                                                            | 1.00000           | 0.50771<br>0.0920 |
| LCMS                                                                   | 0.50771<br>0.0920 | 1.00000           |

**Pearson Correlation Statistics (Fisher's z Transformation)**

| Variable    | With Variable | N  | Sample Correlation | Fisher's z | Bias Adjustment | Correlation Estimate | 95% Confidence Limits |          | p Value for H0:Rho=0 |
|-------------|---------------|----|--------------------|------------|-----------------|----------------------|-----------------------|----------|----------------------|
| top2lg2mean | LCMS          | 12 | 0.50771            | 0.55965    | 0.02308         | 0.49039              | -0.116226             | 0.830544 | 0.0932               |

**Correlation C\_pooltop2lg2mean\_tp2 symbol LCMS**

**The CORR Procedure**

Gene\_Symbol=SPARCL1

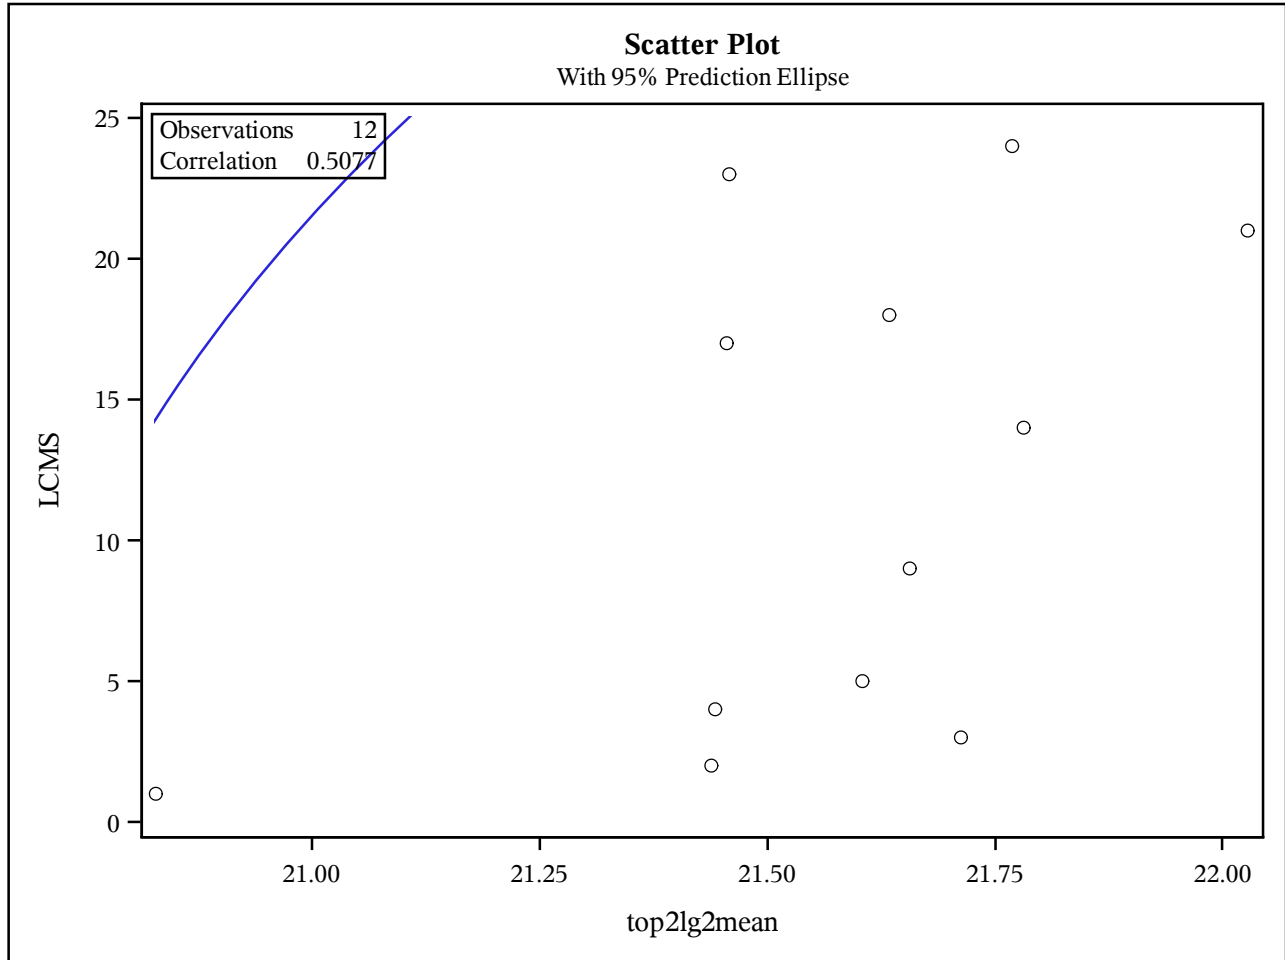

**Correlation C\_pooltop2lg2mean\_tp2 symbol LCMS****The CORR Procedure**

Gene\_Symbol=SPP1

2 Variables: top2lg2mean LCMS

| Simple Statistics |    |          |         |           |          |          |
|-------------------|----|----------|---------|-----------|----------|----------|
| Variable          | N  | Mean     | Std Dev | Sum       | Minimum  | Maximum  |
| top2lg2mean       | 12 | 21.53026 | 0.31804 | 258.36306 | 20.94234 | 21.95977 |
| LCMS              | 12 | 11.75000 | 8.70867 | 141.00000 | 1.00000  | 24.00000 |

| Pearson Correlation Coefficients, N = 12<br>Prob >  r  under H0: Rho=0 |                   |                   |
|------------------------------------------------------------------------|-------------------|-------------------|
|                                                                        | top2lg2mean       | LCMS              |
| top2lg2mean                                                            | 1.00000           | 0.27852<br>0.3807 |
| LCMS                                                                   | 0.27852<br>0.3807 | 1.00000           |

| Pearson Correlation Statistics (Fisher's z Transformation) |               |    |                    |            |                 |                      |                       |          |                      |
|------------------------------------------------------------|---------------|----|--------------------|------------|-----------------|----------------------|-----------------------|----------|----------------------|
| Variable                                                   | With Variable | N  | Sample Correlation | Fisher's z | Bias Adjustment | Correlation Estimate | 95% Confidence Limits |          | p Value for H0:Rho=0 |
| top2lg2mean                                                | LCMS          | 12 | 0.27852            | 0.28608    | 0.01266         | 0.26681              | -0.362621             | 0.729072 | 0.3908               |

**Correlation C\_pooltop2lg2mean\_tp2 symbol LCMS****The CORR Procedure**

Gene\_Symbol=SPP1

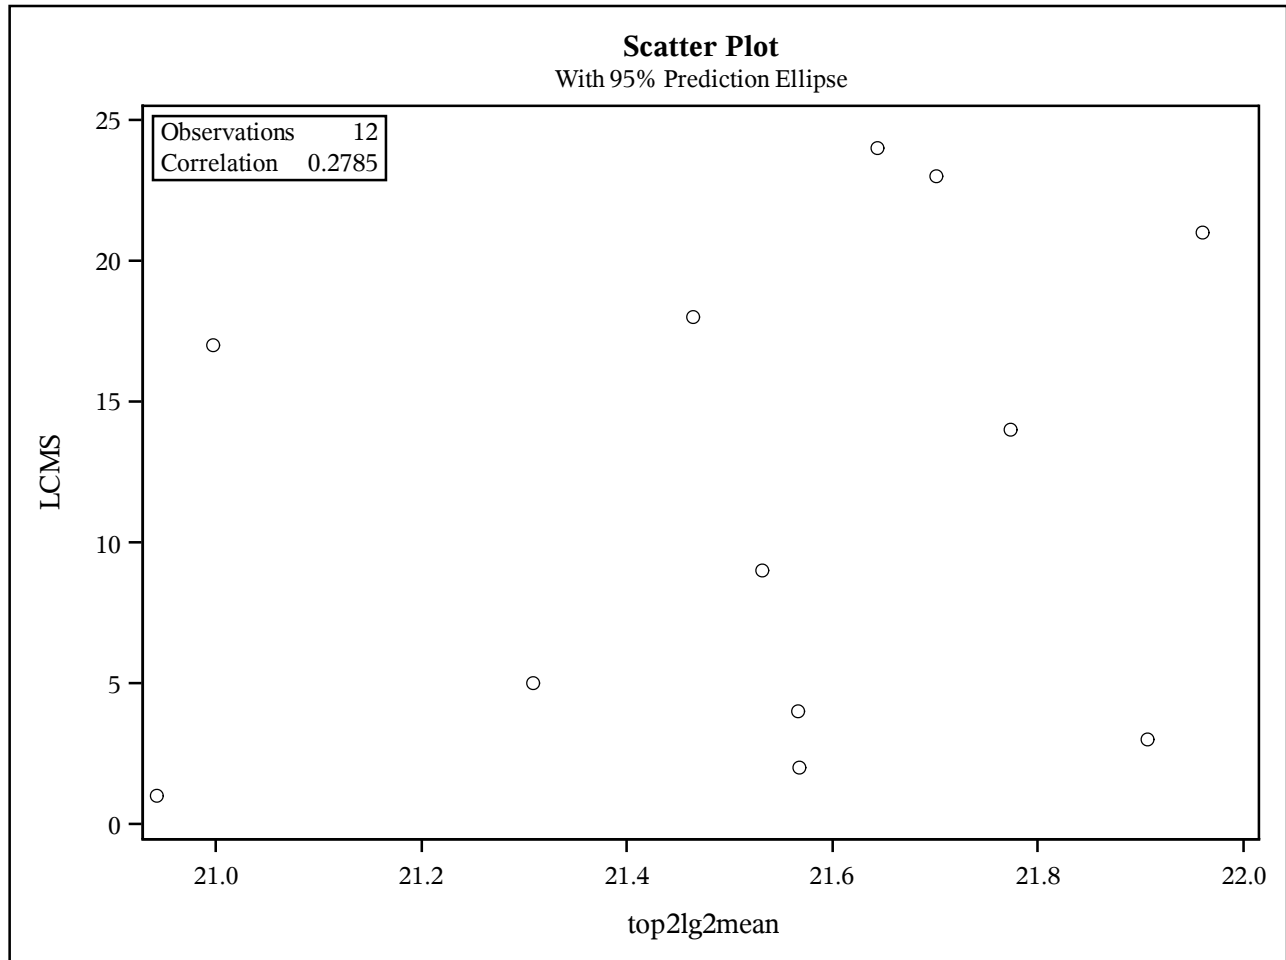

**Correlation C\_pooltop2lg2mean\_tp2 symbol LCMS****The CORR Procedure**

Gene\_Symbol=THY1

2 Variables: top2lg2mean LCMS

| Simple Statistics |    |          |         |           |          |          |
|-------------------|----|----------|---------|-----------|----------|----------|
| Variable          | N  | Mean     | Std Dev | Sum       | Minimum  | Maximum  |
| top2lg2mean       | 12 | 21.42731 | 0.30687 | 257.12772 | 20.79614 | 21.87430 |
| LCMS              | 12 | 11.75000 | 8.70867 | 141.00000 | 1.00000  | 24.00000 |

| Pearson Correlation Coefficients, N = 12<br>Prob >  r  under H0: Rho=0 |                   |                   |
|------------------------------------------------------------------------|-------------------|-------------------|
|                                                                        | top2lg2mean       | LCMS              |
| top2lg2mean                                                            | 1.00000           | 0.07268<br>0.8224 |
| LCMS                                                                   | 0.07268<br>0.8224 | 1.00000           |

| Pearson Correlation Statistics (Fisher's z Transformation) |               |    |                    |            |                 |                      |                       |          |                      |
|------------------------------------------------------------|---------------|----|--------------------|------------|-----------------|----------------------|-----------------------|----------|----------------------|
| Variable                                                   | With Variable | N  | Sample Correlation | Fisher's z | Bias Adjustment | Correlation Estimate | 95% Confidence Limits |          | p Value for H0:Rho=0 |
| top2lg2mean                                                | LCMS          | 12 | 0.07268            | 0.07281    | 0.00330         | 0.06939              | -0.525436             | 0.618655 | 0.8271               |

**Correlation C\_pooltop2lg2mean\_tp2 symbol LCMS**

**The CORR Procedure**

**Gene\_Symbol=THY1**

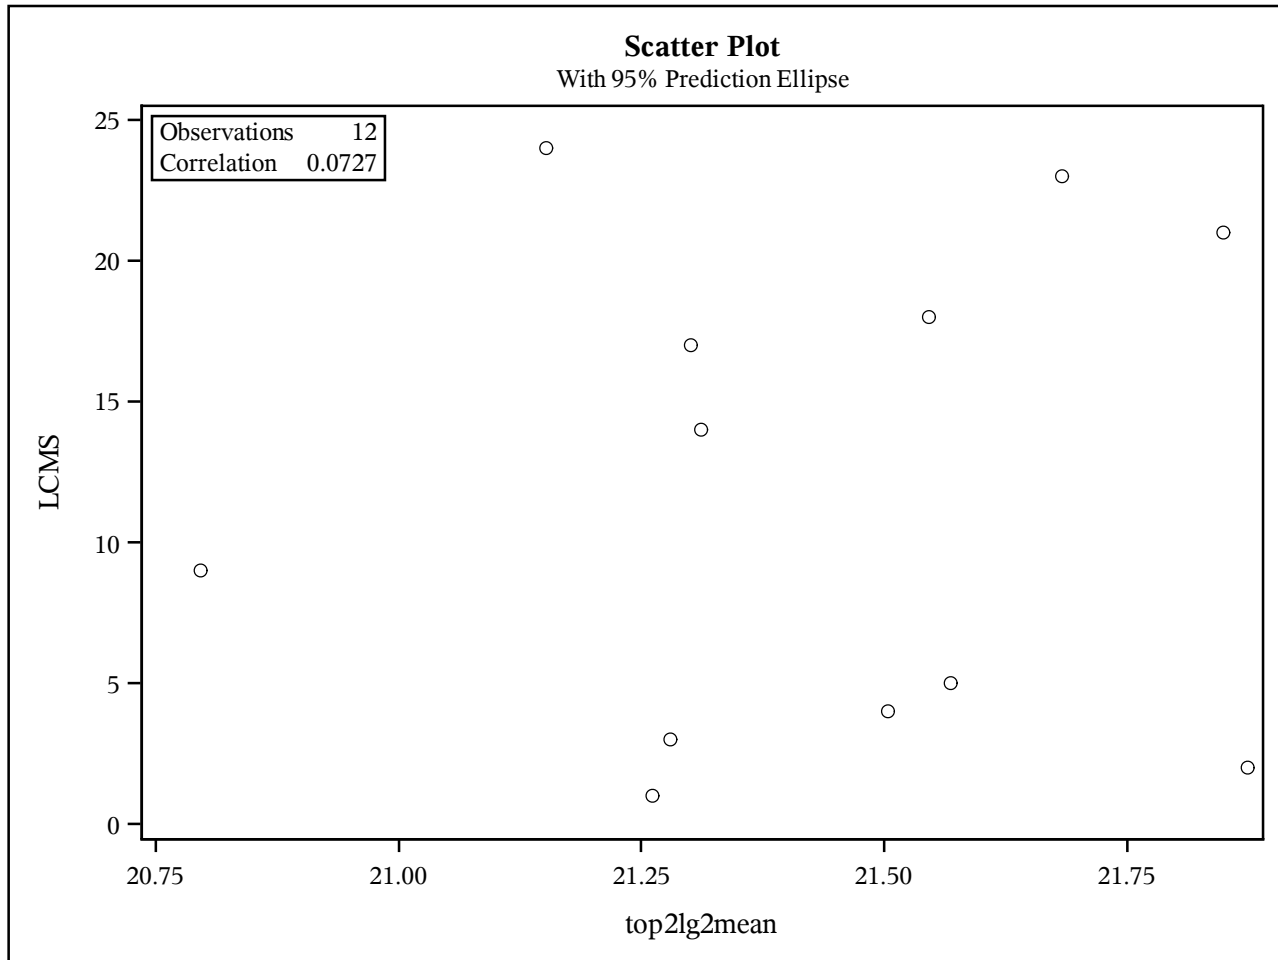



**Correlation C\_pooltop2lg2mean\_tp2 symbol LCMS****The CORR Procedure**

Gene\_Symbol=TTR

2 Variables: top2lg2mean LCMS

| Simple Statistics |    |          |         |           |          |          |
|-------------------|----|----------|---------|-----------|----------|----------|
| Variable          | N  | Mean     | Std Dev | Sum       | Minimum  | Maximum  |
| top2lg2mean       | 12 | 27.71611 | 0.13881 | 332.59337 | 27.42233 | 27.91455 |
| LCMS              | 12 | 11.75000 | 8.70867 | 141.00000 | 1.00000  | 24.00000 |

| Pearson Correlation Coefficients, N = 12<br>Prob >  r  under H0: Rho=0 |                   |                   |
|------------------------------------------------------------------------|-------------------|-------------------|
|                                                                        | top2lg2mean       | LCMS              |
| top2lg2mean                                                            | 1.00000           | 0.46726<br>0.1256 |
| LCMS                                                                   | 0.46726<br>0.1256 | 1.00000           |

**Pearson Correlation Statistics (Fisher's z Transformation)**

| Variable    | With Variable | N  | Sample Correlation | Fisher's z | Bias Adjustment | Correlation Estimate | 95% Confidence Limits |          | p Value for H0:Rho=0 |
|-------------|---------------|----|--------------------|------------|-----------------|----------------------|-----------------------|----------|----------------------|
| top2lg2mean | LCMS          | 12 | 0.46726            | 0.50656    | 0.02124         | 0.45050              | -0.166433             | 0.813958 | 0.1286               |

**Correlation C\_pooltop2lg2mean\_tp2 symbol LCMS**

**The CORR Procedure**

Gene\_Symbol=TTR

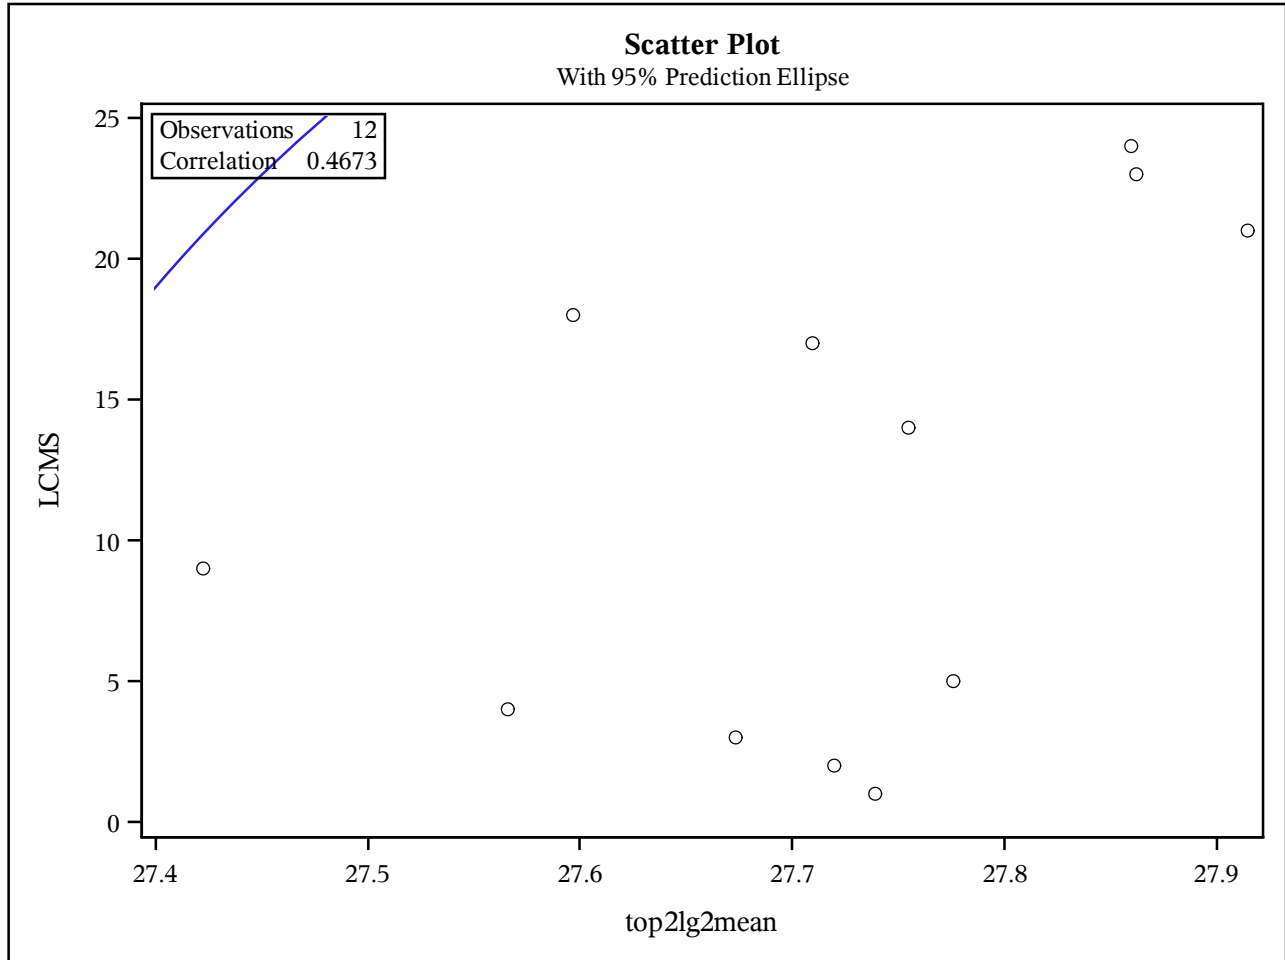

**Correlation C\_pooltop2lg2mean\_tp2 symbol LCMS****The CORR Procedure**

Gene\_Symbol=UBA52

2 Variables: top2lg2mean LCMS

| Simple Statistics |    |          |         |           |          |          |
|-------------------|----|----------|---------|-----------|----------|----------|
| Variable          | N  | Mean     | Std Dev | Sum       | Minimum  | Maximum  |
| top2lg2mean       | 12 | 20.04327 | 0.66303 | 240.51925 | 18.84271 | 21.12546 |
| LCMS              | 12 | 11.75000 | 8.70867 | 141.00000 | 1.00000  | 24.00000 |

| Pearson Correlation Coefficients, N = 12<br>Prob >  r  under H0: Rho=0 |                   |                   |
|------------------------------------------------------------------------|-------------------|-------------------|
|                                                                        | top2lg2mean       | LCMS              |
| top2lg2mean                                                            | 1.00000           | 0.05962<br>0.8540 |
| LCMS                                                                   | 0.05962<br>0.8540 | 1.00000           |

| Pearson Correlation Statistics (Fisher's z Transformation) |               |    |                    |            |                 |                      |                       |          |                      |
|------------------------------------------------------------|---------------|----|--------------------|------------|-----------------|----------------------|-----------------------|----------|----------------------|
| Variable                                                   | With Variable | N  | Sample Correlation | Fisher's z | Bias Adjustment | Correlation Estimate | 95% Confidence Limits |          | p Value for H0:Rho=0 |
| top2lg2mean                                                | LCMS          | 12 | 0.05962            | 0.05969    | 0.00271         | 0.05692              | -0.534439             | 0.610868 | 0.8579               |

**Correlation C\_pooltop2lg2mean\_tp2 symbol LCMS**

**The CORR Procedure**

Gene\_Symbol=UBA52

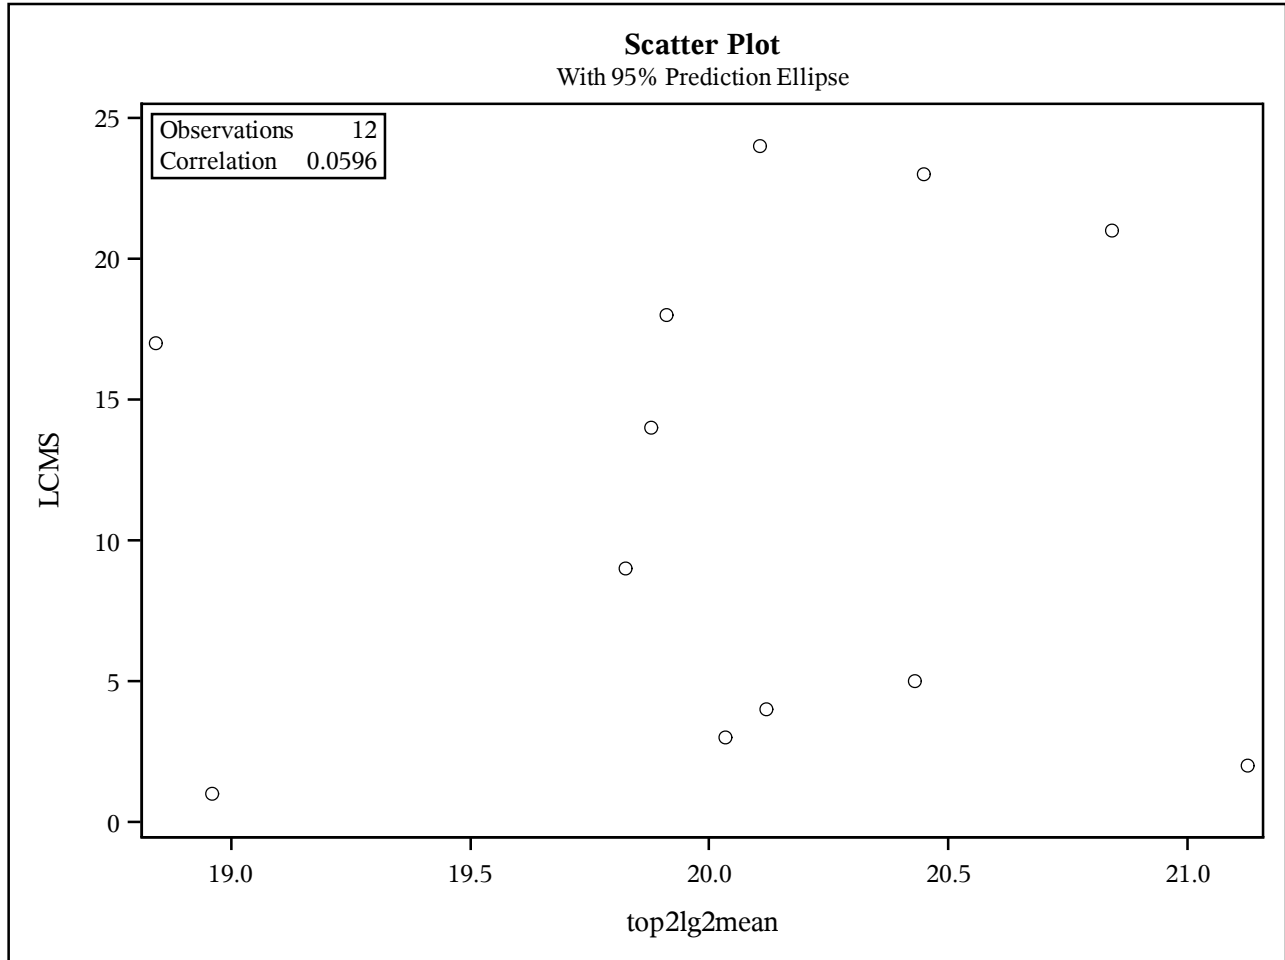

**Correlation C\_pooltop2lg2mean\_tp2 symbol LCMS****The CORR Procedure**

Gene\_Symbol=VGF

2 Variables: top2lg2mean LCMS

| Simple Statistics |    |          |         |           |          |          |
|-------------------|----|----------|---------|-----------|----------|----------|
| Variable          | N  | Mean     | Std Dev | Sum       | Minimum  | Maximum  |
| top2lg2mean       | 12 | 17.78075 | 0.64762 | 213.36900 | 16.63359 | 18.78800 |
| LCMS              | 12 | 11.75000 | 8.70867 | 141.00000 | 1.00000  | 24.00000 |

| Pearson Correlation Coefficients, N = 12<br>Prob >  r  under H0: Rho=0 |                    |                    |
|------------------------------------------------------------------------|--------------------|--------------------|
|                                                                        | top2lg2mean        | LCMS               |
| top2lg2mean                                                            | 1.00000            | -0.27675<br>0.3839 |
| LCMS                                                                   | -0.27675<br>0.3839 | 1.00000            |

| Pearson Correlation Statistics (Fisher's z Transformation) |               |    |                    |            |                 |                      |                       |          |                      |
|------------------------------------------------------------|---------------|----|--------------------|------------|-----------------|----------------------|-----------------------|----------|----------------------|
| Variable                                                   | With Variable | N  | Sample Correlation | Fisher's z | Bias Adjustment | Correlation Estimate | 95% Confidence Limits |          | p Value for H0:Rho=0 |
| top2lg2mean                                                | LCMS          | 12 | -0.27675           | -0.28416   | -0.01258        | -0.26509             | -0.728207             | 0.364221 | 0.3940               |

**Correlation C\_pooltop2lg2mean\_tp2 symbol LCMS**

**The CORR Procedure**

Gene\_Symbol=VGF

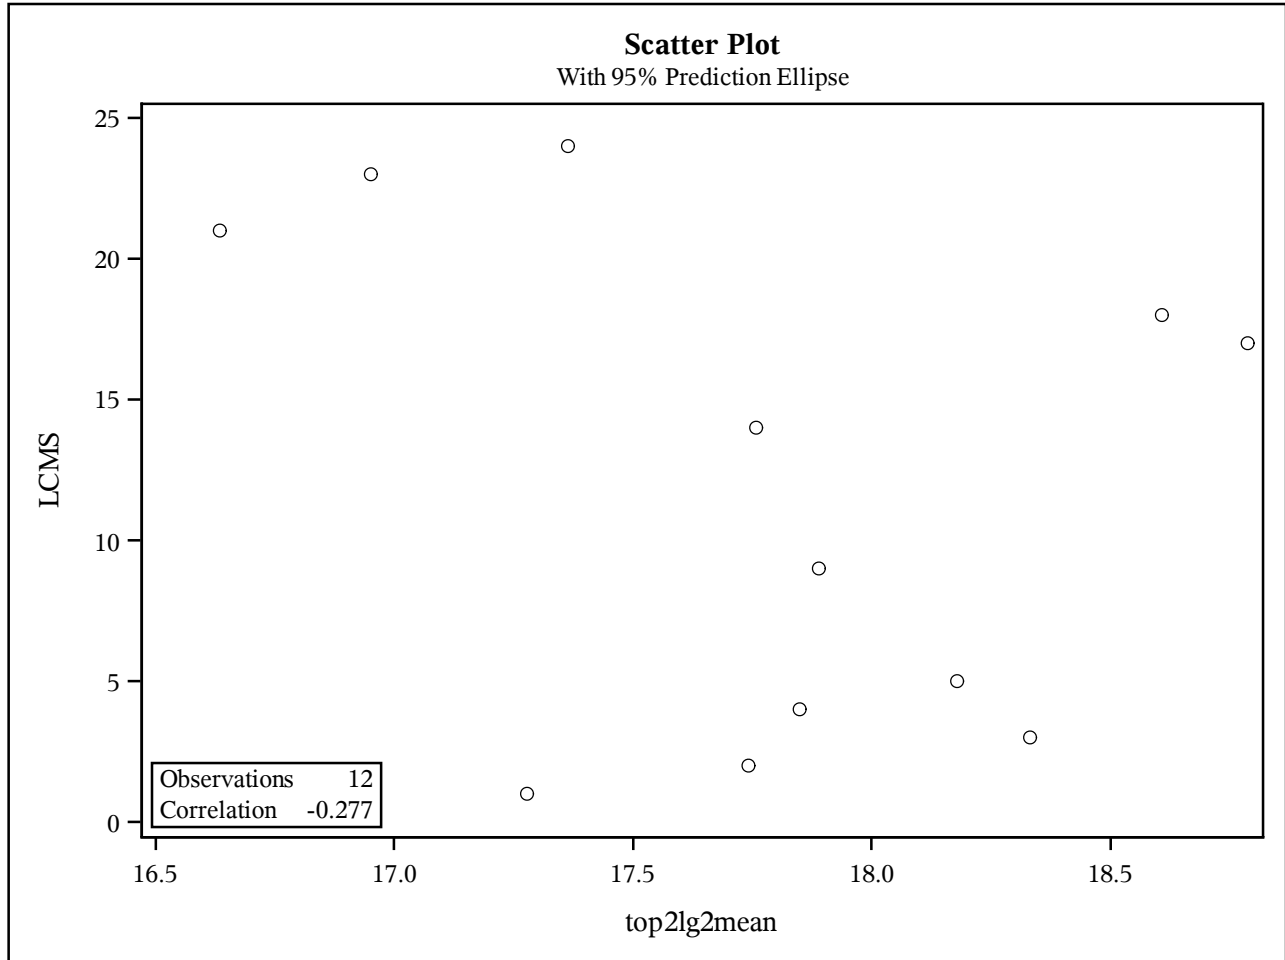

**Correlation C\_pooltop2lg2mean\_tp2 symbol LCMS****The CORR Procedure**

Gene\_Symbol=VSTM2A

2 Variables: top2lg2mean LCMS

| Simple Statistics |    |          |         |           |          |          |
|-------------------|----|----------|---------|-----------|----------|----------|
| Variable          | N  | Mean     | Std Dev | Sum       | Minimum  | Maximum  |
| top2lg2mean       | 12 | 18.95094 | 0.20903 | 227.41134 | 18.48949 | 19.22659 |
| LCMS              | 12 | 11.75000 | 8.70867 | 141.00000 | 1.00000  | 24.00000 |

| Pearson Correlation Coefficients, N = 12<br>Prob >  r  under H0: Rho=0 |                   |                   |
|------------------------------------------------------------------------|-------------------|-------------------|
|                                                                        | top2lg2mean       | LCMS              |
| top2lg2mean                                                            | 1.00000           | 0.58370<br>0.0463 |
| LCMS                                                                   | 0.58370<br>0.0463 | 1.00000           |

| Pearson Correlation Statistics (Fisher's z Transformation) |               |    |                    |            |                 |                      |                       |          |                      |
|------------------------------------------------------------|---------------|----|--------------------|------------|-----------------|----------------------|-----------------------|----------|----------------------|
| Variable                                                   | With Variable | N  | Sample Correlation | Fisher's z | Bias Adjustment | Correlation Estimate | 95% Confidence Limits |          | p Value for H0:Rho=0 |
| top2lg2mean                                                | LCMS          | 12 | 0.58370            | 0.66806    | 0.02653         | 0.56594              | -0.011792             | 0.860391 | 0.0451               |

**Correlation C\_pooltop2lg2mean\_tp2 symbol LCMS**

**The CORR Procedure**

Gene\_Symbol=VSTM2A

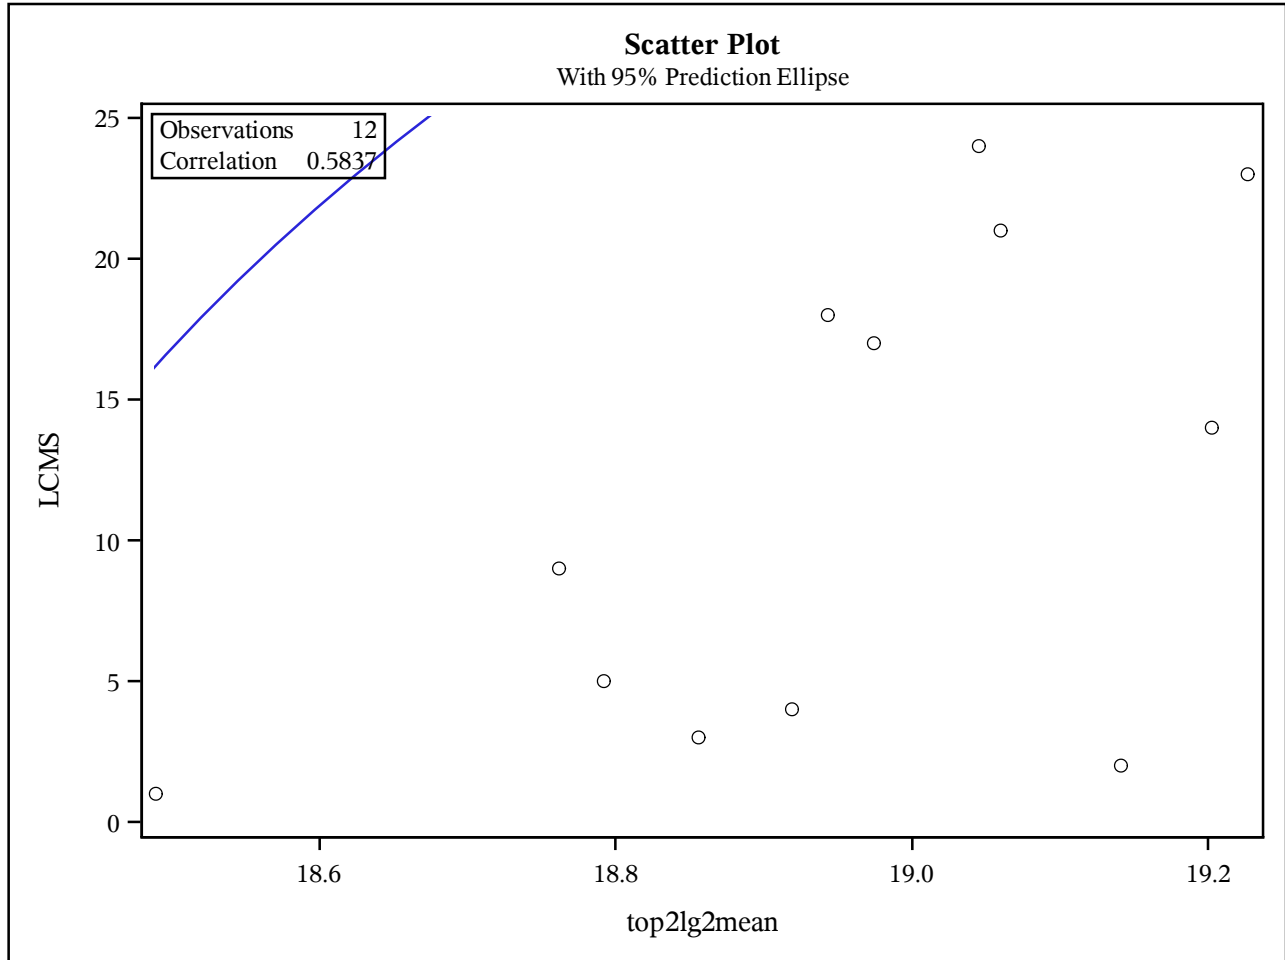



**Correlation C\_pooltop2lg2mean\_tp2 symbol LCMS****The CORR Procedure**

Gene\_Symbol=VTN

2 Variables: top2lg2mean LCMS

| Simple Statistics |    |          |         |           |          |          |
|-------------------|----|----------|---------|-----------|----------|----------|
| Variable          | N  | Mean     | Std Dev | Sum       | Minimum  | Maximum  |
| top2lg2mean       | 12 | 16.88153 | 0.66936 | 202.57832 | 16.23902 | 18.58806 |
| LCMS              | 12 | 11.75000 | 8.70867 | 141.00000 | 1.00000  | 24.00000 |

| Pearson Correlation Coefficients, N = 12<br>Prob >  r  under H0: Rho=0 |                    |                    |
|------------------------------------------------------------------------|--------------------|--------------------|
|                                                                        | top2lg2mean        | LCMS               |
| top2lg2mean                                                            | 1.00000            | -0.08102<br>0.8024 |
| LCMS                                                                   | -0.08102<br>0.8024 | 1.00000            |

| Pearson Correlation Statistics (Fisher's z Transformation) |               |    |                    |            |                 |                      |                       |          |                      |
|------------------------------------------------------------|---------------|----|--------------------|------------|-----------------|----------------------|-----------------------|----------|----------------------|
| Variable                                                   | With Variable | N  | Sample Correlation | Fisher's z | Bias Adjustment | Correlation Estimate | 95% Confidence Limits |          | p Value for H0:Rho=0 |
| top2lg2mean                                                | LCMS          | 12 | -0.08102           | -0.08120   | -0.00368        | -0.07736             | -0.623577             | 0.519611 | 0.8075               |

**Correlation C\_pooltop2lg2mean\_tp2 symbol LCMS**

**The CORR Procedure**

Gene\_Symbol=VTN

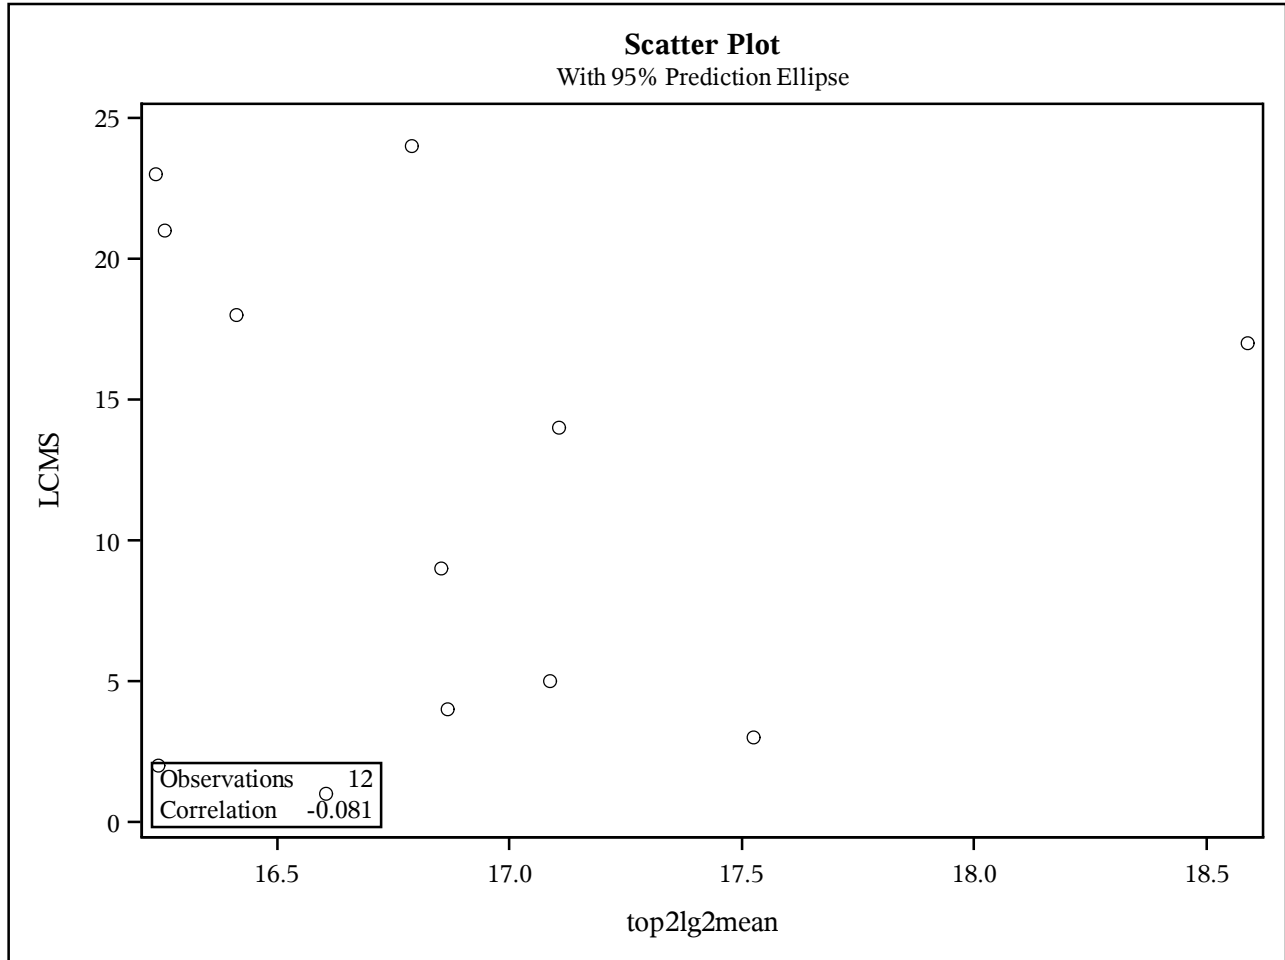

Supplement: pone.0064314.s013.pdf [file pone.0064314.s013.pdf]
